# Supplementary material
Source: publisher site journal article supplement (https://www.spandidos-publications.com/6728/downloadSupplementary)
Supplement: Supplementary file 1 [file downloadSupplementary]

## Sheet: SuppTable 2_circRNA
Table SII. circRNAs expression profiles.
cirRNA_ID	A1	A2	A3	B1	B2	B3	G1	G2	G2_vs_G1_log2FoldChange	G2_vs_G1_Pvalue	G2_vs_G1_FDR	circRNA_type	transcript_id	gene_id	Symbol	Description	cirbase_id	cirbase_chr	cirbase_start	cirbase_end	cirbase_strand	cirRNA_isoform_id	cirRNA_isoform_start	cirRNA_isoform_end	Num_of_exons	exon_sts	exon_ens	cirRNA_isoform_length	strand	Flanking_intron_left	Flanking_intron_right
11:54046208|54092093	3.14526	0	0	0	0	0	1.04842	0	-1.04842	0.334534	0.820938	exon	ENSOCUT00000014941	ENSOCUG00000014937	MTMR12	myotubularin related protein 12	---	---	---	---	---	ENSOCUT00000014941	54046208	54092093	12	54046208,54047210,54051644,54056527,54057960,54060452,54061206,54071653,54081727,54088890,54091027,54092021	54046369,54047377,54051816,54056597,54058038,54060576,54061312,54071728,54081856,54088983,54091157,54092093	1389	-	54042552-54046207	54092094-54093818
9:64588687|64597321	0	0	0	0	1.5665	1.5665	0	1.04434	1.04434	0.404744	0.820938	exon	ENSOCUT00000015487,ENSOCUT00000002266	ENSOCUG00000015482	TMEM241	transmembrane protein 241	---	---	---	---	---	ENSOCUT00000002266	64588687	64597321	5	64588687,64593441,64594235,64595022,64597270	64588721,64593476,64594280,64595070,64597321	218	-	64576947-64588686	64597322-64602732
7:41335688|41346467	0	1.5665	1.5665	0	0	0	1.04434	0	-1.04434	0.415139	0.820938	exon	ENSOCUT00000008792,ENSOCUT00000006739	ENSOCUG00000008790	KMT2E	lysine methyltransferase 2E	---	---	---	---	---	ENSOCUT00000008792	41335688	41346467	6	41335688,41341202,41342694,41343668,41346005,41346337	41335768,41341260,41342875,41343706,41346235,41346467	723	+	41334323-41335654	41346468-41348710
20:11117830|11123453	0	0	0	2.43409	1.5665	0	0	1.33353	1.33353	0.301396	0.820938	exon	ENSOCUT00000003533	ENSOCUG00000003534	PPP2R5E	protein phosphatase 2 regulatory subunit Bepsilon	---	---	---	---	---	ENSOCUT00000003533	11117830	11123453	2	11117830,11123352	11117922,11123453	195	-	11093135-11117829	11123454-11152846
9:11338361|11341878	2.78358	1.5665	2.29975	0	0	0	2.21661	0	-2.21661	0.155931	0.820938	exon	ENSOCUT00000030947	ENSOCUG00000014175	---	---	---	---	---	---	---	ENSOCUT00000030947	11338361	11341878	3	11338361,11341317,11341721	11338473,11341419,11341878	374	+	11333777-11338360	11341879-11343838
7:114729101|114751483	1.5665	0	0	0	1.5665	3.14526	0.522168	1.57059	1.04842	0.465489	0.820938	exon	ENSOCUT00000012156	ENSOCUG00000012156	ATF2	activating transcription factor 2	---	---	---	---	---	ENSOCUT00000012156	114729101	114751483	3	114729101,114738798,114751397	114729307,114738947,114751483	444	-	114715390-114729100	114751484-114755280
16:2974392|2980003	0	0	0	0	2.29975	2.78358	0	1.69444	1.69444	0.22201	0.820938	exon	ENSOCUT00000008267	ENSOCUG00000008269	---	---	---	---	---	---	---	ENSOCUT00000008267	2974392	2980003	4	2974392,2976884,2978233,2979910	2974682,2977013,2978345,2980003	628	-	2973580-2974391	2980004-2980720
4:55001398|55015014	0	0	0	2.43409	1.5665	0	0	1.33353	1.33353	0.301396	0.820938	exon_intron	ENSOCUT00000013858	ENSOCUG00000013857	NAP1L1	nucleosome assembly protein 1 like 1	---	---	---	---	---	ENSOCUT00000013858	55001398	55015014	7	55001398,55002383,55003480,55003797,55009470,55010919,55014978	55001469,55002511,55003560,55003938,55009572,55011004,55015014	650	-	55000025-55001397	---
19:16273841|16275031	1.5665	1.5665	0	0	0	0	1.04434	0	-1.04434	0.415139	0.820938	exon	ENSOCUT00000001508	ENSOCUG00000001504	RPA1	replication protein A1	---	---	---	---	---	ENSOCUT00000001508	16273841	16275031	4	16273841,16274344,16274624,16274963	16273989,16274483,16274816,16275031	551	-	16271518-16273840	16275032-16276608
2:83909060|83909739	0	0	0	0	2.29975	2.29975	0	1.53317	1.53317	0.259149	0.820938	exon	ENSOCUT00000033854,ENSOCUT00000004449	ENSOCUG00000004451	---	---	---	---	---	---	---	ENSOCUT00000004449	83909060	83909739	2	83909060,83909619	83909209,83909739	271	-	83905294-83909059	83909740-83911614
11:81836355|81861005	0	0	0	0	1.5665	1.5665	0	1.04434	1.04434	0.404744	0.820938	exon	ENSOCUT00000009411	ENSOCUG00000009413	SGTB	small glutamine rich tetratricopeptide repeat containing beta	---	---	---	---	---	ENSOCUT00000009411	81836355	81861005	3	81836355,81849891,81860936	81836459,81849990,81861005	275	-	81827352-81836354	81861006-81863944
19:22077827|22080821	0	0	0	1.67902	2.78358	0	0	1.48753	1.48753	0.257503	0.820938	exon	ENSOCUT00000008496	ENSOCUG00000008495	PSMD11	proteasome 26S subunit, non-ATPase 11	---	---	---	---	---	ENSOCUT00000008496	22077827	22080821	4	22077827,22079906,22080470,22080770	22077889,22080031,22080505,22080821	277	+	22075621-22077826	22080822-22081424
3:24971408|25103001	1.5665	0	1.5665	0	0	0	1.04434	0	-1.04434	0.415139	0.820938	exon	ENSOCUT00000011670	ENSOCUG00000011665	ARHGAP26	Rho GTPase activating protein 26	---	---	---	---	---	ENSOCUT00000011670	24971408	25103001	9	24971408,24993814,24997936,25013620,25015153,25016792,25070620,25087312,25102851	24971444,24993879,24998010,25013707,25015211,25016897,25070779,25087450,25103001	881	+	24907354-24971407	25103002-25162701
1:34547509|34564134	0	0	0	0	2.29975	2.29975	0	1.53317	1.53317	0.259149	0.820938	exon	ENSOCUT00000030280	ENSOCUG00000003320	DENND4C	DENN domain containing 4C	---	---	---	---	---	ENSOCUT00000030280	34547509	34564134	8	34547509,34548844,34553893,34554363,34555819,34559403,34563013,34564012	34547704,34549026,34554068,34554472,34555996,34560571,34563159,34564134	2282	-	34545364-34547508	34564135-34570262
13:99347866|99389617	0	0	0	0	1.5665	3.14526	0	1.57059	1.57059	0.241442	0.820938	exon	ENSOCUT00000031843	ENSOCUG00000021747	WDR78	WD repeat domain 78	---	---	---	---	---	ENSOCUT00000031843	99347866	99389617	8	99347866,99353914,99355255,99361059,99373899,99379966,99387122,99389409	99348043,99354098,99355367,99361215,99374038,99380121,99387316,99389617	1333	+	99337590-99347865	99389618-99403214
15:74263724|74273041	0	1.5665	2.29975	0	0	0	1.28875	0	-1.28875	0.324028	0.820938	exon	ENSOCUT00000003381	ENSOCUG00000003379	NUP54	nucleoporin 54	---	---	---	---	---	ENSOCUT00000003381	74263724	74273041	8	74263724,74265457,74266806,74268955,74269422,74271363,74272537,74272931	74263950,74265644,74267002,74269009,74269515,74271470,74272656,74273041	1100	+	74256861-74263723	74273042-74277060
18:16243220|16258977	0	1.5665	1.5665	0	0	0	1.04434	0	-1.04434	0.415139	0.820938	exon	ENSOCUT00000017792,ENSOCUT00000033668	ENSOCUG00000017791	SGPL1	sphingosine-1-phosphate lyase 1	---	---	---	---	---	ENSOCUT00000017792	16243220	16258977	5	16243220,16244679,16247335,16252296,16258812	16243348,16244755,16247482,16252363,16258977	588	-	16235922-16243219	16258978-16259685
13:111926126|111928893	1.5665	2.29975	1.5665	0	1.5665	0	1.81092	0.522168	-1.28875	0.49058	0.820938	exon	ENSOCUT00000015635	ENSOCUG00000015591	USP24	ubiquitin specific peptidase 24	---	---	---	---	---	ENSOCUT00000015635	111926126	111928893	3	111926126,111927909,111928828	111926247,111928022,111928893	302	+	111924356-111926125	111928894-111931079
3:21033874|21066350	1.5665	1.5665	0	0	0	0	1.04434	0	-1.04434	0.415139	0.820938	exon_intron	ENSOCUT00000007747	ENSOCUG00000007744	CTNNA1	catenin alpha-1	---	---	---	---	---	ENSOCUT00000007747	21033874	21066350	4	21033874,21036121,21065586,21066231	21033980,21036316,21065752,21066350	590	+	---	21066351-21076911
7:109610785|109619328	0	0	0	0	1.5665	1.5665	0	1.04434	1.04434	0.404744	0.820938	exon	ENSOCUT00000006645	ENSOCUG00000006646	UBR3	ubiquitin protein ligase E3 component n-recognin 3 (putative)	---	---	---	---	---	ENSOCUT00000006645	109610785	109619328	4	109610785,109615063,109617911,109619279	109610924,109615221,109618054,109619328	493	+	---	109619329-109636218
8:53725453|53729258	1.5665	1.5665	0	0	0	0	1.04434	0	-1.04434	0.415139	0.820938	exon	ENSOCUT00000031592	ENSOCUG00000013024	NAA16	N(alpha)-acetyltransferase 16, NatA auxiliary subunit	---	---	---	---	---	ENSOCUT00000031592	53725453	53729258	2	53725453,53729139	53725548,53729258	216	-	53708295-53725452	53729259-53734328
21:12010295|12017321	1.5665	1.5665	0	0	0	0	1.04434	0	-1.04434	0.415139	0.820938	exon	ENSOCUT00000014881	ENSOCUG00000014880	RNF10	ring finger protein 10	---	---	---	---	---	ENSOCUT00000014881	12010295	12017321	5	12010295,12010549,12012942,12013583,12017166	12010453,12010606,12012989,12013638,12017321	477	-	12009330-12010294	12017322-12018546
10:9770169|9775374	0	0	0	1.67902	1.5665	1.5665	0	1.60401	1.60401	0.261302	0.820938	exon	ENSOCUT00000007992	ENSOCUG00000007990	OSBPL3	oxysterol binding protein like 3	---	---	---	---	---	ENSOCUT00000007992	9770169	9775374	5	9770169,9771381,9771677,9774482,9775207	9770325,9771473,9771780,9774602,9775374	643	-	9757255-9770168	9775375-9779403
2:159544280|159549543	0	0	0	0	1.5665	1.5665	0	1.04434	1.04434	0.404744	0.820938	exon	ENSOCUT00000015548	ENSOCUG00000015554	SELENOI	ethanolaminephosphotransferase 1	---	---	---	---	---	ENSOCUT00000015548	159544280	159549543	4	159544280,159546434,159548942,159549475	159544542,159546508,159549050,159549543	516	-	159542374-159544279	159549544-159569052
8:20261782|20272116	0	1.5665	0	1.67902	2.29975	2.29975	0.522168	2.09284	1.57067	0.410451	0.820938	exon	ENSOCUT00000016676	ENSOCUG00000016677	AEBP2	AE binding protein 2	---	---	---	---	---	ENSOCUT00000016676	20261782	20272116	2	20261782,20271909	20261889,20272116	316	-	20247386-20261781	---
6:7633992|7663863	0	0	0	0	1.5665	2.29975	0	1.28875	1.28875	0.315196	0.820938	exon	ENSOCUT00000000324	ENSOCUG00000000322	PARN	poly(A)-specific ribonuclease	---	---	---	---	---	ENSOCUT00000000324	7633992	7663863	13	7633992,7635265,7639878,7642003,7645689,7646724,7647840,7648923,7650202,7660099,7663078,7663244,7663784	7634034,7635308,7639955,7642059,7645769,7646766,7647878,7648988,7650367,7660159,7663159,7663311,7663863	908	-	7632818-7633991	7663864-7667369
17:76760105|76783399	0	3.14526	1.5665	0	0	0	1.57059	0	-1.57059	0.25414	0.820938	exon	ENSOCUT00000007146	ENSOCUG00000007145	KIAA0586	KIAA0586	---	---	---	---	---	ENSOCUT00000007146	76760105	76783399	8	76760105,76768847,76769748,76774838,76777081,76779747,76782440,76783182	76760174,76769021,76769969,76774991,76777248,76779864,76782572,76783399	1258	+	76758710-76760104	76783400-76784181
1:48351576|48375882	0	0	0	1.67902	0	1.5665	0	1.08184	1.08184	0.392701	0.820938	exon	ENSOCUT00000034060,ENSOCUT00000017612	ENSOCUG00000017609	ERMP1	endoplasmic reticulum metallopeptidase 1	---	---	---	---	---	ENSOCUT00000017612	48351576	48375882	7	48351576,48364656,48365761,48368040,48370348,48375165,48375692	48351681,48364802,48365853,48368252,48370568,48375339,48375882	1146	+	48350963-48351575	48375883-48380523
10:44632328|44636926	2.78358	0	3.14526	0	1.5665	0	1.97628	0.522168	-1.45411	0.377846	0.820938	exon	ENSOCUT00000021422,ENSOCUT00000022729	ENSOCUG00000027855	DBNL	drebrin like	---	---	---	---	---	ENSOCUT00000022729	44632328	44636926	8	44632328,44633713,44634617,44635316,44636045,44636273,44636514,44636833	44632383,44633825,44634691,44635462,44636122,44636424,44636577,44636926	779	+	44630009-44632327	44636927-44637638
9:38576295|38588630	2.29975	3.88098	3.67482	2.43409	1.5665	1.5665	3.28518	1.8557	-1.42948	0.427855	0.820938	exon	ENSOCUT00000007156	ENSOCUG00000007155	---	---	---	---	---	---	---	ENSOCUT00000007156	38576295	38588630	4	38576295,38581802,38587392,38588493	38576499,38581955,38587481,38588630	587	-	38548701-38576294	38588631-38647872
11:82109802|82127233	1.5665	1.5665	1.5665	0	0	0	1.5665	0	-1.5665	0.276971	0.820938	exon	ENSOCUT00000003801	ENSOCUG00000003795	ERBIN	erbb2 interacting protein	---	---	---	---	---	ENSOCUT00000003801	82109802	82127233	5	82109802,82113329,82124892,82126114,82127177	82109999,82113446,82124970,82126203,82127233	542	+	82105115-82109801	82127234-82131300
2:112538144|112549056	1.5665	2.29975	1.5665	0	0	0	1.81092	0	-1.81092	0.22087	0.820938	exon	ENSOCUT00000003666	ENSOCUG00000003666	DGUOK	deoxyguanosine kinase	---	---	---	---	---	ENSOCUT00000003666	112538144	112549056	4	112538144,112538827,112544871,112548869	112538243,112538942,112545018,112549056	552	-	112536718-112538143	112549057-112557946
11:85327821|85331037	0	0	0	0	1.5665	1.5665	0	1.04434	1.04434	0.404744	0.820938	exon	ENSOCUT00000010474,ENSOCUT00000031684	ENSOCUG00000010472	SLC30A5	solute carrier family 30 member 5	---	---	---	---	---	ENSOCUT00000010474	85327821	85331037	4	85327821,85328491,85328959,85330880	85327991,85328779,85329167,85331037	827	+	85326327-85327820	85331038-85332007
3:68910389|68939432	2.29975	1.5665	0	0	0	0	1.28875	0	-1.28875	0.324028	0.820938	exon	ENSOCUT00000016296	ENSOCUG00000016298	ATP6V1H	ATPase H+ transporting V1 subunit H	---	---	---	---	---	ENSOCUT00000016296	68910389	68939432	5	68910389,68921941,68924333,68931865,68939335	68910490,68922066,68924511,68932057,68939432	698	-	68897368-68910388	68939433-68951062
2:96828482|96841856	0	1.5665	1.5665	0	0	0	1.04434	0	-1.04434	0.415139	0.820938	exon	ENSOCUT00000023178	ENSOCUG00000012926	ANAPC1	anaphase promoting complex subunit 1	---	---	---	---	---	ENSOCUT00000023178	96828482	96841856	10	96828482,96828660,96830709,96835858,96836777,96837182,96838719,96840859,96841514,96841805	96828547,96828750,96830804,96836067,96836997,96837327,96838792,96840941,96841614,96841856	1140	-	96820702-96828481	96841857-96844977
7:22583638|22588207	0	0	0	1.67902	0	2.29975	0	1.32626	1.32626	0.308178	0.820938	exon	ENSOCUT00000013241	ENSOCUG00000013237	AASS	aminoadipate-semialdehyde synthase	---	---	---	---	---	ENSOCUT00000013241	22583638	22588207	2	22583638,22588123	22583814,22588207	262	+	22579389-22583637	22588208-22601062
21:8209834|8216235	0	0	0	2.43409	2.29975	1.5665	0	2.10011	2.10011	0.169627	0.820938	exon	ENSOCUT00000025354	ENSOCUG00000021959	HECTD4	HECT domain E3 ubiquitin protein ligase 4	---	---	---	---	---	ENSOCUT00000025354	8209834	8216235	3	8209834,8210354,8216095	8209979,8210586,8216235	520	-	8207847-8209833	8216236-8217681
12:23366411|23367194	0	3.4342	3.4342	0	1.5665	1.5665	2.28947	1.04434	-1.24513	0.41877	0.820938	exon	ENSOCUT00000002134	ENSOCUG00000002135	TAP1	transporter 1, ATP binding cassette subfamily B member	---	---	---	---	---	ENSOCUT00000002134	23366411	23367194	2	23366411,23366989	23366608,23367194	404	-	23364883-23366410	23367195-23369581
12:121134967|121141844	0	0	0	1.67902	1.5665	0	0	1.08184	1.08184	0.392701	0.820938	exon	ENSOCUT00000001800	ENSOCUG00000001799	EPB41L2	erythrocyte membrane protein band 4.1 like 2	---	---	---	---	---	ENSOCUT00000001800	121134967	121141844	2	121134967,121141360	121135179,121141844	698	-	121099808-121134966	---
21:8010649|8013560	0	1.5665	1.5665	0	0	0	1.04434	0	-1.04434	0.415139	0.820938	exon	ENSOCUT00000007226	ENSOCUG00000007226	NAA25	N(alpha)-acetyltransferase 25, NatB auxiliary subunit	---	---	---	---	---	ENSOCUT00000007226	8010649	8013560	2	8010649,8013391	8010761,8013560	283	-	8002323-8010648	8013561-8015489
2:68130561|68135803	2.29975	0	1.5665	0	0	0	1.28875	0	-1.28875	0.324028	0.820938	exon_intron	ENSOCUT00000011286	ENSOCUG00000011284	SLC7A2	solute carrier family 7 member 2	---	---	---	---	---	ENSOCUT00000011286	68130561	68135803	3	68130561,68134050,68135638	68132726,68134183,68135803	2466	-	68130314-68130560	68135804-68142257
14:92367318|92379081	1.5665	2.29975	1.5665	3.82911	3.67482	2.29975	1.81092	3.26789	1.45697	0.413301	0.820938	exon	ENSOCUT00000012299	ENSOCUG00000012301	UBXN7	UBX domain protein 7	---	---	---	---	---	ENSOCUT00000012299	92367318	92379081	3	92367318,92376513,92378969	92367385,92376578,92379081	247	+	92364410-92367317	92379082-92389524
17:36878976|37000142	0	1.5665	1.5665	0	0	0	1.04434	0	-1.04434	0.415139	0.820938	exon	ENSOCUT00000003948	ENSOCUG00000003945	DPH6	diphthamine biosynthesis 6	---	---	---	---	---	ENSOCUT00000003948	36878976	37000142	5	36878976,36883195,36941764,36995366,37000055	36879049,36883313,36941825,36995460,37000142	438	+	36792709-36878975	37000143-37002460
15:95896744|95959296	1.5665	1.5665	1.5665	0	0	0	1.5665	0	-1.5665	0.276971	0.820938	exon	ENSOCUT00000013457	ENSOCUG00000013454	PRDM5	PR/SET domain 5	---	---	---	---	---	ENSOCUT00000013457	95896744	95959296	7	95896744,95919693,95924839,95930009,95952058,95954059,95959217	95896829,95919786,95924999,95930102,95952215,95954143,95959296	758	-	95842074-95896743	95959297-95965055
17:13526212|13559029	0	0	0	0	2.29975	1.5665	0	1.28875	1.28875	0.315196	0.820938	exon	ENSOCUT00000029214	ENSOCUG00000006171	MINDY2	MINDY lysine 48 deubiquitinase 2	---	---	---	---	---	ENSOCUT00000029214	13526212	13559029	5	13526212,13531279,13533725,13544510,13558871	13526412,13531452,13533867,13544612,13559029	780	-	13523159-13526211	13559030-13567117
4:5269617|5273567	1.5665	1.5665	0	0	0	0	1.04434	0	-1.04434	0.415139	0.820938	exon	ENSOCUT00000015364	ENSOCUG00000015354	ITCH	itchy E3 ubiquitin protein ligase	---	---	---	---	---	ENSOCUT00000015364	5269617	5273567	2	5269617,5273393	5269686,5273567	245	-	5259966-5269616	5273568-5277618
7:150849593|150876105	0	0	0	0	1.5665	1.5665	0	1.04434	1.04434	0.404744	0.820938	exon	ENSOCUT00000017007	ENSOCUG00000017001	KANSL1L	KAT8 regulatory NSL complex subunit 1 like	---	---	---	---	---	ENSOCUT00000017007	150849593	150876105	8	150849593,150851370,150852810,150855671,150857122,150860567,150869925,150875937	150849761,150851482,150852861,150855795,150857243,150860701,150870032,150876105	993	-	150848453-150849592	150876106-150900415
11:71930318|71943040	0	0	1.5665	1.67902	1.5665	2.29975	0.522168	1.84843	1.32626	0.477845	0.820938	exon	ENSOCUT00000007840	ENSOCUG00000007839	IL6ST	interleukin 6 signal transducer	---	---	---	---	---	ENSOCUT00000007840	71930318	71943040	6	71930318,71932196,71932864,71937442,71938420,71942962	71930477,71932350,71933030,71937562,71938725,71943040	988	-	71924737-71930317	---
16:25948385|25955301	0	0	0	0	3.4342	1.5665	0	1.6669	1.6669	0.228953	0.820938	exon	ENSOCUT00000012777	ENSOCUG00000012779	GPR137B	G protein-coupled receptor 137B	---	---	---	---	---	ENSOCUT00000012777	25948385	25955301	2	25948385,25955079	25948434,25955301	273	+	25924345-25948384	25955302-25957639
16:48934043|48942062	0	1.5665	2.29975	0	0	0	1.28875	0	-1.28875	0.324028	0.820938	exon	ENSOCUT00000003294	ENSOCUG00000003294	WDR26	WD repeat domain 26	---	---	---	---	---	ENSOCUT00000003294	48934043	48942062	5	48934043,48936773,48937530,48937891,48941877	48934162,48936918,48937608,48938020,48942062	661	+	48930184-48934042	48942063-48945291
13:37108062|37108554	0	0	0	2.43409	1.5665	1.5665	0	1.8557	1.8557	0.204737	0.820938	exon	ENSOCUT00000010184	ENSOCUG00000010186	MSTO1	misato 1, mitochondrial distribution and morphology regulator	---	---	---	---	---	ENSOCUT00000010184	37108062	37108554	2	37108062,37108370	37108166,37108554	290	-	37107983-37108061	37108555-37108626
17:429514|453023	0	0	0	1.67902	0	3.14526	0	1.60809	1.60809	0.241504	0.820938	intergenic region	n/a	n/a	---	---	---	---	---	---	---	17:429514|453023	429514	453023	1	429514	453023	23510	+	---	---
21:11238837|11382434	0	0	0	0	1.5665	2.29975	0	1.28875	1.28875	0.315196	0.820938	exon	ENSOCUT00000017529	ENSOCUG00000017525	MED13L	mediator complex subunit 13 like	---	---	---	---	---	ENSOCUT00000017529	11238837	11382434	3	11238837,11254908,11382197	11238920,11254992,11382434	407	-	11172427-11238836	---
1:14776334|14783803	0	0	0	0	1.5665	1.5665	0	1.04434	1.04434	0.404744	0.820938	exon	ENSOCUT00000016530	ENSOCUG00000016527	GABBR2	gamma-aminobutyric acid type B receptor subunit 2	---	---	---	---	---	ENSOCUT00000016530	14776334	14783803	3	14776334,14780368,14783671	14776414,14780518,14783803	365	+	14765323-14776333	14783804-14797393
20:30013246|30019381	0	1.5665	1.5665	0	0	0	1.04434	0	-1.04434	0.415139	0.820938	exon	ENSOCUT00000010203	ENSOCUG00000010201	NEK9	NIMA related kinase 9	---	---	---	---	---	ENSOCUT00000010203	30013246	30019381	5	30013246,30015621,30016478,30018713,30019189	30013377,30015731,30016542,30018766,30019381	555	+	30010414-30013245	30019382-30021587
14:93071827|93081554	2.29975	1.5665	1.5665	0	0	0	1.81092	0	-1.81092	0.22087	0.820938	exon	ENSOCUT00000012780	ENSOCUG00000012777	LRCH3	leucine rich repeats and calponin homology domain containing 3	---	---	---	---	---	ENSOCUT00000012780	93071827	93081554	4	93071827,93072886,93077142,93081478	93071920,93073006,93077290,93081554	441	+	93065976-93071826	93081555-93088277
14:74645534|74645779	0	1.5665	0	1.67902	3.4342	1.5665	0.522168	2.22658	1.70441	0.327662	0.820938	exon	ENSOCUT00000033249,ENSOCUT00000010634	ENSOCUG00000010631	PIK3CA	phosphatidylinositol-4,5-bisphosphate 3-kinase catalytic subunit alpha	---	---	---	---	---	ENSOCUT00000010634	74645534	74645779	1	74645534	74645779	246	+	74644180-74645533	74645780-74646845
18:51902965|51908888	0	0	0	0	1.5665	1.5665	0	1.04434	1.04434	0.404744	0.820938	exon	ENSOCUT00000003039	ENSOCUG00000003035	SLK	STE20 like kinase	---	---	---	---	---	ENSOCUT00000003039	51902965	51908888	5	51902965,51903173,51904553,51906744,51907515	51903037,51903367,51904634,51906872,51908888	1853	+	51897698-51902964	51908889-51914367
13:121758350|121762159	0	1.5665	1.5665	0	0	0	1.04434	0	-1.04434	0.415139	0.820938	exon	ENSOCUT00000012513	ENSOCUG00000012509	EIF2B3	eukaryotic translation initiation factor 2B subunit gamma	---	---	---	---	---	ENSOCUT00000012513	121758350	121762159	3	121758350,121759476,121762082	121758477,121759666,121762159	397	+	121739651-121758349	121762160-121763618
9:16610830|16613113	2.29975	0	2.29975	0	0	0	1.53317	0	-1.53317	0.266927	0.820938	exon	ENSOCUT00000017700	ENSOCUG00000017699	ARIH2	ariadne RBR E3 ubiquitin protein ligase 2	---	---	---	---	---	ENSOCUT00000017700	16610830	16613113	3	16610830,16611925,16613045	16610981,16612068,16613113	365	+	16607698-16610829	16613114-16615416
4:24281581|24283177	1.5665	1.5665	0	0	0	0	1.04434	0	-1.04434	0.415139	0.820938	exon	ENSOCUT00000016432	ENSOCUG00000016434	BTBD3	BTB domain containing 3	---	---	---	---	---	ENSOCUT00000016432	24281581	24283177	3	24281581,24282266,24282841	24281699,24282356,24283177	547	-	24277478-24281580	24283178-24309258
9:15634506|15646515	0	1.5665	0	1.67902	3.14526	0	0.522168	1.60809	1.08593	0.459488	0.820938	exon	ENSOCUT00000001942	ENSOCUG00000001940	---	---	---	---	---	---	---	ENSOCUT00000001942	15634506	15646515	4	15634506,15635569,15641522,15646423	15634581,15635638,15641591,15646515	309	-	15630144-15634505	15646516-15648630
15:97290265|97296465	0	0	0	0	2.29975	1.5665	0	1.28875	1.28875	0.315196	0.820938	exon	ENSOCUT00000003053	ENSOCUG00000003053	BBS7	Bardet-Biedl syndrome 7	---	---	---	---	---	ENSOCUT00000003053	97290265	97296465	3	97290265,97291482,97296400	97290429,97291627,97296465	377	-	97284721-97290264	97296466-97297454
7:104072178|104076103	0	0	0	1.67902	0	1.5665	0	1.08184	1.08184	0.392701	0.820938	exon	ENSOCUT00000017276	ENSOCUG00000017272	COBLL1	cordon-bleu WH2 repeat protein like 1	---	---	---	---	---	ENSOCUT00000017276	104072178	104076103	2	104072178,104074569	104072354,104076103	1712	-	104065904-104072177	104076104-104080070
2:25882107|25915233	2.78358	1.5665	0	0	0	0	1.45003	0	-1.45003	0.271531	0.820938	exon_intron	ENSOCUT00000015685	ENSOCUG00000015669	ARAP2	ArfGAP with RhoGAP domain, ankyrin repeat and PH domain 2	---	---	---	---	---	ENSOCUT00000015685	25882107	25915233	6	25882107,25895747,25897835,25898698,25899776,25914172	25882176,25896100,25897926,25898777,25899834,25915233	1717	-	25872029-25882106	---
12:75807226|75815701	0	0	0	1.67902	0	1.5665	0	1.08184	1.08184	0.392701	0.820938	exon	ENSOCUT00000017082	ENSOCUG00000017081	RNGTT	RNA guanylyltransferase and 5-phosphatase	---	---	---	---	---	ENSOCUT00000017082	75807226	75815701	3	75807226,75808394,75815461	75807327,75808503,75815701	453	-	75769476-75807225	75815702-75817747
1:151521533|151528823	1.5665	1.5665	0	0	0	0	1.04434	0	-1.04434	0.415139	0.820938	exon	ENSOCUT00000008899	ENSOCUG00000008896	SWAP70	switching B cell complex subunit SWAP70	---	---	---	---	---	ENSOCUT00000008899	151521533	151528823	3	151521533,151524078,151528715	151521760,151524224,151528823	484	+	151501007-151521532	151528824-151531975
17:15861376|15878347	0	0	0	0	2.78358	1.5665	0	1.45003	1.45003	0.261483	0.820938	exon	ENSOCUT00000015100	ENSOCUG00000015094	---	---	---	---	---	---	---	ENSOCUT00000015100	15861376	15878347	5	15861376,15865012,15865313,15874697,15878190	15861493,15865182,15865422,15874920,15878347	781	+	15854325-15861375	15878348-15879327
19:14407474|14412123	0	0	0	1.67902	1.5665	1.5665	0	1.60401	1.60401	0.261302	0.820938	exon	ENSOCUT00000021661	ENSOCUG00000021372	CYB5D2	cytochrome b5 domain containing 2	---	---	---	---	---	ENSOCUT00000021661	14407474	14412123	2	14407474,14411983	14407660,14412123	328	-	14405489-14407473	14412124-14416811
9:62360115|62366228	2.29975	2.78358	1.5665	0	0	0	2.21661	0	-2.21661	0.155931	0.820938	exon	ENSOCUT00000004853	ENSOCUG00000004848	ROCK1	rho-associated protein kinase 1	---	---	---	---	---	ENSOCUT00000004853	62360115	62366228	6	62360115,62360570,62361920,62362800,62365437,62366128	62360253,62360714,62362004,62362975,62365574,62366228	784	-	62358529-62360114	62366229-62375691
16:32445765|32462691	0	1.5665	1.5665	0	0	0	1.04434	0	-1.04434	0.415139	0.820938	exon	ENSOCUT00000002884	ENSOCUG00000002867	LYST	lysosomal trafficking regulator	---	---	---	---	---	ENSOCUT00000002884	32445765	32462691	7	32445765,32449357,32450453,32455321,32456366,32459403,32462518	32446191,32449501,32450626,32455481,32456556,32459648,32462691	1518	+	32436157-32445764	32462692-32465092
2:101161737|101164931	0	1.5665	0	1.67902	2.29975	1.5665	0.522168	1.84843	1.32626	0.477845	0.820938	exon	ENSOCUT00000002534	ENSOCUG00000002533	KCMF1	potassium channel modulatory factor 1	---	---	---	---	---	ENSOCUT00000002534	101161737	101164931	2	101161737,101164830	101161911,101164931	277	-	101157182-101161736	101164932-101173673
12:72563403|72570592	0	0	0	2.43409	1.5665	0	0	1.33353	1.33353	0.301396	0.820938	exon	ENSOCUT00000030045,ENSOCUT00000008943	ENSOCUG00000008929	SNX14	sorting nexin 14	---	---	---	---	---	ENSOCUT00000008943	72563403	72570592	5	72563403,72563694,72564130,72570295,72570552	72563498,72563858,72564253,72570414,72570592	546	-	72552418-72563402	72570593-72574638
15:72669163|72711984	0	0	0	0	1.5665	1.5665	0	1.04434	1.04434	0.404744	0.820938	exon	ENSOCUT00000024356	ENSOCUG00000002497	CNOT6L	CCR4-NOT transcription complex subunit 6 like	---	---	---	---	---	ENSOCUT00000024356	72669163	72711984	7	72669163,72672323,72673839,72697195,72707382,72709420,72711830	72669284,72672509,72673924,72697284,72707450,72709577,72711984	867	+	72621232-72669162	72711985-72720056
11:81782568|81788639	0	0	0	3.29403	1.5665	1.5665	0	2.14234	2.14234	0.144597	0.820938	exon	ENSOCUT00000009409	ENSOCUG00000009409	---	---	---	---	---	---	---	ENSOCUT00000009409	81782568	81788639	3	81782568,81783190,81788555	81782636,81783289,81788639	254	+	81768928-81782567	81788640-81796469
14:78633110|78636483	1.5665	2.29975	2.29975	0	0	0	2.05533	0	-2.05533	0.182249	0.820938	exon	ENSOCUT00000012384	ENSOCUG00000012386	DCUN1D1	defective in cullin neddylation 1 domain containing 1	---	---	---	---	---	ENSOCUT00000012384	78633110	78636483	3	78633110,78634849,78636267	78633240,78635017,78636483	517	-	78618394-78633109	---
18:5973962|5982822	1.5665	0	1.5665	0	0	0	1.04434	0	-1.04434	0.415139	0.820938	exon	ENSOCUT00000031234	ENSOCUG00000027851	PARG	poly(ADP-ribose) glycohydrolase	---	---	---	---	---	ENSOCUT00000031234	5973962	5982822	4	5973962,5974156,5980748,5981839	5974045,5974278,5980931,5982822	1375	-	5968327-5973961	5982823-5983705
17:51131794|51176412	1.5665	1.5665	0	0	0	0	1.04434	0	-1.04434	0.415139	0.820938	exon	ENSOCUT00000007229	ENSOCUG00000007228	HEATR5A	HEAT repeat containing 5A	---	---	---	---	---	ENSOCUT00000007229	51131794	51176412	15	51131794,51133120,51135563,51137976,51141097,51145831,51151419,51155414,51157638,51158668,51163799,51164817,51170420,51174555,51176260	51131862,51133301,51135811,51138155,51141235,51146000,51151608,51155573,51157828,51158773,51163974,51164989,51170529,51174654,51176412	2348	-	51131271-51131786	51176413-51182115
7:173358523|173547708	0	0	0	1.67902	1.5665	0	0	1.08184	1.08184	0.392701	0.820938	exon	ENSOCUT00000033799	ENSOCUG00000029165	DIS3L2	DIS3 like 3-5 exoribonuclease 2	---	---	---	---	---	ENSOCUT00000033799	173358523	173547708	9	173358523,173395444,173396111,173405487,173411884,173476683,173510341,173516489,173547535	173358687,173395591,173396268,173405540,173411985,173476917,173510441,173516736,173547708	1385	+	---	173547709-173594373
2:124884280|124889500	0	0	0	0	0	3.14526	0	1.04842	1.04842	0.327414	0.820938	exon	ENSOCUT00000027359	ENSOCUG00000017819	USP34	ubiquitin specific peptidase 34	---	---	---	---	---	ENSOCUT00000027359	124884280	124889500	3	124884280,124889173,124889373	124884494,124889288,124889500	459	+	124881414-124884279	124889501-124895509
12:121826484|121833777	0	1.5665	1.5665	0	0	0	1.04434	0	-1.04434	0.415139	0.820938	exon	ENSOCUT00000001817	ENSOCUG00000001817	MED23	mediator complex subunit 23	---	---	---	---	---	ENSOCUT00000001817	121826484	121833777	5	121826484,121826750,121828988,121832809,121833603	121826664,121826955,121829112,121832972,121833777	851	-	121825210-121826483	121833778-121835371
6:5203206|5213611	1.5665	0	1.5665	0	0	0	1.04434	0	-1.04434	0.415139	0.820938	exon_intron	ENSOCUT00000017016	ENSOCUG00000017012	ZC3H7A	zinc finger CCCH-type containing 7A	---	---	---	---	---	ENSOCUT00000017016	5203206	5213611	10	5203206,5203687,5206385,5207159,5209100,5209974,5210672,5211805,5213086,5213415	5203282,5203868,5206485,5207355,5209261,5210160,5210736,5212009,5213369,5213611	1657	-	5201915-5203205	5213612-5216182
21:12037537|12037733	0	0	0	1.67902	0	1.5665	0	1.08184	1.08184	0.392701	0.820938	exon	ENSOCUT00000014881	ENSOCUG00000014880	RNF10	ring finger protein 10	---	---	---	---	---	ENSOCUT00000014881	12037537	12037733	1	12037537	12037733	197	-	12037319-12037536	---
12:132725295|132741451	0	0	0	0	0	3.14526	0	1.04842	1.04842	0.327414	0.820938	exon	ENSOCUT00000002552	ENSOCUG00000002554	VTA1	vesicle trafficking 1	---	---	---	---	---	ENSOCUT00000002552	132725295	132741451	2	132725295,132741275	132725403,132741451	286	+	132699172-132725294	132741452-132748959
19:20752847|20770005	0	0	0	2.43409	1.5665	2.29975	0	2.10011	2.10011	0.169627	0.820938	exon	ENSOCUT00000008588	ENSOCUG00000008567	NF1	neurofibromin 1	---	---	---	---	---	ENSOCUT00000008588	20752847	20770005	5	20752847,20762248,20768732,20769028,20769848	20753037,20762354,20768799,20769103,20770005	600	+	20741898-20752846	20770006-20783914
14:91659318|91719935	2.29975	1.5665	0	0	0	0	1.28875	0	-1.28875	0.324028	0.820938	exon	ENSOCUT00000010317	ENSOCUG00000010313	DLG1	discs large MAGUK scaffold protein 1	---	---	---	---	---	ENSOCUT00000010317	91659318	91719935	10	91659318,91668756,91676142,91680460,91683861,91686068,91692207,91698226,91709274,91719833	91659416,91668809,91676192,91680584,91684030,91686204,91692351,91698346,91709430,91719935	1162	+	91625180-91659317	91719936-91733773
16:77665833|77676635	1.5665	1.5665	0	0	0	0	1.04434	0	-1.04434	0.415139	0.820938	exon	ENSOCUT00000016330	ENSOCUG00000016332	CDC73	cell division cycle 73	---	---	---	---	---	ENSOCUT00000016330	77665833	77676635	4	77665833,77669157,77669290,77676566	77665921,77669209,77669352,77676635	275	-	77654241-77665832	77676636-77685512
1:121675858|121691545	1.5665	1.5665	0	0	0	0	1.04434	0	-1.04434	0.415139	0.820938	exon	ENSOCUT00000027386	ENSOCUG00000026640	SESN3	sestrin 3	---	---	---	---	---	ENSOCUT00000027386	121675858	121691545	3	121675858,121689749,121691363	121675923,121689946,121691545	447	+	121625289-121675857	121691546-121696491
8:37142934|37143700	0	3.14526	0	0	0	0	1.04842	0	-1.04842	0.334534	0.820938	exon	ENSOCUT00000008422	ENSOCUG00000008418	B4GALNT3	beta-1,4-N-acetyl-galactosaminyltransferase 3	---	---	---	---	---	ENSOCUT00000008422	37142934	37143700	2	37142934,37143547	37143060,37143700	281	-	37137756-37142933	37143701-37144767
19:38244109|38245048	0	1.5665	1.5665	0	0	0	1.04434	0	-1.04434	0.415139	0.820938	exon_intron	ENSOCUT00000002964	ENSOCUG00000002965	ZNF652	zinc finger protein 652	---	---	---	---	---	ENSOCUT00000002964	38244109	38245048	1	38244109	38245048	940	+	---	38245049-38256791
13:79614529|79614817	0	0	0	1.67902	1.5665	2.29975	0	1.84843	1.84843	0.208882	0.820938	exon	ENSOCUT00000016194	ENSOCUG00000016199	BCL10	B cell CLL/lymphoma 10	---	---	---	---	---	ENSOCUT00000016194	79614529	79614817	1	79614529	79614817	289	+	79600060-79614528	79614818-79617374
2:62863321|62868908	1.5665	1.5665	0	0	0	0	1.04434	0	-1.04434	0.415139	0.820938	exon	ENSOCUT00000033416,ENSOCUT00000012374	ENSOCUG00000012375	UFSP2	UFM1 specific peptidase 2	---	---	---	---	---	ENSOCUT00000012374	62863321	62868908	5	62863321,62865585,62866142,62868578,62868725	62863467,62865777,62866299,62868644,62868908	749	-	62859937-62863320	62868909-62873486
18:40675116|40692760	0	0	0	1.67902	0	1.5665	0	1.08184	1.08184	0.392701	0.820938	exon	ENSOCUT00000033794,ENSOCUT00000000175	ENSOCUG00000000174	EXOC6	exocyst complex component 6	---	---	---	---	---	ENSOCUT00000000175	40675116	40692760	4	40675116,40678688,40680973,40692677	40675320,40678843,40681041,40692760	514	+	40667059-40675115	40692761-40700922
2:93478540|93502961	0	0	0	0	2.29975	1.5665	0	1.28875	1.28875	0.315196	0.820938	exon	ENSOCUT00000003385	ENSOCUG00000003383	MGAT4A	mannosyl (alpha-1,3-)-glycoprotein beta-1,4-N-acetylglucosaminyltransferase, isozyme A	---	---	---	---	---	ENSOCUT00000003385	93478540	93502961	6	93478540,93480793,93491801,93498454,93500647,93502886	93478707,93480933,93491934,93498500,93500760,93502961	680	+	93441624-93478539	93502962-93520153
9:19793780|19805539	1.5665	0	2.29975	0	0	0	1.28875	0	-1.28875	0.324028	0.820938	exon_intron	ENSOCUT00000009858	ENSOCUG00000009854	NEK4	NIMA related kinase 4	---	---	---	---	---	ENSOCUT00000009858	19793780	19805539	5	19793780,19798978,19803847,19805051,19805342	19794208,19799119,19804001,19805158,19805539	1032	-	19787221-19793779	19805540-19807731
17:78210455|78296325	2.29975	1.5665	0	0	0	0	1.28875	0	-1.28875	0.324028	0.820938	exon	ENSOCUT00000003517	ENSOCUG00000003510	OCA2	OCA2 melanosomal transmembrane protein	---	---	---	---	---	ENSOCUT00000003517	78210455	78296325	5	78210455,78254185,78254850,78286259,78296232	78210582,78254244,78254954,78286352,78296325	481	+	78192381-78210454	78296326-78396580
16:57714119|57717963	2.29975	1.5665	2.29975	0	0	0	2.05533	0	-2.05533	0.182249	0.820938	exon	ENSOCUT00000003447,ENSOCUT00000001944	ENSOCUG00000001943	KCTD3	potassium channel tetramerization domain containing 3	---	---	---	---	---	ENSOCUT00000001944	57714119	57717963	4	57714119,57714920,57715271,57717890	57714259,57715000,57715329,57717963	355	-	57713345-57714118	57717964-57720125
1:47715973|47719231	1.5665	0	1.5665	0	0	0	1.04434	0	-1.04434	0.415139	0.820938	exon	ENSOCUT00000000520,ENSOCUT00000033165	ENSOCUG00000000518	---	---	---	---	---	---	---	ENSOCUT00000000520	47715973	47719231	2	47715973,47719122	47716159,47719231	297	-	47710341-47715972	47719232-47734180
16:60682139|60687565	0	0	0	2.9272	3.4342	2.78358	0	3.04833	3.04833	0.0795603	0.820938	exon	ENSOCUT00000033322,ENSOCUT00000017573	ENSOCUG00000017572	PPP2R5A	protein phosphatase 2 regulatory subunit Balpha	---	---	---	---	---	ENSOCUT00000017573	60682139	60687565	2	60682139,60687369	60682240,60687565	299	-	60663767-60682138	60687566-60724024
12:128333344|128333653	3.14526	1.5665	0	0	0	0	1.57059	0	-1.57059	0.25414	0.820938	exon	ENSOCUT00000027469,ENSOCUT00000002309	ENSOCUG00000002310	TNFAIP3	TNF alpha induced protein 3	---	---	---	---	---	ENSOCUT00000002309	128333344	128333653	1	128333344	128333653	310	+	128329839-128333343	128333654-128336863
16:49458880|49465102	0	1.5665	2.29975	0	0	0	1.28875	0	-1.28875	0.324028	0.820938	exon	ENSOCUT00000004628	ENSOCUG00000004626	TP53BP2	tumor protein p53 binding protein 2	---	---	---	---	---	ENSOCUT00000004628	49458880	49465102	3	49458880,49464177,49464969	49459655,49464314,49465102	1048	+	49456713-49458879	49465103-49467102
13:1572108|1609410	0	2.29975	2.78358	0	0	0	1.69444	0	-1.69444	0.229082	0.820938	exon	ENSOCUT00000008670	ENSOCUG00000008664	---	---	---	---	---	---	---	ENSOCUT00000008670	1572108	1609410	4	1572108,1577271,1580425,1609269	1572174,1577373,1580591,1609410	479	+	1542798-1572107	1609411-1609568
15:20980195|20987813	0	1.5665	1.5665	2.9272	2.29975	2.78358	1.04434	2.67018	1.62584	0.418792	0.820938	exon	ENSOCUT00000003271,ENSOCUT00000027936	ENSOCUG00000003271	GAB1	GRB2 associated binding protein 1	---	---	---	---	---	ENSOCUT00000003271	20980195	20987813	5	20980195,20980680,20982605,20987179,20987591	20980498,20980765,20983206,20987259,20987813	1296	-	20972142-20980194	20987814-21002028
3:58256403|58261933	1.5665	1.5665	0	0	0	0	1.04434	0	-1.04434	0.415139	0.820938	exon	ENSOCUT00000003203	ENSOCUG00000011198	---	---	---	---	---	---	---	ENSOCUT00000003203	58256403	58261933	3	58256403,58261526,58261793	58256553,58261671,58261933	438	+	58243232-58256402	58261934-58263022
6:18996019|19002610	0	1.5665	1.5665	0	0	0	1.04434	0	-1.04434	0.415139	0.820938	exon	ENSOCUT00000002734	ENSOCUG00000002727	XPO6	exportin 6	---	---	---	---	---	ENSOCUT00000002734	18996019	19002610	2	18996019,19002451	18996088,19002610	230	+	18993915-18996018	19002611-19006975
8:3764758|3777640	0	1.5665	1.5665	0	0	0	1.04434	0	-1.04434	0.415139	0.820938	exon	ENSOCUT00000034159	ENSOCUG00000015680	PPHLN1	periphilin 1	---	---	---	---	---	ENSOCUT00000034159	3764758	3777640	3	3764758,3767332,3777549	3764819,3767496,3777640	319	-	3756754-3764757	---
19:17492112|17495984	1.5665	1.5665	2.29975	0	0	1.5665	1.81092	0.522168	-1.28875	0.49058	0.820938	exon	ENSOCUT00000005201	ENSOCUG00000005197	ABR	active BCR-related	---	---	---	---	---	ENSOCUT00000005201	17492112	17495984	3	17492112,17494081,17495844	17492277,17494202,17495984	429	-	17486039-17492111	17495985-17496861
2:4078971|4086177	0	3.14526	3.67482	0	1.5665	0	2.27336	0.522168	-1.75119	0.297793	0.820938	exon	ENSOCUT00000009058	ENSOCUG00000009041	BOD1L1	biorientation of chromosomes in cell division 1 like 1	---	---	---	---	---	ENSOCUT00000009058	4078971	4086177	8	4078971,4079151,4081766,4082833,4082955,4084296,4084687,4086098	4079055,4079200,4081811,4082867,4083030,4084369,4084768,4086177	528	-	4078563-4078970	4086178-4087385
11:82109802|82139333	0	1.5665	1.5665	0	0	0	1.04434	0	-1.04434	0.415139	0.820938	exon	ENSOCUT00000003801	ENSOCUG00000003795	ERBIN	erbb2 interacting protein	---	---	---	---	---	ENSOCUT00000003801	82109802	82139333	12	82109802,82113329,82124892,82126114,82127177,82131301,82134527,82135863,82136833,82137413,82137892,82139264	82109999,82113446,82124970,82126203,82127233,82131364,82134601,82136007,82136905,82137542,82138007,82139333	1215	+	82105115-82109801	82139334-82152281
11:59909634|59919316	1.5665	2.29975	0	0	0	0	1.28875	0	-1.28875	0.324028	0.820938	exon	ENSOCUT00000012653	ENSOCUG00000012643	OSMR	oncostatin M receptor	---	---	---	---	---	ENSOCUT00000012653	59909634	59919316	4	59909634,59914209,59917809,59919181	59909803,59914380,59918081,59919316	751	+	59903008-59909633	59919317-59920534
2:15924748|15934128	1.5665	1.5665	0	0	0	0	1.04434	0	-1.04434	0.415139	0.820938	exon	ENSOCUT00000016019	ENSOCUG00000016004	ANAPC4	anaphase promoting complex subunit 4	---	---	---	---	---	ENSOCUT00000016019	15924748	15934128	5	15924748,15928642,15929809,15930156,15934035	15924803,15928691,15929865,15930212,15934128	314	+	15917180-15924747	15934129-15936660
2:77647169|77649596	0	0	0	1.67902	0	2.78358	0	1.48753	1.48753	0.257503	0.820938	exon	ENSOCUT00000025625	ENSOCUG00000020996	---	---	---	---	---	---	---	ENSOCUT00000025625	77647169	77649596	2	77647169,77649458	77647583,77649596	554	+	77643878-77647168	77649597-77650787
X:7286752|7303720	1.5665	0	2.78358	0	0	0	1.45003	0	-1.45003	0.271531	0.820938	exon	ENSOCUT00000014665	ENSOCUG00000014660	CNKSR2	connector enhancer of kinase suppressor of Ras 2	---	---	---	---	---	ENSOCUT00000014665	7286752	7303720	3	7286752,7298443,7303509	7286898,7298576,7303720	493	+	7271467-7286751	7303721-7320856
11:85336062|85339447	3.4342	0	0	0	0	0	1.14473	0	-1.14473	0.294414	0.820938	exon	ENSOCUT00000010474,ENSOCUT00000031684	ENSOCUG00000010472	SLC30A5	solute carrier family 30 member 5	---	---	---	---	---	ENSOCUT00000010474	85336062	85339447	2	85336062,85339319	85336288,85339447	356	+	85334921-85336061	85339448-85340778
2:36780365|36783307	2.78358	0	1.5665	0	0	0	1.45003	0	-1.45003	0.271531	0.820938	exon	ENSOCUT00000007657	ENSOCUG00000007656	TEC	tec protein tyrosine kinase	---	---	---	---	---	ENSOCUT00000007657	36780365	36783307	3	36780365,36780672,36783233	36780581,36780843,36783307	464	-	36775256-36780364	36783308-36787520
18:45188797|45226234	0	0	0	1.67902	0	1.5665	0	1.08184	1.08184	0.392701	0.820938	exon	ENSOCUT00000033788	ENSOCUG00000029435	---	---	---	---	---	---	---	ENSOCUT00000033788	45188797	45226234	5	45188797,45189195,45215761,45223206,45226141	45188862,45189274,45215893,45223493,45226234	661	+	45140769-45188796	45226235-45253252
X:41975075|42041015	0	0	0	1.67902	0	2.78358	0	1.48753	1.48753	0.257503	0.820938	exon_intron	ENSOCUT00000033919	ENSOCUG00000029401	---	---	---	---	---	---	---	ENSOCUT00000033919	41975075	42041015	3	41975075,41999499,42003171	41975183,41999619,42041015	38075	-	41954459-41975074	---
2:25823031|25882176	1.5665	1.5665	0	0	0	0	1.04434	0	-1.04434	0.415139	0.820938	exon	ENSOCUT00000015685	ENSOCUG00000015669	ARAP2	ArfGAP with RhoGAP domain, ankyrin repeat and PH domain 2	---	---	---	---	---	ENSOCUT00000015685	25823031	25882176	14	25823031,25823271,25824098,25825934,25826012,25836660,25837263,25841688,25842597,25846185,25848716,25863165,25871908,25882107	25823094,25823469,25824200,25826007,25826079,25836794,25837437,25841870,25842682,25846384,25848831,25863343,25872028,25882176	1773	-	25805599-25823030	25882177-25895746
16:32107511|32109939	0	0	0	2.43409	1.5665	0	0	1.33353	1.33353	0.301396	0.820938	exon	ENSOCUT00000007509	ENSOCUG00000007508	---	---	---	---	---	---	---	ENSOCUT00000007509	32107511	32109939	2	32107511,32109688	32107711,32109939	453	-	32107385-32107510	32109940-32110264
2:132303779|132304139	1.5665	0	1.5665	0	0	0	1.04434	0	-1.04434	0.415139	0.820938	exon	ENSOCUT00000004707,ENSOCUT00000033961	ENSOCUG00000004696	---	---	---	---	---	---	---	ENSOCUT00000004707	132303779	132304139	2	132303779,132303989	132303843,132304139	216	+	132301943-132303778	132304140-132307975
12:62620470|62632972	0	0	0	1.67902	1.5665	1.5665	0	1.60401	1.60401	0.261302	0.820938	exon	ENSOCUT00000021457	ENSOCUG00000010714	SENP6	SUMO1/sentrin specific peptidase 6	---	---	---	---	---	ENSOCUT00000021457	62620470	62632972	2	62620470,62632585	62620612,62632972	531	+	62603709-62620469	62632973-62638892
13:101758482|101779700	0	1.5665	2.29975	0	0	0	1.28875	0	-1.28875	0.324028	0.820938	exon	ENSOCUT00000023660	ENSOCUG00000015532	CACHD1	cache domain containing 1	---	---	---	---	---	ENSOCUT00000023660	101758482	101779700	10	101758482,101758684,101759892,101763808,101764825,101765588,101772094,101778015,101778785,101779551	101758598,101758783,101760014,101763918,101765006,101765730,101772262,101778132,101778908,101779700	1337	-	101755825-101758481	101779701-101783857
13:37360902|37365216	0	0	2.29975	2.43409	3.4342	2.78358	0.766583	2.88396	2.11737	0.401851	0.820938	exon	ENSOCUT00000014991	ENSOCUG00000014986	ASH1L	ASH1 like histone lysine methyltransferase	---	---	---	---	---	ENSOCUT00000014991	37360902	37365216	4	37360902,37363919,37364783,37365044	37360988,37364009,37364921,37365216	490	+	37359748-37360901	37365217-37366356
12:36866279|36880148	3.14526	2.29975	1.5665	1.67902	0	0	2.33717	0.559675	-1.7775	0.352831	0.820938	exon	ENSOCUT00000005027	ENSOCUG00000005026	CD2AP	CD2 associated protein	---	---	---	---	---	ENSOCUT00000005027	36866279	36880148	2	36866279,36879995	36866439,36880148	315	+	36819687-36866278	36880149-36887940
14:62407543|62426238	0	0	0	1.67902	0	1.5665	0	1.08184	1.08184	0.392701	0.820938	exon	ENSOCUT00000015411	ENSOCUG00000015413	PDCD10	programmed cell death 10	---	---	---	---	---	ENSOCUT00000015411	62407543	62426238	4	62407543,62409553,62416147,62426031	62407669,62409670,62416200,62426238	507	-	62400204-62407542	62426239-62443313
3:140719815|140725822	1.5665	2.29975	2.29975	1.67902	0	0	2.05533	0.559675	-1.49566	0.44671	0.820938	exon	ENSOCUT00000015771	ENSOCUG00000015771	SQLE	squalene epoxidase	---	---	---	---	---	ENSOCUT00000015771	140719815	140725822	5	140719815,140720731,140722182,140722379,140725727	140719995,140720827,140722295,140722550,140725822	660	+	140715413-140719814	140725823-140732184
7:62247511|62273759	1.5665	1.5665	0	0	0	0	1.04434	0	-1.04434	0.415139	0.820938	exon	ENSOCUT00000026465	ENSOCUG00000023503	---	---	---	---	---	---	---	ENSOCUT00000026465	62247511	62273759	9	62247511,62249597,62251729,62252532,62253519,62256023,62263272,62267067,62273624	62247610,62249697,62251807,62252628,62253693,62256135,62263402,62267149,62273759	1015	-	62245789-62247510	62273760-62279517
10:42950324|42978423	1.5665	0	0	0	3.14526	1.5665	0.522168	1.57059	1.04842	0.465489	0.820938	exon_intron	ENSOCUT00000012017	ENSOCUG00000012016	SEMA3D	semaphorin 3D	---	---	---	---	---	ENSOCUT00000012017	42950324	42978423	1	42950324	42978423	28100	+	---	42978424-42999218
15:13323119|13324392	0	2.78358	2.29975	0	0	1.5665	1.69444	0.522168	-1.17227	0.465664	0.820938	exon	ENSOCUT00000007016	ENSOCUG00000007014	SH3D19	SH3 domain containing 19	---	---	---	---	---	ENSOCUT00000007016	13323119	13324392	2	13323119,13324128	13323180,13324392	327	+	13314805-13323118	13324393-13328517
13:1161689|1167547	0	1.5665	2.29975	0	0	0	1.28875	0	-1.28875	0.324028	0.820938	exon	ENSOCUT00000028381	ENSOCUG00000023803	CENPL	centromere protein L	---	---	---	---	---	ENSOCUT00000028381	1161689	1167547	2	1161689,1167296	1162231,1167547	795	-	1159042-1161688	1167548-1169666
5:29292618|29295430	1.5665	3.14526	2.29975	0	0	0	2.33717	0	-2.33717	0.136527	0.820938	exon	ENSOCUT00000005473	ENSOCUG00000005470	PDPR	pyruvate dehydrogenase phosphatase regulatory subunit	---	---	---	---	---	ENSOCUT00000005473	29292618	29295430	5	29292618,29292793,29293544,29294454,29295281	29292699,29292956,29293698,29294571,29295430	669	+	29280674-29292617	29295431-29297063
17:472497|485955	0	3.14526	0	0	0	0	1.04842	0	-1.04842	0.334534	0.820938	intergenic region	n/a	n/a	---	---	---	---	---	---	---	17:472497|485955	472497	485955	1	472497	485955	13459	+	---	---
8:12622909|12637357	2.29975	1.5665	0	0	0	0	1.28875	0	-1.28875	0.324028	0.820938	exon	ENSOCUT00000016197	ENSOCUG00000016191	PPFIBP1	PPFIA binding protein 1	---	---	---	---	---	ENSOCUT00000016197	12622909	12637357	5	12622909,12629758,12630313,12632493,12637152	12623001,12629889,12630426,12632579,12637357	632	-	12621122-12622908	12637358-12639935
18:66019565|66061182	1.5665	1.5665	0	0	0	0	1.04434	0	-1.04434	0.415139	0.820938	exon	ENSOCUT00000015517	ENSOCUG00000015521	CACUL1	CDK2 associated cullin domain 1	---	---	---	---	---	ENSOCUT00000015517	66019565	66061182	7	66019565,66023511,66030749,66036394,66059788,66060142,66061134	66019703,66023600,66030851,66036489,66059893,66060213,66061182	655	-	66014273-66019564	66061183-66090573
2:37574254|37574876	1.5665	0	1.5665	0	0	0	1.04434	0	-1.04434	0.415139	0.820938	exon	ENSOCUT00000017816	ENSOCUG00000017815	CWH43	cell wall biogenesis 43 C-terminal homolog	---	---	---	---	---	ENSOCUT00000017816	37574254	37574876	2	37574254,37574722	37574374,37574876	276	+	37568942-37574253	37574877-37577635
7:159625135|159626435	0	1.5665	0	1.67902	0	3.14526	0.522168	1.60809	1.08593	0.459488	0.820938	exon	ENSOCUT00000005524	ENSOCUG00000005524	TMBIM1	transmembrane BAX inhibitor motif containing 1	---	---	---	---	---	ENSOCUT00000005524	159625135	159626435	3	159625135,159625282,159626335	159625188,159625346,159626435	220	-	159624720-159625134	159626436-159627508
14:89489153|89503953	0	0	0	0	1.5665	1.5665	0	1.04434	1.04434	0.404744	0.820938	exon	ENSOCUT00000015840	ENSOCUG00000015832	OPA1	OPA1, mitochondrial dynamin like GTPase	---	---	---	---	---	ENSOCUT00000015840	89489153	89503953	12	89489153,89490286,89496449,89496641,89497387,89497546,89497984,89499783,89499955,89501984,89503147,89503877	89489239,89490399,89496529,89496715,89497458,89497645,89498114,89499855,89500027,89502099,89503211,89503953	1064	+	89486224-89489152	89503954-89510568
5:23713631|23722801	0	0	0	2.43409	1.5665	0	0	1.33353	1.33353	0.301396	0.820938	exon	ENSOCUT00000010051	ENSOCUG00000010052	NFATC3	nuclear factor of activated T cells 3	---	---	---	---	---	ENSOCUT00000010051	23713631	23722801	3	23713631,23721629,23722675	23713771,23721684,23722801	324	+	23705655-23713630	23722802-23738416
13:135176539|135210981	1.5665	0	1.5665	0	0	0	1.04434	0	-1.04434	0.415139	0.820938	exon	ENSOCUT00000008647	ENSOCUG00000008641	PUM1	pumilio RNA binding family member 1	---	---	---	---	---	ENSOCUT00000008647	135176539	135210981	6	135176539,135177598,135189008,135191140,135209669,135210877	135176647,135177776,135189174,135191410,135209762,135210981	925	+	135154760-135176538	135210982-135215892
16:74597613|74628628	0	0	0	0	1.5665	1.5665	0	1.04434	1.04434	0.404744	0.820938	exon	ENSOCUT00000013976	ENSOCUG00000013965	KCNT2	potassium sodium-activated channel subfamily T member 2	---	---	---	---	---	ENSOCUT00000013976	74597613	74628628	5	74597613,74598969,74601433,74604812,74628520	74597793,74599133,74601569,74604875,74628628	656	+	74545652-74597612	74628629-74656344
1:12964367|12974365	0	1.5665	1.5665	2.9272	1.5665	3.14526	1.04434	2.54632	1.50199	0.423446	0.820938	exon	ENSOCUT00000004235	ENSOCUG00000004233	INVS	inversin	---	---	---	---	---	ENSOCUT00000004235	12964367	12974365	5	12964367,12964996,12968343,12971868,12974185	12964596,12965151,12968514,12971977,12974365	849	-	12954449-12964366	12974366-12982968
16:45521878|45561890	1.5665	1.5665	1.5665	0	0	0	1.5665	0	-1.5665	0.276971	0.820938	exon	ENSOCUT00000016579	ENSOCUG00000016579	MINDY3	MINDY lysine 48 deubiquitinase 3	---	---	---	---	---	ENSOCUT00000016579	45521878	45561890	5	45521878,45522770,45535005,45541515,45561818	45521951,45522849,45535075,45541595,45561890	379	+	45518369-45521877	45561891-45573354
9:88164373|88206682	0	0	0	1.67902	1.5665	2.29975	0	1.84843	1.84843	0.208882	0.820938	exon	ENSOCUT00000006900	ENSOCUG00000006900	PIAS2	protein inhibitor of activated STAT 2	---	---	---	---	---	ENSOCUT00000006900	88164373	88206682	8	88164373,88175700,88176374,88178103,88187241,88187481,88196531,88206208	88164533,88175773,88176479,88178237,88187331,88187531,88196615,88206682	1178	-	88158119-88164372	88206683-88240579
18:62132054|62164509	3.14526	0	0	0	0	0	1.04842	0	-1.04842	0.334534	0.820938	exon	ENSOCUT00000032153	ENSOCUG00000015864	ABLIM1	actin binding LIM protein 1	---	---	---	---	---	ENSOCUT00000032153	62132054	62164509	3	62132054,62136035,62164375	62132163,62136218,62164509	429	-	62110586-62132053	62164510-62194629
17:31031962|31049326	0	0	0	2.43409	2.78358	2.78358	0	2.66708	2.66708	0.109889	0.820938	exon	ENSOCUT00000010767	ENSOCUG00000010763	INO80	INO80 complex subunit	---	---	---	---	---	ENSOCUT00000010767	31031962	31049326	6	31031962,31032345,31033888,31034628,31036235,31049186	31032129,31032478,31033955,31034721,31036406,31049326	777	+	31027788-31031961	31049327-31058637
12:135180628|135280137	0	0	0	2.43409	1.5665	0	0	1.33353	1.33353	0.301396	0.820938	exon	ENSOCUT00000015107	ENSOCUG00000015080	UTRN	utrophin	---	---	---	---	---	ENSOCUT00000015107	135180628	135280137	28	135180628,135181379,135186996,135190209,135193610,135195754,135196835,135197836,135198678,135200958,135205476,135211892,135214262,135214702,135217514,135218066,135223557,135224872,135230246,135235671,135240640,135242320,135245544,135254797,135257135,135261532,135263339,135279948	135180741,135181534,135187166,135190388,135193744,135195903,135196996,135197964,135198851,135201113,135205646,135212071,135214390,135214872,135217675,135218203,135223748,135225044,135230396,135235846,135240775,135242469,135245619,135255011,135257252,135261737,135263493,135280137	4416	+	135168614-135180627	135280138-135374303
9:11343839|11351409	0	0	0	0	1.5665	2.29975	0	1.28875	1.28875	0.315196	0.820938	exon	ENSOCUT00000030947	ENSOCUG00000014175	---	---	---	---	---	---	---	ENSOCUT00000030947	11343839	11351409	6	11343839,11346440,11347141,11350687,11350821,11351292	11343937,11346593,11347200,11350714,11350948,11351409	587	+	11341879-11343838	11351410-11359453
3:83098841|83123746	0	0	0	1.67902	1.5665	0	0	1.08184	1.08184	0.392701	0.820938	exon	ENSOCUT00000015890	ENSOCUG00000015867	ARFGEF1	ADP ribosylation factor guanine nucleotide exchange factor 1	---	---	---	---	---	ENSOCUT00000015890	83098841	83123746	4	83098841,83104207,83105583,83123636	83099075,83104340,83105758,83123746	656	-	83095376-83098840	83123747-83127557
16:84256395|84258881	1.5665	1.5665	0	0	0	0	1.04434	0	-1.04434	0.415139	0.820938	exon	ENSOCUT00000013515	ENSOCUG00000013453	HMCN1	hemicentin 1	---	---	---	---	---	ENSOCUT00000013515	84256395	84258881	2	84256395,84258691	84256608,84258881	405	-	84254160-84256394	84258882-84260937
1:17902781|17928983	1.5665	1.5665	0	0	0	0	1.04434	0	-1.04434	0.415139	0.820938	exon	ENSOCUT00000015658	ENSOCUG00000015652	RECK	reversion inducing cysteine rich protein with kazal motifs	---	---	---	---	---	ENSOCUT00000015658	17902781	17928983	6	17902781,17905026,17908714,17911280,17927340,17928898	17902960,17905293,17908911,17911313,17927387,17928983	814	-	17891223-17902780	17928984-17932428
15:25441980|25466561	3.14526	0	0	0	0	0	1.04842	0	-1.04842	0.334534	0.820938	exon_intron	ENSOCUT00000003714	ENSOCUG00000003711	ELF2	E74 like ETS transcription factor 2	---	---	---	---	---	ENSOCUT00000003714	25441980	25466561	2	25441980,25457861	25442214,25466561	8936	+	25440261-25441979	25466562-25504250
X:49845821|49849169	0	0	0	0	1.5665	2.29975	0	1.28875	1.28875	0.315196	0.820938	exon	ENSOCUT00000033382,ENSOCUT00000015682	ENSOCUG00000015656	---	---	---	---	---	---	---	ENSOCUT00000015682	49845821	49849169	4	49845821,49846464,49847024,49848993	49846039,49846682,49847231,49849169	823	+	49845115-49845820	49849170-49849856
18:45901888|45907346	1.5665	0	2.29975	0	0	0	1.28875	0	-1.28875	0.324028	0.820938	exon	ENSOCUT00000001352,ENSOCUT00000034071	ENSOCUG00000001352	ZFYVE27	zinc finger FYVE-type containing 27	---	---	---	---	---	ENSOCUT00000001352	45901888	45907346	5	45901888,45902962,45903565,45906983,45907202	45902000,45903101,45903651,45907003,45907346	506	+	45900230-45901887	45907347-45912695
16:84333831|84348100	0	0	0	0	1.5665	1.5665	0	1.04434	1.04434	0.404744	0.820938	exon	ENSOCUT00000013515	ENSOCUG00000013453	HMCN1	hemicentin 1	---	---	---	---	---	ENSOCUT00000013515	84333831	84348100	6	84333831,84336196,84337315,84341705,84343400,84347977	84334112,84336357,84337437,84341801,84343575,84348100	964	-	84331806-84333830	84348101-84349509
2:125027381|125041547	0	1.5665	1.5665	0	0	0	1.04434	0	-1.04434	0.415139	0.820938	exon	ENSOCUT00000027359	ENSOCUG00000017819	USP34	ubiquitin specific peptidase 34	---	---	---	---	---	ENSOCUT00000027359	125027381	125041547	7	125027381,125028927,125029147,125030279,125039283,125041180,125041404	125027488,125029031,125029271,125030402,125039362,125041320,125041547	827	+	125026439-125027380	125041548-125042595
17:64570438|64585396	3.4342	3.14526	1.5665	0	0	1.5665	2.71532	0.522168	-2.19315	0.24871	0.820938	exon	ENSOCUT00000007557	ENSOCUG00000007550	MIS18BP1	MIS18 binding protein 1	---	---	---	---	---	ENSOCUT00000007557	64570438	64585396	4	64570438,64574202,64582478,64585315	64570601,64574374,64583327,64585396	1269	-	64569900-64570437	64585397-64586104
2:15905965|15908255	0	0	0	0	2.78358	2.29975	0	1.69444	1.69444	0.22201	0.820938	exon	ENSOCUT00000016019	ENSOCUG00000016004	ANAPC4	anaphase promoting complex subunit 4	---	---	---	---	---	ENSOCUT00000016019	15905965	15908255	4	15905965,15907882,15908099,15908211	15906097,15907956,15908125,15908255	280	+	15902539-15905964	15908256-15909150
7:114079152|114103119	0	0	0	0	1.5665	1.5665	0	1.04434	1.04434	0.404744	0.820938	exon	ENSOCUT00000003686	ENSOCUG00000003683	GPR155	G protein-coupled receptor 155	---	---	---	---	---	ENSOCUT00000003686	114079152	114103119	11	114079152,114081161,114084147,114086034,114089535,114095550,114097055,114097239,114100800,114101566,114102964	114079289,114081225,114084242,114086170,114089639,114095760,114097145,114097323,114100917,114101649,114103119	1286	-	114076109-114079151	114103120-114104306
13:114865179|114885565	0	1.5665	0	1.67902	1.5665	2.78358	0.522168	2.0097	1.48753	0.413306	0.820938	exon	ENSOCUT00000027016	ENSOCUG00000004330	NRDC	nardilysin convertase	---	---	---	---	---	ENSOCUT00000027016	114865179	114885565	4	114865179,114874452,114883705,114885443	114865332,114874525,114883800,114885565	447	+	114864036-114865178	114885566-114888857
8:25124816|25161959	0	0	1.5665	0	2.78358	2.29975	0.522168	1.69444	1.17227	0.462339	0.820938	exon_intron	ENSOCUT00000012363	ENSOCUG00000012361	ATF7IP	activating transcription factor 7 interacting protein	---	---	---	---	---	ENSOCUT00000012363	25124816	25161959	5	25124816,25135178,25137236,25138970,25147475	25124881,25135315,25137381,25139056,25161959	14922	-	25105845-25124815	---
13:70061226|70073612	1.5665	1.5665	0	0	0	0	1.04434	0	-1.04434	0.415139	0.820938	exon	ENSOCUT00000004825	ENSOCUG00000004820	ABCD3	ATP binding cassette subfamily D member 3	---	---	---	---	---	ENSOCUT00000004825	70061226	70073612	5	70061226,70061700,70063372,70069428,70073514	70061349,70061797,70063441,70069516,70073612	480	-	70058288-70061225	70073613-70078889
9:19282022|19283405	0	0	0	1.67902	2.29975	0	0	1.32626	1.32626	0.308178	0.820938	exon	ENSOCUT00000008550	ENSOCUG00000008551	---	---	---	---	---	---	---	ENSOCUT00000008550	19282022	19283405	3	19282022,19282743,19283241	19282206,19282922,19283405	530	+	19279500-19282021	19283406-19285909
17:6579076|6593775	0	0	0	1.67902	0	1.5665	0	1.08184	1.08184	0.392701	0.820938	exon	ENSOCUT00000007964	ENSOCUG00000007953	DENND4A	DENN domain containing 4A	---	---	---	---	---	ENSOCUT00000007964	6579076	6593775	11	6579076,6582089,6583763,6584973,6585175,6586444,6586505,6586880,6589904,6592131,6593630	6579317,6582155,6583821,6585009,6585178,6586454,6586597,6587055,6590004,6592349,6593775	1155	+	6577232-6579075	6593780-6594799
13:3166594|3228270	1.5665	1.5665	1.5665	2.9272	3.88098	3.14526	1.5665	3.31781	1.75131	0.32547	0.820938	exon	ENSOCUT00000005468	ENSOCUG00000005463	COP1	COP1, E3 ubiquitin ligase	---	---	---	---	---	ENSOCUT00000005468	3166594	3228270	6	3166594,3193977,3198433,3213240,3226743,3228211	3166737,3194112,3198547,3213297,3226819,3228270	590	-	3163142-3166593	3228271-3241029
4:34249427|34253185	0	0	0	1.67902	1.5665	0	0	1.08184	1.08184	0.392701	0.820938	exon	ENSOCUT00000015720	ENSOCUG00000015715	SMARCD1	SWI/SNF related, matrix associated, actin dependent regulator of chromatin, subfamily d, member 1	---	---	---	---	---	ENSOCUT00000015720	34249427	34253185	3	34249427,34251248,34253063	34249524,34251383,34253185	357	+	34248997-34249426	34253186-34254688
18:8688615|8698764	3.14526	0	0	0	0	0	1.04842	0	-1.04842	0.334534	0.820938	exon	ENSOCUT00000008518	ENSOCUG00000008518	---	---	---	---	---	---	---	ENSOCUT00000008518	8688615	8698764	8	8688615,8689485,8690393,8690865,8691172,8692369,8696514,8698701	8688706,8689608,8690473,8691002,8691309,8692548,8696608,8698764	912	-	8684812-8688614	8698765-8700349
12:125377749|125381631	0	2.78358	1.5665	0	0	0	1.45003	0	-1.45003	0.271531	0.820938	exon	ENSOCUT00000033887,ENSOCUT00000011625	ENSOCUG00000011619	HBS1L	HBS1 like translational GTPase	---	---	---	---	---	ENSOCUT00000011625	125377749	125381631	3	125377749,125380796,125381514	125377853,125380864,125381631	292	-	125373536-125377748	125381632-125382828
14:81949545|81961602	2.29975	0	2.29975	0	0	0	1.53317	0	-1.53317	0.266927	0.820938	exon	ENSOCUT00000011950	ENSOCUG00000011947	YEATS2	YEATS domain containing 2	---	---	---	---	---	ENSOCUT00000011950	81949545	81961602	5	81949545,81951760,81956047,81956613,81961486	81949660,81952005,81956139,81956710,81961602	670	-	81940107-81949544	---
X:61361878|61362964	0	0	0	1.67902	2.78358	2.29975	0	2.25412	2.25412	0.147719	0.820938	exon	ENSOCUT00000004881	ENSOCUG00000004881	AMOT	angiomotin	---	---	---	---	---	ENSOCUT00000004881	61361878	61362964	2	61361878,61362815	61362068,61362964	341	-	61354065-61361877	61362965-61377519
5:28745860|28750592	0	1.5665	1.5665	0	0	0	1.04434	0	-1.04434	0.415139	0.820938	exon	ENSOCUT00000030936	ENSOCUG00000021280	VAC14	Vac14, PIKFYVE complex component	---	---	---	---	---	ENSOCUT00000030936	28745860	28750592	8	28745860,28746178,28747464,28748065,28748493,28748850,28749882,28750440	28746010,28746345,28747526,28748172,28748602,28748956,28750016,28750592	995	+	28732846-28745859	28750593-28762000
6:7645689|7663863	0	1.5665	2.29975	0	0	0	1.28875	0	-1.28875	0.324028	0.820938	exon	ENSOCUT00000000324	ENSOCUG00000000322	PARN	poly(A)-specific ribonuclease	---	---	---	---	---	ENSOCUT00000000324	7645689	7663863	9	7645689,7646724,7647840,7648923,7650202,7660099,7663078,7663244,7663784	7645769,7646766,7647878,7648988,7650367,7660159,7663159,7663311,7663863	686	-	7642060-7645688	7663864-7667369
3:58652176|58656429	1.5665	0	0	1.67902	3.88098	2.78358	0.522168	2.78119	2.25903	0.226493	0.820938	exon	ENSOCUT00000003228	ENSOCUG00000003228	CLK4	CDC like kinase 4	---	---	---	---	---	ENSOCUT00000003228	58652176	58656429	5	58652176,58654645,58655761,58656060,58656313	58652258,58654774,58655855,58656226,58656429	592	-	58648585-58652175	58656430-58659040
15:103635390|103640337	0	0	0	1.67902	0	2.29975	0	1.32626	1.32626	0.308178	0.820938	exon	ENSOCUT00000021311	ENSOCUG00000027940	HSPA4L	heat shock protein family A (Hsp70) member 4 like	---	---	---	---	---	ENSOCUT00000021311	103635390	103640337	4	103635390,103635933,103637421,103640138	103635541,103636039,103637554,103640337	593	+	103633146-103635389	103640338-103646989
19:52772244|52794588	0	0	0	0	2.78358	1.5665	0	1.45003	1.45003	0.261483	0.820938	exon	ENSOCUT00000008019	ENSOCUG00000008011	ABCA8	ATP binding cassette subfamily A member 8	---	---	---	---	---	ENSOCUT00000008019	52772244	52794588	12	52772244,52773968,52774530,52775591,52777316,52783769,52786411,52788521,52789430,52790898,52792328,52794469	52772364,52774059,52774598,52775710,52777429,52783942,52786518,52788658,52789563,52791064,52792517,52794588	1547	-	52762345-52772243	52794589-52802087
13:132246435|132259894	0	0	0	1.67902	0	1.5665	0	1.08184	1.08184	0.392701	0.820938	exon	ENSOCUT00000030490	ENSOCUG00000002451	EIF4G3	eukaryotic translation initiation factor 4 gamma 3	---	---	---	---	---	ENSOCUT00000030490	132246435	132259894	7	132246435,132246941,132248447,132251878,132256876,132258337,132259780	132246581,132247177,132248551,132252010,132256970,132258430,132259894	926	+	132232888-132246434	132259895-132263426
17:38076534|38282236	0	0	0	1.67902	2.78358	0	0	1.48753	1.48753	0.257503	0.820938	exon	ENSOCUT00000005602	ENSOCUG00000005597	FMN1	formin 1	---	---	---	---	---	ENSOCUT00000005602	38076534	38282236	12	38076534,38087174,38088379,38090155,38097062,38099279,38118414,38158056,38162876,38214171,38262319,38282061	38076654,38087233,38088525,38090284,38097150,38099340,38118501,38158206,38163684,38214232,38262436,38282236	2013	-	38043537-38076533	38282237-38371195
19:51218587|51257533	0	0	0	0	1.5665	1.5665	0	1.04434	1.04434	0.404744	0.820938	exon	ENSOCUT00000008459	ENSOCUG00000008454	CEP112	centrosomal protein 112	---	---	---	---	---	ENSOCUT00000008459	51218587	51257533	5	51218587,51246732,51249326,51254843,51257390	51218664,51246818,51249425,51254961,51257533	528	+	51217552-51218586	51257534-51279843
14:90268973|90285780	1.5665	1.5665	0	0	0	0	1.04434	0	-1.04434	0.415139	0.820938	exon	ENSOCUT00000016548	ENSOCUG00000016532	ATP13A3	ATPase 13A3	---	---	---	---	---	ENSOCUT00000016548	90268973	90285780	12	90268973,90271219,90273116,90273413,90275658,90278352,90278823,90281419,90282642,90284534,90284807,90285607	90269034,90271407,90273273,90273592,90275789,90278424,90278957,90281488,90282722,90284604,90284989,90285780	1508	-	90261509-90268972	90285781-90288017
7:99223732|99301145	0	0	3.14526	0	0	0	1.04842	0	-1.04842	0.334534	0.820938	exon	ENSOCUT00000017366	ENSOCUG00000017365	RBMS1	RNA binding motif single stranded interacting protein 1	---	---	---	---	---	ENSOCUT00000017366	99223732	99301145	5	99223732,99226644,99241211,99246179,99300970	99223811,99226801,99241302,99246237,99301145	565	-	99208398-99223731	99301146-99348781
13:114915088|114930368	0	0	0	1.67902	1.5665	0	0	1.08184	1.08184	0.392701	0.820938	exon	ENSOCUT00000027016	ENSOCUG00000004330	NRDC	nardilysin convertase	---	---	---	---	---	ENSOCUT00000027016	114915088	114930368	11	114915088,114916703,114917763,114920528,114922237,114926123,114926398,114928477,114928811,114929249,114930278	114915207,114916754,114917913,114920655,114922399,114926154,114926536,114928524,114928863,114929332,114930368	1061	+	114912426-114915087	114930369-114931590
14:30123738|30141902	0	0	0	2.9272	1.5665	2.29975	0	2.26448	2.26448	0.143479	0.820938	exon	ENSOCUT00000012751	ENSOCUG00000012746	STAG1	stromal antigen 1	---	---	---	---	---	ENSOCUT00000012751	30123738	30141902	6	30123738,30126349,30134040,30134537,30138859,30141763	30123912,30126554,30134168,30134685,30138960,30141902	901	-	30121716-30123737	30141903-30143863
3:16082067|16107671	1.5665	1.5665	0	0	0	0	1.04434	0	-1.04434	0.415139	0.820938	exon	ENSOCUT00000008365	ENSOCUG00000008361	HSPA4	heat shock protein family A (Hsp70) member 4	---	---	---	---	---	ENSOCUT00000008365	16082067	16107671	12	16082067,16085305,16086523,16088467,16089498,16093171,16102399,16103707,16104365,16104790,16106509,16107582	16082124,16085445,16086645,16088566,16089631,16093415,16102475,16103858,16104471,16104923,16106690,16107671	1543	+	---	16107672-16111150
9:72581553|72583432	0	0	0	2.43409	1.5665	0	0	1.33353	1.33353	0.301396	0.820938	exon	ENSOCUT00000006500	ENSOCUG00000006498	DSG1	desmoglein 1	---	---	---	---	---	ENSOCUT00000006500	72581553	72583432	2	72581553,72583288	72581708,72583432	301	+	72577973-72581552	72583433-72589029
2:160215304|160277989	1.5665	0	1.5665	0	0	0	1.04434	0	-1.04434	0.415139	0.820938	exon	ENSOCUT00000001250	ENSOCUG00000001249	DTNB	dystrobrevin beta	---	---	---	---	---	ENSOCUT00000001250	160215304	160277989	6	160215304,160223750,160226599,160247585,160263724,160277884	160215371,160223830,160226812,160247670,160263878,160277989	710	+	---	160277990-160281150
11:71372453|71413804	0	1.5665	1.5665	0	0	0	1.04434	0	-1.04434	0.415139	0.820938	exon_intron	ENSOCUT00000004472	ENSOCUG00000004472	PLPP1	phospholipid phosphatase 1	---	---	---	---	---	ENSOCUT00000004472	71372453	71413804	3	71372453,71383976,71391935	71372510,71384256,71413804	22209	-	71360732-71372452	71413805-71449201
20:4968427|4972472	0	0	0	0	1.5665	1.5665	0	1.04434	1.04434	0.404744	0.820938	exon	ENSOCUT00000012010	ENSOCUG00000012009	MPP5	membrane palmitoylated protein 5	---	---	---	---	---	ENSOCUT00000012010	4968427	4972472	3	4968427,4970298,4972311	4968610,4970375,4972472	424	-	4966380-4968426	4972473-4974530
3:19993014|20002789	0	0	0	0	1.5665	1.5665	0	1.04434	1.04434	0.404744	0.820938	exon	ENSOCUT00000007561	ENSOCUG00000007560	KLHL3	kelch like family member 3	---	---	---	---	---	ENSOCUT00000007561	19993014	20002789	2	19993014,20002668	19993179,20002789	288	-	19977284-19993013	20002790-20015572
14:65052705|65064447	0	0	1.5665	0	2.29975	2.78358	0.522168	1.69444	1.17227	0.462339	0.820938	exon	ENSOCUT00000013124	ENSOCUG00000013120	PHC3	polyhomeotic homolog 3	---	---	---	---	---	ENSOCUT00000013124	65052705	65064447	3	65052705,65061874,65064289	65052951,65061972,65064447	505	-	65041936-65052704	65064448-65088001
19:49374804|49379254	0	2.78358	2.29975	0	0	0	1.69444	0	-1.69444	0.229082	0.820938	exon_intron	ENSOCUT00000012763	ENSOCUG00000012756	CEP95	centrosomal protein 95	---	---	---	---	---	ENSOCUT00000012763	49374804	49379254	3	49374804,49377999,49379059	49374954,49378135,49379254	484	+	49373859-49374803	49379255-49380123
18:13415821|13416255	0	0	0	1.67902	1.5665	2.78358	0	2.0097	2.0097	0.174939	0.820938	exon	ENSOCUT00000003166	ENSOCUG00000003163	VCL	vinculin	---	---	---	---	---	ENSOCUT00000003166	13415821	13416255	2	13415821,13416105	13415929,13416255	260	-	13413837-13415820	13416256-13450913
19:3174833|3185053	0	0	0	0	1.5665	1.5665	0	1.04434	1.04434	0.404744	0.820938	exon	ENSOCUT00000013393	ENSOCUG00000013388	ULK2	unc-51 like autophagy activating kinase 2	---	---	---	---	---	ENSOCUT00000013393	3174833	3185053	6	3174833,3176803,3177893,3180022,3181540,3185017	3174915,3176861,3177994,3180095,3181713,3185053	529	-	3164999-3174832	3185054-3185354
3:150150870|150231237	1.5665	1.5665	1.5665	0	0	0	1.5665	0	-1.5665	0.276971	0.820938	exon	ENSOCUT00000017015	ENSOCUG00000017015	ZFAT	zinc finger and AT-hook domain containing	---	---	---	---	---	ENSOCUT00000017015	150150870	150231237	9	150150870,150153158,150156236,150173799,150206654,150206704,150222679,150226871,150231150	150150994,150153284,150156354,150173937,150206701,150206744,150222852,150227020,150231237	1011	-	150129664-150150869	150231238-150244145
8:25098172|25149051	0	1.5665	1.5665	0	0	0	1.04434	0	-1.04434	0.415139	0.820938	exon_intron	ENSOCUT00000012363	ENSOCUG00000012361	ATF7IP	activating transcription factor 7 interacting protein	---	---	---	---	---	ENSOCUT00000012363	25098172	25149051	9	25098172,25102267,25105138,25105771,25124816,25135178,25137236,25138970,25147475	25098236,25102905,25105226,25105844,25124881,25135315,25137381,25139056,25149051	2881	-	25087018-25098171	---
9:102451220|102476176	1.5665	1.5665	2.29975	0	0	1.5665	1.81092	0.522168	-1.28875	0.49058	0.820938	exon	ENSOCUT00000005279	ENSOCUG00000005271	PIGN	phosphatidylinositol glycan anchor biosynthesis class N	---	---	---	---	---	ENSOCUT00000005279	102451220	102476176	8	102451220,102458300,102461742,102463773,102466158,102468382,102468934,102475936	102451260,102458416,102461872,102463897,102466264,102468480,102469055,102476176	983	-	102447133-102451219	---
15:37048583|37052898	0	1.5665	1.5665	0	0	0	1.04434	0	-1.04434	0.415139	0.820938	exon	ENSOCUT00000028123	ENSOCUG00000024991	ALPK1	alpha kinase 1	---	---	---	---	---	ENSOCUT00000028123	37048583	37052898	2	37048583,37052667	37048737,37052898	387	-	37006716-37048582	37052899-37078744
X:59544298|59552068	0	2.29975	1.5665	0	0	0	1.28875	0	-1.28875	0.324028	0.820938	exon	ENSOCUT00000023921	ENSOCUG00000007033	PAK3	p21 (RAC1) activated kinase 3	---	---	---	---	---	ENSOCUT00000023921	59544298	59552068	4	59544298,59548668,59549863,59552031	59544398,59548712,59550016,59552068	338	+	59526511-59544297	59552069-59559802
13:38697999|38699925	2.78358	2.29975	1.5665	0	0	0	2.21661	0	-2.21661	0.155931	0.820938	exon	ENSOCUT00000008137	ENSOCUG00000008135	GATAD2B	GATA zinc finger domain containing 2B	---	---	---	---	---	ENSOCUT00000008137	38697999	38699925	3	38697999,38699540,38699808	38698201,38699650,38699925	432	+	38696290-38697998	38699926-38700528
7:111671045|111672644	0	0	0	1.67902	1.5665	0	0	1.08184	1.08184	0.392701	0.820938	exon	ENSOCUT00000034021,ENSOCUT00000005313	ENSOCUG00000005313	HAT1	histone acetyltransferase 1	---	---	---	---	---	ENSOCUT00000005313	111671045	111672644	4	111671045,111671492,111672114,111672538	111671224,111671613,111672218,111672644	514	+	111651529-111671044	111672645-111685189
14:10315303|10317891	0	0	0	1.67902	0	1.5665	0	1.08184	1.08184	0.392701	0.820938	exon	ENSOCUT00000009330	ENSOCUG00000009329	NR1D2	nuclear receptor subfamily 1 group D member 2	---	---	---	---	---	ENSOCUT00000009330	10315303	10317891	2	10315303,10317681	10315488,10317891	397	+	10313109-10315302	10317892-10325699
4:45221840|45222334	0	2.29975	1.5665	0	0	0	1.28875	0	-1.28875	0.324028	0.820938	exon	ENSOCUT00000005911	ENSOCUG00000005909	HELB	DNA helicase B	---	---	---	---	---	ENSOCUT00000005911	45221840	45222334	1	45221840	45222334	495	+	45216634-45221839	45222335-45227194
3:62026610|62026829	0	0	0	0	2.29975	1.5665	0	1.28875	1.28875	0.315196	0.820938	exon	ENSOCUT00000001692	ENSOCUG00000001687	SPIDR	scaffolding protein involved in DNA repair	---	---	---	---	---	ENSOCUT00000001692	62026610	62026829	1	62026610	62026829	220	+	61994536-62026609	62026830-62135779
1:61409194|61412657	1.5665	0	1.5665	0	0	0	1.04434	0	-1.04434	0.415139	0.820938	exon	ENSOCUT00000031472,ENSOCUT00000017017	ENSOCUG00000017017	CARNMT1	carnosine N-methyltransferase 1	---	---	---	---	---	ENSOCUT00000017017	61409194	61412657	3	61409194,61410689,61412517	61409307,61410867,61412657	434	-	61398863-61409193	61412658-61432913
9:15535742|15546224	0	1.5665	1.5665	0	0	0	1.04434	0	-1.04434	0.415139	0.820938	intergenic region	n/a	n/a	---	---	---	---	---	---	---	9:15535742|15546224	15535742	15546224	1	15535742	15546224	10483	-	---	---
7:72919927|72924003	0	0	0	0	1.5665	1.5665	0	1.04434	1.04434	0.404744	0.820938	exon	ENSOCUT00000029720	ENSOCUG00000017366	R3HDM1	R3H domain containing 1	---	---	---	---	---	ENSOCUT00000029720	72919927	72924003	4	72919927,72920070,72923710,72923908	72919986,72920210,72923818,72924003	406	+	72913149-72919926	72924004-72927154
17:429514|514223	2.78358	0	1.5665	0	0	0	1.45003	0	-1.45003	0.271531	0.820938	intergenic region	n/a	n/a	---	---	---	---	---	---	---	17:429514|514223	429514	514223	1	429514	514223	84710	+	---	---
2:173010786|173046307	1.5665	1.5665	2.29975	0	0	0	1.81092	0	-1.81092	0.22087	0.820938	exon	ENSOCUT00000005722	ENSOCUG00000005723	ATAD2B	ATPase family, AAA domain containing 2B	---	---	---	---	---	ENSOCUT00000005722	173010786	173046307	10	173010786,173014980,173019159,173023049,173027067,173032012,173033466,173035573,173036383,173046156	173010901,173015091,173019257,173023124,173027183,173032120,173033568,173035726,173036432,173046307	1088	-	172996103-173010785	173046308-173087460
17:22569610|22589916	1.5665	0	2.29975	0	0	0	1.28875	0	-1.28875	0.324028	0.820938	exon	ENSOCUT00000008080	ENSOCUG00000008075	ATP8B4	ATPase phospholipid transporting 8B4 (putative)	---	---	---	---	---	ENSOCUT00000008080	22569610	22589916	4	22569610,22573598,22586881,22589786	22569693,22573843,22587019,22589916	600	+	22557002-22569609	22589917-22603026
13:37363919|37366523	0	0	0	0	2.29975	2.78358	0	1.69444	1.69444	0.22201	0.820938	exon	ENSOCUT00000014991	ENSOCUG00000014986	ASH1L	ASH1 like histone lysine methyltransferase	---	---	---	---	---	ENSOCUT00000014991	37363919	37366523	4	37363919,37364783,37365044,37366357	37364009,37364921,37365216,37366523	570	+	37360989-37363918	37366524-37369243
3:139602954|139611302	1.5665	1.5665	1.5665	0	0	0	1.5665	0	-1.5665	0.276971	0.820938	exon	ENSOCUT00000011807	ENSOCUG00000011804	FAM91A1	family with sequence similarity 91 member A1	---	---	---	---	---	ENSOCUT00000011807	139602954	139611302	5	139602954,139604028,139604286,139608788,139611153	139603102,139604162,139604399,139608860,139611302	621	+	139593457-139602953	139611303-139614099
3:11769259|11799438	0	0	0	1.67902	0	1.5665	0	1.08184	1.08184	0.392701	0.820938	exon	ENSOCUT00000001812	ENSOCUG00000001808	SLC12A2	solute carrier family 12 member 2	---	---	---	---	---	ENSOCUT00000001812	11769259	11799438	13	11769259,11770601,11770800,11777304,11779471,11781669,11786476,11786702,11790725,11795015,11797040,11798082,11799283	11769378,11770676,11770895,11777443,11779581,11781777,11786603,11786786,11790876,11795122,11797163,11798183,11799438	1507	+	11738894-11769258	11799439-11801302
11:81426084|81456155	1.5665	0	1.5665	0	0	0	1.04434	0	-1.04434	0.415139	0.820938	exon	ENSOCUT00000001528	ENSOCUG00000001525	ADAMTS6	ADAM metallopeptidase with thrombospondin type 1 motif 6	---	---	---	---	---	ENSOCUT00000001528	81426084	81456155	4	81426084,81441306,81443421,81456048	81426186,81441369,81443566,81456155	421	-	81402700-81426083	81456156-81469404
14:19756635|19767072	0	1.5665	1.5665	0	0	0	1.04434	0	-1.04434	0.415139	0.820938	exon	ENSOCUT00000023455	ENSOCUG00000011431	CNOT10	CCR4-NOT transcription complex subunit 10	---	---	---	---	---	ENSOCUT00000023455	19756635	19767072	5	19756635,19760337,19764134,19766472,19766989	19756796,19760487,19764276,19766558,19767072	627	+	19755393-19756634	19767073-19769865
2:76974318|76977200	1.5665	0	0	2.43409	2.29975	1.5665	0.522168	2.10011	1.57795	0.404548	0.820938	exon	ENSOCUT00000005223	ENSOCUG00000005223	---	---	---	---	---	---	---	ENSOCUT00000005223	76974318	76977200	2	76974318,76977126	76974877,76977200	635	-	---	76977201-76986431
5:29498128|29500692	0	1.5665	1.5665	0	0	0	1.04434	0	-1.04434	0.415139	0.820938	exon	ENSOCUT00000009152	ENSOCUG00000009152	RFWD3	ring finger and WD repeat domain 3	---	---	---	---	---	ENSOCUT00000009152	29498128	29500692	3	29498128,29498301,29500622	29498219,29498495,29500692	358	-	29493769-29498127	29500693-29505257
19:50328899|50360000	1.5665	0	1.5665	0	0	0	1.04434	0	-1.04434	0.415139	0.820938	exon	ENSOCUT00000008866	ENSOCUG00000008856	HELZ	helicase with zinc finger	---	---	---	---	---	ENSOCUT00000008866	50328899	50360000	9	50328899,50330184,50331552,50339600,50342245,50348839,50356556,50357957,50359793	50329017,50330329,50331699,50339783,50342473,50349043,50356607,50358147,50360000	1482	+	50325494-50328898	50360001-50369429
X:3620080|3624849	2.78358	0	2.29975	0	0	0	1.69444	0	-1.69444	0.229082	0.820938	exon	ENSOCUT00000025375	ENSOCUG00000013436	NHS	NHS actin remodeling regulator	---	---	---	---	---	ENSOCUT00000025375	3620080	3624849	2	3620080,3624716	3620232,3624849	287	+	3584807-3620079	3624850-3648867
21:3853932|3856461	0	0	0	1.67902	0	1.5665	0	1.08184	1.08184	0.392701	0.820938	exon	ENSOCUT00000031147	ENSOCUG00000022470	DRG1	developmentally regulated GTP binding protein 1	---	---	---	---	---	ENSOCUT00000031147	3853932	3856461	2	3853932,3856331	3854101,3856461	301	+	3846428-3853931	3856462-3858109
2:160263724|160316594	0	0	0	1.67902	1.5665	0	0	1.08184	1.08184	0.392701	0.820938	exon	ENSOCUT00000001250	ENSOCUG00000001249	DTNB	dystrobrevin beta	---	---	---	---	---	ENSOCUT00000001250	160263724	160316594	4	160263724,160277884,160281151,160316470	160263878,160277989,160281317,160316594	553	+	160247671-160263723	160316595-160352057
14:27503773|27506687	0	0	0	0	1.5665	1.5665	0	1.04434	1.04434	0.404744	0.820938	exon	ENSOCUT00000022116	ENSOCUG00000022723	ACAD11	acyl-CoA dehydrogenase family member 11	---	---	---	---	---	ENSOCUT00000022116	27503773	27506687	3	27503773,27504517,27506588	27503934,27504642,27506687	388	-	27499913-27503772	27506688-27519602
7:72927155|72927670	0	0	0	0	1.5665	1.5665	0	1.04434	1.04434	0.404744	0.820938	exon	ENSOCUT00000029720	ENSOCUG00000017366	R3HDM1	R3H domain containing 1	---	---	---	---	---	ENSOCUT00000029720	72927155	72927670	3	72927155,72927285,72927444	72927192,72927335,72927670	316	+	72924004-72927154	72927671-72930454
7:159817596|159834179	0	0	0	0	1.5665	1.5665	0	1.04434	1.04434	0.404744	0.820938	exon	ENSOCUT00000012517	ENSOCUG00000012513	USP37	ubiquitin specific peptidase 37	---	---	---	---	---	ENSOCUT00000012517	159817596	159834179	4	159817596,159819387,159833412,159834001	159817680,159819484,159833489,159834179	440	-	159800451-159817595	159834180-159837453
16:11956738|11957717	0	0	0	1.67902	0	1.5665	0	1.08184	1.08184	0.392701	0.820938	exon	ENSOCUT00000016950	ENSOCUG00000016945	ITIH5	inter-alpha-trypsin inhibitor heavy chain family member 5	---	---	---	---	---	ENSOCUT00000016950	11956738	11957717	2	11956738,11957548	11956854,11957717	287	-	11927772-11956737	11957718-11983182
3:24875987|24889097	2.29975	0	2.29975	0	0	0	1.53317	0	-1.53317	0.266927	0.820938	exon	ENSOCUT00000011670	ENSOCUG00000011665	ARHGAP26	Rho GTPase activating protein 26	---	---	---	---	---	ENSOCUT00000011670	24875987	24889097	4	24875987,24877462,24882937,24889003	24876091,24877591,24883037,24889097	431	+	24869081-24875986	24889098-24907274
18:42238224|42244456	2.29975	0	2.78358	0	1.5665	0	1.69444	0.522168	-1.17227	0.465664	0.820938	exon	ENSOCUT00000007482	ENSOCUG00000007483	TBC1D12	TBC1 domain family member 12	---	---	---	---	---	ENSOCUT00000007482	42238224	42244456	4	42238224,42239217,42243967,42244347	42238312,42239288,42244095,42244456	400	+	42235507-42238217	42244457-42247159
13:135189008|135191410	3.14526	1.5665	3.14526	0	2.29975	0	2.61901	0.766583	-1.85243	0.445347	0.820938	exon	ENSOCUT00000008647	ENSOCUG00000008641	PUM1	pumilio RNA binding family member 1	---	---	---	---	---	ENSOCUT00000008647	135189008	135191410	2	135189008,135191140	135189174,135191410	438	+	135177777-135189007	135191411-135209668
20:8605762|8618670	0	0	0	1.67902	2.29975	0	0	1.32626	1.32626	0.308178	0.820938	exon	ENSOCUT00000030389	ENSOCUG00000014287	SLC38A6	solute carrier family 38 member 6	---	---	---	---	---	ENSOCUT00000030389	8605762	8618670	6	8605762,8606333,8616024,8616332,8618158,8618570	8605844,8606391,8616089,8616385,8618237,8618670	443	+	8595914-8605761	8618671-8625007
15:62694046|62700069	0	1.5665	0	0	2.78358	2.78358	0.522168	1.85572	1.33355	0.413278	0.820938	exon	ENSOCUT00000006131	ENSOCUG00000006131	SPARCL1	SPARC like 1	---	---	---	---	---	ENSOCUT00000006131	62694046	62700069	5	62694046,62694607,62697756,62699185,62699921	62694164,62694727,62697892,62699333,62700069	675	+	62693046-62694045	62700070-62706359
13:5175149|5177833	0	0	0	1.67902	0	2.29975	0	1.32626	1.32626	0.308178	0.820938	exon	ENSOCUT00000031225	ENSOCUG00000023110	---	---	---	---	---	---	---	ENSOCUT00000031225	5175149	5177833	4	5175149,5176013,5176863,5177775	5175230,5176122,5176928,5177833	317	-	5169039-5175148	5177834-5179403
16:16593519|16656047	0	0	0	1.67902	0	1.5665	0	1.08184	1.08184	0.392701	0.820938	exon	ENSOCUT00000006231	ENSOCUG00000006230	UPF2	UPF2, regulator of nonsense mediated mRNA decay	---	---	---	---	---	ENSOCUT00000006231	16593519	16656047	10	16593519,16595622,16605561,16606222,16612695,16637692,16647357,16648897,16651930,16655887	16593722,16595807,16605677,16606335,16612803,16637777,16647460,16649046,16652127,16656047	1429	-	16592042-16593518	16656048-16671116
1:26350156|26351996	1.5665	1.5665	1.5665	0	0	0	1.5665	0	-1.5665	0.276971	0.820938	exon	ENSOCUT00000017669	ENSOCUG00000017666	TEK	TEK receptor tyrosine kinase	---	---	---	---	---	ENSOCUT00000017669	26350156	26351996	2	26350156,26351845	26350300,26351996	297	-	26334720-26350155	26351997-26355257
2:124925254|124928457	0	0	0	0	1.5665	2.78358	0	1.45003	1.45003	0.261483	0.820938	exon	ENSOCUT00000027359	ENSOCUG00000017819	USP34	ubiquitin specific peptidase 34	---	---	---	---	---	ENSOCUT00000027359	124925254	124928457	4	124925254,124927239,124927483,124928371	124925379,124927361,124927566,124928457	420	+	124921821-124925253	124928458-124934350
6:13912859|13934919	0	0	0	0	1.5665	1.5665	0	1.04434	1.04434	0.404744	0.820938	intergenic region	n/a	n/a	---	---	---	---	---	---	---	6:13912859|13934919	13912859	13934919	1	13912859	13934919	22061	-	---	---
12:69122654|69128520	0	0	0	1.67902	2.29975	0	0	1.32626	1.32626	0.308178	0.820938	exon	ENSOCUT00000002162	ENSOCUG00000002154	IBTK	inhibitor of Bruton tyrosine kinase	---	---	---	---	---	ENSOCUT00000002162	69122654	69128520	6	69122654,69123561,69123680,69125628,69126915,69128346	69122750,69123598,69123762,69125714,69127514,69128520	1080	-	69113224-69122653	69128524-69131231
18:67971520|67985076	0	2.29975	1.5665	0	0	0	1.28875	0	-1.28875	0.324028	0.820938	exon	ENSOCUT00000013921	ENSOCUG00000013912	WDR11	WD repeat domain 11	---	---	---	---	---	ENSOCUT00000013921	67971520	67985076	4	67971520,67978650,67981257,67984968	67971604,67978756,67981332,67985076	377	+	67969189-67971519	67985077-67987510
11:82179151|82196128	0	1.5665	1.5665	0	0	0	1.04434	0	-1.04434	0.415139	0.820938	exon	ENSOCUT00000003801	ENSOCUG00000003795	ERBIN	erbb2 interacting protein	---	---	---	---	---	ENSOCUT00000003801	82179151	82196128	7	82179151,82180063,82186926,82189966,82193494,82194677,82196054	82179334,82181611,82187069,82190076,82193700,82194769,82196128	2363	+	82175653-82179150	82196129-82197514
14:19805918|19806854	2.29975	1.5665	2.29975	1.67902	0	0	2.05533	0.559675	-1.49566	0.44671	0.820938	exon	ENSOCUT00000023455	ENSOCUG00000011431	CNOT10	CCR4-NOT transcription complex subunit 10	---	---	---	---	---	ENSOCUT00000023455	19805918	19806854	3	19805918,19806540,19806727	19806048,19806575,19806854	295	+	19802539-19805917	19806855-19810551
1:133619231|133641104	0	1.5665	0	2.9272	2.29975	0	0.522168	1.74232	1.22015	0.444841	0.820938	exon	ENSOCUT00000029978	ENSOCUG00000004462	PCF11	PCF11 cleavage and polyadenylation factor subunit	---	---	---	---	---	ENSOCUT00000029978	133619231	133641104	15	133619231,133620413,133621042,133621478,133622469,133624612,133625278,133629931,133632226,133634313,133634894,133635452,133638526,133639061,133640979	133619460,133620448,133621134,133621633,133622652,133624717,133625397,133630030,133633790,133634796,133635074,133636563,133638720,133639249,133641104	4877	-	---	133641105-133644710
2:142532774|142555824	0	0	0	0	3.4342	0	0	1.14473	1.14473	0.287889	0.820938	exon	ENSOCUT00000027657	ENSOCUG00000024266	PLEKHH2	pleckstrin homology, MyTH4 and FERM domain containing H2	---	---	---	---	---	ENSOCUT00000027657	142532774	142555824	5	142532774,142534562,142538712,142546034,142555666	142532886,142534670,142538891,142546114,142555824	642	-	142528944-142532773	142555825-142558957
12:148217536|148219764	1.5665	0	0	0	2.29975	2.78358	0.522168	1.69444	1.17227	0.462339	0.820938	exon	ENSOCUT00000025544	ENSOCUG00000004762	SYNJ2	synaptojanin 2	---	---	---	---	---	ENSOCUT00000025544	148217536	148219764	2	148217536,148219592	148217632,148219764	270	+	148212793-148217535	148219765-148222084
17:84706765|84712427	0	1.5665	1.5665	0	0	0	1.04434	0	-1.04434	0.415139	0.820938	exon	ENSOCUT00000017416	ENSOCUG00000017417	SNRPA1	small nuclear ribonucleoprotein polypeptide A	---	---	---	---	---	ENSOCUT00000017416	84706765	84712427	6	84706765,84708942,84710603,84711249,84711714,84712334	84706843,84708988,84710705,84711328,84711789,84712427	479	+	84705643-84706764	84712428-84716373
14:119728199|119742507	3.14526	0	2.29975	0	0	0	1.815	0	-1.815	0.211092	0.820938	exon	ENSOCUT00000005340	ENSOCUG00000005336	ABI3BP	ABI family member 3 binding protein	---	---	---	---	---	ENSOCUT00000005340	119728199	119742507	8	119728199,119728811,119729554,119737794,119739777,119740662,119741889,119742433	119728247,119728882,119729646,119737871,119739851,119740736,119741960,119742507	589	+	119716796-119728198	119742508-119753583
X:110399288|110411624	0	0	0	0	1.5665	1.5665	0	1.04434	1.04434	0.404744	0.820938	exon	ENSOCUT00000014144	ENSOCUG00000014143	---	---	---	---	---	---	---	ENSOCUT00000014144	110399288	110411624	7	110399288,110400250,110401829,110402280,110405123,110408088,110411492	110399437,110400339,110402012,110402408,110405286,110408240,110411624	1003	+	110371410-110399287	110411625-110425543
14:107278979|107280275	0	2.29975	1.5665	0	0	0	1.28875	0	-1.28875	0.324028	0.820938	exon	ENSOCUT00000033401,ENSOCUT00000003964	ENSOCUG00000003962	PHLDB2	pleckstrin homology like domain family B member 2	---	---	---	---	---	ENSOCUT00000003964	107278979	107280275	2	107278979,107280132	107279116,107280275	282	-	107266524-107278978	107280276-107285947
7:137474757|137483756	1.5665	1.5665	0	0	0	0	1.04434	0	-1.04434	0.415139	0.820938	exon	ENSOCUT00000009192,ENSOCUT00000023347	ENSOCUG00000009183	ANKRD44	ankyrin repeat domain 44	---	---	---	---	---	ENSOCUT00000009192	137474757	137483756	5	137474757,137479731,137480280,137482660,137483669	137474839,137479813,137480425,137482743,137483756	484	-	137472299-137474756	137483757-137487514
12:107506424|107524709	0	0	0	1.67902	0	2.29975	0	1.32626	1.32626	0.308178	0.820938	exon	ENSOCUT00000013849	ENSOCUG00000013854	CEP85L	centrosomal protein 85 like	---	---	---	---	---	ENSOCUT00000013849	107506424	107524709	3	107506424,107519443,107524591	107506603,107519560,107524709	417	-	107484574-107506423	107524710-107562116
11:78375885|78388676	2.29975	1.5665	0	0	0	0	1.28875	0	-1.28875	0.324028	0.820938	exon	ENSOCUT00000021575	ENSOCUG00000010466	KIF2A	kinesin family member 2A	---	---	---	---	---	ENSOCUT00000021575	78375885	78388676	6	78375885,78376633,78377214,78382573,78383542,78388575	78376089,78376743,78377281,78382686,78383692,78388676	751	+	78375186-78375884	78388677-78391371
8:78887818|78893437	1.5665	1.5665	0	0	0	0	1.04434	0	-1.04434	0.415139	0.820938	exon	ENSOCUT00000011928	ENSOCUG00000011902	MYCBP2	MYC binding protein 2, E3 ubiquitin protein ligase	---	---	---	---	---	ENSOCUT00000011928	78887818	78893437	3	78887818,78889546,78893388	78887962,78889718,78893437	368	-	78882812-78887817	78893438-78893952
9:12459858|12477031	0	0	0	2.43409	1.5665	0	0	1.33353	1.33353	0.301396	0.820938	exon	ENSOCUT00000001906	ENSOCUG00000001908	ATG7	autophagy related 7	---	---	---	---	---	ENSOCUT00000001906	12459858	12477031	4	12459858,12461691,12475224,12476915	12459979,12461779,12475373,12477031	478	-	12453116-12459857	12477032-12481995
10:14948486|14950823	0	0	0	1.67902	1.5665	1.5665	0	1.60401	1.60401	0.261302	0.820938	exon	ENSOCUT00000005294	ENSOCUG00000005295	GARS	glycyl-tRNA synthetase	---	---	---	---	---	ENSOCUT00000005294	14948486	14950823	3	14948486,14949843,14950747	14948627,14949931,14950823	308	+	14946401-14948485	14950824-14956197
7:131334074|131340308	3.4342	3.14526	3.4342	0	2.29975	0	3.33789	0.766583	-2.5713	0.316148	0.820938	exon	ENSOCUT00000002448	ENSOCUG00000002448	GLS	glutaminase	---	---	---	---	---	ENSOCUT00000002448	131334074	131340308	3	131334074,131335867,131340145	131334203,131335946,131340308	374	+	131328070-131334073	131340309-131346912
1:72118106|72121541	1.5665	0	1.5665	0	0	0	1.04434	0	-1.04434	0.415139	0.820938	exon	ENSOCUT00000001993	ENSOCUG00000001990	NAA35	N(alpha)-acetyltransferase 35, NatC auxiliary subunit	---	---	---	---	---	ENSOCUT00000001993	72118106	72121541	4	72118106,72119079,72120888,72121419	72118242,72119146,72121028,72121541	469	+	72114730-72118105	72121542-72126272
1:97558228|97577419	3.14526	0	2.78358	0	0	0	1.97628	0	-1.97628	0.190079	0.820938	exon	ENSOCUT00000025315	ENSOCUG00000005196	ARHGEF12	Rho guanine nucleotide exchange factor 12	---	---	---	---	---	ENSOCUT00000025315	97558228	97577419	5	97558228,97558935,97574481,97576059,97577396	97558277,97559033,97574537,97576144,97577419	316	-	97554512-97558227	---
12:57508371|57530564	1.5665	0	1.5665	0	0	0	1.04434	0	-1.04434	0.415139	0.820938	exon	ENSOCUT00000017133	ENSOCUG00000017134	SMAP1	small ArfGAP 1	---	---	---	---	---	ENSOCUT00000017133	57508371	57530564	2	57508371,57530437	57508461,57530564	219	+	57478960-57508370	57530565-57537642
11:29314980|29333977	0	0	0	1.67902	0	1.5665	0	1.08184	1.08184	0.392701	0.820938	exon	ENSOCUT00000003409	ENSOCUG00000003404	MAN2A1	mannosidase alpha class 2A member 1	---	---	---	---	---	ENSOCUT00000003409	29314980	29333977	5	29314980,29322548,29327362,29332546,29333910	29315157,29322750,29327544,29332660,29333977	747	+	29309696-29314979	29333978-29363637
7:157895819|157899410	0	0	0	0	1.5665	1.5665	0	1.04434	1.04434	0.404744	0.820938	exon	ENSOCUT00000009897	ENSOCUG00000009891	SMARCAL1	SWI/SNF related, matrix associated, actin dependent regulator of chromatin, subfamily a like 1	---	---	---	---	---	ENSOCUT00000009897	157895819	157899410	2	157895819,157899308	157895889,157899410	174	+	157888233-157895818	157899411-157905833
4:80649246|80656699	0	0	0	1.67902	1.5665	0	0	1.08184	1.08184	0.392701	0.820938	exon	ENSOCUT00000010496	ENSOCUG00000010475	UTP20	UTP20, small subunit processome component	---	---	---	---	---	ENSOCUT00000010496	80649246	80656699	4	80649246,80651078,80652598,80656623	80649396,80651140,80652756,80656699	450	+	80644827-80649245	80656700-80658040
3:20692924|20697316	0	0	0	1.67902	0	2.29975	0	1.32626	1.32626	0.308178	0.820938	exon	ENSOCUT00000008425,ENSOCUT00000033600	ENSOCUG00000008421	KDM3B	lysine demethylase 3B	---	---	---	---	---	ENSOCUT00000008425	20692924	20697316	3	20692924,20696043,20697060	20693051,20696322,20697316	665	+	20687594-20692923	20697317-20700987
12:25683794|25747352	0	0	0	0	2.29975	2.29975	0	1.53317	1.53317	0.259149	0.820938	exon_intron	ENSOCUT00000005512	ENSOCUG00000005513	FKBP5	FK506 binding protein 5	---	---	---	---	---	ENSOCUT00000005512	25683794	25747352	2	25683794,25690013	25683938,25747352	57485	-	25668623-25683793	25747353-25754171
9:72948550|72980237	0	0	2.29975	1.67902	2.29975	3.4342	0.766583	2.47099	1.70441	0.476692	0.820938	exon	ENSOCUT00000013283	ENSOCUG00000013287	B4GALT6	beta-1,4-galactosyltransferase 6	---	---	---	---	---	ENSOCUT00000013283	72948550	72980237	4	72948550,72955622,72971194,72980121	72948666,72955746,72971307,72980237	473	-	72939228-72948549	72980238-73001318
13:133747387|133749458	2.78358	0	2.29975	0	1.5665	0	1.69444	0.522168	-1.17227	0.465664	0.820938	exon	ENSOCUT00000000268	ENSOCUG00000000264	UBR4	ubiquitin protein ligase E3 component n-recognin 4	---	---	---	---	---	ENSOCUT00000000268	133747387	133749458	4	133747387,133748118,133748279,133749231	133747578,133748188,133748426,133749458	639	+	133745674-133747386	133749459-133750602
13:1541391|1609410	0	0	0	1.67902	1.5665	0	0	1.08184	1.08184	0.392701	0.820938	exon	ENSOCUT00000008670	ENSOCUG00000008664	---	---	---	---	---	---	---	ENSOCUT00000008670	1541391	1609410	6	1541391,1542687,1572108,1577271,1580425,1609269	1541548,1542797,1572174,1577373,1580591,1609410	748	+	1531493-1541390	1609411-1609568
4:32995434|33003887	0	0	0	0	1.5665	1.5665	0	1.04434	1.04434	0.404744	0.820938	exon	ENSOCUT00000007380	ENSOCUG00000007379	KANSL2	KAT8 regulatory NSL complex subunit 2	---	---	---	---	---	ENSOCUT00000007380	32995434	33003887	3	32995434,33001892,33003721	32995687,33001988,33003887	518	-	32990033-32995433	33003888-33004451
3:74430691|74451762	0	0	0	1.67902	2.29975	0	0	1.32626	1.32626	0.308178	0.820938	exon	ENSOCUT00000005262	ENSOCUG00000005263	TOX	thymocyte selection associated high mobility group box	---	---	---	---	---	ENSOCUT00000005262	74430691	74451762	2	74430691,74451697	74430933,74451762	309	-	74341477-74430690	74451763-74624893
16:32499246|32514248	0	0	0	1.67902	1.5665	0	0	1.08184	1.08184	0.392701	0.820938	exon	ENSOCUT00000002884	ENSOCUG00000002867	LYST	lysosomal trafficking regulator	---	---	---	---	---	ENSOCUT00000002884	32499246	32514248	7	32499246,32500348,32500916,32510732,32510966,32512007,32514193	32499422,32500424,32501104,32510877,32511062,32512068,32514248	804	+	32492507-32499245	32514249-32520973
12:147203491|147239667	2.29975	1.5665	0	2.9272	2.78358	3.67482	1.28875	3.12853	1.83978	0.420047	0.820938	exon	ENSOCUT00000008888	ENSOCUG00000008879	ARID1B	AT-rich interaction domain 1B	---	---	---	---	---	ENSOCUT00000008888	147203491	147239667	2	147203491,147239557	147203640,147239667	261	+	147132523-147203490	147239668-147397395
17:29984412|29988833	0	0	0	0	1.5665	2.29975	0	1.28875	1.28875	0.315196	0.820938	exon	ENSOCUT00000026631,ENSOCUT00000011159	ENSOCUG00000011154	VPS39	VPS39, HOPS complex subunit	---	---	---	---	---	ENSOCUT00000011159	29984412	29988833	5	29984412,29984764,29987276,29988249,29988741	29984476,29984806,29987370,29988347,29988833	395	+	29977423-29984411	29988834-29992735
1:104513367|104523650	0	0	0	0	1.5665	1.5665	0	1.04434	1.04434	0.404744	0.820938	exon	ENSOCUT00000022546	ENSOCUG00000012966	---	---	---	---	---	---	---	ENSOCUT00000022546	104513367	104523650	5	104513367,104516755,104520181,104520878,104523521	104513489,104516909,104520310,104521025,104523650	686	+	104502707-104513366	104523651-104559128
3:101944906|101958154	0	0	0	1.67902	0	2.78358	0	1.48753	1.48753	0.257503	0.820938	exon	ENSOCUT00000030075	ENSOCUG00000001086	RMDN1	regulator of microtubule dynamics 1	---	---	---	---	---	ENSOCUT00000030075	101944906	101958154	4	101944906,101947994,101950368,101958037	101944995,101948153,101950455,101958154	456	-	101940955-101944905	101958155-101964117
9:10770324|10777458	2.29975	1.5665	0	0	0	0	1.28875	0	-1.28875	0.324028	0.820938	exon_intron	ENSOCUT00000013065	ENSOCUG00000013071	TMCC1	transmembrane and coiled-coil domain family 1	---	---	---	---	---	ENSOCUT00000013065	10770324	10777458	1	10770324	10777458	7135	+	---	10777459-10905119
1:102629758|102636223	1.5665	2.29975	0	0	0	0	1.28875	0	-1.28875	0.324028	0.820938	exon	ENSOCUT00000025267	ENSOCUG00000007436	ZW10	zw10 kinetochore protein	---	---	---	---	---	ENSOCUT00000025267	102629758	102636223	3	102629758,102632353,102635985	102629921,102632535,102636223	586	+	102624709-102629757	102636224-102639289
11:78374281|78375185	0	0	0	0	1.5665	1.5665	0	1.04434	1.04434	0.404744	0.820938	exon	ENSOCUT00000021575	ENSOCUG00000010466	KIF2A	kinesin family member 2A	---	---	---	---	---	ENSOCUT00000021575	78374281	78375185	2	78374281,78375043	78374372,78375185	235	+	78373272-78374280	78375186-78375884
12:94656557|94665111	0	1.5665	2.29975	0	0	0	1.28875	0	-1.28875	0.324028	0.820938	exon	ENSOCUT00000013372	ENSOCUG00000013366	CRYBG1	crystallin beta-gamma domain containing 1	---	---	---	---	---	ENSOCUT00000013372	94656557	94665111	4	94656557,94662889,94663024,94664946	94658771,94662936,94663142,94665111	2548	+	94651265-94656556	94665112-94668210
2:68630927|68645387	0	0	0	0	3.14526	0	0	1.04842	1.04842	0.327414	0.820938	exon_intron	ENSOCUT00000014589	ENSOCUG00000014589	---	---	---	---	---	---	---	ENSOCUT00000014589	68630927	68645387	4	68630927,68633472,68642146,68645243	68631136,68633665,68642307,68645387	711	+	---	68645388-68647251
8:18051314|18051770	0	0	0	2.43409	2.78358	0	0	1.73922	1.73922	0.215519	0.820938	exon	ENSOCUT00000013126	ENSOCUG00000013129	CMAS	cytidine monophosphate N-acetylneuraminic acid synthetase	---	---	---	---	---	ENSOCUT00000013126	18051314	18051770	2	18051314,18051628	18051469,18051770	299	-	18047864-18051313	18051771-18058587
13:5891451|5942362	1.5665	2.29975	0	0	0	0	1.28875	0	-1.28875	0.324028	0.820938	exon	ENSOCUT00000005161	ENSOCUG00000005161	RALGPS2	Ral GEF with PH domain and SH3 binding motif 2	---	---	---	---	---	ENSOCUT00000005161	5891451	5942362	7	5891451,5901871,5902219,5919919,5930640,5936962,5942236	5891590,5901975,5902269,5920002,5930729,5937054,5942362	690	+	---	5942363-5973584
8:97127664|97129712	0	0	0	0	1.5665	2.29975	0	1.28875	1.28875	0.315196	0.820938	exon	ENSOCUT00000014626	ENSOCUG00000014610	ABCC4	ATP binding cassette subfamily C member 4	---	---	---	---	---	ENSOCUT00000014626	97127664	97129712	2	97127664,97129587	97127913,97129712	376	-	97117454-97127663	97129713-97130841
18:61481906|61495778	0	0	0	0	1.5665	2.29975	0	1.28875	1.28875	0.315196	0.820938	exon	ENSOCUT00000004925	ENSOCUG00000004924	NHLRC2	NHL repeat containing 2	---	---	---	---	---	ENSOCUT00000004925	61481906	61495778	5	61481906,61490036,61490849,61492949,61495559	61482005,61490267,61490971,61493158,61495778	885	+	61471034-61481905	61495779-61500053
19:22067982|22080821	1.5665	0	1.5665	0	0	0	1.04434	0	-1.04434	0.415139	0.820938	exon	ENSOCUT00000008496	ENSOCUG00000008495	PSMD11	proteasome 26S subunit, non-ATPase 11	---	---	---	---	---	ENSOCUT00000008496	22067982	22080821	7	22067982,22074327,22075560,22077827,22079906,22080470,22080770	22068176,22074471,22075620,22077889,22080031,22080505,22080821	678	+	22063970-22067981	22080822-22081424
14:135821869|135826841	0	0	0	0	3.14526	0	0	1.04842	1.04842	0.327414	0.820938	exon	ENSOCUT00000005915	ENSOCUG00000005912	GBE1	1,4-alpha-glucan branching enzyme 1	---	---	---	---	---	ENSOCUT00000005915	135821869	135826841	3	135821869,135823699,135826751	135821994,135823834,135826841	353	+	135776848-135821868	135826842-135830917
14:35887863|35890790	2.29975	1.5665	0	0	0	0	1.28875	0	-1.28875	0.324028	0.820938	exon	ENSOCUT00000001886	ENSOCUG00000001874	ATR	ATR serine/threonine kinase	---	---	---	---	---	ENSOCUT00000001886	35887863	35890790	4	35887863,35888440,35890284,35890699	35888022,35888619,35890461,35890790	610	-	35884654-35887862	35890791-35894795
2:83843171|83845166	0	0	0	1.67902	0	2.29975	0	1.32626	1.32626	0.308178	0.820938	exon	ENSOCUT00000025407,ENSOCUT00000001168	ENSOCUG00000001165	---	---	---	---	---	---	---	ENSOCUT00000001168	83843171	83845166	3	83843171,83843357,83845020	83843254,83843536,83845166	411	-	83839195-83843170	83845167-83845575
12:118995991|119003439	0	0	0	0	2.78358	2.29975	0	1.69444	1.69444	0.22201	0.820938	exon	ENSOCUT00000009440	ENSOCUG00000009427	LAMA2	laminin subunit alpha 2	---	---	---	---	---	ENSOCUT00000009440	118995991	119003439	2	118995991,119003327	118996161,119003439	284	+	118812315-118995990	119003440-119034127
9:63124767|63133285	0	0	0	0	1.5665	1.5665	0	1.04434	1.04434	0.404744	0.820938	exon	ENSOCUT00000005762	ENSOCUG00000005755	MIB1	mindbomb E3 ubiquitin protein ligase 1	---	---	---	---	---	ENSOCUT00000005762	63124767	63133285	3	63124767,63128101,63133102	63124833,63128305,63133285	456	+	63119473-63124766	63133286-63147592
15:94133132|94146144	1.5665	1.5665	1.5665	0	0	0	1.5665	0	-1.5665	0.276971	0.820938	exon	ENSOCUT00000013279	ENSOCUG00000013272	SEC24D	SEC24 homolog D, COPII coat complex component	---	---	---	---	---	ENSOCUT00000013279	94133132	94146144	3	94133132,94145480,94145911	94133243,94145610,94146144	477	-	94118057-94133131	94146145-94147418
14:10527454|10676392	3.14526	0	0	0	0	0	1.04842	0	-1.04842	0.334534	0.820938	exon	ENSOCUT00000032118	ENSOCUG00000004532	THRB	thyroid hormone receptor beta	---	---	---	---	---	ENSOCUT00000032118	10527454	10676392	3	10527454,10561324,10676323	10527714,10561387,10676392	395	-	10483356-10527453	---
1:172675609|172676940	0	1.5665	2.29975	0	0	0	1.28875	0	-1.28875	0.324028	0.820938	exon	ENSOCUT00000020961	ENSOCUG00000001215	HIPK3	homeodomain interacting protein kinase 3	---	---	---	---	---	ENSOCUT00000020961	172675609	172676940	2	172675609,172676854	172675728,172676940	207	+	172666416-172675608	172676941-172677738
17:33682005|33684066	1.5665	0	2.29975	0	0	0	1.28875	0	-1.28875	0.324028	0.820938	exon	ENSOCUT00000001784,ENSOCUT00000025823	ENSOCUG00000001786	FAM98B	family with sequence similarity 98 member B	---	---	---	---	---	ENSOCUT00000001784	33682005	33684066	2	33682005,33683921	33682139,33684066	281	-	33676693-33682004	33684067-33695280
4:22909226|22930421	2.78358	3.4342	2.78358	2.9272	4.92732	5.10231	3.00045	4.31894	1.31849	0.452825	0.820938	exon	ENSOCUT00000001309	ENSOCUG00000001309	ISM1	isthmin 1	---	---	---	---	---	ENSOCUT00000001309	22909226	22930421	4	22909226,22912656,22920548,22930182	22909315,22912799,22920812,22930421	739	-	22902875-22909225	22930422-22979595
17:38371196|38373109	1.5665	1.5665	3.14526	1.67902	0	0	2.09276	0.559675	-1.53308	0.397794	0.820938	exon	ENSOCUT00000005602	ENSOCUG00000005597	FMN1	formin 1	---	---	---	---	---	ENSOCUT00000005602	38371196	38373109	1	38371196	38373109	1914	-	38282237-38371195	38373110-38403207
13:49586991|49595212	0	0	0	2.43409	0	1.5665	0	1.33353	1.33353	0.301396	0.820938	exon	ENSOCUT00000016792	ENSOCUG00000016789	DENND2C	DENN domain containing 2C	---	---	---	---	---	ENSOCUT00000016792	49586991	49595212	7	49586991,49587644,49588637,49589243,49591184,49594095,49595107	49587060,49587721,49588777,49589391,49591361,49594136,49595212	764	+	49584224-49586990	49595213-49598571
11:59998428|60003692	0	1.5665	1.5665	0	0	0	1.04434	0	-1.04434	0.415139	0.820938	exon	ENSOCUT00000028082,ENSOCUT00000012684	ENSOCUG00000012668	RICTOR	RPTOR independent companion of MTOR complex 2	---	---	---	---	---	ENSOCUT00000012684	59998428	60003692	8	59998428,59999149,59999388,59999902,60000497,60001073,60003426,60003591	59998506,59999225,59999552,60000028,60000696,60001208,60003472,60003692	933	-	59991767-59998427	60003693-60004634
13:14143527|14170428	0	0	0	2.43409	1.5665	0	0	1.33353	1.33353	0.301396	0.820938	exon	ENSOCUT00000000459	ENSOCUG00000000459	ACTR3B	ARP3 actin related protein 3 homolog B	---	---	---	---	---	ENSOCUT00000000459	14143527	14170428	7	14143527,14144873,14159188,14160811,14164600,14168738,14170336	14143651,14144983,14159283,14160918,14164743,14168911,14170428	851	+	14125467-14143526	14170429-14204393
7:119702057|119714626	0	0	0	0	1.5665	1.5665	0	1.04434	1.04434	0.404744	0.820938	exon	ENSOCUT00000002368	ENSOCUG00000002363	---	---	---	---	---	---	---	ENSOCUT00000002368	119702057	119714626	9	119702057,119702212,119702510,119707117,119709139,119709433,119712044,119713071,119714378	119702119,119702418,119702645,119707170,119709240,119709491,119712063,119713199,119714626	1019	-	119696979-119702056	119714627-119719334
3:40178563|40201036	1.5665	0	2.29975	0	0	0	1.28875	0	-1.28875	0.324028	0.820938	exon	ENSOCUT00000008988	ENSOCUG00000008985	EBF1	early B cell factor 1	---	---	---	---	---	ENSOCUT00000008988	40178563	40201036	2	40178563,40200906	40178689,40201036	258	-	40129971-40178562	40201037-40227161
12:70116544|70124376	1.5665	2.29975	0	0	0	0	1.28875	0	-1.28875	0.324028	0.820938	exon	ENSOCUT00000010788	ENSOCUG00000010777	DOPEY1	dopey family member 1	---	---	---	---	---	ENSOCUT00000010788	70116544	70124376	6	70116544,70116775,70119106,70121335,70123106,70124267	70116669,70116946,70119231,70121469,70123161,70124376	725	+	70115442-70116543	70124377-70125039
9:40899698|40902798	1.5665	0	1.5665	0	0	0	1.04434	0	-1.04434	0.415139	0.820938	exon	ENSOCUT00000033591,ENSOCUT00000007732	ENSOCUG00000007731	PDZRN3	PDZ domain containing ring finger 3	---	---	---	---	---	ENSOCUT00000007732	40899698	40902798	2	40899698,40902551	40899785,40902798	336	-	40887002-40899697	---
16:40959474|40960061	0	0	0	1.67902	1.5665	0	0	1.08184	1.08184	0.392701	0.820938	exon	ENSOCUT00000014480	ENSOCUG00000014482	PLXDC2	plexin domain containing 2	---	---	---	---	---	ENSOCUT00000014480	40959474	40960061	2	40959474,40959966	40959555,40960061	178	-	40928430-40959473	40960062-40974861
13:100997865|101000247	0	0	0	0	2.29975	1.5665	0	1.28875	1.28875	0.315196	0.820938	exon	ENSOCUT00000010022	ENSOCUG00000010020	DNAJC6	DnaJ heat shock protein family (Hsp40) member C6	---	---	---	---	---	ENSOCUT00000010022	100997865	101000247	3	100997865,100998904,101000114	100997982,100999098,101000247	447	-	100996199-100997864	101000248-101005366
19:43799952|43801754	2.29975	1.5665	0	0	0	0	1.28875	0	-1.28875	0.324028	0.820938	exon	ENSOCUT00000022220,ENSOCUT00000025487	ENSOCUG00000025171	NBR1	NBR1, autophagy cargo receptor	---	---	---	---	---	ENSOCUT00000022220	43799952	43801754	4	43799952,43800492,43801097,43801545	43800029,43800706,43801261,43801754	668	+	43799272-43799951	43801755-43804208
3:28086521|28114061	0	0	0	1.67902	1.5665	3.88098	0	2.3755	2.3755	0.107412	0.820938	exon	ENSOCUT00000015708	ENSOCUG00000015684	LARS	leucyl-tRNA synthetase	---	---	---	---	---	ENSOCUT00000015708	28086521	28114061	15	28086521,28087832,28091148,28091487,28093008,28094060,28096133,28100365,28104292,28106167,28107415,28108267,28108446,28108597,28113984	28086625,28087942,28091258,28091627,28093148,28094150,28096316,28100428,28104349,28106379,28107553,28108349,28108511,28108682,28114061	1671	-	28083531-28086520	28114062-28116115
14:80015807|80028412	0	0	0	0	1.5665	1.5665	0	1.04434	1.04434	0.404744	0.820938	exon	ENSOCUT00000034164,ENSOCUT00000005050	ENSOCUG00000005048	SENP2	SUMO1/sentrin/SMT3 specific peptidase 2	---	---	---	---	---	ENSOCUT00000005050	80015807	80028412	5	80015807,80019939,80025193,80027300,80028279	80015910,80020107,80025283,80027366,80028412	565	-	80012320-80015806	80028416-80031888
12:114656363|114665833	0	0	0	0	1.5665	2.29975	0	1.28875	1.28875	0.315196	0.820938	exon	ENSOCUT00000011862	ENSOCUG00000011863	HDDC2	HD domain containing 2	---	---	---	---	---	ENSOCUT00000011862	114656363	114665833	2	114656363,114665765	114656501,114665833	208	-	114652336-114656362	114665834-114673098
11:75112912|75151081	1.5665	2.29975	0	0	0	0	1.28875	0	-1.28875	0.324028	0.820938	exon	ENSOCUT00000011693	ENSOCUG00000011689	---	---	---	---	---	---	---	ENSOCUT00000011693	75112912	75151081	4	75112912,75117763,75126238,75150890	75112961,75117836,75126274,75151081	353	-	74965521-75112911	75151082-75270557
3:20814329|20820125	0	2.29975	1.5665	0	0	0	1.28875	0	-1.28875	0.324028	0.820938	exon	ENSOCUT00000006656	ENSOCUG00000006655	HSPA9	heat shock protein family A (Hsp70) member 9	---	---	---	---	---	ENSOCUT00000006656	20814329	20820125	7	20814329,20814731,20815496,20816194,20817304,20818409,20820033	20814421,20814825,20815613,20816298,20817531,20818618,20820125	942	-	20813483-20814328	20820126-20821088
12:119454563|119455536	0	0	0	0	1.5665	1.5665	0	1.04434	1.04434	0.404744	0.820938	exon	ENSOCUT00000009440	ENSOCUG00000009427	LAMA2	laminin subunit alpha 2	---	---	---	---	---	ENSOCUT00000009440	119454563	119455536	2	119454563,119455392	119454725,119455536	308	+	119448278-119454562	119455537-119465827
17:55416626|55438978	0	0	0	0	1.5665	1.5665	0	1.04434	1.04434	0.404744	0.820938	exon	ENSOCUT00000006817	ENSOCUG00000006807	RALGAPA1	Ral GTPase activating protein catalytic alpha subunit 1	---	---	---	---	---	ENSOCUT00000006817	55416626	55438978	6	55416626,55421500,55422148,55432461,55438026,55438868	55416741,55421677,55422191,55432518,55438075,55438978	557	-	55411056-55416625	55438979-55478694
15:3292130|3568064	0	0	0	1.67902	1.5665	0	0	1.08184	1.08184	0.392701	0.820938	exon	ENSOCUT00000025561	ENSOCUG00000022679	PSD3	pleckstrin and Sec7 domain containing 3	---	---	---	---	---	ENSOCUT00000025561	3292130	3568064	10	3292130,3326695,3355660,3464339,3490288,3493460,3496789,3496958,3563997,3566999	3292200,3326888,3355703,3464428,3490346,3493572,3496869,3497152,3564392,3568064	2309	-	3260116-3292129	3568065-3631108
3:56295952|56302318	0	0	0	0	1.5665	2.29975	0	1.28875	1.28875	0.315196	0.820938	exon	ENSOCUT00000004826	ENSOCUG00000004827	SFXN1	sideroflexin 1	---	---	---	---	---	ENSOCUT00000004826	56295952	56302318	5	56295952,56298811,56300320,56300905,56302191	56296122,56298909,56300395,56300990,56302318	560	+	56293862-56295951	56302319-56305926
3:84047178|84095024	0	0	0	0	2.29975	1.5665	0	1.28875	1.28875	0.315196	0.820938	exon	ENSOCUT00000001785	ENSOCUG00000001781	PREX2	phosphatidylinositol-3,4,5-trisphosphate dependent Rac exchange factor 2	---	---	---	---	---	ENSOCUT00000001785	84047178	84095024	4	84047178,84060285,84094530,84094834	84047321,84060399,84094596,84095024	517	+	84038350-84047177	84095025-84133078
1:26623808|26633365	2.29975	2.29975	0	0	0	0	1.53317	0	-1.53317	0.266927	0.820938	exon	ENSOCUT00000015473	ENSOCUG00000015471	PLAA	phospholipase A2 activating protein	---	---	---	---	---	ENSOCUT00000015473	26623808	26633365	5	26623808,26624441,26628333,26632262,26633146	26623975,26624576,26628502,26632419,26633365	852	+	26621946-26623807	26633366-26636712
7:104113723|104125074	2.29975	1.5665	3.4342	0	1.5665	1.5665	2.43348	1.04434	-1.38915	0.441453	0.820938	exon	ENSOCUT00000017276	ENSOCUG00000017272	COBLL1	cordon-bleu WH2 repeat protein like 1	---	---	---	---	---	ENSOCUT00000017276	104113723	104125074	4	104113723,104114071,104121719,104124873	104113959,104114168,104121947,104125074	766	-	104092359-104113722	104125075-104141718
X:98384951|98396565	0	1.5665	1.5665	0	0	0	1.04434	0	-1.04434	0.415139	0.820938	exon_intron	ENSOCUT00000009875	ENSOCUG00000009878	XIAP	---	---	---	---	---	---	ENSOCUT00000009875	98384951	98396565	5	98384951,98387409,98389003,98389667,98396365	98385859,98387508,98389081,98389709,98396565	1332	+	---	98396566-98405828
16:45772517|45785118	0	2.29975	1.5665	0	0	0	1.28875	0	-1.28875	0.324028	0.820938	exon	ENSOCUT00000014344	ENSOCUG00000014334	ITGA8	integrin subunit alpha 8	---	---	---	---	---	ENSOCUT00000014344	45772517	45785118	3	45772517,45782684,45784960	45772597,45782789,45785118	346	+	45766973-45772516	45785119-45797219
16:32734929|32784841	0	0	0	0	1.5665	1.5665	0	1.04434	1.04434	0.404744	0.820938	exon_intron	ENSOCUT00000023168	ENSOCUG00000017502	B3GALNT2	beta-1,3-N-acetylgalactosaminyltransferase 2	---	---	---	---	---	ENSOCUT00000023168	32734929	32784841	11	32734929,32741588,32745353,32754850,32764299,32768773,32777224,32780580,32781498,32782199,32784675	32735076,32741688,32745546,32754945,32764409,32768851,32777407,32780705,32781657,32782255,32784841	1423	+	32722261-32734917	32784842-32785699
13:78712005|78713371	0	1.5665	0	0	2.29975	3.4342	0.522168	1.91132	1.38915	0.376285	0.820938	exon	ENSOCUT00000003936	ENSOCUG00000003917	COL24A1	collagen type XXIV alpha 1 chain	---	---	---	---	---	ENSOCUT00000003936	78712005	78713371	1	78712005	78713371	1367	+	78687342-78712004	78713372-78725469
15:13958702|14140567	0	1.5665	1.5665	0	0	0	1.04434	0	-1.04434	0.415139	0.820938	exon	ENSOCUT00000021781	ENSOCUG00000022271	---	---	---	---	---	---	---	ENSOCUT00000021781	13958702	14140567	18	13958702,13961903,13968599,13973198,13997313,13998463,14017880,14088625,14090566,14092034,14102852,14105257,14115645,14121235,14123220,14127559,14133536,14140400	13958819,13962005,13968714,13973310,13997453,13998582,14018032,14088792,14090585,14092042,14102867,14105274,14115734,14121431,14123224,14127621,14133691,14140567	1774	+	13873321-13958701	14140568-14156753
12:135211892|135214872	1.5665	1.5665	2.78358	0	0	1.5665	1.9722	0.522168	-1.45003	0.423528	0.820938	exon	ENSOCUT00000015107	ENSOCUG00000015080	UTRN	utrophin	---	---	---	---	---	ENSOCUT00000015107	135211892	135214872	3	135211892,135214262,135214702	135212071,135214390,135214872	480	+	135205647-135211891	135214873-135217513
20:24397736|24603541	1.5665	1.5665	0	0	0	0	1.04434	0	-1.04434	0.415139	0.820938	exon	ENSOCUT00000004028	ENSOCUG00000004026	CEP128	centrosomal protein 128	---	---	---	---	---	ENSOCUT00000004028	24397736	24603541	17	24397736,24399881,24420958,24422448,24425614,24429415,24447914,24481854,24486635,24488287,24492853,24540072,24549705,24557271,24580750,24583757,24603349	24397897,24399967,24421084,24422566,24425705,24429487,24448030,24481940,24486709,24488419,24493004,24540422,24550355,24557435,24580926,24583816,24603541	2821	+	24365374-24397735	24603542-24759498
12:142431329|142433812	1.5665	1.5665	0	0	0	0	1.04434	0	-1.04434	0.415139	0.820938	exon	ENSOCUT00000033956	ENSOCUG00000023878	SYNE1	spectrin repeat containing nuclear envelope protein 1	---	---	---	---	---	ENSOCUT00000033956	142431329	142433812	2	142431329,142433640	142431482,142433812	327	-	142428078-142431328	142433813-142436042
13:6931540|6941121	0	0	0	1.67902	0	2.78358	0	1.48753	1.48753	0.257503	0.820938	exon	ENSOCUT00000015512	ENSOCUG00000015514	TOR1AIP1	torsin 1A interacting protein 1	---	---	---	---	---	ENSOCUT00000015512	6931540	6941121	5	6931540,6932390,6937784,6940556,6941053	6931581,6932476,6937840,6940597,6941121	297	+	6922990-6931539	6941122-6945051
7:63050668|63058107	0	0	0	1.67902	0	2.29975	0	1.32626	1.32626	0.308178	0.820938	exon	ENSOCUT00000008372	ENSOCUG00000008364	PTPN4	protein tyrosine phosphatase, non-receptor type 4	---	---	---	---	---	ENSOCUT00000008372	63050668	63058107	5	63050668,63053904,63056107,63056249,63057941	63050796,63054050,63056168,63056339,63058107	596	-	63047712-63050667	63058108-63063527
7:73424240|73425778	1.5665	1.5665	0	0	0	0	1.04434	0	-1.04434	0.415139	0.820938	exon	ENSOCUT00000016547	ENSOCUG00000016538	MCM6	minichromosome maintenance complex component 6	---	---	---	---	---	ENSOCUT00000016547	73424240	73425778	2	73424240,73425668	73424489,73425778	361	-	73418923-73424239	73425779-73428354
1:138843921|138851133	0	0	0	2.43409	1.5665	0	0	1.33353	1.33353	0.301396	0.820938	exon	ENSOCUT00000010645	ENSOCUG00000010638	INTS4	integrator complex subunit 4	---	---	---	---	---	ENSOCUT00000010645	138843921	138851133	3	138843921,138847705,138851003	138844014,138847785,138851133	306	+	138830984-138843920	138851134-138854628
12:88550381|88587115	0	0	0	2.43409	1.5665	0	0	1.33353	1.33353	0.301396	0.820938	exon	ENSOCUT00000002774	ENSOCUG00000002766	ASCC3	activating signal cointegrator 1 complex subunit 3	---	---	---	---	---	ENSOCUT00000002774	88550381	88587115	5	88550381,88550978,88585339,88586037,88586908	88550521,88551178,88585464,88586178,88587115	818	-	88519868-88550380	88587116-88593216
15:93406520|93408343	3.14526	0	1.5665	1.67902	0	0	1.57059	0.559675	-1.01091	0.494961	0.820938	exon	ENSOCUT00000013473	ENSOCUG00000013475	TMEM165	transmembrane protein 165	---	---	---	---	---	ENSOCUT00000013473	93406520	93408343	3	93406520,93407625,93408168	93406625,93407804,93408343	462	-	93405849-93406519	93408344-93414624
13:126651255|126663811	1.5665	0	1.5665	0	0	0	1.04434	0	-1.04434	0.415139	0.820938	exon	ENSOCUT00000002053	ENSOCUG00000002054	TRIT1	tRNA isopentenyltransferase 1	---	---	---	---	---	ENSOCUT00000002053	126651255	126663811	4	126651255,126659824,126660624,126663669	126651395,126659922,126660769,126663811	529	+	126629911-126651254	126663812-126668210
17:56961372|57049978	0	0	1.5665	2.43409	1.5665	1.5665	0.522168	1.8557	1.33353	0.469889	0.820938	exon	ENSOCUT00000003201	ENSOCUG00000003198	MIPOL1	mirror-image polydactyly 1	---	---	---	---	---	ENSOCUT00000003201	56961372	57049978	7	56961372,56963880,56965334,56982588,57000693,57000986,57049871	56961603,56964015,56965439,56982717,57000726,57001156,57049978	917	+	56940802-56961371	57049979-57129350
4:51713718|51729403	0	0	0	1.67902	1.5665	0	0	1.08184	1.08184	0.392701	0.820938	exon	ENSOCUT00000013315	ENSOCUG00000013309	TRHDE	thyrotropin releasing hormone degrading enzyme	---	---	---	---	---	ENSOCUT00000013315	51713718	51729403	5	51713718,51714421,51720471,51729117,51729348	51713783,51714608,51720559,51729250,51729403	533	+	51688908-51713717	51729404-51786842
1:130746068|130761646	0	0	0	0	1.5665	1.5665	0	1.04434	1.04434	0.404744	0.820938	exon	ENSOCUT00000022875	ENSOCUG00000023809	PICALM	phosphatidylinositol binding clathrin assembly protein	---	---	---	---	---	ENSOCUT00000022875	130746068	130761646	8	130746068,130748859,130751164,130753111,130758312,130761133,130761177,130761510	130746161,130748970,130751270,130753152,130758397,130761175,130761257,130761646	702	+	130742703-130746067	130761647-130763813
13:3226743|3233511	0	0	0	0	1.5665	2.29975	0	1.28875	1.28875	0.315196	0.820938	exon_intron	ENSOCUT00000005468	ENSOCUG00000005463	COP1	COP1, E3 ubiquitin ligase	---	---	---	---	---	ENSOCUT00000005468	3226743	3233511	2	3226743,3228211	3226819,3233511	5378	-	3213298-3226742	3233512-3241029
18:58520222|58526621	3.4342	1.5665	0	1.67902	0	0	1.6669	0.559675	-1.10723	0.445607	0.820938	exon	ENSOCUT00000016823	ENSOCUG00000016822	PDCD4	programmed cell death 4	---	---	---	---	---	ENSOCUT00000016823	58520222	58526621	5	58520222,58522044,58523208,58526172,58526511	58520443,58522141,58523322,58526279,58526621	654	+	58517618-58520221	58526622-58528678
13:51489834|51503243	0	0	0	1.67902	0	2.78358	0	1.48753	1.48753	0.257503	0.820938	exon	ENSOCUT00000000269	ENSOCUG00000000270	---	---	---	---	---	---	---	ENSOCUT00000000269	51489834	51503243	6	51489834,51499568,51500234,51501712,51502364,51503180	51489905,51499646,51500313,51501713,51502571,51503243	505	-	51487041-51489833	51503244-51506050
2:59975390|59999139	0	0	0	0	1.5665	1.5665	0	1.04434	1.04434	0.404744	0.820938	exon	ENSOCUT00000007614,ENSOCUT00000027406	ENSOCUG00000007616	---	---	---	---	---	---	---	ENSOCUT00000007614	59975390	59999139	2	59975390,59998901	59975627,59999139	477	+	59809366-59975389	59999140-60026293
6:27372533|27394711	0	1.5665	1.5665	0	0	0	1.04434	0	-1.04434	0.415139	0.820938	exon	ENSOCUT00000014390	ENSOCUG00000014388	ZCWPW1	zinc finger CW-type and PWWP domain containing 1	---	---	---	---	---	ENSOCUT00000014390	27372533	27394711	15	27372533,27373185,27374996,27375798,27376163,27384616,27385459,27387284,27388766,27391154,27392447,27392912,27393368,27394005,27394552	27372795,27373263,27375119,27375955,27376285,27384732,27385579,27387359,27388870,27391237,27392513,27392950,27393401,27394092,27394711	1638	+	27371730-27372532	27394712-27396303
9:6022254|6028172	0	1.5665	1.5665	0	0	0	1.04434	0	-1.04434	0.415139	0.820938	exon	ENSOCUT00000027279	ENSOCUG00000008144	CHCHD6	coiled-coil-helix-coiled-coil-helix domain containing 6	---	---	---	---	---	ENSOCUT00000027279	6022254	6028172	3	6022254,6026101,6028028	6022374,6026170,6028172	336	+	5996900-6022253	6028173-6131786
17:28883281|28884278	1.5665	0	1.5665	2.43409	3.14526	2.29975	1.04434	2.62637	1.58203	0.424348	0.820938	exon	ENSOCUT00000017325	ENSOCUG00000017326	TUBGCP4	gamma-tubulin complex component 4	---	---	---	---	---	ENSOCUT00000017325	28883281	28884278	3	28883281,28883729,28884156	28883337,28883782,28884278	234	-	28879159-28883280	28884279-28887755
18:39482409|39486837	0	0	0	0	2.78358	1.5665	0	1.45003	1.45003	0.261483	0.820938	exon	ENSOCUT00000015038	ENSOCUG00000015035	HECTD2	HECT domain E3 ubiquitin protein ligase 2	---	---	---	---	---	ENSOCUT00000015038	39482409	39486837	5	39482409,39483192,39483362,39485421,39486694	39482483,39483279,39483468,39485536,39486837	530	+	39481095-39482408	39486838-39493058
1:63608938|63620907	1.5665	1.5665	0	0	0	0	1.04434	0	-1.04434	0.415139	0.820938	exon	ENSOCUT00000001333	ENSOCUG00000001328	VPS13A	vacuolar protein sorting 13 homolog A	---	---	---	---	---	ENSOCUT00000001333	63608938	63620907	4	63608938,63614455,63620101,63620806	63608981,63614497,63620196,63620907	285	+	63591055-63608937	63620908-63625545
13:1298370|1302340	0	0	0	0	1.5665	1.5665	0	1.04434	1.04434	0.404744	0.820938	exon	ENSOCUT00000004933	ENSOCUG00000004930	RC3H1	ring finger and CCCH-type domains 1	---	---	---	---	---	ENSOCUT00000004933	1298370	1302340	3	1298370,1300119,1302208	1298482,1300237,1302340	365	-	1295344-1298369	1302341-1305129
13:111847184|111849143	0	3.4342	2.29975	0	0	1.5665	1.91132	0.522168	-1.38915	0.379248	0.820938	exon	ENSOCUT00000015635	ENSOCUG00000015591	USP24	ubiquitin specific peptidase 24	---	---	---	---	---	ENSOCUT00000015635	111847184	111849143	3	111847184,111848361,111848985	111847249,111848435,111849143	300	+	111841821-111847183	111849144-111850624
2:112645048|112648435	1.5665	0	0	2.43409	2.29975	1.5665	0.522168	2.10011	1.57795	0.404548	0.820938	exon	ENSOCUT00000003657	ENSOCUG00000003657	STAMBP	STAM binding protein	---	---	---	---	---	ENSOCUT00000003657	112645048	112648435	3	112645048,112647538,112648360	112645414,112647633,112648435	539	-	112636452-112645047	112648436-112662441
12:110394322|110413103	2.29975	2.29975	1.5665	0	0	0	2.05533	0	-2.05533	0.182249	0.820938	exon	ENSOCUT00000013959	ENSOCUG00000013938	TBC1D32	TBC1 domain family member 32	---	---	---	---	---	ENSOCUT00000013959	110394322	110413103	4	110394322,110397684,110405310,110412942	110394447,110397752,110405487,110413103	535	-	110384346-110394321	110413104-110434142
7:143786603|143799363	1.5665	0	0	1.67902	2.29975	2.29975	0.522168	2.09284	1.57067	0.410451	0.820938	exon	ENSOCUT00000008715	ENSOCUG00000008716	---	---	---	---	---	---	---	ENSOCUT00000008715	143786603	143799363	8	143786603,143788640,143792144,143796022,143797732,143798320,143798583,143799207	143786906,143788725,143792233,143796190,143797865,143798479,143798685,143799363	1203	+	143785401-143786602	143799364-143801733
14:120327026|120341978	1.5665	1.5665	0	0	0	0	1.04434	0	-1.04434	0.415139	0.820938	exon	ENSOCUT00000017705	ENSOCUG00000017704	TBC1D23	TBC1 domain family member 23	---	---	---	---	---	ENSOCUT00000017705	120327026	120341978	4	120327026,120334726,120337774,120341808	120327165,120334835,120337816,120341978	464	-	120325079-120327025	120341979-120345440
14:10306253|10306516	2.29975	0	2.78358	0	0	1.5665	1.69444	0.522168	-1.17227	0.465664	0.820938	exon	ENSOCUT00000009330	ENSOCUG00000009329	NR1D2	nuclear receptor subfamily 1 group D member 2	---	---	---	---	---	ENSOCUT00000009330	10306253	10306516	1	10306253	10306516	264	+	---	10306517-10307227
16:20710764|20718953	2.78358	0	2.29975	0	1.5665	0	1.69444	0.522168	-1.17227	0.465664	0.820938	exon	ENSOCUT00000014516	ENSOCUG00000014500	AHCTF1	AT-hook containing transcription factor 1	---	---	---	---	---	ENSOCUT00000014516	20710764	20718953	3	20710764,20713084,20718773	20710891,20713337,20718953	563	+	20701636-20710763	20718954-20723214
3:86097444|86132007	2.29975	0	2.29975	0	0	0	1.53317	0	-1.53317	0.266927	0.820938	exon_intron	ENSOCUT00000005974	ENSOCUG00000005967	NCOA2	nuclear receptor coactivator 2	---	---	---	---	---	ENSOCUT00000005974	86097444	86132007	2	86097444,86099438	86097616,86132007	32743	-	86056391-86097443	---
9:25608161|25609094	0	0	0	0	0	3.14526	0	1.04842	1.04842	0.327414	0.820938	exon	ENSOCUT00000002773	ENSOCUG00000002773	C3orf67	chromosome 3 open reading frame 67	---	---	---	---	---	ENSOCUT00000002773	25608161	25609094	2	25608161,25608958	25608323,25609094	300	-	25600191-25608160	25609095-25625521
8:29051930|29054459	0	0	0	0	2.78358	1.5665	0	1.45003	1.45003	0.261483	0.820938	exon	ENSOCUT00000014611	ENSOCUG00000014612	ITFG2	integrin alpha FG-GAP repeat containing 2	---	---	---	---	---	ENSOCUT00000014611	29051930	29054459	6	29051930,29052532,29053027,29053315,29053462,29054342	29052069,29052680,29053124,29053368,29053553,29054459	651	+	29050516-29051929	29054460-29055910
3:17995782|18005024	0	1.5665	1.5665	0	0	0	1.04434	0	-1.04434	0.415139	0.820938	exon	ENSOCUT00000008934	ENSOCUG00000008936	H2AFY	H2A histone family member Y	---	---	---	---	---	ENSOCUT00000008934	17995782	18005024	3	17995782,18004347,18004918	17995889,18004544,18005024	413	-	17987639-17995781	18005025-18028010
3:89396639|89421117	0	0	0	1.67902	1.5665	1.5665	0	1.60401	1.60401	0.261302	0.820938	exon	ENSOCUT00000013844	ENSOCUG00000013843	STAU2	staufen double-stranded RNA binding protein 2	---	---	---	---	---	ENSOCUT00000013844	89396639	89421117	5	89396639,89407886,89416818,89419329,89420958	89396770,89408023,89417030,89419436,89421117	751	-	89374722-89396638	89421118-89467281
18:58511973|58520443	1.5665	1.5665	0	0	0	0	1.04434	0	-1.04434	0.415139	0.820938	exon	ENSOCUT00000016823	ENSOCUG00000016822	PDCD4	programmed cell death 4	---	---	---	---	---	ENSOCUT00000016823	58511973	58520443	4	58511973,58514082,58517504,58520222	58512275,58514176,58517617,58520443	734	+	58503566-58511972	58520444-58522043
10:25011179|25037333	1.5665	1.5665	0	0	0	0	1.04434	0	-1.04434	0.415139	0.820938	exon	ENSOCUT00000006566	ENSOCUG00000006563	GLI3	GLI family zinc finger 3	---	---	---	---	---	ENSOCUT00000006566	25011179	25037333	6	25011179,25013271,25014248,25029382,25034002,25037131	25011319,25013384,25014461,25029583,25034148,25037333	1021	-	24965025-25011178	25037334-25066879
2:148260553|148301118	0	1.5665	1.5665	1.67902	2.29975	3.4342	1.04434	2.47099	1.42666	0.433949	0.820938	exon	ENSOCUT00000026241	ENSOCUG00000021847	---	---	---	---	---	---	---	ENSOCUT00000026241	148260553	148301118	8	148260553,148260724,148267788,148269787,148270752,148288804,148300154,148300944	148260633,148260777,148267886,148269864,148270827,148288864,148300256,148301118	727	-	148248001-148260552	148301119-148323302
19:11939626|11940437	0	0	0	0	2.78358	2.29975	0	1.69444	1.69444	0.22201	0.820938	exon	ENSOCUT00000029758,ENSOCUT00000021620	ENSOCUG00000025772	DLG4	discs large MAGUK scaffold protein 4	---	---	---	---	---	ENSOCUT00000021620	11939626	11940437	3	11939626,11940092,11940323	11939921,11940194,11940437	514	+	11934247-11939625	11940438-11942374
12:145053079|145075797	0	0	0	1.67902	2.29975	0	0	1.32626	1.32626	0.308178	0.820938	exon	ENSOCUT00000023944	ENSOCUG00000026063	SCAF8	SR-related CTD associated factor 8	---	---	---	---	---	ENSOCUT00000023944	145053079	145075797	11	145053079,145053445,145056100,145059179,145061563,145063892,145065859,145068316,145070602,145072142,145074324	145053210,145053557,145056293,145059279,145061676,145064048,145065992,145068460,145070670,145072360,145075797	2852	+	145047844-145053078	145075798-145137059
17:56961372|56982717	0	0	0	2.9272	2.29975	1.5665	0	2.26448	2.26448	0.143479	0.820938	exon	ENSOCUT00000003201	ENSOCUG00000003198	MIPOL1	mirror-image polydactyly 1	---	---	---	---	---	ENSOCUT00000003201	56961372	56982717	4	56961372,56963880,56965334,56982588	56961603,56964015,56965439,56982717	604	+	56940802-56961371	56982718-57000692
X:94973521|94979591	0	0	0	0	1.5665	1.5665	0	1.04434	1.04434	0.404744	0.820938	exon	ENSOCUT00000015646	ENSOCUG00000015633	CUL4B	cullin 4B	---	---	---	---	---	ENSOCUT00000015646	94973521	94979591	8	94973521,94975191,94976206,94976581,94976813,94977746,94978967,94979488	94973639,94975258,94976288,94976670,94976975,94977819,94979036,94979591	771	-	94972248-94973520	94979592-94991052
9:1643756|1649695	0	1.5665	2.78358	0	0	0	1.45003	0	-1.45003	0.271531	0.820938	exon	ENSOCUT00000013135	ENSOCUG00000013128	NKTR	natural killer cell triggering receptor	---	---	---	---	---	ENSOCUT00000013135	1643756	1649695	3	1643756,1648893,1649608	1646644,1649038,1649695	3123	-	1640606-1643755	1649696-1653320
19:3174833|3181713	1.5665	1.5665	0	1.67902	3.14526	3.14526	1.04434	2.65651	1.61218	0.394816	0.820938	exon	ENSOCUT00000013393	ENSOCUG00000013388	ULK2	unc-51 like autophagy activating kinase 2	---	---	---	---	---	ENSOCUT00000013393	3174833	3181713	5	3174833,3176803,3177893,3180022,3181540	3174915,3176861,3177994,3180095,3181713	492	-	3164999-3174832	3181714-3185016
1:13158268|13169895	2.29975	1.5665	1.5665	0	0	0	1.81092	0	-1.81092	0.22087	0.820938	exon	ENSOCUT00000004225	ENSOCUG00000004220	ERP44	endoplasmic reticulum protein 44	---	---	---	---	---	ENSOCUT00000004225	13158268	13169895	4	13158268,13159617,13165633,13169779	13158452,13159732,13165690,13169895	476	+	13137585-13158267	13169896-13175178
12:127103724|127144218	0	2.78358	1.5665	0	0	0	1.45003	0	-1.45003	0.271531	0.820938	exon	ENSOCUT00000015446	ENSOCUG00000015434	MAP3K5	mitogen-activated protein kinase kinase kinase 5	---	---	---	---	---	ENSOCUT00000015446	127103724	127144218	12	127103724,127113317,127113836,127122579,127128732,127130567,127139740,127139962,127141386,127141495,127142957,127144025	127103883,127113429,127113850,127122616,127128779,127130572,127139772,127139986,127141388,127141601,127143125,127144218	911	-	127101638-127103723	127144219-127151543
13:67751171|67762723	2.29975	1.5665	0	3.29403	4.06133	3.88098	1.28875	3.74545	2.4567	0.284382	0.820938	exon	ENSOCUT00000017609	ENSOCUG00000017608	PTBP2	polypyrimidine tract binding protein 2	---	---	---	---	---	ENSOCUT00000017609	67751171	67762723	5	67751171,67756883,67757084,67761626,67762551	67751366,67756993,67757248,67761769,67762723	789	-	67737450-67751170	67762724-67785017
2:16979950|16986442	0	0	0	0	1.5665	1.5665	0	1.04434	1.04434	0.404744	0.820938	exon	ENSOCUT00000013468	ENSOCUG00000013465	TBC1D19	TBC1 domain family member 19	---	---	---	---	---	ENSOCUT00000013468	16979950	16986442	4	16979950,16984754,16985376,16986396	16980025,16984828,16985439,16986442	262	+	16974727-16979949	16986443-16992464
10:14960373|14961716	0	1.5665	1.5665	0	0	0	1.04434	0	-1.04434	0.415139	0.820938	exon	ENSOCUT00000005294	ENSOCUG00000005295	GARS	glycyl-tRNA synthetase	---	---	---	---	---	ENSOCUT00000005294	14960373	14961716	2	14960373,14961552	14960535,14961716	328	+	14957333-14960372	14961717-14963544
14:158377860|158400228	2.78358	1.5665	0	0	0	0	1.45003	0	-1.45003	0.271531	0.820938	exon	ENSOCUT00000034105,ENSOCUT00000007781	ENSOCUG00000007779	USP16	ubiquitin specific peptidase 16	---	---	---	---	---	ENSOCUT00000007781	158377860	158400228	14	158377860,158383531,158385120,158386120,158386805,158387966,158388404,158390482,158392167,158393838,158395966,158397035,158399134,158400142	158378038,158383634,158385223,158386307,158386900,158388096,158388491,158390560,158392258,158393894,158396142,158397698,158399231,158400228	2144	+	158374670-158377859	158400229-158409040
19:29552488|29568419	0	0	0	1.67902	2.29975	0	0	1.32626	1.32626	0.308178	0.820938	exon	ENSOCUT00000002269	ENSOCUG00000002269	---	---	---	---	---	---	---	ENSOCUT00000002269	29552488	29568419	4	29552488,29554285,29564929,29568289	29552548,29554351,29565060,29568419	391	-	29541978-29552487	29568420-29573701
3:14634316|14637902	0	0	0	1.67902	1.5665	0	0	1.08184	1.08184	0.392701	0.820938	exon	ENSOCUT00000003850	ENSOCUG00000003847	---	---	---	---	---	---	---	ENSOCUT00000003850	14634316	14637902	2	14634316,14637662	14634699,14637902	625	-	14624762-14634315	14637903-14646768
4:81107816|81115080	1.5665	0	1.5665	0	0	0	1.04434	0	-1.04434	0.415139	0.820938	exon	ENSOCUT00000009301	ENSOCUG00000009299	GNPTAB	N-acetylglucosamine-1-phosphate transferase alpha and beta subunits	---	---	---	---	---	ENSOCUT00000009301	81107816	81115080	3	81107816,81108374,81114875	81107950,81108438,81115080	406	-	81095457-81107815	81115081-81117429
11:59917809|59919316	0	0	0	0	1.5665	1.5665	0	1.04434	1.04434	0.404744	0.820938	exon	ENSOCUT00000012653	ENSOCUG00000012643	OSMR	oncostatin M receptor	---	---	---	---	---	ENSOCUT00000012653	59917809	59919316	2	59917809,59919181	59918081,59919316	409	+	59914381-59917808	59919317-59920534
8:2540134|2548167	0	0	0	0	3.14526	2.78358	0	1.97628	1.97628	0.17816	0.820938	exon	ENSOCUT00000004105	ENSOCUG00000004103	IRAK4	interleukin 1 receptor associated kinase 4	---	---	---	---	---	ENSOCUT00000004105	2540134	2548167	6	2540134,2542522,2544161,2545220,2546217,2547998	2540248,2542586,2544321,2545402,2546362,2548167	840	-	2539312-2540133	---
X:50020895|50022475	0	0	0	1.67902	1.5665	0	0	1.08184	1.08184	0.392701	0.820938	exon	ENSOCUT00000016973	ENSOCUG00000016965	OGT	UDP-N-acetylglucosamine--peptide N-acetylglucosaminyltransferase 110 kDa subunit	---	---	---	---	---	ENSOCUT00000016973	50020895	50022475	3	50020895,50022075,50022386	50021074,50022233,50022475	429	+	50020340-50020894	50022476-50026939
11:85509728|85510069	3.4342	1.5665	3.14526	1.67902	0	1.5665	2.71532	1.08184	-1.63348	0.385343	0.820938	exon	ENSOCUT00000007527	ENSOCUG00000007527	CCDC125	coiled-coil domain containing 125	---	---	---	---	---	ENSOCUT00000007527	85509728	85510069	1	85509728	85510069	342	-	85503522-85509727	---
15:87554365|87622491	1.5665	0	1.5665	0	0	0	1.04434	0	-1.04434	0.415139	0.820938	exon	ENSOCUT00000001916	ENSOCUG00000001910	ADGRL3	adhesion G protein-coupled receptor L3	---	---	---	---	---	ENSOCUT00000001916	87554365	87622491	2	87554365,87622291	87554578,87622491	415	-	87447911-87554364	87622492-87638886
7:141248495|141262118	0	0	0	0	4.06133	2.29975	0	2.12036	2.12036	0.171209	0.820938	exon	ENSOCUT00000013986	ENSOCUG00000013971	AOX1	aldehyde oxidase 1	---	---	---	---	---	ENSOCUT00000013986	141248495	141262118	5	141248495,141248975,141251386,141255324,141261994	141248664,141249089,141251508,141255420,141262118	630	+	141244370-141248494	141262119-141266860
17:7779842|7797062	0	3.14526	0	0	0	0	1.04842	0	-1.04842	0.334534	0.820938	exon	ENSOCUT00000002321	ENSOCUG00000002322	TRIP4	thyroid hormone receptor interactor 4	---	---	---	---	---	ENSOCUT00000002321	7779842	7797062	3	7779842,7795129,7796938	7779944,7795220,7797062	320	-	7770416-7779841	7797063-7800747
2:91106410|91111637	0	0	1.5665	0	3.4342	2.78358	0.522168	2.07259	1.55043	0.343772	0.820938	exon	ENSOCUT00000013058	ENSOCUG00000013058	RNF149	ring finger protein 149	---	---	---	---	---	ENSOCUT00000013058	91106410	91111637	3	91106410,91107418,91111555	91106660,91107486,91111637	403	+	91104145-91106407	91111638-91115019
7:157577437|157602152	0	0	0	0	1.5665	2.78358	0	1.45003	1.45003	0.261483	0.820938	exon	ENSOCUT00000006644	ENSOCUG00000006642	XRCC5	X-ray repair cross complementing 5	---	---	---	---	---	ENSOCUT00000006644	157577437	157602152	3	157577437,157600815,157602083	157577633,157600908,157602152	361	+	157568610-157577436	157602153-157629582
1:26628333|26633365	0	0	0	1.67902	1.5665	1.5665	0	1.60401	1.60401	0.261302	0.820938	exon	ENSOCUT00000015473	ENSOCUG00000015471	PLAA	phospholipase A2 activating protein	---	---	---	---	---	ENSOCUT00000015473	26628333	26633365	3	26628333,26632262,26633146	26628502,26632419,26633365	548	+	26624577-26628332	26633366-26636712
19:21788582|21803365	0	0	1.5665	0	3.14526	1.5665	0.522168	1.57059	1.04842	0.465489	0.820938	exon	ENSOCUT00000012511	ENSOCUG00000012506	RHOT1	ras homolog family member T1	---	---	---	---	---	ENSOCUT00000012511	21788582	21803365	5	21788582,21790656,21791604,21791814,21803257	21788663,21790699,21791657,21791866,21803365	342	+	21785556-21788581	21803366-21804015
12:65914939|65915285	0	0	0	2.9272	1.5665	0	0	1.4979	1.4979	0.258348	0.820938	exon	ENSOCUT00000016415	ENSOCUG00000016401	PHIP	pleckstrin homology domain interacting protein	---	---	---	---	---	ENSOCUT00000016415	65914939	65915285	2	65914939,65915135	65915037,65915285	250	-	65894302-65914938	---
8:30605110|30613253	0	5.25834	5.25834	3.58623	1.5665	1.5665	3.50556	2.23975	-1.26582	0.38147	0.820938	exon	ENSOCUT00000001957	ENSOCUG00000001956	C12orf4	chromosome 12 open reading frame 4	---	---	---	---	---	ENSOCUT00000001957	30605110	30613253	5	30605110,30606755,30607294,30612938,30613154	30605238,30606952,30607400,30613059,30613253	656	-	30597067-30605109	30613254-30618539
17:76794022|76823235	1.5665	0	2.78358	0	0	0	1.45003	0	-1.45003	0.271531	0.820938	exon	ENSOCUT00000007146	ENSOCUG00000007145	KIAA0586	KIAA0586	---	---	---	---	---	ENSOCUT00000007146	76794022	76823235	12	76794022,76798048,76799399,76801454,76804110,76807484,76811945,76813212,76815716,76818615,76821867,76823058	76794209,76798152,76799479,76801647,76804228,76807683,76812101,76813446,76815969,76818691,76822001,76823235	1923	+	76792204-76794021	76823236-76836040
3:82984704|83001465	3.14526	0	1.5665	0	1.5665	0	1.57059	0.522168	-1.04842	0.468757	0.820938	exon	ENSOCUT00000015850	ENSOCUG00000015847	CSPP1	centrosome and spindle pole associated protein 1	---	---	---	---	---	ENSOCUT00000015850	82984704	83001465	12	82984704,82988347,82988476,82993671,82993795,82993989,82995039,82995564,82995651,82998833,83000725,83001351	82984856,82988459,82988521,82993675,82993832,82994033,82995057,82995599,82995710,82998937,83000791,83001465	802	+	82973189-82984703	83001466-83004900
17:54390542|54429158	1.5665	0	1.5665	0	0	0	1.04434	0	-1.04434	0.415139	0.820938	exon_intron	ENSOCUT00000033341	ENSOCUG00000029421	SNX6	sorting nexin 6	---	---	---	---	---	ENSOCUT00000033341	54390542	54429158	7	54390542,54395830,54398887,54405241,54408492,54422557,54424843	54390628,54395869,54398962,54405346,54408587,54422680,54429158	4845	-	54387942-54390541	---
15:82024157|82036796	0	0	0	0	2.29975	1.5665	0	1.28875	1.28875	0.315196	0.820938	exon	ENSOCUT00000012840	ENSOCUG00000012827	UBA6	ubiquitin like modifier activating enzyme 6	---	---	---	---	---	ENSOCUT00000012840	82024157	82036796	6	82024157,82026982,82033156,82034977,82035898,82036730	82024279,82027105,82033259,82035039,82035974,82036796	558	+	82010124-82024156	82036797-82042765
13:37364783|37366523	1.5665	1.5665	2.29975	0	1.5665	0	1.81092	0.522168	-1.28875	0.49058	0.820938	exon	ENSOCUT00000014991	ENSOCUG00000014986	ASH1L	ASH1 like histone lysine methyltransferase	---	---	---	---	---	ENSOCUT00000014991	37364783	37366523	3	37364783,37365044,37366357	37364921,37365216,37366523	479	+	37364010-37364782	37366524-37369243
8:74266438|74281634	1.5665	2.78358	0	0	0	0	1.45003	0	-1.45003	0.271531	0.820938	exon	ENSOCUT00000006671	ENSOCUG00000006671	PIBF1	progesterone immunomodulatory binding factor 1	---	---	---	---	---	ENSOCUT00000006671	74266438	74281634	4	74266438,74266853,74268113,74281536	74266546,74267034,74268238,74281634	516	+	74260471-74266437	74281635-74332048
2:48039417|48052784	0	1.5665	2.29975	0	0	0	1.28875	0	-1.28875	0.324028	0.820938	exon	ENSOCUT00000011510	ENSOCUG00000011514	MFAP3L	microfibril associated protein 3 like	---	---	---	---	---	ENSOCUT00000011510	48039417	48052784	3	48039417,48052354,48052752	48040458,48052588,48052784	1310	-	---	48052785-48053930
14:85644810|85649687	1.5665	1.5665	1.5665	0	0	0	1.5665	0	-1.5665	0.276971	0.820938	exon	ENSOCUT00000011016	ENSOCUG00000011014	P3H2	prolyl 3-hydroxylase 2	---	---	---	---	---	ENSOCUT00000011016	85644810	85649687	4	85644810,85647016,85648993,85649545	85644904,85647056,85649082,85649687	369	-	85637314-85644809	85649688-85658475
15:11519224|11552360	0	0	0	1.67902	0	2.29975	0	1.32626	1.32626	0.308178	0.820938	exon	ENSOCUT00000014134,ENSOCUT00000033787	ENSOCUG00000014132	ARFIP1	ADP ribosylation factor interacting protein 1	---	---	---	---	---	ENSOCUT00000014134	11519224	11552360	6	11519224,11525488,11538219,11545754,11547643,11552252	11519398,11525645,11538440,11545866,11547738,11552360	873	-	11502967-11519223	11552361-11573896
13:42892254|42892568	4.06133	3.4342	3.14526	1.67902	1.5665	2.78358	3.54693	2.0097	-1.53723	0.448005	0.820938	exon	ENSOCUT00000003050	ENSOCUG00000003050	POLR3C	RNA polymerase III subunit C	---	---	---	---	---	ENSOCUT00000003050	42892254	42892568	2	42892254,42892464	42892346,42892568	198	-	42889361-42892253	42892569-42896438
13:83290854|83363916	3.14526	0	2.78358	0	1.5665	0	1.97628	0.522168	-1.45411	0.377846	0.820938	exon	ENSOCUT00000013645	ENSOCUG00000013639	ADGRL2	adhesion G protein-coupled receptor L2	---	---	---	---	---	ENSOCUT00000013645	83290854	83363916	2	83290854,83363744	83291067,83363916	387	-	83258869-83290853	---
16:39313931|39346735	0	1.5665	1.5665	0	0	0	1.04434	0	-1.04434	0.415139	0.820938	exon	ENSOCUT00000030647	ENSOCUG00000022926	DNAJC1	DnaJ heat shock protein family (Hsp40) member C1	---	---	---	---	---	ENSOCUT00000030647	39313931	39346735	4	39313931,39314961,39315997,39346645	39314096,39315058,39316090,39346735	449	+	39306059-39313930	39346736-39360338
13:56410148|56429422	1.5665	2.29975	0	3.29403	3.14526	3.88098	1.28875	3.44009	2.15134	0.348504	0.820938	exon	ENSOCUT00000000172	ENSOCUG00000000172	VAV3	vav guanine nucleotide exchange factor 3	---	---	---	---	---	ENSOCUT00000000172	56410148	56429422	4	56410148,56410844,56424645,56429377	56410249,56410944,56424670,56429422	275	+	56375273-56410147	56429423-56480368
17:22037193|22040654	2.78358	1.5665	0	0	0	0	1.45003	0	-1.45003	0.271531	0.820938	exon	ENSOCUT00000003687	ENSOCUG00000003686	USP8	ubiquitin specific peptidase 8	---	---	---	---	---	ENSOCUT00000003687	22037193	22040654	2	22037193,22040510	22037278,22040654	231	-	22021507-22037192	22040655-22044529
7:143786603|143786906	0	1.5665	1.5665	0	0	0	1.04434	0	-1.04434	0.415139	0.820938	exon	ENSOCUT00000008715	ENSOCUG00000008716	---	---	---	---	---	---	---	ENSOCUT00000008715	143786603	143786906	1	143786603	143786906	304	+	143785401-143786602	143786907-143788639
16:39583045|39614758	0	0	0	1.67902	0	1.5665	0	1.08184	1.08184	0.392701	0.820938	exon	ENSOCUT00000027174	ENSOCUG00000006040	MLLT10	MLLT10, histone lysine methyltransferase DOT1L cofactor	---	---	---	---	---	ENSOCUT00000027174	39583045	39614758	5	39583045,39585695,39588673,39602432,39614704	39583140,39585788,39588776,39602541,39614758	459	-	39550950-39583044	39614759-39671315
X:49845821|49852118	0	1.5665	1.5665	0	0	0	1.04434	0	-1.04434	0.415139	0.820938	exon	ENSOCUT00000033382,ENSOCUT00000015682	ENSOCUG00000015656	---	---	---	---	---	---	---	ENSOCUT00000015682	49845821	49852118	9	49845821,49846464,49847024,49848993,49849857,49850075,49850307,49850942,49852014	49846039,49846682,49847231,49849169,49849984,49850182,49850480,49851115,49852118	1512	+	49845115-49845820	49852119-49855619
15:50827650|50843747	1.5665	0	1.5665	0	0	0	1.04434	0	-1.04434	0.415139	0.820938	exon	ENSOCUT00000004257	ENSOCUG00000004258	METAP1	methionyl aminopeptidase 1	---	---	---	---	---	ENSOCUT00000004257	50827650	50843747	5	50827650,50834275,50838368,50840987,50843664	50827715,50834418,50838499,50841125,50843747	565	-	50824636-50827649	50843748-50844888
11:57409843|57418007	0	0	0	0	1.5665	1.5665	0	1.04434	1.04434	0.404744	0.820938	exon	ENSOCUT00000009161	ENSOCUG00000009162	NADK2	NAD kinase 2, mitochondrial	---	---	---	---	---	ENSOCUT00000009161	57409843	57418007	4	57409843,57414624,57416989,57417919	57409926,57414705,57417077,57418007	344	-	57407895-57409842	57418008-57442083
20:9045517|9048979	3.14526	3.67482	1.5665	2.43409	0	1.5665	2.79553	1.33353	-1.462	0.492628	0.820938	exon	ENSOCUT00000015862	ENSOCUG00000015859	PRKCH	protein kinase C eta	---	---	---	---	---	ENSOCUT00000015862	9045517	9048979	3	9045517,9046701,9048852	9045605,9046830,9048979	347	+	9041042-9045516	9048980-9053986
4:28274386|28297094	1.5665	1.5665	0	0	0	0	1.04434	0	-1.04434	0.415139	0.820938	exon	ENSOCUT00000023272,ENSOCUT00000007336	ENSOCUG00000007336	TMX4	thioredoxin related transmembrane protein 4	---	---	---	---	---	ENSOCUT00000007336	28274386	28297094	5	28274386,28282264,28284412,28288016,28296993	28274501,28282309,28284540,28288061,28297094	439	+	28258063-28274385	28297095-28307803
1:4291211|4295262	0	0	0	2.43409	1.5665	0	0	1.33353	1.33353	0.301396	0.820938	exon	ENSOCUT00000001874	ENSOCUG00000001868	ELP1	elongator complex protein 1	---	---	---	---	---	ENSOCUT00000001874	4291211	4295262	3	4291211,4294561,4295151	4291271,4294674,4295262	287	+	4290494-4291210	4295263-4297483
10:40181301|40184645	0	0	0	0	1.5665	1.5665	0	1.04434	1.04434	0.404744	0.820938	exon	ENSOCUT00000002573	ENSOCUG00000002574	STEAP4	STEAP4 metalloreductase	---	---	---	---	---	ENSOCUT00000002573	40181301	40184645	3	40181301,40182742,40184481	40181758,40183269,40184645	1151	+	40165558-40181300	40184646-40186933
3:77207881|77221327	1.5665	0	1.5665	0	0	0	1.04434	0	-1.04434	0.415139	0.820938	exon	ENSOCUT00000033893	ENSOCUG00000029233	ASPH	aspartate beta-hydroxylase	---	---	---	---	---	ENSOCUT00000033893	77207881	77221327	4	77207881,77213700,77215888,77221191	77208018,77213789,77215986,77221327	464	-	77183691-77207880	77221328-77225312
2:92765134|92780415	0	0	0	1.67902	1.5665	0	0	1.08184	1.08184	0.392701	0.820938	exon	ENSOCUT00000014583	ENSOCUG00000014576	REV1	REV1, DNA directed polymerase	---	---	---	---	---	ENSOCUT00000014583	92765134	92780415	5	92765134,92770563,92773953,92775691,92780310	92765286,92771263,92774060,92775807,92780415	1185	+	92753382-92765133	92780416-92785108
15:66483975|66486101	1.5665	1.5665	0	0	0	0	1.04434	0	-1.04434	0.415139	0.820938	exon	ENSOCUT00000012439	ENSOCUG00000012421	PTPN13	protein tyrosine phosphatase, non-receptor type 13	---	---	---	---	---	ENSOCUT00000012439	66483975	66486101	2	66483975,66485949	66484113,66486101	292	+	66482694-66483974	66486102-66488050
1:192444754|192450386	2.29975	0	1.5665	0	0	0	1.28875	0	-1.28875	0.324028	0.820938	exon	ENSOCUT00000002157	ENSOCUG00000002156	PATL1	PAT1 homolog 1, processing body mRNA decay factor	---	---	---	---	---	ENSOCUT00000002157	192444754	192450386	5	192444754,192447133,192448115,192449736,192450263	192444913,192447281,192448174,192449833,192450386	591	-	192441215-192444753	192450387-192451505
5:1912273|1913903	0	1.5665	0	0	2.78358	3.14526	0.522168	1.97628	1.45411	0.374863	0.820938	exon_intron	ENSOCUT00000033998	ENSOCUG00000029451	---	---	---	---	---	---	---	ENSOCUT00000033998	1912273	1913903	2	1912273,1913777	1912365,1913903	220	-	1903317-1912272	---
17:38835800|38841160	2.78358	0	1.5665	0	0	0	1.45003	0	-1.45003	0.271531	0.820938	exon	ENSOCUT00000011492	ENSOCUG00000011459	RYR3	ryanodine receptor 3	---	---	---	---	---	ENSOCUT00000011492	38835800	38841160	4	38835800,38837270,38839490,38841042	38835968,38837405,38839585,38841160	520	+	38829027-38835799	38841161-38848265
13:101612852|101623418	1.5665	1.5665	2.78358	0	0	1.5665	1.9722	0.522168	-1.45003	0.423528	0.820938	exon	ENSOCUT00000029776	ENSOCUG00000006221	RAVER2	ribonucleoprotein, PTB binding 2	---	---	---	---	---	ENSOCUT00000029776	101612852	101623418	3	101612852,101613662,101623201	101612988,101613773,101623418	467	-	101596764-101612851	101623419-101624006
10:38363638|38373206	0	0	1.5665	2.43409	1.5665	1.5665	0.522168	1.8557	1.33353	0.469889	0.820938	exon	ENSOCUT00000031827	ENSOCUG00000014836	CFAP69	cilia and flagella associated protein 69	---	---	---	---	---	ENSOCUT00000031827	38363638	38373206	4	38363638,38367529,38371088,38373147	38363714,38367638,38371153,38373206	313	-	38359135-38363637	38373207-38374499
8:37341929|37344496	0	1.5665	1.5665	0	0	0	1.04434	0	-1.04434	0.415139	0.820938	exon	ENSOCUT00000012964	ENSOCUG00000012946	KDM5A	lysine demethylase 5A	---	---	---	---	---	ENSOCUT00000012964	37341929	37344496	3	37341929,37343346,37344338	37342034,37343437,37344496	357	+	37333231-37341928	37344497-37347027
13:125442641|125465866	1.5665	0	3.14526	0	1.5665	0	1.57059	0.522168	-1.04842	0.468757	0.820938	exon_intron	ENSOCUT00000004701	ENSOCUG00000004703	SCMH1	Scm polycomb group protein homolog 1	---	---	---	---	---	ENSOCUT00000004701	125442641	125465866	2	125442641,125465632	125443731,125465866	1326	+	125431205-125442640	125465867-125496159
9:19543511|19546510	0	0	0	0	2.29975	2.29975	0	1.53317	1.53317	0.259149	0.820938	exon	ENSOCUT00000007988	ENSOCUG00000007987	NISCH	nischarin	---	---	---	---	---	ENSOCUT00000007988	19543511	19546510	4	19543511,19544434,19544865,19546415	19543559,19544597,19544960,19546510	405	+	19531538-19543510	19546511-19547979
17:30016907|30017620	0	2.29975	1.5665	0	0	0	1.28875	0	-1.28875	0.324028	0.820938	exon	ENSOCUT00000026631,ENSOCUT00000011159	ENSOCUG00000011154	VPS39	VPS39, HOPS complex subunit	---	---	---	---	---	ENSOCUT00000011159	30016907	30017620	3	30016907,30017165,30017529	30017056,30017299,30017620	377	+	30015958-30016906	30017621-30019183
2:29133230|29161383	1.5665	0	0	1.67902	2.29975	2.78358	0.522168	2.25412	1.73195	0.361128	0.820938	exon	ENSOCUT00000005887	ENSOCUG00000005880	PDS5A	PDS5 cohesin associated factor A	---	---	---	---	---	ENSOCUT00000005887	29133230	29161383	11	29133230,29135026,29136323,29138682,29140833,29143441,29149392,29152233,29155595,29160726,29161297	29133311,29135139,29136474,29138827,29140927,29143556,29149532,29152313,29155721,29160823,29161383	1239	-	29131600-29133229	29161384-29164151
15:16702838|16730403	0	0	0	0	1.5665	1.5665	0	1.04434	1.04434	0.404744	0.820938	exon	ENSOCUT00000003127	ENSOCUG00000003124	ARHGAP10	Rho GTPase activating protein 10	---	---	---	---	---	ENSOCUT00000003127	16702838	16730403	6	16702838,16707196,16711651,16721106,16723362,16730302	16702932,16707302,16711780,16721210,16723472,16730403	650	-	16684554-16702837	16730404-16769520
9:103209568|103247160	0	0	0	0	2.29975	1.5665	0	1.28875	1.28875	0.315196	0.820938	exon	ENSOCUT00000015755	ENSOCUG00000015736	PHLPP1	PH domain and leucine rich repeat protein phosphatase 1	---	---	---	---	---	ENSOCUT00000015755	103209568	103247160	8	103209568,103210554,103216863,103219334,103223051,103227774,103243338,103246998	103209714,103210784,103217065,103219394,103223146,103227929,103243538,103247160	1258	+	103184396-103209567	103247161-103260725
11:30808576|30839011	0	0	0	2.9272	0	1.5665	0	1.4979	1.4979	0.258348	0.820938	exon	ENSOCUT00000003132	ENSOCUG00000003129	WDR36	WD repeat domain 36	---	---	---	---	---	ENSOCUT00000003132	30808576	30839011	17	30808576,30810532,30812331,30814343,30816263,30816651,30817162,30817707,30818983,30820195,30825854,30826749,30827124,30830244,30837155,30838078,30838866	30808676,30810649,30812463,30814397,30816395,30816826,30817282,30817772,30819069,30820340,30825968,30826914,30827232,30830323,30837262,30838175,30839011	1958	+	30807224-30808575	30839012-30841747
17:50514703|50544266	1.5665	1.5665	0	0	0	0	1.04434	0	-1.04434	0.415139	0.820938	exon	ENSOCUT00000007826	ENSOCUG00000007824	G2E3	G2/M-phase specific E3 ubiquitin protein ligase	---	---	---	---	---	ENSOCUT00000007826	50514703	50544266	9	50514703,50516195,50522204,50522981,50527770,50527998,50531161,50536063,50544094	50514827,50516360,50522310,50523097,50527894,50528127,50531468,50536244,50544266	1433	+	50513517-50514702	50544267-50546859
7:13614005|13622136	0	0	0	0	0	3.14526	0	1.04842	1.04842	0.327414	0.820938	exon	ENSOCUT00000014201	ENSOCUG00000014199	WDR91	WD repeat domain 91	---	---	---	---	---	ENSOCUT00000014201	13614005	13622136	5	13614005,13615863,13619733,13621233,13621957	13614170,13615993,13619815,13621440,13622136	768	-	13600207-13614004	13622137-13623780
16:3532787|3542622	0	1.5665	1.5665	0	0	0	1.04434	0	-1.04434	0.415139	0.820938	exon	ENSOCUT00000017498	ENSOCUG00000017493	KIF5B	kinesin family member 5B	---	---	---	---	---	ENSOCUT00000017498	3532787	3542622	7	3532787,3533181,3534283,3535829,3537259,3540449,3542479	3532891,3533326,3534431,3536022,3537327,3540655,3542622	1014	+	3531192-3532786	3542623-3545276
11:53838950|53850088	1.5665	1.5665	0	0	0	0	1.04434	0	-1.04434	0.415139	0.820938	exon	ENSOCUT00000011519	ENSOCUG00000011508	---	---	---	---	---	---	---	ENSOCUT00000011519	53838950	53850088	3	53838950,53841833,53849933	53839092,53841965,53850088	432	+	53829000-53838949	53850089-53876404
9:52656787|52662959	0	0	0	1.67902	0	1.5665	0	1.08184	1.08184	0.392701	0.820938	exon	ENSOCUT00000009899	ENSOCUG00000009899	NDUFV2	NADH:ubiquinone oxidoreductase core subunit V2	---	---	---	---	---	ENSOCUT00000009899	52656787	52662959	4	52656787,52658265,52662705,52662897	52656896,52658433,52662821,52662959	459	-	52653865-52656786	52662960-52664653
17:20497285|20508303	2.78358	2.29975	2.29975	2.9272	4.497	3.88098	2.46103	3.7684	1.30737	0.473282	0.820938	exon	ENSOCUT00000012188	ENSOCUG00000012189	MAPK6	mitogen-activated protein kinase 6	---	---	---	---	---	ENSOCUT00000012188	20497285	20508303	3	20497285,20505291,20507117	20497449,20505435,20508303	1497	-	20493419-20497284	---
3:24875987|24907353	0	2.78358	3.4342	0	1.5665	0	2.07259	0.522168	-1.55043	0.346614	0.820938	exon	ENSOCUT00000011670	ENSOCUG00000011665	ARHGAP26	Rho GTPase activating protein 26	---	---	---	---	---	ENSOCUT00000011670	24875987	24907353	5	24875987,24877462,24882937,24889003,24907275	24876091,24877591,24883037,24889097,24907353	510	+	24869081-24875986	24907354-24971407
8:35957714|35957966	2.29975	0	1.5665	0	0	0	1.28875	0	-1.28875	0.324028	0.820938	exon	ENSOCUT00000017117	ENSOCUG00000017118	ADIPOR2	adiponectin receptor 2	---	---	---	---	---	ENSOCUT00000017117	35957714	35957966	1	35957714	35957966	253	-	35932374-35957713	35957967-36012189
4:43653856|43660925	0	0	0	0	1.5665	1.5665	0	1.04434	1.04434	0.404744	0.820938	exon	ENSOCUT00000027656	ENSOCUG00000010319	TBC1D30	TBC1 domain family member 30	---	---	---	---	---	ENSOCUT00000027656	43653856	43660925	3	43653856,43656976,43660713	43653968,43657115,43660925	466	+	43641571-43653855	43660926-43673294
13:20178058|20190424	0	0	0	1.67902	0	1.5665	0	1.08184	1.08184	0.392701	0.820938	exon	ENSOCUT00000007593	ENSOCUG00000007590	SUCO	SUN domain containing ossification factor	---	---	---	---	---	ENSOCUT00000007593	20178058	20190424	9	20178058,20180272,20182773,20184185,20184561,20184888,20187384,20187863,20190310	20178208,20180409,20182830,20184194,20184609,20184900,20187411,20187973,20190424	673	-	20166980-20178057	20190425-20190437
12:1287220|1294379	0	0	0	1.67902	1.5665	0	0	1.08184	1.08184	0.392701	0.820938	exon	ENSOCUT00000013165	ENSOCUG00000013150	DSP	desmoplakin	---	---	---	---	---	ENSOCUT00000013165	1287220	1294379	8	1287220,1288377,1289426,1290174,1291322,1291784,1292739,1294225	1287348,1288427,1289587,1290278,1291417,1291909,1292891,1294379	977	+	1283655-1287219	1294380-1296548
15:93338131|93352469	0	0	0	0	1.5665	2.78358	0	1.45003	1.45003	0.261483	0.820938	exon	ENSOCUT00000021439	ENSOCUG00000022350	CLOCK	clock circadian regulator	---	---	---	---	---	ENSOCUT00000021439	93338131	93352469	5	93338131,93345928,93347641,93348870,93352378	93338222,93346017,93347700,93349018,93352469	483	+	---	93352470-93360696
8:49628222|49652078	0	0	0	0	2.29975	2.29975	0	1.53317	1.53317	0.259149	0.820938	exon	ENSOCUT00000002483	ENSOCUG00000002476	COG3	component of oligomeric golgi complex 3	---	---	---	---	---	ENSOCUT00000002483	49628222	49652078	12	49628222,49635962,49639531,49642335,49644106,49645024,49645605,49648013,49649245,49650018,49651176,49651944	49628346,49636067,49639691,49642474,49644197,49645150,49645648,49648093,49649370,49650110,49651250,49652078	1305	-	49622930-49628221	49652110-49653279
17:20651586|20677774	0	0	1.5665	3.29403	1.5665	2.29975	0.522168	2.38676	1.86459	0.312346	0.820938	exon	ENSOCUT00000012985	ENSOCUG00000012987	---	---	---	---	---	---	---	ENSOCUT00000012985	20651586	20677774	7	20651586,20652446,20657038,20658808,20661615,20662669,20677618	20651733,20652589,20657145,20658938,20661704,20662791,20677774	901	-	20642997-20651585	20677775-20685074
11:85482464|85503521	0	2.29975	1.5665	0	0	0	1.28875	0	-1.28875	0.324028	0.820938	exon	ENSOCUT00000007527	ENSOCUG00000007527	CCDC125	coiled-coil domain containing 125	---	---	---	---	---	ENSOCUT00000007527	85482464	85503521	8	85482464,85484939,85488389,85492439,85499648,85500398,85501018,85503463	85482638,85485046,85488504,85492521,85499733,85500475,85501104,85503521	792	-	85476515-85482463	85503522-85509727
16:68071729|68080045	0	1.5665	1.5665	0	0	0	1.04434	0	-1.04434	0.415139	0.820938	exon	ENSOCUT00000000252	ENSOCUG00000000251	---	---	---	---	---	---	---	ENSOCUT00000000252	68071729	68080045	7	68071729,68072518,68073811,68074138,68074368,68076799,68079926	68071791,68072628,68073891,68074254,68074571,68076922,68080045	820	-	68068925-68071728	68080046-68082322
14:20270467|20299409	0	0	0	1.67902	0	1.5665	0	1.08184	1.08184	0.392701	0.820938	exon	ENSOCUT00000011063	ENSOCUG00000011063	UBP1	upstream binding protein 1	---	---	---	---	---	ENSOCUT00000011063	20270467	20299409	11	20270467,20271282,20274100,20274415,20276434,20282158,20282361,20284096,20284609,20291179,20299258	20270585,20271372,20274193,20274469,20276537,20282268,20282513,20284202,20284714,20291255,20299409	1169	-	20268159-20270466	20299410-20314016
9:108913633|108988150	0	0	0	0	0	3.14526	0	1.04842	1.04842	0.327414	0.820938	exon	ENSOCUT00000033041	ENSOCUG00000029000	CCDC102B	coiled-coil domain containing 102B	---	---	---	---	---	ENSOCUT00000033041	108913633	108988150	3	108913633,108923711,108987941	108913850,108923819,108988150	537	+	108910884-108913632	108988151-109102092
18:13688664|13695204	0	0	0	2.43409	2.29975	1.5665	0	2.10011	2.10011	0.169627	0.820938	exon	ENSOCUT00000023813	ENSOCUG00000012578	CAMK2G	calcium/calmodulin-dependent protein kinase type II subunit gamma	---	---	---	---	---	ENSOCUT00000023813	13688664	13695204	4	13688664,13691472,13694688,13695110	13688708,13691520,13694763,13695204	265	+	13687528-13688663	13695205-13696736
18:50389924|50392049	0	1.5665	2.29975	0	0	0	1.28875	0	-1.28875	0.324028	0.820938	exon	ENSOCUT00000005726	ENSOCUG00000005714	GBF1	golgi brefeldin A resistant guanine nucleotide exchange factor 1	---	---	---	---	---	ENSOCUT00000005726	50389924	50392049	4	50389924,50391186,50391479,50391844	50390149,50391346,50391725,50392049	840	+	50387142-50389923	50392050-50393273
15:13603279|13625190	0	0	0	3.29403	0	0	0	1.09801	1.09801	0.307228	0.820938	exon_intron	ENSOCUT00000021781,ENSOCUT00000008474	ENSOCUG00000022271,ENSOCUG00000008453	---,---	---,---	---	---	---	---	---	ENSOCUT00000021781	13603279	13625190	2	13603279,13624740	13621356,13625190	18529	+	---	13625191-13636953
3:101933172|101950455	0	0	0	0	1.5665	1.5665	0	1.04434	1.04434	0.404744	0.820938	exon	ENSOCUT00000030075	ENSOCUG00000001086	RMDN1	regulator of microtubule dynamics 1	---	---	---	---	---	ENSOCUT00000030075	101933172	101950455	7	101933172,101936457,101938900,101940899,101944906,101947994,101950368	101933305,101936487,101938987,101940954,101944995,101948153,101950455	647	-	101932725-101933171	101950456-101958036
19:26510550|26512191	0	2.29975	1.5665	0	0	0	1.28875	0	-1.28875	0.324028	0.820938	exon	ENSOCUT00000009408	ENSOCUG00000009402	USP32	ubiquitin specific peptidase 32	---	---	---	---	---	ENSOCUT00000009408	26510550	26512191	2	26510550,26511903	26510974,26512191	714	-	26509363-26510549	26512192-26513622
13:13441250|13464725	0	3.14526	2.29975	0	0	0	1.815	0	-1.815	0.211092	0.820938	exon	ENSOCUT00000011319	ENSOCUG00000011317	GALNT11	polypeptide N-acetylgalactosaminyltransferase 11	---	---	---	---	---	ENSOCUT00000011319	13441250	13464725	7	13441250,13445066,13449503,13453710,13456565,13463378,13464573	13441582,13445189,13449669,13453835,13456814,13463495,13464725	1271	+	---	13464726-13467674
11:58314574|58344261	3.14526	0	0	0	0	0	1.04842	0	-1.04842	0.334534	0.820938	exon	ENSOCUT00000025391	ENSOCUG00000025870	C5orf42	chromosome 5 open reading frame 42	---	---	---	---	---	ENSOCUT00000025391	58314574	58344261	14	58314574,58317238,58320032,58322134,58322446,58327121,58330134,58331713,58337652,58339530,58340407,58341955,58343071,58344053	58315513,58317538,58320140,58322292,58322555,58327259,58330298,58331930,58337791,58339758,58340580,58342119,58343151,58344261	3139	-	58313817-58314573	58344262-58347037
15:36032756|36033444	1.5665	0	1.5665	0	0	0	1.04434	0	-1.04434	0.415139	0.820938	exon	ENSOCUT00000010629	ENSOCUG00000010618	ANK2	ankyrin 2	---	---	---	---	---	ENSOCUT00000010629	36032756	36033444	2	36032756,36033361	36032920,36033444	249	-	36032568-36032755	36033445-36035890
21:14325735|14326016	0	0	0	0	3.14526	1.5665	0	1.57059	1.57059	0.241442	0.820938	exon	ENSOCUT00000008387	ENSOCUG00000008387	VSIG10	V-set and immunoglobulin domain containing 10	---	---	---	---	---	ENSOCUT00000008387	14325735	14326016	1	14325735	14326016	282	+	---	14326017-14339666
3:117812861|117813376	0	0	0	1.67902	1.5665	0	0	1.08184	1.08184	0.392701	0.820938	exon	ENSOCUT00000008570	ENSOCUG00000008549	UBR5	ubiquitin protein ligase E3 component n-recognin 5	---	---	---	---	---	ENSOCUT00000008570	117812861	117813376	2	117812861,117813216	117813100,117813376	401	-	117810325-117812860	117813377-117815040
9:102458300|102476176	1.5665	1.5665	0	0	0	0	1.04434	0	-1.04434	0.415139	0.820938	exon	ENSOCUT00000005279	ENSOCUG00000005271	PIGN	phosphatidylinositol glycan anchor biosynthesis class N	---	---	---	---	---	ENSOCUT00000005279	102458300	102476176	7	102458300,102461742,102463773,102466158,102468382,102468934,102475936	102458416,102461872,102463897,102466264,102468480,102469055,102476176	942	-	102451261-102458299	---
17:21723125|21737948	0	0	0	2.9272	2.29975	1.5665	0	2.26448	2.26448	0.143479	0.820938	exon	ENSOCUT00000003713	ENSOCUG00000003710	SPPL2A	signal peptide peptidase like 2A	---	---	---	---	---	ENSOCUT00000003713	21723125	21737948	9	21723125,21723564,21724227,21725145,21730057,21733833,21734539,21736266,21737874	21723244,21723746,21724316,21725278,21730208,21733929,21734640,21736347,21737948	1035	+	---	21737949-21743262
10:5577979|5617545	0	0	0	1.67902	1.5665	1.5665	0	1.60401	1.60401	0.261302	0.820938	exon	ENSOCUT00000002200	ENSOCUG00000002197	ITGB8	Integrin beta-8	---	---	---	---	---	ENSOCUT00000002200	5577979	5617545	9	5577979,5584396,5595446,5598136,5598885,5609669,5612797,5614297,5617140	5578064,5584570,5595692,5598301,5599043,5609764,5612886,5614431,5617545	1560	+	5540703-5577978	5617546-5620900
19:3151097|3164998	0	0	0	0	1.5665	2.29975	0	1.28875	1.28875	0.315196	0.820938	exon	ENSOCUT00000013393	ENSOCUG00000013388	ULK2	unc-51 like autophagy activating kinase 2	---	---	---	---	---	ENSOCUT00000013393	3151097	3164998	4	3151097,3158298,3164536,3164951	3151157,3158469,3164624,3164998	370	-	3144669-3151096	3164999-3174832
14:97411518|97414192	0	0	0	1.67902	1.5665	0	0	1.08184	1.08184	0.392701	0.820938	exon	ENSOCUT00000008087	ENSOCUG00000008077	POLQ	DNA polymerase theta	---	---	---	---	---	ENSOCUT00000008087	97411518	97414192	2	97411518,97414062	97411697,97414192	311	+	97410475-97411517	97414193-97416418
15:39949768|39950982	0	1.5665	1.5665	0	0	0	1.04434	0	-1.04434	0.415139	0.820938	exon	ENSOCUT00000001287	ENSOCUG00000001284	SEC24B	SEC24 homolog B, COPII coat complex component	---	---	---	---	---	ENSOCUT00000001287	39949768	39950982	2	39949768,39950845	39949943,39950982	314	+	39946457-39949767	39950983-39952154
9:59279986|59296999	3.14526	0	0	0	0	0	1.04842	0	-1.04842	0.334534	0.820938	exon	ENSOCUT00000016079	ENSOCUG00000000020	SMCHD1	structural maintenance of chromosomes flexible hinge domain containing 1	---	---	---	---	---	ENSOCUT00000016079	59279986	59296999	12	59279986,59281132,59283191,59283561,59284477,59286505,59290502,59291534,59293355,59294363,59295500,59296860	59280050,59281247,59283348,59283640,59284602,59286672,59290620,59291622,59293503,59294590,59295634,59296999	1573	-	59272885-59279985	59297000-59300198
12:145053079|145065992	2.29975	2.78358	0	0	0	0	1.69444	0	-1.69444	0.229082	0.820938	exon	ENSOCUT00000023944	ENSOCUG00000026063	SCAF8	SR-related CTD associated factor 8	---	---	---	---	---	ENSOCUT00000023944	145053079	145065992	7	145053079,145053445,145056100,145059179,145061563,145063892,145065859	145053210,145053557,145056293,145059279,145061676,145064048,145065992	945	+	145047844-145053078	145065993-145068315
8:84346|85814	0	0	0	0	1.5665	1.5665	0	1.04434	1.04434	0.404744	0.820938	exon	ENSOCUT00000002317	ENSOCUG00000002316	RPAP3	RNA polymerase II associated protein 3	---	---	---	---	---	ENSOCUT00000002317	84346	85814	2	84346,85628	84584,85814	426	+	78781-84345	85815-87141
2:63121022|63137097	1.5665	2.29975	0	0	0	0	1.28875	0	-1.28875	0.324028	0.820938	exon	ENSOCUT00000016252,ENSOCUT00000005820	ENSOCUG00000005816	SORBS2	sorbin and SH3 domain containing 2	---	---	---	---	---	ENSOCUT00000005820	63121022	63137097	6	63121022,63123297,63126561,63127395,63132306,63136959	63121136,63123477,63126605,63127461,63132478,63137097	720	-	63105353-63121021	63137098-63154009
11:82248503|82284174	0	0	0	2.9272	1.5665	0	0	1.4979	1.4979	0.258348	0.820938	exon	ENSOCUT00000001319	ENSOCUG00000001319	SREK1	splicing regulatory glutamic acid and lysine rich protein 1	---	---	---	---	---	ENSOCUT00000001319	82248503	82284174	10	82248503,82254365,82257508,82257783,82259113,82260099,82268080,82268592,82276139,82284021	82248636,82254480,82257672,82257961,82259243,82260213,82268199,82268936,82276234,82284174	1555	+	82240049-82248502	82284175-82287124
7:109293056|109302110	0	0	0	0	1.5665	2.78358	0	1.45003	1.45003	0.261483	0.820938	exon	ENSOCUT00000002202	ENSOCUG00000002198	FASTKD1	FAST kinase domains 1	---	---	---	---	---	ENSOCUT00000002202	109293056	109302110	5	109293056,109293505,109294419,109300130,109301624	109293169,109293636,109294547,109300244,109302110	977	-	109284930-109293055	109302111-109304062
9:10553061|10559607	1.5665	0	0	0	1.5665	4.06133	0.522168	1.87595	1.35378	0.324298	0.820938	exon	ENSOCUT00000006977	ENSOCUG00000006975	NR2C2	nuclear receptor subfamily 2 group C member 2	---	---	---	---	---	ENSOCUT00000006977	10553061	10559607	4	10553061,10553949,10557984,10559430	10553208,10554042,10558117,10559607	554	+	10550646-10553060	10559608-10561039
X:42312001|42362585	0	0	0	1.67902	0	1.5665	0	1.08184	1.08184	0.392701	0.820938	exon	ENSOCUT00000011266	ENSOCUG00000011267	---	---	---	---	---	---	---	ENSOCUT00000011266	42312001	42362585	4	42312001,42317948,42352207,42362394	42312130,42318180,42352386,42362585	735	-	42304801-42312000	42362586-42389972
13:13182247|13187936	2.78358	2.29975	0	0	0	0	1.69444	0	-1.69444	0.229082	0.820938	exon	ENSOCUT00000006462	ENSOCUG00000006463	PRKAG2	protein kinase AMP-activated non-catalytic subunit gamma 2	---	---	---	---	---	ENSOCUT00000006462	13182247	13187936	2	13182247,13187868	13182526,13187936	349	-	13078732-13182246	13187937-13274770
7:39655558|39660648	0	0	0	1.67902	1.5665	2.29975	0	1.84843	1.84843	0.208882	0.820938	exon	ENSOCUT00000010215	ENSOCUG00000010217	PSMC2	proteasome 26S subunit, ATPase 2	---	---	---	---	---	ENSOCUT00000010215	39655558	39660648	5	39655558,39656064,39657188,39659901,39660576	39655595,39656145,39657287,39660032,39660648	425	+	39653199-39655557	39660649-39661064
3:86014763|86024637	0	0	0	1.67902	1.5665	0	0	1.08184	1.08184	0.392701	0.820938	exon	ENSOCUT00000005974	ENSOCUG00000005967	NCOA2	nuclear receptor coactivator 2	---	---	---	---	---	ENSOCUT00000005974	86014763	86024637	3	86014763,86021954,86024422	86014928,86022083,86024637	512	-	86012081-86014762	86024638-86027350
X:98161389|98178139	1.5665	1.5665	0	0	0	0	1.04434	0	-1.04434	0.415139	0.820938	exon	ENSOCUT00000006005	ENSOCUG00000005996	THOC2	THO complex 2	---	---	---	---	---	ENSOCUT00000006005	98161389	98178139	10	98161389,98164001,98165592,98167109,98169129,98169966,98170995,98177354,98177555,98178098	98161553,98164180,98165709,98167205,98169209,98170059,98171079,98177455,98177685,98178139	1095	-	98155840-98161388	98178140-98195756
11:85443257|85447808	1.5665	1.5665	0	0	0	0	1.04434	0	-1.04434	0.415139	0.820938	exon	ENSOCUT00000007520	ENSOCUG00000007519	CDK7	cyclin dependent kinase 7	---	---	---	---	---	ENSOCUT00000007520	85443257	85447808	4	85443257,85444083,85446247,85447690	85443324,85444151,85446357,85447808	367	+	85441520-85443256	85447809-85450359
19:48610479|48612410	0	2.29975	1.5665	0	0	0	1.28875	0	-1.28875	0.324028	0.820938	exon	ENSOCUT00000004300	ENSOCUG00000004301	CCDC47	coiled-coil domain containing 47	---	---	---	---	---	ENSOCUT00000004300	48610479	48612410	3	48610479,48610772,48612236	48610544,48610893,48612410	363	-	48609362-48610478	48612411-48612887
X:51364333|51388874	0	0	3.14526	0	0	0	1.04842	0	-1.04842	0.334534	0.820938	exon	ENSOCUT00000021035	ENSOCUG00000024271	PHKA1	phosphorylase b kinase regulatory subunit alpha, skeletal muscle isoform	---	---	---	---	---	ENSOCUT00000021035	51364333	51388874	5	51364333,51374500,51375599,51382370,51388796	51364411,51374644,51375708,51382504,51388874	548	-	51360800-51364332	51388875-51390611
2:142563751|142573056	0	1.5665	1.5665	0	0	0	1.04434	0	-1.04434	0.415139	0.820938	exon	ENSOCUT00000027657	ENSOCUG00000024266	PLEKHH2	pleckstrin homology, MyTH4 and FERM domain containing H2	---	---	---	---	---	ENSOCUT00000027657	142563751	142573056	5	142563751,142564452,142566223,142569022,142572871	142563895,142564546,142566298,142569983,142573056	1464	-	142559556-142563750	142573057-142574145
20:7719509|7731981	1.5665	0	1.5665	0	0	0	1.04434	0	-1.04434	0.415139	0.820938	exon	ENSOCUT00000002244	ENSOCUG00000029440	PCNX4	pecanex homolog 4	---	---	---	---	---	ENSOCUT00000002244	7719509	7731981	8	7719509,7719796,7720558,7720786,7725563,7727236,7730401,7731795	7719688,7720310,7720658,7720908,7725926,7727339,7731431,7731981	2605	+	7711166-7719508	7731982-7737182
16:52402897|52406162	1.5665	0	1.5665	0	0	0	1.04434	0	-1.04434	0.415139	0.820938	exon	ENSOCUT00000013148	ENSOCUG00000013143	MARK1	microtubule affinity regulating kinase 1	---	---	---	---	---	ENSOCUT00000013148	52402897	52406162	3	52402897,52404060,52406062	52403148,52404224,52406162	518	-	52397739-52402896	52406163-52407278
14:119790217|119830542	0	3.14526	0	0	0	0	1.04842	0	-1.04842	0.334534	0.820938	exon	ENSOCUT00000005340	ENSOCUG00000005336	ABI3BP	ABI family member 3 binding protein	---	---	---	---	---	ENSOCUT00000005340	119790217	119830542	15	119790217,119790733,119791748,119793948,119794842,119800985,119802301,119803470,119806314,119810297,119815500,119823875,119826405,119829832,119830474	119790288,119790780,119791813,119794022,119794916,119801044,119802348,119803550,119806391,119810362,119815568,119823952,119826509,119829960,119830542	1119	+	119789560-119790216	119830543-119838200
17:14389317|14391773	0	0	0	0	0	3.4342	0	1.14473	1.14473	0.287889	0.820938	exon	ENSOCUT00000016946	ENSOCUG00000016942	ALDH1A2	aldehyde dehydrogenase 1 family member A2	---	---	---	---	---	ENSOCUT00000016946	14389317	14391773	3	14389317,14391405,14391660	14389378,14391533,14391773	305	+	14372007-14389316	14391774-14418808
1:108514097|108516928	1.5665	1.5665	0	0	0	0	1.04434	0	-1.04434	0.415139	0.820938	exon	ENSOCUT00000010913	ENSOCUG00000010907	CUL5	cullin-5	---	---	---	---	---	ENSOCUT00000010913	108514097	108516928	3	108514097,108514436,108516835	108514204,108514566,108516928	333	-	108509401-108514096	108516929-108541197
7:41426758|41432026	0	1.5665	1.5665	0	0	0	1.04434	0	-1.04434	0.415139	0.820938	exon	ENSOCUT00000006747	ENSOCUG00000006746	SRPK2	SRSF protein kinase 2	---	---	---	---	---	ENSOCUT00000006747	41426758	41432026	4	41426758,41430137,41430438,41431918	41426864,41430224,41430525,41432026	392	-	41410996-41426757	41432027-41465294
16:66542953|66549327	0	2.29975	0	1.67902	3.14526	2.78358	0.766583	2.53595	1.76937	0.475124	0.820938	exon	ENSOCUT00000014474	ENSOCUG00000014477	ELK4	ELK4, ETS transcription factor	---	---	---	---	---	ENSOCUT00000014474	66542953	66549327	3	66542953,66547579,66549211	66543168,66548457,66549327	1212	+	---	66549328-66551974
7:164283855|164308524	0	0	0	0	3.14526	0	0	1.04842	1.04842	0.327414	0.820938	exon_intron	ENSOCUT00000014975	ENSOCUG00000014970	ACSL3	acyl-CoA synthetase long chain family member 3	---	---	---	---	---	ENSOCUT00000014975	164283855	164308524	1	164283855	164308524	24670	+	164260253-164283854	164308525-164316132
15:39938910|39939827	1.5665	0	0	1.67902	2.78358	2.29975	0.522168	2.25412	1.73195	0.361128	0.820938	exon	ENSOCUT00000001287	ENSOCUG00000001284	SEC24B	SEC24 homolog B, COPII coat complex component	---	---	---	---	---	ENSOCUT00000001287	39938910	39939827	3	39938910,39939318,39939621	39939028,39939373,39939827	382	+	39934431-39938909	39939828-39941798
2:172935079|172947738	0	0	0	3.29403	1.5665	0	0	1.62018	1.62018	0.241167	0.820938	exon	ENSOCUT00000005722	ENSOCUG00000005723	ATAD2B	ATPase family, AAA domain containing 2B	---	---	---	---	---	ENSOCUT00000005722	172935079	172947738	2	172935079,172947552	172935264,172947738	373	-	172914531-172935078	172947739-172964130
9:19693322|19695254	0	1.5665	0	2.43409	2.29975	2.29975	0.522168	2.34453	1.82236	0.353577	0.820938	exon	ENSOCUT00000009832	ENSOCUG00000009829	PBRM1	polybromo 1	---	---	---	---	---	ENSOCUT00000009832	19693322	19695254	3	19693322,19694411,19695169	19693413,19694506,19695254	274	-	19691076-19693321	19695255-19698277
11:64374687|64390299	0	0	0	0	3.4342	0	0	1.14473	1.14473	0.287889	0.820938	exon	ENSOCUT00000001270	ENSOCUG00000001269	NNT	nicotinamide nucleotide transhydrogenase	---	---	---	---	---	ENSOCUT00000001270	64374687	64390299	5	64374687,64378022,64381314,64384812,64390112	64374916,64378239,64381401,64384900,64390299	813	+	64371334-64374686	64390300-64408722
18:52060849|52077371	0	0	0	0	1.5665	1.5665	0	1.04434	1.04434	0.404744	0.820938	exon	ENSOCUT00000008692	ENSOCUG00000008688	CFAP43	cilia and flagella associated protein 43	---	---	---	---	---	ENSOCUT00000008692	52060849	52077371	9	52060849,52061243,52062012,52064517,52071834,52072953,52074104,52076583,52077285	52061072,52061396,52062092,52064681,52071993,52073065,52074317,52076671,52077371	1287	-	---	52077372-52080350
1:97496794|97504201	0	2.29975	1.5665	0	0	0	1.28875	0	-1.28875	0.324028	0.820938	exon	ENSOCUT00000025315	ENSOCUG00000005196	ARHGEF12	Rho guanine nucleotide exchange factor 12	---	---	---	---	---	ENSOCUT00000025315	97496794	97504201	8	97496794,97497916,97500578,97501072,97501287,97501896,97503487,97504126	97497110,97498386,97500811,97501151,97501373,97501983,97503654,97504201	1521	-	97495422-97496793	97504202-97505592
16:23800036|23875939	1.5665	1.5665	0	2.43409	3.67482	1.5665	1.04434	2.55847	1.51413	0.394291	0.820938	exon	ENSOCUT00000015911	ENSOCUG00000015901	AKT3	AKT serine/threonine kinase 3	---	---	---	---	---	ENSOCUT00000015911	23800036	23875939	6	23800036,23835700,23844920,23854341,23874353,23875871	23800161,23835811,23845064,23854472,23874418,23875939	650	+	23664851-23800035	23875940-23897337
15:103637421|103653951	0	0	0	1.67902	1.5665	0	0	1.08184	1.08184	0.392701	0.820938	exon	ENSOCUT00000021311	ENSOCUG00000027940	HSPA4L	heat shock protein family A (Hsp70) member 4 like	---	---	---	---	---	ENSOCUT00000021311	103637421	103653951	5	103637421,103640138,103646990,103653421,103653844	103637554,103640337,103647088,103653546,103653951	667	+	103636040-103637420	103653952-103659027
2:132340533|132343422	1.5665	2.78358	0	0	0	0	1.45003	0	-1.45003	0.271531	0.820938	exon	ENSOCUT00000004707,ENSOCUT00000033961	ENSOCUG00000004696	---	---	---	---	---	---	---	ENSOCUT00000004707	132340533	132343422	3	132340533,132342694,132343331	132340685,132342798,132343422	350	+	132338999-132340532	132343423-132344620
13:38046065|38047126	1.5665	0	0	1.67902	2.29975	3.4342	0.522168	2.47099	1.94882	0.292581	0.820938	exon	ENSOCUT00000008548	ENSOCUG00000008544	ADAR	adenosine deaminase, RNA specific	---	---	---	---	---	ENSOCUT00000008548	38046065	38047126	3	38046065,38046694,38046936	38046213,38046838,38047126	485	+	38045214-38046064	38047127-38052466
7:90432626|90448569	0	3.14526	2.29975	0	0	0	1.815	0	-1.815	0.211092	0.820938	exon	ENSOCUT00000024240	ENSOCUG00000017435	RIF1	replication timing regulatory factor 1	---	---	---	---	---	ENSOCUT00000024240	90432626	90448569	12	90432626,90435359,90438995,90440013,90440410,90442388,90442667,90444157,90444835,90445109,90448058,90448420	90432764,90435510,90439097,90440186,90440520,90442450,90442767,90444243,90444905,90445289,90448165,90448569	1440	+	90419127-90432625	90448570-90456703
10:20665043|20709430	1.5665	1.5665	0	0	0	0	1.04434	0	-1.04434	0.415139	0.820938	exon	ENSOCUT00000003286	ENSOCUG00000003285	ELMO1	engulfment and cell motility 1	---	---	---	---	---	ENSOCUT00000003286	20665043	20709430	9	20665043,20667449,20671133,20672567,20679437,20682209,20688324,20697167,20709261	20665174,20667571,20671183,20672611,20679515,20682360,20688423,20697202,20709430	888	-	20613354-20665042	20709431-20724320
16:46820963|46830179	0	2.29975	1.5665	0	0	0	1.28875	0	-1.28875	0.324028	0.820938	intergenic region	n/a	n/a	---	---	---	---	---	---	---	16:46820963|46830179	46820963	46830179	1	46820963	46830179	9217	-	---	---
15:64295397|64316631	0	0	0	1.67902	1.5665	0	0	1.08184	1.08184	0.392701	0.820938	exon	ENSOCUT00000017147	ENSOCUG00000017147	CDS1	CDP-diacylglycerol synthase 1	---	---	---	---	---	ENSOCUT00000017147	64295397	64316631	3	64295397,64298092,64316573	64295494,64298231,64316631	297	+	64288246-64295396	64316632-64318985
8:43994874|44012380	0	0	1.5665	0	1.5665	3.14526	0.522168	1.57059	1.04842	0.465489	0.820938	exon	ENSOCUT00000003417	ENSOCUG00000003414	IFT88	intraflagellar transport 88	---	---	---	---	---	ENSOCUT00000003417	43994874	44012380	9	43994874,43998251,44000582,44002129,44003602,44004960,44010719,44011699,44012327	43994944,43998482,44000696,44002231,44003706,44005050,44010788,44011762,44012380	905	-	43985086-43994873	44012381-44013762
14:28820811|28821492	0	0	0	3.29403	0	0	0	1.09801	1.09801	0.307228	0.820938	exon	ENSOCUT00000003814	ENSOCUG00000003812	EPHB1	EPH receptor B1	---	---	---	---	---	ENSOCUT00000003814	28820811	28821492	1	28820811	28821492	682	+	28796922-28820810	28821493-28952353
13:120943176|120961322	0	0	0	0	2.29975	2.29975	0	1.53317	1.53317	0.259149	0.820938	exon_intron	ENSOCUT00000017939	ENSOCUG00000017939	GPBP1L1	GC-rich promoter binding protein 1 like 1	---	---	---	---	---	ENSOCUT00000017939	120943176	120961322	6	120943176,120944769,120948246,120948752,120959865,120961129	120944191,120944883,120948372,120949041,120959937,120961322	1815	+	---	120961323-120972461
10:8041028|8054769	0	0	0	1.67902	1.5665	0	0	1.08184	1.08184	0.392701	0.820938	exon	ENSOCUT00000006565	ENSOCUG00000006565	FAM126A	family with sequence similarity 126 member A	---	---	---	---	---	ENSOCUT00000006565	8041028	8054769	6	8041028,8041483,8042095,8043021,8047876,8054691	8041123,8041598,8042175,8043200,8047977,8054769	654	-	8029665-8041027	8054770-8092685
17:15851420|15915992	0	0	0	1.67902	1.5665	0	0	1.08184	1.08184	0.392701	0.820938	exon	ENSOCUT00000015100	ENSOCUG00000015094	---	---	---	---	---	---	---	ENSOCUT00000015100	15851420	15915992	17	15851420,15854020,15854185,15861376,15865012,15865313,15874697,15878190,15879328,15880652,15882612,15884585,15885038,15895271,15900394,15900661,15915947	15851566,15854085,15854324,15861493,15865182,15865422,15874920,15878347,15879428,15880798,15882746,15884892,15885178,15895330,15900512,15900697,15915992	2228	+	15845940-15851419	15915993-15927984
4:4707269|4708887	0	0	1.5665	0	2.78358	2.29975	0.522168	1.69444	1.17227	0.462339	0.820938	exon	ENSOCUT00000013125	ENSOCUG00000013126	TRPC4AP	transient receptor potential cation channel subfamily C member 4 associated protein	---	---	---	---	---	ENSOCUT00000013125	4707269	4708887	2	4707269,4708771	4707397,4708887	246	+	4691864-4707265	4708888-4720693
13:114510435|114516560	2.29975	0	2.78358	0	1.5665	0	1.69444	0.522168	-1.17227	0.465664	0.820938	exon	ENSOCUT00000000957	ENSOCUG00000000956	ZFYVE9	zinc finger FYVE-type containing 9	---	---	---	---	---	ENSOCUT00000000957	114510435	114516560	2	114510435,114516455	114512542,114516560	2214	-	114469930-114510434	114516561-114534972
13:143094321|143094650	3.14526	1.5665	0	0	0	0	1.57059	0	-1.57059	0.25414	0.820938	exon	ENSOCUT00000000696	ENSOCUG00000000695	NOL9	nucleolar protein 9	---	---	---	---	---	ENSOCUT00000000696	143094321	143094650	2	143094321,143094554	143094456,143094650	233	+	143091736-143094320	143094651-143096835
17:23288121|23298729	1.5665	0	1.5665	0	0	0	1.04434	0	-1.04434	0.415139	0.820938	exon	ENSOCUT00000006453,ENSOCUT00000033791	ENSOCUG00000006455	COPS2	COP9 signalosome subunit 2	---	---	---	---	---	ENSOCUT00000006453	23288121	23298729	8	23288121,23289531,23292099,23294060,23294299,23296490,23297065,23298677	23288234,23289608,23292224,23294170,23294376,23296664,23297243,23298729	914	+	23274653-23288120	23298730-23302095
16:68970123|68972617	0	2.29975	1.5665	0	0	0	1.28875	0	-1.28875	0.324028	0.820938	exon	ENSOCUT00000008011	ENSOCUG00000008003	KDM5B	lysine demethylase 5B	---	---	---	---	---	ENSOCUT00000008011	68970123	68972617	3	68970123,68971682,68972447	68970200,68971804,68972617	372	+	68937437-68970122	68972618-68977791
12:62804879|62828733	0	0	0	0	0	3.14526	0	1.04842	1.04842	0.327414	0.820938	exon	ENSOCUT00000031209,ENSOCUT00000023872	ENSOCUG00000024606	MYO6	myosin VI	---	---	---	---	---	ENSOCUT00000023872	62804879	62828733	10	62804879,62807757,62810648,62813221,62813601,62817293,62821090,62826473,62826696,62828604	62804970,62807829,62810775,62813316,62813774,62817331,62821183,62826603,62826773,62828733	1035	+	62802498-62804878	62828734-62838237
4:45400675|45458807	0	0	0	1.67902	0	1.5665	0	1.08184	1.08184	0.392701	0.820938	exon	ENSOCUT00000014022	ENSOCUG00000014011	GRIP1	glutamate receptor interacting protein 1	---	---	---	---	---	ENSOCUT00000014022	45400675	45458807	6	45400675,45403526,45407055,45417429,45420722,45458727	45400820,45403601,45407138,45417574,45420857,45458807	669	-	45364022-45400674	45458808-45510894
11:86662827|86697894	0	0	0	0	1.5665	2.29975	0	1.28875	1.28875	0.315196	0.820938	exon	ENSOCUT00000004276	ENSOCUG00000004275	---	---	---	---	---	---	---	ENSOCUT00000004276	86662827	86697894	12	86662827,86665084,86666285,86669952,86671136,86672971,86675371,86677524,86680527,86688341,86690746,86697690	86662925,86665297,86666294,86669977,86671188,86673024,86675382,86677538,86680632,86688347,86690881,86697894	937	+	86654068-86662826	86697895-86719493
7:127019194|127051110	3.88098	0	2.29975	0	0	2.29975	2.06024	0.766583	-1.29366	0.494392	0.820938	exon	ENSOCUT00000017629	ENSOCUG00000017626	ITGAV	integrin subunit alpha V	---	---	---	---	---	ENSOCUT00000017629	127019194	127051110	14	127019194,127024517,127024963,127026844,127027450,127035407,127037719,127039319,127042231,127045479,127046519,127047206,127050601,127051030	127019250,127024569,127025165,127027035,127027495,127035514,127037777,127039473,127042368,127045546,127046666,127047298,127050680,127051110	1481	+	127018731-127019193	127051111-127051876
12:50402511|50402779	0	0	1.5665	1.67902	2.29975	2.29975	0.522168	2.09284	1.57067	0.410451	0.820938	exon	ENSOCUT00000015526	ENSOCUG00000015520	PHF3	PHD finger protein 3	---	---	---	---	---	ENSOCUT00000015526	50402511	50402779	1	50402511	50402779	269	+	---	50402780-50433917
17:32110450|32116708	0	0	0	2.43409	1.5665	0	0	1.33353	1.33353	0.301396	0.820938	exon	ENSOCUT00000006516	ENSOCUG00000006506	EIF2AK4	eukaryotic translation initiation factor 2 alpha kinase 4	---	---	---	---	---	ENSOCUT00000006516	32110450	32116708	3	32110450,32112932,32116593	32110985,32113089,32116708	810	-	32104281-32110449	32116709-32130714
3:105364160|105365311	1.5665	1.5665	0	0	0	0	1.04434	0	-1.04434	0.415139	0.820938	exon	ENSOCUT00000009928	ENSOCUG00000009931	OSGIN2	oxidative stress induced growth inhibitor family member 2	---	---	---	---	---	ENSOCUT00000009928	105364160	105365311	2	105364160,105365120	105364296,105365311	329	+	105353546-105364159	105365312-105365330
14:76548501|76550332	0	0	1.5665	0	3.14526	2.29975	0.522168	1.815	1.29284	0.414194	0.820938	exon	ENSOCUT00000027297	ENSOCUG00000023518	FXR1	FMR1 autosomal homolog 1	---	---	---	---	---	ENSOCUT00000027297	76548501	76550332	2	76548501,76550239	76548553,76550332	147	+	76521167-76548500	76550333-76558515
18:35746554|35823595	0	0	0	1.67902	0	1.5665	0	1.08184	1.08184	0.392701	0.820938	exon	ENSOCUT00000008772	ENSOCUG00000008774	PTEN	phosphatase and tensin homolog	---	---	---	---	---	ENSOCUT00000008772	35746554	35823595	6	35746554,35771899,35797052,35802755,35804566,35823454	35746648,35771983,35797096,35802798,35804804,35823595	650	+	35744742-35746553	35823596-35830049
19:40908206|40909308	0	1.5665	2.29975	0	0	0	1.28875	0	-1.28875	0.324028	0.820938	exon	ENSOCUT00000013010	ENSOCUG00000013005	STARD3	StAR related lipid transfer domain containing 3	---	---	---	---	---	ENSOCUT00000013010	40908206	40909308	4	40908206,40908584,40908785,40909191	40908283,40908661,40908838,40909308	328	+	40903940-40908205	40909309-40909462
12:5325405|5325575	0	0	0	1.67902	1.5665	1.5665	0	1.60401	1.60401	0.261302	0.820938	exon	ENSOCUT00000028852	ENSOCUG00000022632	TMEM170B	transmembrane protein 170B	---	---	---	---	---	ENSOCUT00000028852	5325405	5325575	1	5325405	5325575	171	+	---	5325576-5339413
16:52867540|52868758	1.5665	0	2.29975	0	0	0	1.28875	0	-1.28875	0.324028	0.820938	exon	ENSOCUT00000010439	ENSOCUG00000010431	RAB3GAP2	RAB3 GTPase activating non-catalytic protein subunit 2	---	---	---	---	---	ENSOCUT00000010439	52867540	52868758	3	52867540,52868458,52868669	52867688,52868537,52868758	319	+	52861521-52867539	52868759-52870645
18:41108884|41120167	0	1.5665	0	1.67902	2.29975	1.5665	0.522168	1.84843	1.32626	0.477845	0.820938	exon	ENSOCUT00000008775	ENSOCUG00000008757	MYOF	myoferlin	---	---	---	---	---	ENSOCUT00000008775	41108884	41120167	9	41108884,41111943,41112083,41115503,41116824,41117582,41118136,41119974,41120105	41108966,41111986,41112151,41115606,41116950,41117697,41118166,41120024,41120167	688	-	41106751-41108883	41120168-41122801
12:136857216|136858985	0	1.5665	0	3.58623	2.29975	0	0.522168	1.96199	1.43983	0.35815	0.820938	exon	ENSOCUT00000010983	ENSOCUG00000010978	SHPRH	SNF2 histone linker PHD RING helicase	---	---	---	---	---	ENSOCUT00000010983	136857216	136858985	3	136857216,136858454,136858822	136857337,136858710,136858985	543	-	136845219-136857215	136858986-136865023
9:65084467|65086790	0	0	0	1.67902	2.29975	0	0	1.32626	1.32626	0.308178	0.820938	exon	ENSOCUT00000009886	ENSOCUG00000009869	LAMA3	laminin subunit alpha 3	---	---	---	---	---	ENSOCUT00000009886	65084467	65086790	4	65084467,65084669,65085377,65086620	65084583,65084848,65085519,65086790	611	+	65081917-65084466	65086791-65090581
1:37307099|37467561	1.5665	2.29975	1.5665	0	0	1.5665	1.81092	0.522168	-1.28875	0.49058	0.820938	exon	ENSOCUT00000022302	ENSOCUG00000004460	---	---	---	---	---	---	---	ENSOCUT00000022302	37307099	37467561	4	37307099,37316345,37360204,37467459	37307224,37316545,37360287,37467561	514	+	37243821-37307098	37467562-37496011
17:54574663|54601048	0	1.5665	2.29975	0	0	0	1.28875	0	-1.28875	0.324028	0.820938	exon	ENSOCUT00000012607	ENSOCUG00000012593	BAZ1A	bromodomain adjacent to zinc finger domain 1A	---	---	---	---	---	ENSOCUT00000012607	54574663	54601048	2	54574663,54600770	54574806,54601048	423	-	54565829-54574662	54601049-54612825
12:32453996|32454851	0	0	0	1.67902	0	2.78358	0	1.48753	1.48753	0.257503	0.820938	exon	ENSOCUT00000021716,ENSOCUT00000022890	ENSOCUG00000027862	CNPY3	canopy FGF signaling regulator 3	---	---	---	---	---	ENSOCUT00000021716	32453996	32454851	2	32453996,32454755	32454119,32454851	221	+	32445705-32453995	32454852-32456607
14:54943757|54957010	1.5665	1.5665	0	0	0	0	1.04434	0	-1.04434	0.415139	0.820938	exon	ENSOCUT00000001818	ENSOCUG00000001818	KPNA4	karyopherin subunit alpha 4	---	---	---	---	---	ENSOCUT00000001818	54943757	54957010	8	54943757,54945988,54949194,54949677,54955066,54955209,54955337,54956966	54943926,54946074,54949279,54949772,54955118,54955238,54955426,54957010	657	-	54943325-54943756	54957011-54984062
2:125028927|125041547	2.78358	1.5665	3.14526	0	1.5665	1.5665	2.49845	1.04434	-1.45411	0.439534	0.820938	exon	ENSOCUT00000027359	ENSOCUG00000017819	USP34	ubiquitin specific peptidase 34	---	---	---	---	---	ENSOCUT00000027359	125028927	125041547	6	125028927,125029147,125030279,125039283,125041180,125041404	125029031,125029271,125030402,125039362,125041320,125041547	719	+	125027489-125028926	125041548-125042595
15:21256114|21258554	0	0	0	1.67902	0	1.5665	0	1.08184	1.08184	0.392701	0.820938	exon	ENSOCUT00000011525	ENSOCUG00000011524	USP38	ubiquitin specific peptidase 38	---	---	---	---	---	ENSOCUT00000011525	21256114	21258554	2	21256114,21258396	21256307,21258554	353	-	21252782-21256113	21258555-21263434
7:86552731|86553205	0	0	1.5665	0	3.4342	2.78358	0.522168	2.07259	1.55043	0.343772	0.820938	exon	ENSOCUT00000016400	ENSOCUG00000016398	ACVR2A	activin A receptor type 2A	---	---	---	---	---	ENSOCUT00000016400	86552731	86553205	2	86552731,86553051	86552840,86553205	265	+	86549862-86552730	86553206-86568362
18:40027766|40076015	0	0	0	0	1.5665	1.5665	0	1.04434	1.04434	0.404744	0.820938	exon	ENSOCUT00000023257	ENSOCUG00000010454	CPEB3	cytoplasmic polyadenylation element binding protein 3	---	---	---	---	---	ENSOCUT00000023257	40027766	40076015	5	40027766,40030124,40042332,40062366,40075856	40027855,40030291,40042355,40062422,40076015	499	-	39999482-40027765	40076016-40117059
X:5946635|5961891	1.5665	0	2.29975	0	0	0	1.28875	0	-1.28875	0.324028	0.820938	exon	ENSOCUT00000024491	ENSOCUG00000025948	RPS6KA3	ribosomal protein S6 kinase A3	---	---	---	---	---	ENSOCUT00000024491	5946635	5961891	7	5946635,5947306,5947639,5950539,5951238,5952097,5961810	5946705,5947448,5947676,5950645,5951317,5952177,5961891	602	-	5940660-5946634	5961892-5970961
14:112332268|112400435	0	0	0	0	1.5665	1.5665	0	1.04434	1.04434	0.404744	0.820938	exon	ENSOCUT00000001687	ENSOCUG00000001686	BBX	BBX, HMG-box containing	---	---	---	---	---	ENSOCUT00000001687	112332268	112400435	3	112332268,112340226,112400362	112332510,112340396,112400435	488	-	112317466-112332267	112400436-112516078
16:18478339|18487012	0	0	0	1.67902	1.5665	0	0	1.08184	1.08184	0.392701	0.820938	exon	ENSOCUT00000031620,ENSOCUT00000027482	ENSOCUG00000027756	---	---	---	---	---	---	---	ENSOCUT00000027482	18478339	18487012	5	18478339,18480742,18482667,18482930,18486857	18478485,18480810,18482807,18483001,18487012	585	+	18468724-18478338	18487013-18505895
9:90285609|90287464	0	2.78358	2.29975	0	1.5665	0	1.69444	0.522168	-1.17227	0.465664	0.820938	exon	ENSOCUT00000033585,ENSOCUT00000015855	ENSOCUG00000015851	DYM	dymeclin	---	---	---	---	---	ENSOCUT00000015855	90285609	90287464	2	90285609,90287339	90285751,90287464	269	-	90245983-90285608	90287465-90311975
7:97949072|97982797	2.29975	0	2.29975	0	0	0	1.53317	0	-1.53317	0.266927	0.820938	exon	ENSOCUT00000015117	ENSOCUG00000015107	TANC1	tetratricopeptide repeat, ankyrin repeat and coiled-coil containing 1	---	---	---	---	---	ENSOCUT00000015117	97949072	97982797	2	97949072,97982693	97949260,97982797	294	+	97913004-97949071	97982798-97995840
18:66390252|66392582	0	1.5665	1.5665	0	0	0	1.04434	0	-1.04434	0.415139	0.820938	exon_intron	ENSOCUT00000005007	ENSOCUG00000005006	SFXN4	sideroflexin 4	---	---	---	---	---	ENSOCUT00000005007	66390252	66392582	3	66390252,66391161,66392379	66390367,66391239,66392582	399	-	66384654-66390251	66392583-66393554
3:80549756|80562490	0	0	0	0	1.5665	1.5665	0	1.04434	1.04434	0.404744	0.820938	exon	ENSOCUT00000000440	ENSOCUG00000000440	CYP7B1	cytochrome P450 family 7 subfamily B member 1	---	---	---	---	---	ENSOCUT00000000440	80549756	80562490	3	80549756,80561232,80561900	80549931,80561438,80562490	974	-	80539089-80549755	80562491-80575150
21:6275589|6277021	0	1.5665	0	0	2.78358	2.29975	0.522168	1.69444	1.17227	0.462339	0.820938	exon	ENSOCUT00000002721	ENSOCUG00000002722	ANAPC5	anaphase promoting complex subunit 5	---	---	---	---	---	ENSOCUT00000002721	6275589	6277021	4	6275589,6276215,6276691,6276874	6275663,6276336,6276798,6277021	453	+	6267058-6275588	6277022-6280603
5:2736756|2739105	1.5665	3.4342	2.78358	0	0	1.5665	2.59476	0.522168	-2.07259	0.27133	0.820938	exon	ENSOCUT00000031423	ENSOCUG00000016911	---	---	---	---	---	---	---	ENSOCUT00000031423	2736756	2739105	2	2736756,2738969	2736914,2739105	296	+	---	2739106-2743152
9:114759747|115044775	2.78358	1.5665	0	0	0	0	1.45003	0	-1.45003	0.271531	0.820938	exon	ENSOCUT00000004014	ENSOCUG00000004015	ZNF407	zinc finger protein 407	---	---	---	---	---	ENSOCUT00000004014	114759747	115044775	7	114759747,114770456,114908910,115001160,115005112,115014936,115044597	114764442,114770570,114908984,115001326,115005195,115015056,115044775	5437	+	114733749-114759746	115044776-115185240
19:52783769|52789563	3.4342	0	0	0	0	0	1.14473	0	-1.14473	0.294414	0.820938	exon	ENSOCUT00000008019	ENSOCUG00000008011	ABCA8	ATP binding cassette subfamily A member 8	---	---	---	---	---	ENSOCUT00000008019	52783769	52789563	4	52783769,52786411,52788521,52789430	52783942,52786518,52788658,52789563	554	-	52777430-52783768	52789564-52790897
15:66519293|66524492	0	1.5665	1.5665	0	0	0	1.04434	0	-1.04434	0.415139	0.820938	exon	ENSOCUT00000012439	ENSOCUG00000012421	PTPN13	protein tyrosine phosphatase, non-receptor type 13	---	---	---	---	---	ENSOCUT00000012439	66519293	66524492	5	66519293,66519619,66520834,66522814,66524334	66519507,66519717,66521198,66522997,66524492	1022	+	66517590-66519292	66524493-66525339
10:35541283|35544780	1.5665	0	1.5665	0	0	0	1.04434	0	-1.04434	0.415139	0.820938	exon	ENSOCUT00000000629	ENSOCUG00000000625	VPS50	VPS50, EARP/GARPII complex subunit	---	---	---	---	---	ENSOCUT00000000629	35541283	35544780	3	35541283,35544260,35544686	35541373,35544358,35544780	285	-	35538641-35541282	35544781-35546951
3:135659087|135688620	0	1.5665	1.5665	0	0	0	1.04434	0	-1.04434	0.415139	0.820938	exon	ENSOCUT00000017950	ENSOCUG00000017950	TAF2	TATA-box binding protein associated factor 2	---	---	---	---	---	ENSOCUT00000017950	135659087	135688620	7	135659087,135659932,135662711,135666791,135668559,135675687,135688460	135659186,135660045,135662895,135667022,135668700,135675805,135688620	1053	-	135642922-135659086	135688621-135693660
2:131207676|131212733	0	0	0	0	1.5665	3.4342	0	1.6669	1.6669	0.228953	0.820938	exon	ENSOCUT00000012042	ENSOCUG00000012044	EML6	echinoderm microtubule associated protein like 6	---	---	---	---	---	ENSOCUT00000012042	131207676	131212733	3	131207676,131212217,131212622	131207817,131212344,131212733	382	-	131203022-131207675	131212734-131215868
13:7050173|7054665	0	0	0	1.67902	1.5665	0	0	1.08184	1.08184	0.392701	0.820938	exon	ENSOCUT00000015559	ENSOCUG00000015531	CEP350	centrosomal protein 350	---	---	---	---	---	ENSOCUT00000015559	7050173	7054665	2	7050173,7054451	7050359,7054665	402	+	7048198-7050172	7054666-7055944
12:76545335|76572743	2.29975	1.5665	1.5665	0	0	1.5665	1.81092	0.522168	-1.28875	0.49058	0.820938	exon	ENSOCUT00000004573	ENSOCUG00000004534	MDN1	midasin AAA ATPase 1	---	---	---	---	---	ENSOCUT00000004573	76545335	76572743	16	76545335,76546097,76547158,76548462,76550531,76550910,76551275,76552645,76553764,76556231,76561664,76562509,76564121,76565038,76570422,76572599	76545483,76546302,76547274,76548621,76550792,76551173,76551364,76552833,76553871,76556428,76561786,76562717,76564318,76565256,76570551,76572743	2767	-	76544627-76545334	76572744-76575588
7:98278507|98310159	0	0	0	1.67902	1.5665	0	0	1.08184	1.08184	0.392701	0.820938	exon	ENSOCUT00000031329	ENSOCUG00000015150	BAZ2B	bromodomain adjacent to zinc finger domain 2B	---	---	---	---	---	ENSOCUT00000031329	98278507	98310159	4	98278507,98280404,98284845,98310013	98278700,98280562,98285033,98310159	689	-	98267451-98278506	98310160-98406603
X:36116673|36134495	0	0	0	0	1.5665	1.5665	0	1.04434	1.04434	0.404744	0.820938	exon	ENSOCUT00000002637	ENSOCUG00000002629	PHF8	PHD finger protein 8	---	---	---	---	---	ENSOCUT00000002637	36116673	36134495	5	36116673,36117161,36118459,36119178,36134400	36116851,36117246,36118592,36119491,36134495	809	+	36109471-36116672	36134496-36151742
2:118750377|118757932	0	1.5665	0	0	2.29975	3.14526	0.522168	1.815	1.29284	0.414194	0.820938	exon	ENSOCUT00000001809	ENSOCUG00000001812	ETAA1	ETAA1, ATR kinase activator	---	---	---	---	---	ENSOCUT00000001809	118750377	118757932	4	118750377,118752572,118757468,118757807	118752328,118752684,118757544,118757932	2268	-	118745538-118750376	118757933-118759343
13:125465632|125504715	0	0	0	0	1.5665	2.78358	0	1.45003	1.45003	0.261483	0.820938	exon	ENSOCUT00000004701	ENSOCUG00000004703	SCMH1	Scm polycomb group protein homolog 1	---	---	---	---	---	ENSOCUT00000004701	125465632	125504715	3	125465632,125496160,125504472	125465866,125496248,125504715	568	+	125443732-125465631	125504716-125550848
11:57305893|57324182	1.5665	1.5665	0	0	0	0	1.04434	0	-1.04434	0.415139	0.820938	exon	ENSOCUT00000011425	ENSOCUG00000011423	LMBRD2	LMBR1 domain containing 2	---	---	---	---	---	ENSOCUT00000011425	57305893	57324182	8	57305893,57306443,57309276,57315411,57316636,57320156,57322810,57323950	57306076,57306556,57309350,57315621,57316803,57320251,57322907,57324182	1179	-	57302255-57305892	---
14:12150317|12152892	0	0	0	0	2.29975	1.5665	0	1.28875	1.28875	0.315196	0.820938	exon	ENSOCUT00000000720	ENSOCUG00000000717	TOP2B	DNA topoisomerase II beta	---	---	---	---	---	ENSOCUT00000000720	12150317	12152892	3	12150317,12151833,12152747	12150529,12151930,12152892	457	-	12147892-12150316	12152893-12161412
3:150417926|150433142	0	0	0	1.67902	1.5665	0	0	1.08184	1.08184	0.392701	0.820938	exon_intron	ENSOCUT00000031000,ENSOCUT00000019238	ENSOCUG00000027454,ENSOCUG00000019238	---,---	---,---	---	---	---	---	---	ENSOCUT00000019238	150417926	150433142	1	150417926	150433142	15217	-	---	---
10:8041028|8047977	0	0	1.5665	3.29403	2.29975	2.29975	0.522168	2.63117	2.10901	0.279126	0.820938	exon	ENSOCUT00000006565	ENSOCUG00000006565	FAM126A	family with sequence similarity 126 member A	---	---	---	---	---	ENSOCUT00000006565	8041028	8047977	5	8041028,8041483,8042095,8043021,8047876	8041123,8041598,8042175,8043200,8047977	575	-	8029665-8041027	8047978-8054690
2:142799089|142801506	0	0	0	0	1.5665	2.29975	0	1.28875	1.28875	0.315196	0.820938	exon	ENSOCUT00000001049	ENSOCUG00000001048	THADA	THADA, armadillo repeat containing	---	---	---	---	---	ENSOCUT00000001049	142799089	142801506	2	142799089,142801375	142799178,142801506	222	+	142746795-142799088	142801507-142840085
14:96413056|96414054	0	1.5665	2.29975	0	0	0	1.28875	0	-1.28875	0.324028	0.820938	exon	ENSOCUT00000003423	ENSOCUG00000003418	PARP14	poly(ADP-ribose) polymerase family member 14	---	---	---	---	---	ENSOCUT00000003423	96413056	96414054	3	96413056,96413518,96413905	96413223,96413580,96414054	381	-	96408055-96413055	96414055-96416735
14:85448201|85448455	1.5665	0	1.5665	0	0	0	1.04434	0	-1.04434	0.415139	0.820938	exon	ENSOCUT00000016469	ENSOCUG00000016465	TP63	tumor protein p63	---	---	---	---	---	ENSOCUT00000016469	85448201	85448455	1	85448201	85448455	255	+	85429792-85448200	85448456-85502824
X:32722725|32723180	4.92732	1.5665	3.4342	2.9272	2.29975	1.5665	3.30934	2.26448	-1.04486	0.462661	0.820938	exon	ENSOCUT00000010520	ENSOCUG00000010521	ELK1	ELK1, ETS transcription factor	---	---	---	---	---	ENSOCUT00000010520	32722725	32723180	1	32722725	32723180	456	-	32721094-32722724	32723181-32725353
3:7026327|7038424	0	0	0	1.67902	0	2.78358	0	1.48753	1.48753	0.257503	0.820938	exon	ENSOCUT00000013440	ENSOCUG00000013435	SNX2	sorting nexin 2	---	---	---	---	---	ENSOCUT00000013440	7026327	7038424	6	7026327,7032166,7035014,7035215,7036547,7038346	7026444,7032329,7035080,7035258,7036688,7038424	614	+	6978496-7026326	7038425-7046632
19:29704588|29708653	2.29975	0	2.29975	0	0	0	1.53317	0	-1.53317	0.266927	0.820938	exon	ENSOCUT00000009780	ENSOCUG00000009775	TEX14	testis expressed 14, intercellular bridge forming factor	---	---	---	---	---	ENSOCUT00000009780	29704588	29708653	3	29704588,29705739,29708579	29704790,29705841,29708653	381	+	29703597-29704587	29708654-29713875
19:20945991|20952904	2.78358	2.29975	2.29975	1.67902	0	0	2.46103	0.559675	-1.90135	0.348647	0.820938	exon	ENSOCUT00000008588	ENSOCUG00000008567	NF1	neurofibromin 1	---	---	---	---	---	ENSOCUT00000008588	20945991	20952904	4	20945991,20948919,20949944,20952747	20946117,20949050,20950079,20952904	553	+	20943886-20945990	20952905-20956487
17:437366|472623	3.14526	0	1.5665	0	1.5665	0	1.57059	0.522168	-1.04842	0.468757	0.820938	intergenic region	n/a	n/a	---	---	---	---	---	---	---	17:437366|472623	437366	472623	1	437366	472623	35258	+	---	---
2:152796353|152802868	0	0	0	0	1.5665	2.29975	0	1.28875	1.28875	0.315196	0.820938	exon	ENSOCUT00000033379,ENSOCUT00000015440	ENSOCUG00000015439	RASGRP3	RAS guanyl releasing protein 3	---	---	---	---	---	ENSOCUT00000015440	152796353	152802868	6	152796353,152796822,152798436,152799843,152800508,152802769	152796469,152796995,152798583,152799974,152800579,152802868	743	-	152793365-152796352	152802872-152806137
1:48406310|48409863	0	0	0	2.9272	0	1.5665	0	1.4979	1.4979	0.258348	0.820938	exon	ENSOCUT00000023528	ENSOCUG00000010108	RIC1	RIC1 homolog, RAB6A GEF complex partner 1	---	---	---	---	---	ENSOCUT00000023528	48406310	48409863	4	48406310,48407281,48409480,48409705	48406501,48407567,48409616,48409863	775	-	48403347-48406309	48409864-48411684
3:140746338|140752658	1.5665	0	1.5665	0	0	0	1.04434	0	-1.04434	0.415139	0.820938	exon	ENSOCUT00000015792	ENSOCUG00000015785	WASHC5	WASH complex subunit 5	---	---	---	---	---	ENSOCUT00000015792	140746338	140752658	3	140746338,140751100,140752529	140746491,140751196,140752658	381	-	140743019-140746337	140752659-140753789
13:9938263|9959843	0	1.5665	1.5665	0	0	0	1.04434	0	-1.04434	0.415139	0.820938	exon	ENSOCUT00000000064	ENSOCUG00000000064	---	---	---	---	---	---	---	ENSOCUT00000000064	9938263	9959843	6	9938263,9940303,9952394,9953555,9957264,9959752	9938404,9940434,9952504,9953614,9957373,9959843	647	-	9937458-9938262	9959844-9961481
11:82137413|82139333	0	0	0	1.67902	2.29975	1.5665	0	1.84843	1.84843	0.208882	0.820938	exon	ENSOCUT00000003801	ENSOCUG00000003795	ERBIN	erbb2 interacting protein	---	---	---	---	---	ENSOCUT00000003801	82137413	82139333	3	82137413,82137892,82139264	82137542,82138007,82139333	316	+	82136906-82137412	82139334-82152281
8:43998251|44010788	0	0	3.14526	0	0	0	1.04842	0	-1.04842	0.334534	0.820938	exon	ENSOCUT00000003417	ENSOCUG00000003414	IFT88	intraflagellar transport 88	---	---	---	---	---	ENSOCUT00000003417	43998251	44010788	6	43998251,44000582,44002129,44003602,44004960,44010719	43998482,44000696,44002231,44003706,44005050,44010788	716	-	43994945-43998250	44010789-44011698
2:41866191|41872950	1.5665	2.78358	0	0	0	0	1.45003	0	-1.45003	0.271531	0.820938	exon	ENSOCUT00000009930	ENSOCUG00000009932	ESCO2	establishment of sister chromatid cohesion N-acetyltransferase 2	---	---	---	---	---	ENSOCUT00000009930	41866191	41872950	4	41866191,41867322,41870979,41872830	41866334,41867411,41871110,41872950	487	-	41856285-41866190	41872951-41876726
4:5141104|5145395	0	0	0	0	1.5665	2.29975	0	1.28875	1.28875	0.315196	0.820938	exon	ENSOCUT00000009627	ENSOCUG00000009627	PIGU	phosphatidylinositol glycan anchor biosynthesis class U	---	---	---	---	---	ENSOCUT00000009627	5141104	5145395	3	5141104,5143445,5145271	5141258,5143588,5145395	424	+	5114600-5141103	5145396-5150646
18:18087102|18089119	1.5665	0	2.29975	0	0	0	1.28875	0	-1.28875	0.324028	0.820938	exon_intron	ENSOCUT00000007207	ENSOCUG00000013277	---	---	---	---	---	---	---	ENSOCUT00000007207	18087102	18089119	1	18087102	18089119	2018	-	18053904-18087101	---
11:425066|470473	1.5665	0	1.5665	0	0	0	1.04434	0	-1.04434	0.415139	0.820938	exon	ENSOCUT00000009515	ENSOCUG00000009513	PAPD4	poly(A) RNA polymerase D4, non-canonical	---	---	---	---	---	ENSOCUT00000009515	425066	470473	11	425066,425271,428344,431111,436923,437354,446988,456894,457087,466339,470394	425180,425362,428410,431180,436999,437482,447031,456986,457130,466430,470473	903	+	409527-425065	470474-472809
3:17458767|17459295	3.67482	2.78358	3.4342	0	2.29975	2.29975	3.29753	1.53317	-1.76437	0.473125	0.820938	exon	ENSOCUT00000008262	ENSOCUG00000008254	SEC24A	SEC24 homolog A, COPII coat complex component	---	---	---	---	---	ENSOCUT00000008262	17458767	17459295	2	17458767,17459158	17458942,17459295	314	+	17453080-17458766	17459296-17461327
13:141118142|141118653	1.5665	0	1.5665	0	0	0	1.04434	0	-1.04434	0.415139	0.820938	exon	ENSOCUT00000033647,ENSOCUT00000010086	ENSOCUG00000010086	ENO1	enolase 1	---	---	---	---	---	ENSOCUT00000010086	141118142	141118653	2	141118142,141118452	141118339,141118653	400	+	141116572-141118141	141118654-141119521
12:136686110|136688165	0	0	0	2.43409	2.29975	0	0	1.57795	1.57795	0.250052	0.820938	exon	ENSOCUT00000010587	ENSOCUG00000010589	FBXO30	F-box protein 30	---	---	---	---	---	ENSOCUT00000010587	136686110	136688165	1	136686110	136688165	2056	-	136682052-136686109	136688166-136691853
5:22932238|22939404	0	0	3.14526	0	0	0	1.04842	0	-1.04842	0.334534	0.820938	exon	ENSOCUT00000010081	ENSOCUG00000010080	LRRC36	leucine rich repeat containing 36	---	---	---	---	---	ENSOCUT00000010081	22932238	22939404	4	22932238,22934060,22935016,22939316	22932365,22934252,22935112,22939404	507	+	22920498-22932237	22939405-22952235
3:72608281|72609875	0	1.5665	0	3.29403	1.5665	1.5665	0.522168	2.14234	1.62018	0.351774	0.820938	exon	ENSOCUT00000004426	ENSOCUG00000004428	IMPAD1	inositol monophosphatase domain containing 1	---	---	---	---	---	ENSOCUT00000004426	72608281	72609875	2	72608281,72609713	72608376,72609875	259	-	72596563-72608280	72609876-72624538
8:100560991|100574054	2.29975	1.5665	0	0	0	0	1.28875	0	-1.28875	0.324028	0.820938	exon	ENSOCUT00000022682,ENSOCUT00000002995	ENSOCUG00000002984	DOCK9	dedicator of cytokinesis 9	---	---	---	---	---	ENSOCUT00000002995	100560991	100574054	7	100560991,100563275,100566565,100566890,100568176,100568472,100573939	100561097,100563332,100566780,100567003,100568358,100568609,100574054	932	-	100546273-100560990	100574055-100582948
9:64742374|64747422	0	0	0	0	0	3.14526	0	1.04842	1.04842	0.327414	0.820938	exon	ENSOCUT00000009857,ENSOCUT00000033828	ENSOCUG00000009850	NPC1	Niemann-Pick C1 protein precursor	---	---	---	---	---	ENSOCUT00000009857	64742374	64747422	5	64742374,64743994,64744801,64746459,64747255	64742600,64744364,64744874,64746708,64747422	1090	-	64738703-64742373	64747423-64753308
14:163636672|163637739	0	0	0	1.67902	1.5665	2.29975	0	1.84843	1.84843	0.208882	0.820938	exon	ENSOCUT00000004817	ENSOCUG00000004806	PCNT	pericentrin	---	---	---	---	---	ENSOCUT00000004817	163636672	163637739	2	163636672,163637493	163636759,163637739	335	-	163630887-163636671	163637740-163639432
9:19680723|19695254	3.4342	0	1.5665	0	0	1.5665	1.6669	0.522168	-1.14473	0.420985	0.820938	exon	ENSOCUT00000009832	ENSOCUG00000009829	PBRM1	polybromo 1	---	---	---	---	---	ENSOCUT00000009832	19680723	19695254	5	19680723,19690862,19693322,19694411,19695169	19680864,19691075,19693413,19694506,19695254	630	-	19678662-19680722	19695255-19698277
13:5981402|5996438	0	1.5665	1.5665	0	0	0	1.04434	0	-1.04434	0.415139	0.820938	exon	ENSOCUT00000005161	ENSOCUG00000005161	RALGPS2	Ral GEF with PH domain and SH3 binding motif 2	---	---	---	---	---	ENSOCUT00000005161	5981402	5996438	6	5981402,5984172,5985022,5990352,5994419,5996333	5981469,5984307,5985173,5990406,5994496,5996438	595	+	5976581-5981401	5996439-5999666
3:7743428|7761345	1.5665	2.29975	2.29975	1.67902	0	0	2.05533	0.559675	-1.49566	0.44671	0.820938	exon	ENSOCUT00000014819	ENSOCUG00000014821	CSNK1G3	casein kinase 1 gamma 3	---	---	---	---	---	ENSOCUT00000014819	7743428	7761345	3	7743428,7753586,7761276	7743854,7753626,7761345	538	+	7712918-7743427	7761346-7776861
15:14336655|14336989	0	0	0	2.9272	0	1.5665	0	1.4979	1.4979	0.258348	0.820938	exon	ENSOCUT00000008445	ENSOCUG00000008443	DCLK2	doublecortin like kinase 2	---	---	---	---	---	ENSOCUT00000008445	14336655	14336989	1	14336655	14336989	335	-	14260105-14336654	14336990-14366249
1:14433843|14434660	0	0	0	0	2.29975	1.5665	0	1.28875	1.28875	0.315196	0.820938	exon	ENSOCUT00000016207	ENSOCUG00000016201	ANKS6	ankyrin repeat and sterile alpha motif domain containing 6	---	---	---	---	---	ENSOCUT00000016207	14433843	14434660	2	14433843,14434456	14433887,14434660	250	+	14428388-14433842	14434661-14437245
20:5154245|5314103	0	1.5665	1.5665	0	0	0	1.04434	0	-1.04434	0.415139	0.820938	exon	ENSOCUT00000000900	ENSOCUG00000000898	GPHN	gephyrin	---	---	---	---	---	ENSOCUT00000000900	5154245	5314103	9	5154245,5178057,5179940,5181470,5190580,5204482,5232812,5252793,5313969	5154366,5178210,5179998,5181589,5190635,5204574,5232949,5252835,5314103	920	-	5130316-5154244	5314104-5334242
3:83907962|83939090	0	0	0	2.43409	0	1.5665	0	1.33353	1.33353	0.301396	0.820938	exon	ENSOCUT00000001785	ENSOCUG00000001781	PREX2	phosphatidylinositol-3,4,5-trisphosphate dependent Rac exchange factor 2	---	---	---	---	---	ENSOCUT00000001785	83907962	83939090	6	83907962,83912666,83919671,83930277,83934645,83938990	83908123,83912799,83919774,83930426,83934789,83939090	796	+	83904180-83907961	83939091-83957776
18:9582450|9583378	0	0	0	0	1.5665	2.29975	0	1.28875	1.28875	0.315196	0.820938	exon	ENSOCUT00000012456,ENSOCUT00000033499	ENSOCUG00000012450	POLR3A	RNA polymerase III subunit A	---	---	---	---	---	ENSOCUT00000012456	9582450	9583378	3	9582450,9582785,9583242	9582689,9582947,9583378	540	+	9578862-9582449	9583379-9586129
1:108352597|108359827	0	0	0	1.67902	2.29975	0	0	1.32626	1.32626	0.308178	0.820938	exon	ENSOCUT00000014699	ENSOCUG00000014663	ATM	ATM serine/threonine kinase	---	---	---	---	---	ENSOCUT00000014699	108352597	108359827	4	108352597,108358151,108359515,108359726	108352761,108358296,108359627,108359827	526	-	108340381-108352596	108359828-108365270
16:34988932|34994028	0	0	0	2.43409	2.29975	0	0	1.57795	1.57795	0.250052	0.820938	exon	ENSOCUT00000024999	ENSOCUG00000014363	PCNX2	pecanex homolog 2	---	---	---	---	---	ENSOCUT00000024999	34988932	34994028	2	34988932,34993813	34988990,34994028	275	+	34968568-34988931	34994029-35028493
2:12971878|12993640	1.5665	1.5665	0	0	0	0	1.04434	0	-1.04434	0.415139	0.820938	exon	ENSOCUT00000000920	ENSOCUG00000000919	ADGRA3	adhesion G protein-coupled receptor A3	---	---	---	---	---	ENSOCUT00000000920	12971878	12993640	7	12971878,12973068,12973138,12979596,12980018,12989520,12993479	12972001,12973135,12973191,12979804,12980231,12989723,12993640	1035	-	12954509-12971877	12993641-13003876
17:27107478|27111015	0	2.78358	2.29975	0	0	0	1.69444	0	-1.69444	0.229082	0.820938	exon	ENSOCUT00000013308	ENSOCUG00000013313	SLC30A4	solute carrier family 30 member 4	---	---	---	---	---	ENSOCUT00000013308	27107478	27111015	3	27107478,27109398,27110910	27107631,27109596,27111015	459	+	27089919-27107477	27111016-27112850
9:83555191|83557631	1.5665	1.5665	0	0	0	0	1.04434	0	-1.04434	0.415139	0.820938	exon	ENSOCUT00000009452	ENSOCUG00000009451	PIK3C3	phosphatidylinositol 3-kinase catalytic subunit type 3	---	---	---	---	---	ENSOCUT00000009452	83555191	83557631	2	83555191,83557541	83555345,83557631	246	+	83547582-83555190	83557632-83565182
7:171764296|171774016	0	0	0	0	1.5665	1.5665	0	1.04434	1.04434	0.404744	0.820938	exon	ENSOCUT00000030148	ENSOCUG00000016726	TRIP12	thyroid hormone receptor interactor 12	---	---	---	---	---	ENSOCUT00000030148	171764296	171774016	9	171764296,171766101,171767231,171768049,171769341,171770052,171770898,171771309,171773865	171764394,171766257,171767373,171768200,171769468,171770251,171770971,171771481,171774016	1278	-	171758233-171764295	171774017-171775659
13:104550751|104740025	1.5665	0	1.5665	0	0	0	1.04434	0	-1.04434	0.415139	0.820938	exon	ENSOCUT00000015785	ENSOCUG00000015766	PATJ	PATJ, crumbs cell polarity complex component	---	---	---	---	---	ENSOCUT00000015785	104550751	104740025	21	104550751,104567422,104575251,104586938,104591004,104613634,104626152,104639021,104641338,104648392,104673184,104683442,104688290,104707506,104710202,104714905,104719801,104721267,104725136,104727487,104739897	104550850,104567499,104575361,104587115,104591075,104613808,104626275,104639425,104641454,104648601,104673315,104683603,104688424,104707562,104710278,104715051,104719942,104721358,104725235,104727705,104740025	2962	-	104502469-104550750	104740026-104750715
18:49011636|49014822	0	3.67482	2.78358	0	0	1.5665	2.1528	0.522168	-1.63063	0.320702	0.820938	exon	ENSOCUT00000002730	ENSOCUG00000002728	SLF2	SMC5-SMC6 complex localization factor 2	---	---	---	---	---	ENSOCUT00000002730	49011636	49014822	3	49011636,49012184,49014765	49011679,49012920,49014822	839	+	49009124-49011635	49014823-49020724
9:99272932|99352938	1.5665	1.5665	1.5665	0	0	0	1.5665	0	-1.5665	0.276971	0.820938	exon_intron	ENSOCUT00000014398	ENSOCUG00000014396	ZNF532	zinc finger protein 532	---	---	---	---	---	ENSOCUT00000014398	99272932	99352938	6	99272932,99317633,99331999,99338396,99349073,99352657	99274829,99319995,99332180,99338572,99349235,99352938	5065	+	---	99352939-99382726
13:140369457|140369984	0	0	0	0	1.5665	2.29975	0	1.28875	1.28875	0.315196	0.820938	exon	ENSOCUT00000023643	ENSOCUG00000025623	LZIC	leucine zipper and CTNNBIP1 domain containing	---	---	---	---	---	ENSOCUT00000023643	140369457	140369984	2	140369457,140369886	140369592,140369984	235	+	140367466-140369456	140369985-140372160
13:37277999|37305285	0	1.5665	1.5665	0	0	0	1.04434	0	-1.04434	0.415139	0.820938	exon	ENSOCUT00000014991	ENSOCUG00000014986	ASH1L	ASH1 like histone lysine methyltransferase	---	---	---	---	---	ENSOCUT00000014991	37277999	37305285	3	37277999,37291988,37305191	37278740,37292167,37305285	1017	+	37264664-37277998	37305286-37333143
4:34762550|34764096	2.29975	1.5665	0	1.67902	3.67482	3.14526	1.28875	2.83303	1.54428	0.461416	0.820938	exon	ENSOCUT00000012024	ENSOCUG00000012013	DIP2B	disco interacting protein 2 homolog B	---	---	---	---	---	ENSOCUT00000012024	34762550	34764096	2	34762550,34764005	34762660,34764096	203	-	34759840-34762549	34764097-34765639
14:20701468|20726546	1.5665	0	1.5665	0	0	0	1.04434	0	-1.04434	0.415139	0.820938	exon	ENSOCUT00000017804	ENSOCUG00000017800	PDCD6IP	programmed cell death 6 interacting protein	---	---	---	---	---	ENSOCUT00000017804	20701468	20726546	8	20701468,20703290,20704831,20714616,20715947,20723168,20725193,20726452	20701690,20703413,20705008,20714727,20716116,20723416,20725327,20726546	1286	+	20697238-20701467	20726547-20738640
5:22939316|22952363	0	1.5665	1.5665	0	0	0	1.04434	0	-1.04434	0.415139	0.820938	exon	ENSOCUT00000010081	ENSOCUG00000010080	LRRC36	leucine rich repeat containing 36	---	---	---	---	---	ENSOCUT00000010081	22939316	22952363	2	22939316,22952236	22939404,22952363	217	+	22935113-22939315	22952364-22955048
9:59267156|59291622	0	0	0	1.67902	0	1.5665	0	1.08184	1.08184	0.392701	0.820938	exon	ENSOCUT00000016079	ENSOCUG00000000020	SMCHD1	structural maintenance of chromosomes flexible hinge domain containing 1	---	---	---	---	---	ENSOCUT00000016079	59267156	59291622	11	59267156,59271818,59272797,59279986,59281132,59283191,59283561,59284477,59286505,59290502,59291534	59267308,59271949,59272884,59280050,59281247,59283348,59283640,59284602,59286672,59290620,59291622	1294	-	59260648-59267155	59291623-59293354
20:30008736|30019381	1.5665	2.29975	1.5665	0	0	0	1.81092	0	-1.81092	0.22087	0.820938	exon	ENSOCUT00000010203	ENSOCUG00000010201	NEK9	NIMA related kinase 9	---	---	---	---	---	ENSOCUT00000010203	30008736	30019381	7	30008736,30010308,30013246,30015621,30016478,30018713,30019189	30008806,30010413,30013377,30015731,30016542,30018766,30019381	732	+	30007836-30008735	30019382-30021587
7:109664280|109666070	0	0	0	0	1.5665	1.5665	0	1.04434	1.04434	0.404744	0.820938	exon	ENSOCUT00000006645	ENSOCUG00000006646	UBR3	ubiquitin protein ligase E3 component n-recognin 3 (putative)	---	---	---	---	---	ENSOCUT00000006645	109664280	109666070	3	109664280,109664432,109665942	109664345,109664521,109666070	285	+	109652276-109664279	109666071-109666915
12:32807831|32810884	4.06133	2.29975	0	0	0	0	2.12036	0	-2.12036	0.180466	0.820938	exon	ENSOCUT00000032045	ENSOCUG00000002302	ZNF318	zinc finger protein 318	---	---	---	---	---	ENSOCUT00000032045	32807831	32810884	2	32807831,32810248	32809276,32810884	2083	-	32803954-32807830	32810885-32819353
13:8396364|8405724	0	0	0	0	1.5665	1.5665	0	1.04434	1.04434	0.404744	0.820938	exon	ENSOCUT00000009906	ENSOCUG00000009901	WDR60	WD repeat domain 60	---	---	---	---	---	ENSOCUT00000009906	8396364	8405724	4	8396364,8397832,8399125,8405622	8396452,8397943,8399254,8405724	434	-	8385038-8396363	8405725-8410534
2:160223750|160226812	0	3.14526	3.14526	0	0	0	2.09684	0	-2.09684	0.177083	0.820938	exon	ENSOCUT00000001250	ENSOCUG00000001249	DTNB	dystrobrevin beta	---	---	---	---	---	ENSOCUT00000001250	160223750	160226812	2	160223750,160226599	160223830,160226812	295	+	160215372-160223749	160226813-160247584
13:80999908|81023805	1.5665	0	1.5665	0	0	0	1.04434	0	-1.04434	0.415139	0.820938	exon	ENSOCUT00000008140	ENSOCUG00000008140	TTLL7	tubulin tyrosine ligase like 7	---	---	---	---	---	ENSOCUT00000008140	80999908	81023805	8	80999908,81000306,81002272,81003251,81007551,81012793,81018499,81023647	81000105,81000437,81002393,81003318,81007709,81013009,81018663,81023805	1220	+	---	81023806-81030494
13:20125059|20139493	0	0	0	2.43409	0	1.5665	0	1.33353	1.33353	0.301396	0.820938	exon	ENSOCUT00000007593	ENSOCUG00000007590	SUCO	SUN domain containing ossification factor	---	---	---	---	---	ENSOCUT00000007593	20125059	20139493	4	20125059,20126956,20138609,20139425	20125146,20128101,20138699,20139493	1394	-	20121440-20125058	20139494-20148009
13:10314579|10322003	2.29975	2.29975	0	0	0	0	1.53317	0	-1.53317	0.266927	0.820938	exon	ENSOCUT00000004073	ENSOCUG00000004071	---	---	---	---	---	---	---	ENSOCUT00000004073	10314579	10322003	5	10314579,10317387,10318341,10319906,10321680	10314711,10317508,10318508,10320016,10322003	858	-	10313010-10314578	10322004-10327545
4:84806844|84808313	2.29975	0	2.29975	0	0	0	1.53317	0	-1.53317	0.266927	0.820938	exon	ENSOCUT00000029463	ENSOCUG00000017672	TMEM184B	transmembrane protein 184B	---	---	---	---	---	ENSOCUT00000029463	84806844	84808313	2	84806844,84808148	84807093,84808313	416	+	84782014-84806843	84808314-84820176
19:3132008|3151157	0	0	0	0	1.5665	1.5665	0	1.04434	1.04434	0.404744	0.820938	exon	ENSOCUT00000013393	ENSOCUG00000013388	ULK2	unc-51 like autophagy activating kinase 2	---	---	---	---	---	ENSOCUT00000013393	3132008	3151157	7	3132008,3132478,3132990,3136735,3138867,3144531,3151097	3132111,3132665,3133276,3136815,3139012,3144668,3151157	1005	-	3127501-3132007	3151158-3158297
5:23696820|23705654	0	0	1.5665	1.67902	1.5665	2.78358	0.522168	2.0097	1.48753	0.413306	0.820938	exon	ENSOCUT00000010051	ENSOCUG00000010052	NFATC3	nuclear factor of activated T cells 3	---	---	---	---	---	ENSOCUT00000010051	23696820	23705654	2	23696820,23705482	23697019,23705654	373	+	23676252-23696819	23705655-23713630
18:14171899|14174628	0	0	0	1.67902	2.29975	0	0	1.32626	1.32626	0.308178	0.820938	exon	ENSOCUT00000007137	ENSOCUG00000007139	FAM149B1	family with sequence similarity 149 member B1	---	---	---	---	---	ENSOCUT00000007137	14171899	14174628	3	14171899,14172492,14174401	14172021,14172612,14174628	472	-	14169087-14171898	14174629-14177566
1:166033543|166065118	0	0	0	1.67902	0	1.5665	0	1.08184	1.08184	0.392701	0.820938	exon	ENSOCUT00000027245	ENSOCUG00000006085	BBOX1	gamma-butyrobetaine hydroxylase 1	---	---	---	---	---	ENSOCUT00000027245	166033543	166065118	3	166033543,166060249,166064922	166033741,166060354,166065118	502	+	166016942-166033542	166065119-166072366
15:92406022|92417689	1.5665	0	1.5665	0	0	0	1.04434	0	-1.04434	0.415139	0.820938	exon	ENSOCUT00000012229	ENSOCUG00000012226	SRP72	signal recognition particle 72	---	---	---	---	---	ENSOCUT00000012229	92406022	92417689	7	92406022,92406174,92408802,92410641,92410834,92413226,92417569	92406079,92406298,92408833,92410752,92410977,92413349,92417689	716	-	92403455-92406021	92417690-92420381
14:75026931|75030437	2.29975	1.5665	2.29975	1.67902	0	0	2.05533	0.559675	-1.49566	0.44671	0.820938	exon	ENSOCUT00000017883	ENSOCUG00000017883	ACTL6A	actin like 6A	---	---	---	---	---	ENSOCUT00000017883	75026931	75030437	4	75026931,75029448,75030156,75030348	75027028,75029542,75030262,75030437	390	+	75025753-75026930	75030438-75033158
11:59981095|59984797	0	0	0	0	1.5665	1.5665	0	1.04434	1.04434	0.404744	0.820938	exon	ENSOCUT00000028082,ENSOCUT00000012684	ENSOCUG00000012668	RICTOR	RPTOR independent companion of MTOR complex 2	---	---	---	---	---	ENSOCUT00000028082	59981095	59984797	3	59981095,59983431,59983789	59981272,59983502,59984797	1259	-	59979986-59981094	59984798-59988031
13:71826940|71829340	0	0	0	0	2.29975	1.5665	0	1.28875	1.28875	0.315196	0.820938	exon	ENSOCUT00000001807	ENSOCUG00000001807	EVI5	ecotropic viral integration site 5	---	---	---	---	---	ENSOCUT00000001807	71826940	71829340	3	71826940,71827754,71829266	71827129,71827978,71829340	490	+	71797989-71826939	71829341-71835671
2:90257136|90272009	1.5665	2.29975	1.5665	0	1.5665	0	1.81092	0.522168	-1.28875	0.49058	0.820938	exon	ENSOCUT00000006957	ENSOCUG00000006957	IL1R1	interleukin 1 receptor type 1	---	---	---	---	---	ENSOCUT00000006957	90257136	90272009	8	90257136,90258001,90259940,90260829,90266459,90269851,90271489,90271775	90257303,90258144,90260091,90260946,90266524,90270019,90271678,90272009	1242	-	90255534-90257135	90272010-90277782
3:25237267|25247081	2.29975	1.5665	1.5665	0	1.5665	0	1.81092	0.522168	-1.28875	0.49058	0.820938	exon	ENSOCUT00000011676	ENSOCUG00000011676	NR3C1	glucocorticoid receptor	---	---	---	---	---	ENSOCUT00000011676	25237267	25247081	4	25237267,25241095,25241974,25246965	25237397,25241239,25242252,25247081	672	-	25231575-25237266	25247082-25253023
3:14863423|14878026	0	0	0	0	1.5665	2.29975	0	1.28875	1.28875	0.315196	0.820938	exon	ENSOCUT00000027139	ENSOCUG00000024304	FNIP1	folliculin interacting protein 1	---	---	---	---	---	ENSOCUT00000027139	14863423	14878026	2	14863423,14877900	14863557,14878026	262	-	14852514-14863422	14878027-14928079
15:95952058|95959296	1.5665	0	2.29975	0	0	0	1.28875	0	-1.28875	0.324028	0.820938	exon	ENSOCUT00000013457	ENSOCUG00000013454	PRDM5	PR/SET domain 5	---	---	---	---	---	ENSOCUT00000013457	95952058	95959296	3	95952058,95954059,95959217	95952215,95954143,95959296	323	-	95930103-95952057	95959297-95965055
10:36492447|36506658	0	1.5665	2.29975	0	0	0	1.28875	0	-1.28875	0.324028	0.820938	exon	ENSOCUT00000004581	ENSOCUG00000004576	ANKIB1	ankyrin repeat and IBR domain containing 1	---	---	---	---	---	ENSOCUT00000004581	36492447	36506658	2	36492447,36506382	36492747,36506658	578	-	36480684-36492446	36506659-36514520
7:15156272|15159395	2.29975	2.29975	0	0	0	0	1.53317	0	-1.53317	0.266927	0.820938	exon	ENSOCUT00000011750	ENSOCUG00000011749	AHCYL2	adenosylhomocysteinase like 2	---	---	---	---	---	ENSOCUT00000011750	15156272	15159395	3	15156272,15158789,15159332	15156342,15158877,15159395	224	-	15151865-15156271	15159396-15163659
5:2240434|2243004	2.29975	0	3.14526	0	1.5665	0	1.815	0.522168	-1.29284	0.417322	0.820938	exon	ENSOCUT00000009413	ENSOCUG00000009410	SIPA1L3	signal induced proliferation associated 1 like 3	---	---	---	---	---	ENSOCUT00000009413	2240434	2243004	2	2240434,2242577	2240552,2243004	547	+	2235680-2240433	2243005-2256781
1:97523225|97527582	2.29975	1.5665	0	0	0	0	1.28875	0	-1.28875	0.324028	0.820938	exon	ENSOCUT00000025315	ENSOCUG00000005196	ARHGEF12	Rho guanine nucleotide exchange factor 12	---	---	---	---	---	ENSOCUT00000025315	97523225	97527582	3	97523225,97525980,97527477	97523357,97526192,97527582	452	-	97522248-97523224	97527583-97528663
12:106490844|106492043	0	0	0	2.43409	1.5665	1.5665	0	1.8557	1.8557	0.204737	0.820938	exon	ENSOCUT00000003162	ENSOCUG00000003157	DCBLD1	discoidin, CUB and LCCL domain containing 1	---	---	---	---	---	ENSOCUT00000003162	106490844	106492043	2	106490844,106491828	106490884,106492043	257	+	106487140-106490843	106492044-106493222
19:4409587|4414638	1.5665	0	0	0	3.14526	2.29975	0.522168	1.815	1.29284	0.414194	0.820938	exon	ENSOCUT00000000497	ENSOCUG00000000498	TVP23B	---	---	---	---	---	---	ENSOCUT00000000497	4409587	4414638	3	4409587,4410892,4414510	4409676,4411023,4414638	351	+	4403088-4409586	4414639-4417525
13:31886524|31886840	0	0	0	3.29403	2.78358	2.29975	0	2.79245	2.79245	0.0963636	0.820938	exon	ENSOCUT00000002378	ENSOCUG00000002378	PFDN2	prefoldin subunit 2	---	---	---	---	---	ENSOCUT00000002378	31886524	31886840	2	31886524,31886717	31886612,31886840	213	+	31871020-31886523	31886841-31888022
1:107919136|107922015	0	0	0	2.9272	1.5665	0	0	1.4979	1.4979	0.258348	0.820938	exon	ENSOCUT00000003846	ENSOCUG00000003843	DDX10	DEAD-box helicase 10	---	---	---	---	---	ENSOCUT00000003846	107919136	107922015	3	107919136,107920691,107921857	107919325,107920811,107922015	470	-	107912946-107919135	107922016-107923309
3:78944922|78958247	3.4342	2.78358	1.5665	1.67902	0	0	2.59476	0.559675	-2.03509	0.290993	0.820938	exon	ENSOCUT00000008722	ENSOCUG00000008723	YTHDF3	YTH N6-methyladenosine RNA binding protein 3	---	---	---	---	---	ENSOCUT00000008722	78944922	78958247	2	78944922,78956649	78945037,78958247	1715	+	78939056-78944921	78958248-78981366
14:30304536|30388980	0	0	0	1.67902	1.5665	0	0	1.08184	1.08184	0.392701	0.820938	exon	ENSOCUT00000012751	ENSOCUG00000012746	STAG1	stromal antigen 1	---	---	---	---	---	ENSOCUT00000012751	30304536	30388980	5	30304536,30329832,30353995,30379312,30388872	30304612,30329928,30354159,30379414,30388980	551	-	30259971-30304535	---
14:31867244|31880484	0	0	0	1.67902	0	1.5665	0	1.08184	1.08184	0.392701	0.820938	exon	ENSOCUT00000015140	ENSOCUG00000015134	ARMC8	armadillo repeat containing 8	---	---	---	---	---	ENSOCUT00000015140	31867244	31880484	4	31867244,31878099,31880142,31880387	31867320,31878170,31880284,31880484	390	+	31840657-31867243	31880485-31885484
17:54855548|54857284	1.5665	0	1.5665	0	0	0	1.04434	0	-1.04434	0.415139	0.820938	exon	ENSOCUT00000016663	ENSOCUG00000016663	---	---	---	---	---	---	---	ENSOCUT00000016663	54855548	54857284	2	54855548,54857152	54855595,54857284	181	+	54853814-54855547	54857285-54894642
4:84663254|84667462	0	0	0	0	3.4342	2.29975	0	1.91132	1.91132	0.189728	0.820938	exon	ENSOCUT00000004982	ENSOCUG00000004982	DDX17	DEAD-box helicase 17	---	---	---	---	---	ENSOCUT00000004982	84663254	84667462	7	84663254,84663594,84665061,84665525,84665774,84667079,84667401	84663387,84663659,84665202,84665685,84665946,84667189,84667462	849	+	84662724-84663253	84667463-84668120
4:16570057|16573282	2.78358	2.29975	0	1.67902	0	0	1.69444	0.559675	-1.13477	0.491897	0.820938	exon	ENSOCUT00000015451	ENSOCUG00000015450	RIN2	Ras and Rab interactor 2	---	---	---	---	---	ENSOCUT00000015451	16570057	16573282	3	16570057,16571163,16573191	16571161,16571191,16573282	1226	-	16558126-16570056	16573283-16578357
7:76396193|76398808	0	0	1.5665	0	3.4342	1.5665	0.522168	1.6669	1.14473	0.417915	0.820938	exon	ENSOCUT00000006942	ENSOCUG00000006944	SPOPL	speckle type BTB/POZ protein like	---	---	---	---	---	ENSOCUT00000006942	76396193	76398808	4	76396193,76396517,76396898,76398681	76396328,76396638,76397049,76398808	538	+	---	76398809-76410420
15:93345928|93352469	0	0	0	1.67902	0	2.78358	0	1.48753	1.48753	0.257503	0.820938	exon	ENSOCUT00000021439	ENSOCUG00000022350	CLOCK	clock circadian regulator	---	---	---	---	---	ENSOCUT00000021439	93345928	93352469	4	93345928,93347641,93348870,93352378	93346017,93347700,93349018,93352469	391	+	93338223-93345927	93352470-93360696
4:44079965|44082665	1.5665	0	2.29975	0	0	0	1.28875	0	-1.28875	0.324028	0.820938	exon	ENSOCUT00000033681,ENSOCUT00000000776	ENSOCUG00000000776	LEMD3	LEM domain containing 3	---	---	---	---	---	ENSOCUT00000000776	44079965	44082665	4	44079965,44080127,44082352,44082563	44080044,44080272,44082453,44082665	431	+	44065063-44079964	44082666-44083581
1:52455947|52460406	1.5665	1.5665	0	0	0	0	1.04434	0	-1.04434	0.415139	0.820938	exon	ENSOCUT00000022037	ENSOCUG00000006320	SMARCA2	SWI/SNF related, matrix associated, actin dependent regulator of chromatin, subfamily a, member 2	---	---	---	---	---	ENSOCUT00000022037	52455947	52460406	4	52455947,52457479,52460026,52460276	52456094,52457579,52460083,52460406	438	-	52453396-52455946	52460407-52463717
19:28137627|28144431	0	0	0	0	1.5665	1.5665	0	1.04434	1.04434	0.404744	0.820938	exon	ENSOCUT00000006716	ENSOCUG00000006709	MED13	mediator complex subunit 13	---	---	---	---	---	ENSOCUT00000006716	28137627	28144431	4	28137627,28141040,28143977,28144273	28137800,28141188,28144162,28144431	668	-	28132690-28137626	28144432-28145443
16:62868169|62875196	0	0	0	1.67902	0	2.29975	0	1.32626	1.32626	0.308178	0.820938	exon	ENSOCUT00000004034	ENSOCUG00000004035	IRF6	interferon regulatory factor 6	---	---	---	---	---	ENSOCUT00000004034	62868169	62875196	4	62868169,62868781,62873843,62875068	62868252,62868957,62874047,62875196	595	+	62863649-62868168	62875197-62878966
3:17512588|17514762	0	0	0	0	1.5665	2.29975	0	1.28875	1.28875	0.315196	0.820938	exon	ENSOCUT00000012212	ENSOCUG00000012206	DDX46	DEAD-box helicase 46	---	---	---	---	---	ENSOCUT00000012212	17512588	17514762	3	17512588,17513580,17514641	17512708,17513755,17514762	419	+	17511703-17512587	17514763-17519007
18:5980748|5983772	0	0	0	1.67902	1.5665	0	0	1.08184	1.08184	0.392701	0.820938	exon	ENSOCUT00000031234	ENSOCUG00000027851	PARG	poly(ADP-ribose) glycohydrolase	---	---	---	---	---	ENSOCUT00000031234	5980748	5983772	3	5980748,5981839,5983706	5980931,5982822,5983772	1235	-	5974279-5980747	5983773-5991229
17:36878976|36883313	2.29975	0	1.5665	0	0	0	1.28875	0	-1.28875	0.324028	0.820938	exon	ENSOCUT00000003948	ENSOCUG00000003945	DPH6	diphthamine biosynthesis 6	---	---	---	---	---	ENSOCUT00000003948	36878976	36883313	2	36878976,36883195	36879049,36883313	193	+	36792709-36878975	36883314-36941763
1:155187220|155215621	1.5665	3.67482	1.5665	0	0	0	2.26927	0	-2.26927	0.125149	0.820938	exon	ENSOCUT00000005949	ENSOCUG00000005952	BTBD10	BTB domain containing 10	---	---	---	---	---	ENSOCUT00000005949	155187220	155215621	5	155187220,155189137,155191612,155194477,155215464	155187340,155189239,155191897,155194673,155215621	865	-	155182457-155187219	---
20:23940116|23966228	1.5665	0	1.5665	0	0	0	1.04434	0	-1.04434	0.415139	0.820938	exon	ENSOCUT00000028169	ENSOCUG00000012416	STON2	stonin 2	---	---	---	---	---	ENSOCUT00000028169	23940116	23966228	3	23940116,23942458,23966037	23940388,23942733,23966228	741	+	23888930-23940115	23966229-24057908
3:115106970|115177360	0	1.5665	2.29975	0	0	0	1.28875	0	-1.28875	0.324028	0.820938	exon	ENSOCUT00000008743	ENSOCUG00000008725	VPS13B	vacuolar protein sorting 13 homolog B	---	---	---	---	---	ENSOCUT00000008743	115106970	115177360	8	115106970,115128490,115138243,115157960,115158620,115161315,115165122,115177249	115107204,115128710,115138446,115158131,115158734,115161381,115165530,115177360	1535	+	115084451-115106969	115177361-115220551
5:30275544|30276635	0	1.5665	1.5665	0	0	0	1.04434	0	-1.04434	0.415139	0.820938	exon	ENSOCUT00000022348	ENSOCUG00000015553	KARS	lysyl-tRNA synthetase	---	---	---	---	---	ENSOCUT00000022348	30275544	30276635	2	30275544,30276476	30275709,30276635	326	-	30272715-30275543	30276636-30281433
12:47056585|47067520	1.5665	0	1.5665	0	0	0	1.04434	0	-1.04434	0.415139	0.820938	exon	ENSOCUT00000004811	ENSOCUG00000004809	ZNF451	zinc finger protein 451	---	---	---	---	---	ENSOCUT00000004811	47056585	47067520	3	47056585,47060058,47067370	47056710,47060169,47067520	389	+	47032917-47056584	47067521-47069443
16:3698185|3720384	0	1.5665	1.5665	0	0	0	1.04434	0	-1.04434	0.415139	0.820938	exon	ENSOCUT00000015957	ENSOCUG00000015950	ARHGAP12	Rho GTPase activating protein 12	---	---	---	---	---	ENSOCUT00000015957	3698185	3720384	6	3698185,3699326,3711129,3713963,3717140,3720303	3698325,3699406,3711254,3714037,3717201,3720384	567	+	3691308-3698184	3720385-3726377
1:64643481|64652366	1.5665	1.5665	1.5665	0	0	0	1.5665	0	-1.5665	0.276971	0.820938	exon	ENSOCUT00000029126,ENSOCUT00000007760	ENSOCUG00000007758	CEP78	centrosomal protein 78	---	---	---	---	---	ENSOCUT00000007760	64643481	64652366	3	64643481,64650456,64652238	64643616,64650501,64652366	311	+	64639152-64643480	64652367-64666257
1:12954342|12974365	1.5665	0	0	1.67902	0	3.14526	0.522168	1.60809	1.08593	0.459488	0.820938	exon	ENSOCUT00000004235	ENSOCUG00000004233	INVS	inversin	---	---	---	---	---	ENSOCUT00000004235	12954342	12974365	6	12954342,12964367,12964996,12968343,12971868,12974185	12954448,12964596,12965151,12968514,12971977,12974365	956	-	12947127-12954341	12974366-12982968
20:14078690|14089393	0	0	3.4342	0	0	0	1.14473	0	-1.14473	0.294414	0.820938	exon	ENSOCUT00000014293	ENSOCUG00000014292	TC2N	tandem C2 domains, nuclear	---	---	---	---	---	ENSOCUT00000014293	14078690	14089393	7	14078690,14080163,14084809,14086206,14088169,14088785,14089277	14078812,14080396,14084973,14086297,14088244,14088885,14089393	908	+	---	14089394-14092786
20:4466574|4467692	0	0	0	1.67902	0	1.5665	0	1.08184	1.08184	0.392701	0.820938	exon	ENSOCUT00000000596	ENSOCUG00000000593	ZFYVE26	zinc finger FYVE-type containing 26	---	---	---	---	---	ENSOCUT00000000596	4466574	4467692	3	4466574,4466799,4467474	4466690,4466963,4467692	501	+	4465082-4466573	4467693-4469792
8:44988132|44989160	0	1.5665	2.29975	0	0	0	1.28875	0	-1.28875	0.324028	0.820938	exon	ENSOCUT00000014532	ENSOCUG00000014529	PARP4	poly(ADP-ribose) polymerase family member 4	---	---	---	---	---	ENSOCUT00000014532	44988132	44989160	3	44988132,44988346,44988996	44988210,44988392,44989160	291	-	44982973-44988131	44989161-44998688
14:1330084|1341938	2.29975	0	1.5665	0	0	0	1.28875	0	-1.28875	0.324028	0.820938	exon	ENSOCUT00000007288	ENSOCUG00000007287	CAPN7	calpain 7	---	---	---	---	---	ENSOCUT00000007288	1330084	1341938	5	1330084,1336598,1337746,1339564,1341852	1330192,1336755,1337813,1339764,1341938	623	+	1321415-1330083	1341939-1349652
15:22411076|22453741	2.29975	1.5665	0	0	0	0	1.28875	0	-1.28875	0.324028	0.820938	exon	ENSOCUT00000005899	ENSOCUG00000005896	INPP4B	inositol polyphosphate-4-phosphatase type II B	---	---	---	---	---	ENSOCUT00000005899	22411076	22453741	6	22411076,22442135,22443750,22444884,22449190,22453644	22411232,22442307,22443873,22445001,22449330,22453741	811	+	22395434-22411075	22453742-22478231
X:103881708|103931761	0	0	0	0	2.29975	1.5665	0	1.28875	1.28875	0.315196	0.820938	exon	ENSOCUT00000001047	ENSOCUG00000001047	SMARCA1	SWI/SNF related, matrix associated, actin dependent regulator of chromatin, subfamily a, member 1	---	---	---	---	---	ENSOCUT00000001047	103881708	103931761	15	103881708,103882069,103890367,103896790,103900390,103904654,103908504,103911789,103913922,103922301,103923678,103925309,103928601,103931460,103931661	103881821,103882179,103890486,103896938,103900522,103904806,103908625,103912015,103914031,103922369,103923809,103925464,103928780,103931560,103931761	1978	-	103867979-103881707	103931762-103932457
2:116004004|116004800	3.14526	1.5665	2.29975	0	1.5665	0	2.33717	0.522168	-1.815	0.330433	0.820938	exon	ENSOCUT00000011203	ENSOCUG00000011204	TIA1	TIA1 cytotoxic granule associated RNA binding protein	---	---	---	---	---	ENSOCUT00000011203	116004004	116004800	3	116004004,116004508,116004716	116004112,116004603,116004800	290	+	115999016-116004003	116004801-116005460
13:114179489|114211825	0	0	0	3.29403	0	0	0	1.09801	1.09801	0.307228	0.820938	exon	ENSOCUT00000034025	ENSOCUG00000002390	ZCCHC11	zinc finger CCHC-type containing 11	---	---	---	---	---	ENSOCUT00000034025	114179489	114211825	6	114179489,114190213,114196531,114207855,114210850,114211774	114180355,114190376,114196647,114208032,114210938,114211825	1467	+	---	114211826-114216914
11:22419561|22432863	0	0	0	1.67902	0	1.5665	0	1.08184	1.08184	0.392701	0.820938	exon	ENSOCUT00000001602	ENSOCUG00000001598	PAM	peptidylglycine alpha-amidating monooxygenase	---	---	---	---	---	ENSOCUT00000001602	22419561	22432863	5	22419561,22422350,22428854,22431953,22432675	22419660,22422403,22429057,22432006,22432863	601	+	22413854-22419560	---
2:64115810|64118978	0	1.5665	1.5665	0	0	0	1.04434	0	-1.04434	0.415139	0.820938	exon	ENSOCUT00000027561,ENSOCUT00000001443	ENSOCUG00000001439	FAT1	FAT atypical cadherin 1	---	---	---	---	---	ENSOCUT00000001443	64115810	64118978	4	64115810,64116076,64118085,64118835	64115947,64116877,64118282,64118978	1282	-	64113699-64115809	64118979-64121977
13:3122748|3163141	0	0	0	0	3.14526	0	0	1.04842	1.04842	0.327414	0.820938	exon	ENSOCUT00000005468	ENSOCUG00000005463	COP1	COP1, E3 ubiquitin ligase	---	---	---	---	---	ENSOCUT00000005468	3122748	3163141	6	3122748,3124953,3127521,3154294,3162584,3163033	3122908,3125077,3127638,3154410,3162665,3163141	712	-	3095021-3122747	3163142-3166593
4:83138479|83139064	0	0	0	1.67902	1.5665	0	0	1.08184	1.08184	0.392701	0.820938	exon	ENSOCUT00000016310	ENSOCUG00000016313	TDG	thymine DNA glycosylase	---	---	---	---	---	ENSOCUT00000016310	83138479	83139064	3	83138479,83138807,83138970	83138614,83138889,83139064	314	+	83135811-83138478	83139065-83141224
11:81811543|81813074	0	0	0	0	1.5665	1.5665	0	1.04434	1.04434	0.404744	0.820938	exon	ENSOCUT00000009409	ENSOCUG00000009409	---	---	---	---	---	---	---	ENSOCUT00000009409	81811543	81813074	2	81811543,81812974	81811741,81813074	300	+	81809089-81811542	81813075-81817064
4:15407402|15450522	2.29975	1.5665	0	0	0	0	1.28875	0	-1.28875	0.324028	0.820938	exon	ENSOCUT00000013853	ENSOCUG00000013848	KIZ	kizuna centrosomal protein	---	---	---	---	---	ENSOCUT00000013853	15407402	15450522	4	15407402,15409767,15421096,15450204	15407467,15409932,15421183,15450522	639	-	15394639-15407401	15450523-15451825
15:13958702|14088792	0	1.5665	0	2.43409	2.29975	2.29975	0.522168	2.34453	1.82236	0.353577	0.820938	exon	ENSOCUT00000021781	ENSOCUG00000022271	---	---	---	---	---	---	---	ENSOCUT00000021781	13958702	14088792	8	13958702,13961903,13968599,13973198,13997313,13998463,14017880,14088625	13958819,13962005,13968714,13973310,13997453,13998582,14018032,14088792	1032	+	13873321-13958701	14088793-14090565
2:131170685|131212733	0	0	1.5665	2.43409	0	2.78358	0.522168	1.73922	1.21705	0.450505	0.820938	exon	ENSOCUT00000012042	ENSOCUG00000012044	EML6	echinoderm microtubule associated protein like 6	---	---	---	---	---	ENSOCUT00000012042	131170685	131212733	9	131170685,131170924,131192477,131197388,131202570,131202869,131207676,131212217,131212622	131170811,131171125,131192653,131197476,131202701,131203021,131207817,131212344,131212733	1262	-	131150890-131170684	131212734-131215868
10:34384178|34429445	0	0	0	1.67902	0	1.5665	0	1.08184	1.08184	0.392701	0.820938	exon	ENSOCUT00000012300	ENSOCUG00000012292	CASD1	CAS1 domain containing 1	---	---	---	---	---	ENSOCUT00000012300	34384178	34429445	16	34384178,34389166,34390041,34391812,34394776,34396637,34397762,34405104,34406214,34408668,34410241,34411138,34416178,34417815,34428725,34429349	34384270,34389243,34390181,34391913,34394855,34396793,34397881,34405193,34406636,34408882,34410364,34411182,34416240,34417859,34428845,34429445	1994	-	34383331-34384177	---
18:39857330|39866253	0	1.5665	0	1.67902	1.5665	2.78358	0.522168	2.0097	1.48753	0.413306	0.820938	exon	ENSOCUT00000010446	ENSOCUG00000010433	BTAF1	B-TFIID TATA-box binding protein associated factor 1	---	---	---	---	---	ENSOCUT00000010446	39857330	39866253	7	39857330,39861506,39863519,39863916,39865289,39865885,39866077	39857493,39861642,39863648,39863984,39865378,39865980,39866253	863	+	39856580-39857329	39866254-39871641
3:62135780|62138180	2.29975	2.78358	1.5665	2.43409	3.88098	4.83117	2.21661	3.71541	1.4988	0.394388	0.820938	exon	ENSOCUT00000001692	ENSOCUG00000001687	SPIDR	scaffolding protein involved in DNA repair	---	---	---	---	---	ENSOCUT00000001692	62135780	62138180	2	62135780,62137930	62135975,62138180	447	+	62026830-62135779	62138181-62221308
10:32980997|33000916	0	0	0	1.67902	0	1.5665	0	1.08184	1.08184	0.392701	0.820938	exon	ENSOCUT00000009957	ENSOCUG00000009953	SLC25A13	solute carrier family 25 member 13	---	---	---	---	---	ENSOCUT00000009957	32980997	33000916	7	32980997,32992937,32995325,32996200,32996508,33000269,33000758	32981136,32993083,32995463,32996293,32996592,33000353,33000916	849	+	32953802-32980996	33000917-33013294
3:117795283|117799901	0	0	0	1.67902	1.5665	0	0	1.08184	1.08184	0.392701	0.820938	exon	ENSOCUT00000008570	ENSOCUG00000008549	UBR5	ubiquitin protein ligase E3 component n-recognin 5	---	---	---	---	---	ENSOCUT00000008570	117795283	117799901	5	117795283,117797650,117797833,117799562,117799681	117795526,117797748,117797954,117799563,117799901	688	-	117793703-117795282	117799902-117801149
14:158383531|158393894	1.5665	1.5665	0	0	0	0	1.04434	0	-1.04434	0.415139	0.820938	exon	ENSOCUT00000034105,ENSOCUT00000007781	ENSOCUG00000007779	USP16	ubiquitin specific peptidase 16	---	---	---	---	---	ENSOCUT00000007781	158383531	158393894	9	158383531,158385120,158386120,158386805,158387966,158388404,158390482,158392167,158393838	158383634,158385223,158386307,158386900,158388096,158388491,158390560,158392258,158393894	939	+	158378039-158383530	158393895-158395965
8:97781463|97809460	0	2.29975	1.5665	0	0	0	1.28875	0	-1.28875	0.324028	0.820938	exon	ENSOCUT00000017637	ENSOCUG00000017627	UGGT2	UDP-glucose glycoprotein glucosyltransferase 2	---	---	---	---	---	ENSOCUT00000017637	97781463	97809460	7	97781463,97782961,97784011,97788919,97792130,97800270,97809382	97781619,97783038,97784030,97788979,97792229,97800370,97809460	596	-	97762570-97781462	97809461-97817244
2:41866191|41879848	0	0	0	0	1.5665	1.5665	0	1.04434	1.04434	0.404744	0.820938	exon	ENSOCUT00000009930	ENSOCUG00000009932	ESCO2	establishment of sister chromatid cohesion N-acetyltransferase 2	---	---	---	---	---	ENSOCUT00000009930	41866191	41879848	6	41866191,41867322,41870979,41872830,41876727,41879758	41866334,41867411,41871110,41872950,41876784,41879848	636	-	41856285-41866190	41879849-41887616
8:44586159|44614452	1.5665	1.5665	1.5665	0	0	0	1.5665	0	-1.5665	0.276971	0.820938	exon	ENSOCUT00000017090	ENSOCUG00000017086	ZMYM2	zinc finger MYM-type containing 2	---	---	---	---	---	ENSOCUT00000017090	44586159	44614452	9	44586159,44589063,44591760,44595140,44595694,44600529,44611121,44611980,44614167	44586331,44589213,44591876,44595255,44595844,44600600,44611333,44612145,44614452	1445	-	44574966-44586158	44614453-44620493
3:62440329|62449505	2.29975	2.29975	2.29975	0	1.5665	0	2.29975	0.522168	-1.77758	0.366776	0.820938	exon	ENSOCUT00000033933,ENSOCUT00000001706	ENSOCUG00000001693	PRKDC	protein kinase, DNA-activated, catalytic polypeptide	---	---	---	---	---	ENSOCUT00000001706	62440329	62449505	5	62440329,62441584,62444278,62448819,62449386	62440492,62441674,62444384,62448978,62449505	642	-	62437643-62440328	62449506-62450228
10:42950324|42999379	2.29975	1.5665	2.29975	0	0	1.5665	2.05533	0.522168	-1.53317	0.420727	0.820938	exon_intron	ENSOCUT00000012017	ENSOCUG00000012016	SEMA3D	semaphorin 3D	---	---	---	---	---	ENSOCUT00000012017	42950324	42999379	2	42950324,42999219	42978423,42999379	28261	+	---	42999380-43018975
19:25673583|25674560	0	0	0	1.67902	1.5665	0	0	1.08184	1.08184	0.392701	0.820938	exon	ENSOCUT00000014488	ENSOCUG00000014453	ACACA	acetyl-CoA carboxylase alpha	---	---	---	---	---	ENSOCUT00000014488	25673583	25674560	2	25673583,25674457	25673733,25674560	255	+	25668092-25673582	25674561-25677252
1:19828833|19865952	1.5665	0	1.5665	0	0	0	1.04434	0	-1.04434	0.415139	0.820938	exon_intron	ENSOCUT00000002575	ENSOCUG00000002573	UBAP2	ubiquitin associated protein 2	---	---	---	---	---	ENSOCUT00000002575	19828833	19865952	7	19828833,19841556,19844133,19848830,19851508,19864152,19865849	19828972,19841633,19844243,19848983,19851585,19864206,19865952	720	+	---	19865953-19872464
11:16885754|16891028	0	1.5665	1.5665	0	0	0	1.04434	0	-1.04434	0.415139	0.820938	exon	ENSOCUT00000001656	ENSOCUG00000001656	RIOK2	RIO kinase 2	---	---	---	---	---	ENSOCUT00000001656	16885754	16891028	3	16885754,16887952,16890853	16885945,16888040,16891028	457	-	16883195-16885753	16891029-16895191
13:137688633|137701190	1.5665	1.5665	2.29975	0	0	0	1.81092	0	-1.81092	0.22087	0.820938	exon	ENSOCUT00000013594,ENSOCUT00000031434	ENSOCUG00000013594	STX12	syntaxin 12	---	---	---	---	---	ENSOCUT00000013594	137688633	137701190	4	137688633,137690735,137697392,137701121	137688676,137690872,137697491,137701190	352	-	137685987-137688632	137701191-137713231
14:55804906|55816595	0	3.14526	1.5665	0	0	1.5665	1.57059	0.522168	-1.04842	0.468757	0.820938	exon	ENSOCUT00000017455	ENSOCUG00000017454	NMD3	NMD3 ribosome export adaptor	---	---	---	---	---	ENSOCUT00000017455	55804906	55816595	8	55804906,55807230,55810216,55811691,55812112,55813098,55813870,55816478	55805040,55807326,55810296,55811819,55812202,55813176,55813966,55816595	827	+	55802737-55804905	55816596-55819436
19:26519286|26548948	0	0	3.14526	0	0	0	1.04842	0	-1.04842	0.334534	0.820938	exon	ENSOCUT00000009408	ENSOCUG00000009402	USP32	ubiquitin specific peptidase 32	---	---	---	---	---	ENSOCUT00000009408	26519286	26548948	13	26519286,26520718,26528295,26536868,26538144,26541451,26541896,26543238,26545205,26545570,26546885,26547741,26548794	26519406,26520804,26528479,26537079,26538255,26541602,26542070,26543411,26545310,26545708,26546959,26547822,26548948	1775	-	26513815-26519285	26548949-26552595
8:13447202|13450680	0	2.29975	2.78358	1.67902	0	0	1.69444	0.559675	-1.13477	0.491897	0.820938	exon	ENSOCUT00000010759	ENSOCUG00000010741	ITPR2	inositol 1,4,5-trisphosphate receptor type 2	---	---	---	---	---	ENSOCUT00000010759	13447202	13450680	4	13447202,13447629,13448023,13450585	13447300,13447712,13448169,13450680	426	+	13441504-13447201	13450681-13469149
1:34764885|34776251	0	0	0	0	1.5665	2.78358	0	1.45003	1.45003	0.261483	0.820938	exon	ENSOCUT00000003512	ENSOCUG00000003507	HAUS6	HAUS augmin like complex subunit 6	---	---	---	---	---	ENSOCUT00000003512	34764885	34776251	6	34764885,34767947,34770089,34772408,34775823,34776203	34764980,34768025,34770221,34772552,34775888,34776251	568	+	34761932-34764884	34776252-34779204
2:90575879|90576821	0	0	0	0	1.5665	1.5665	0	1.04434	1.04434	0.404744	0.820938	exon	ENSOCUT00000008192	ENSOCUG00000008180	MAP4K4	mitogen-activated protein kinase kinase kinase kinase 4	---	---	---	---	---	ENSOCUT00000008192	90575879	90576821	2	90575879,90576735	90576013,90576821	222	-	90575169-90575878	90576822-90580626
13:8548783|8551166	3.67482	1.5665	1.5665	0	2.29975	0	2.26927	0.766583	-1.50269	0.487857	0.820938	exon	ENSOCUT00000025663	ENSOCUG00000002976	ESYT2	extended synaptotagmin 2	---	---	---	---	---	ENSOCUT00000025663	8548783	8551166	2	8548783,8551068	8549156,8551166	473	+	8546390-8548782	8551167-8553020
8:44611121|44612145	1.5665	0	2.29975	0	0	0	1.28875	0	-1.28875	0.324028	0.820938	exon	ENSOCUT00000017090	ENSOCUG00000017086	ZMYM2	zinc finger MYM-type containing 2	---	---	---	---	---	ENSOCUT00000017090	44611121	44612145	2	44611121,44611980	44611333,44612145	379	-	44600601-44611120	44612146-44614166
9:5945537|5959888	0	0	0	0	1.5665	1.5665	0	1.04434	1.04434	0.404744	0.820938	exon	ENSOCUT00000033203,ENSOCUT00000008955	ENSOCUG00000008949	TXNRD3	thioredoxin reductase 3	---	---	---	---	---	ENSOCUT00000008955	5945537	5959888	9	5945537,5946854,5948189,5949705,5953128,5955222,5955534,5957654,5959828	5945629,5947079,5948304,5949847,5953247,5955294,5955638,5957763,5959888	1047	-	5937206-5945536	5959889-5966499
13:44092639|44140507	2.78358	0	1.5665	0	0	0	1.45003	0	-1.45003	0.271531	0.820938	exon	ENSOCUT00000026604	ENSOCUG00000016565	---	---	---	---	---	---	---	ENSOCUT00000026604	44092639	44140507	4	44092639,44102526,44105725,44140426	44092761,44102861,44105984,44140507	801	-	44069887-44092638	44140508-44186304
1:21064389|21065705	0	0	0	2.43409	1.5665	0	0	1.33353	1.33353	0.301396	0.820938	exon	ENSOCUT00000015998	ENSOCUG00000015960	ACO1	cytoplasmic aconitate hydratase	---	---	---	---	---	ENSOCUT00000015998	21064389	21065705	2	21064389,21065537	21064526,21065705	307	-	21055450-21064388	21065706-21067400
13:114207855|114253490	2.29975	0	2.29975	0	0	0	1.53317	0	-1.53317	0.266927	0.820938	exon	ENSOCUT00000002399,ENSOCUT00000034025	ENSOCUG00000002390	ZCCHC11	zinc finger CCHC-type containing 11	---	---	---	---	---	ENSOCUT00000002399	114207855	114253490	16	114207855,114210850,114211774,114216915,114220414,114226301,114226580,114230897,114231611,114235714,114242493,114245369,114248994,114249148,114249528,114253377	114208032,114210938,114211825,114216984,114220540,114226420,114226792,114231071,114232305,114235864,114242579,114245472,114249051,114249251,114249617,114253490	2427	+	114196648-114207854	114253491-114261153
12:111555124|111556963	0	0	0	1.67902	2.29975	0	0	1.32626	1.32626	0.308178	0.820938	exon	ENSOCUT00000023013	ENSOCUG00000025991	HSF2	heat shock transcription factor 2	---	---	---	---	---	ENSOCUT00000023013	111555124	111556963	3	111555124,111555708,111556858	111555272,111555947,111556963	495	+	111553331-111555123	111556964-111561426
13:25555918|25627195	1.5665	2.29975	0	0	0	0	1.28875	0	-1.28875	0.324028	0.820938	exon	ENSOCUT00000031494	ENSOCUG00000015479	POU2F1	POU class 2 homeobox 1	---	---	---	---	---	ENSOCUT00000031494	25555918	25627195	14	25555918,25556735,25566465,25568333,25570079,25571769,25577961,25581812,25587527,25589388,25591574,25594014,25599334,25627130	25556006,25557080,25566570,25568512,25570224,25571910,25578134,25581906,25587653,25589576,25591693,25594067,25599434,25627195	1935	-	25553616-25555917	25627196-25646471
X:76230252|76237438	0	0	0	0	1.5665	1.5665	0	1.04434	1.04434	0.404744	0.820938	exon	ENSOCUT00000008814	ENSOCUG00000008812	POF1B	POF1B, actin binding protein	---	---	---	---	---	ENSOCUT00000008814	76230252	76237438	2	76230252,76237337	76230434,76237438	285	-	76214873-76230251	76237439-76247446
2:123477291|123482886	0	2.29975	1.5665	0	0	0	1.28875	0	-1.28875	0.324028	0.820938	exon	ENSOCUT00000013572	ENSOCUG00000013563	EHBP1	EH domain binding protein 1	---	---	---	---	---	ENSOCUT00000013572	123477291	123482886	4	123477291,123479990,123480251,123482762	123477414,123480096,123480389,123482886	495	-	123430959-123477290	123482887-123486457
17:6583763|6608776	0	2.29975	1.5665	0	0	0	1.28875	0	-1.28875	0.324028	0.820938	exon	ENSOCUT00000007964	ENSOCUG00000007953	DENND4A	DENN domain containing 4A	---	---	---	---	---	ENSOCUT00000007964	6583763	6608776	11	6583763,6584973,6585175,6586444,6586505,6586880,6589904,6592131,6593630,6594800,6608647	6583821,6585009,6585178,6586454,6586597,6587055,6590004,6592349,6593779,6594808,6608776	989	+	6582156-6583762	6608777-6612460
2:122423705|122425143	0	0	0	2.9272	1.5665	1.5665	0	2.02007	2.02007	0.169187	0.820938	exon	ENSOCUT00000002147	ENSOCUG00000002143	VPS54	VPS54, GARP complex subunit	---	---	---	---	---	ENSOCUT00000002147	122423705	122425143	3	122423705,122424411,122425031	122423834,122424592,122425143	425	+	122418333-122423704	122425144-122430572
9:91634886|91636715	0	1.5665	3.4342	0	0	1.5665	1.6669	0.522168	-1.14473	0.420985	0.820938	exon	ENSOCUT00000003931,ENSOCUT00000033796	ENSOCUG00000003929	SMAD4	SMAD family member 4	---	---	---	---	---	ENSOCUT00000003931	91634886	91636715	3	91634886,91635102,91636665	91635005,91635218,91636715	288	+	91630995-91634885	91636716-91645025
17:51908626|51911869	2.78358	3.14526	1.5665	0	1.5665	1.5665	2.49845	1.04434	-1.45411	0.439534	0.820938	exon	ENSOCUT00000032120	ENSOCUG00000010548	ARHGAP5	Rho GTPase activating protein 5	---	---	---	---	---	ENSOCUT00000032120	51908626	51911869	3	51908626,51909966,51911764	51908703,51910097,51911869	316	+	51878081-51908625	51911870-51916345
13:133690666|133713294	1.5665	1.5665	1.5665	0	0	0	1.5665	0	-1.5665	0.276971	0.820938	exon	ENSOCUT00000000268	ENSOCUG00000000264	UBR4	ubiquitin protein ligase E3 component n-recognin 4	---	---	---	---	---	ENSOCUT00000000268	133690666	133713294	16	133690666,133693832,133694661,133694903,133696493,133696686,133696959,133701904,133702556,133702709,133709114,133709346,133710915,133711857,133712938,133713209	133690763,133693935,133694790,133695042,133696595,133696827,133697083,133702028,133702615,133702899,133709213,133709483,133711032,133712044,133713097,133713294	2008	+	133680787-133690665	133713295-133725847
X:76230252|76230434	0	0	0	0	1.5665	2.29975	0	1.28875	1.28875	0.315196	0.820938	exon	ENSOCUT00000008814	ENSOCUG00000008812	POF1B	POF1B, actin binding protein	---	---	---	---	---	ENSOCUT00000008814	76230252	76230434	1	76230252	76230434	183	-	76214873-76230251	76230435-76237336
17:7607444|7607669	0	0	0	0	0	3.4342	0	1.14473	1.14473	0.287889	0.820938	exon	ENSOCUT00000002324	ENSOCUG00000002325	ZNF609	zinc finger protein 609	---	---	---	---	---	ENSOCUT00000002324	7607444	7607669	1	7607444	7607669	226	-	7553210-7607443	7607670-7732118
1:106284236|106287564	0	0	0	0	1.5665	1.5665	0	1.04434	1.04434	0.404744	0.820938	exon	ENSOCUT00000027826	ENSOCUG00000014267	RDX	radixin	---	---	---	---	---	ENSOCUT00000027826	106284236	106287564	2	106284236,106287322	106284328,106287564	336	+	106282237-106284235	106287565-106288738
2:48132227|48146590	1.5665	2.29975	1.5665	0	0	1.5665	1.81092	0.522168	-1.28875	0.49058	0.820938	exon	ENSOCUT00000011528	ENSOCUG00000011526	AADAT	aminoadipate aminotransferase	---	---	---	---	---	ENSOCUT00000011528	48132227	48146590	7	48132227,48132295,48132724,48134469,48139132,48141688,48146458	48132289,48132325,48132806,48134534,48139341,48141762,48146590	661	-	48129867-48132226	48146591-48148731
2:153760219|153761436	0	0	0	1.67902	0	1.5665	0	1.08184	1.08184	0.392701	0.820938	exon	ENSOCUT00000006623	ENSOCUG00000006600	BIRC6	baculoviral IAP repeat containing 6	---	---	---	---	---	ENSOCUT00000006623	153760219	153761436	2	153760219,153761359	153760407,153761436	267	-	153757925-153760218	153761437-153765289
2:116334664|116362138	0	0	0	1.67902	0	1.5665	0	1.08184	1.08184	0.392701	0.820938	exon	ENSOCUT00000015808	ENSOCUG00000015808	GMCL1	germ cell-less, spermatogenesis associated 1	---	---	---	---	---	ENSOCUT00000015808	116334664	116362138	11	116334664,116338250,116341251,116345914,116348694,116351437,116353824,116356332,116356999,116360129,116362042	116334751,116338395,116341326,116345983,116348834,116351527,116353908,116356397,116357111,116360226,116362138	1071	-	116330521-116334663	116362139-116365276
1:187032612|187035941	0	2.29975	1.5665	0	0	0	1.28875	0	-1.28875	0.324028	0.820938	exon	ENSOCUT00000017536	ENSOCUG00000017534	FNBP4	formin binding protein 4	---	---	---	---	---	ENSOCUT00000017536	187032612	187035941	2	187032612,187035817	187032716,187035941	230	-	187031176-187032611	187035942-187039734
13:55195237|55198660	1.5665	0	0	2.43409	3.14526	1.5665	0.522168	2.38195	1.85978	0.319389	0.820938	exon	ENSOCUT00000002993	ENSOCUG00000002993	WDR47	WD repeat domain 47	---	---	---	---	---	ENSOCUT00000002993	55195237	55198660	2	55195237,55198577	55195403,55198660	251	+	55150255-55195236	55198661-55208167
16:40959474|40997609	0	0	1.5665	1.67902	1.5665	2.29975	0.522168	1.84843	1.32626	0.477845	0.820938	exon	ENSOCUT00000014480	ENSOCUG00000014482	PLXDC2	plexin domain containing 2	---	---	---	---	---	ENSOCUT00000014480	40959474	40997609	5	40959474,40959966,40974862,40993297,40997487	40959555,40960061,40974961,40993415,40997609	520	-	40928430-40959473	40997610-41073096
1:1854229|1868783	4.06133	1.5665	2.29975	0	2.29975	0	2.64253	0.766583	-1.87595	0.391362	0.820938	exon	ENSOCUT00000030287,ENSOCUT00000004275	ENSOCUG00000004268	ECPAS	Ecm29 proteasome adaptor and scaffold	---	---	---	---	---	ENSOCUT00000004275	1854229	1868783	7	1854229,1856729,1864984,1865277,1867108,1868152,1868661	1854310,1856848,1865069,1865355,1867157,1868218,1868783	607	+	1850420-1854228	1868784-1872420
19:3132008|3144668	1.5665	0	2.78358	0	0	0	1.45003	0	-1.45003	0.271531	0.820938	exon	ENSOCUT00000013393	ENSOCUG00000013388	ULK2	unc-51 like autophagy activating kinase 2	---	---	---	---	---	ENSOCUT00000013393	3132008	3144668	6	3132008,3132478,3132990,3136735,3138867,3144531	3132111,3132665,3133276,3136815,3139012,3144668	944	-	3127501-3132007	3144669-3151096
17:7133204|7149831	0	0	0	1.67902	0	1.5665	0	1.08184	1.08184	0.392701	0.820938	exon	ENSOCUT00000007293	ENSOCUG00000007293	CLPX	caseinolytic mitochondrial matrix peptidase chaperone subunit	---	---	---	---	---	ENSOCUT00000007293	7133204	7149831	8	7133204,7137165,7140051,7142563,7143949,7145085,7146507,7149532	7133358,7137324,7140092,7142739,7144113,7145173,7146671,7149831	1253	+	7124216-7133203	7149832-7153040
12:46596088|46596250	0	1.5665	1.5665	0	0	0	1.04434	0	-1.04434	0.415139	0.820938	exon	ENSOCUT00000014127	ENSOCUG00000014074	DST	dystonin	---	---	---	---	---	ENSOCUT00000014127	46596088	46596250	1	46596088	46596250	163	-	46595100-46596087	46596251-46597668
13:56410148|56522822	0	0	0	0	0	3.14526	0	1.04842	1.04842	0.327414	0.820938	exon	ENSOCUT00000000172	ENSOCUG00000000172	VAV3	vav guanine nucleotide exchange factor 3	---	---	---	---	---	ENSOCUT00000000172	56410148	56522822	10	56410148,56410844,56424645,56429377,56480369,56504027,56510946,56514171,56514863,56522693	56410249,56410944,56424670,56429422,56480505,56504092,56510980,56514287,56514950,56522822	848	+	56375273-56410147	56522823-56546492
4:62182962|62360423	0	0	0	1.67902	0	1.5665	0	1.08184	1.08184	0.392701	0.820938	exon	ENSOCUT00000017847	ENSOCUG00000017847	TMTC2	transmembrane and tetratricopeptide repeat containing 2	---	---	---	---	---	ENSOCUT00000017847	62182962	62360423	9	62182962,62211513,62247753,62248307,62250541,62278511,62321611,62348791,62360360	62183790,62211627,62247838,62248491,62250619,62278632,62321692,62348905,62360423	1677	+	62142995-62182961	62360424-62420543
12:75834429|75841945	1.5665	2.29975	0	0	0	0	1.28875	0	-1.28875	0.324028	0.820938	exon	ENSOCUT00000017082	ENSOCUG00000017081	RNGTT	RNA guanylyltransferase and 5-phosphatase	---	---	---	---	---	ENSOCUT00000017082	75834429	75841945	3	75834429,75834605,75841836	75834517,75834708,75841945	303	-	75817824-75834428	75841946-75857904
17:23232590|23250425	0	0	0	0	2.78358	1.5665	0	1.45003	1.45003	0.261483	0.820938	exon	ENSOCUT00000006459	ENSOCUG00000006461	GALK2	galactokinase 2	---	---	---	---	---	ENSOCUT00000006459	23232590	23250425	4	23232590,23236606,23240774,23250337	23232736,23236696,23240897,23250425	451	-	23178319-23232589	23250426-23261777
14:67784204|67785411	2.29975	0	2.29975	0	0	0	1.53317	0	-1.53317	0.266927	0.820938	exon	ENSOCUT00000022004	ENSOCUG00000009484	ECT2	epithelial cell transforming 2	---	---	---	---	---	ENSOCUT00000022004	67784204	67785411	2	67784204,67785265	67784311,67785411	255	+	67773746-67784203	67785412-67787997
7:171781232|171856277	0	0	0	1.67902	1.5665	0	0	1.08184	1.08184	0.392701	0.820938	exon	ENSOCUT00000030148	ENSOCUG00000016726	TRIP12	thyroid hormone receptor interactor 12	---	---	---	---	---	ENSOCUT00000030148	171781232	171856277	21	171781232,171782745,171783183,171784828,171787508,171787777,171790791,171791063,171792935,171793275,171794828,171795005,171796555,171813220,171814541,171823240,171826040,171839292,171839439,171840899,171856131	171781439,171782863,171783411,171784981,171787664,171787894,171790956,171791131,171793096,171793367,171794923,171795040,171796703,171813315,171814624,171823376,171826145,171839351,171840094,171841024,171856277	3168	-	171778581-171781231	171856278-171894450
12:86517856|86544225	0	0	0	0	3.14526	0	0	1.04842	1.04842	0.327414	0.820938	exon_intron	ENSOCUT00000007888	ENSOCUG00000007892	FBXL4	F-box and leucine rich repeat protein 4	---	---	---	---	---	ENSOCUT00000007888	86517856	86544225	5	86517856,86528322,86535745,86542887,86543098	86518069,86528566,86536090,86543095,86544225	2142	-	86488415-86517855	---
8:27593127|27595612	0	0	0	0	1.5665	1.5665	0	1.04434	1.04434	0.404744	0.820938	exon	ENSOCUT00000003007	ENSOCUG00000003006	LRP6	LDL receptor related protein 6	---	---	---	---	---	ENSOCUT00000003007	27593127	27595612	2	27593127,27595401	27593329,27595612	415	+	27586510-27593126	27595613-27597057
7:14573554|14581993	0	1.5665	1.5665	0	0	0	1.04434	0	-1.04434	0.415139	0.820938	exon	ENSOCUT00000017139	ENSOCUG00000017137	ZC3HC1	zinc finger C3HC-type containing 1	---	---	---	---	---	ENSOCUT00000017139	14573554	14581993	3	14573554,14581235,14581910	14573666,14581393,14581993	356	+	14571935-14573553	14581994-14591292
18:18696015|18708527	0	2.29975	1.5665	0	0	0	1.28875	0	-1.28875	0.324028	0.820938	exon	ENSOCUT00000023575	ENSOCUG00000009919	SIRT1	sirtuin 1	---	---	---	---	---	ENSOCUT00000023575	18696015	18708527	3	18696015,18697249,18708375	18696094,18697396,18708527	381	-	18694174-18696014	18708528-18711259
19:3926886|3932284	0	0	0	1.67902	0	1.5665	0	1.08184	1.08184	0.392701	0.820938	exon	ENSOCUT00000010472	ENSOCUG00000010460	NCOR1	nuclear receptor corepressor 1	---	---	---	---	---	ENSOCUT00000010472	3926886	3932284	2	3926886,3932107	3927016,3932284	309	-	3920881-3926885	---
20:9048852|9054398	1.5665	1.5665	0	0	0	0	1.04434	0	-1.04434	0.415139	0.820938	exon	ENSOCUT00000015862	ENSOCUG00000015859	PRKCH	protein kinase C eta	---	---	---	---	---	ENSOCUT00000015862	9048852	9054398	3	9048852,9053987,9054225	9048979,9054130,9054398	446	+	9046831-9048851	9054399-9088222
16:47208052|47225263	0	1.5665	1.5665	0	0	0	1.04434	0	-1.04434	0.415139	0.820938	exon	ENSOCUT00000002265	ENSOCUG00000002266	---	---	---	---	---	---	---	ENSOCUT00000002265	47208052	47225263	9	47208052,47209812,47210612,47213319,47215178,47215864,47219561,47223080,47225174	47208299,47210043,47210665,47213464,47215246,47216050,47219637,47223239,47225263	1263	+	47199200-47208051	47225264-47234392
15:16134636|16136394	1.5665	0	0	2.43409	3.4342	3.14526	0.522168	3.00452	2.48235	0.218587	0.820938	exon	ENSOCUT00000003136	ENSOCUG00000003137	NR3C2	nuclear receptor subfamily 3 group C member 2	---	---	---	---	---	ENSOCUT00000003136	16134636	16136394	1	16134636	16136394	1759	+	16126991-16134635	16136395-16317149
14:82316464|82325075	1.5665	0	1.5665	0	0	0	1.04434	0	-1.04434	0.415139	0.820938	exon	ENSOCUT00000008681	ENSOCUG00000008674	MCF2L2	MCF.2 cell line derived transforming sequence-like 2	---	---	---	---	---	ENSOCUT00000008681	82316464	82325075	2	82316464,82324961	82316547,82325075	199	+	82268093-82316463	82325076-82359089
13:114865179|114891014	0	1.5665	1.5665	0	0	0	1.04434	0	-1.04434	0.415139	0.820938	exon	ENSOCUT00000027016	ENSOCUG00000004330	NRDC	nardilysin convertase	---	---	---	---	---	ENSOCUT00000027016	114865179	114891014	6	114865179,114874452,114883705,114885443,114888858,114890941	114865332,114874525,114883800,114885565,114888915,114891014	579	+	114864036-114865178	114891015-114893356
16:3711129|3726479	0	0	0	0	1.5665	1.5665	0	1.04434	1.04434	0.404744	0.820938	exon	ENSOCUT00000015957	ENSOCUG00000015950	ARHGAP12	Rho GTPase activating protein 12	---	---	---	---	---	ENSOCUT00000015957	3711129	3726479	5	3711129,3713963,3717140,3720303,3726378	3711254,3714037,3717201,3720384,3726479	447	+	3699407-3711128	3726480-3730386
17:76657055|76657324	0	0	0	0	2.78358	1.5665	0	1.45003	1.45003	0.261483	0.820938	exon	ENSOCUT00000001054	ENSOCUG00000001052	ARID4A	AT-rich interaction domain 4A	---	---	---	---	---	ENSOCUT00000001054	76657055	76657324	2	76657055,76657230	76657134,76657324	175	+	76644480-76657054	76657325-76662221
2:62029320|62047066	0	0	0	1.67902	1.5665	0	0	1.08184	1.08184	0.392701	0.820938	exon	ENSOCUT00000003906	ENSOCUG00000003903	CENPU	centromere protein U	---	---	---	---	---	ENSOCUT00000003906	62029320	62047066	7	62029320,62030802,62032383,62033633,62033894,62041360,62046997	62029488,62030958,62032444,62033680,62033969,62041468,62047066	691	-	---	62047067-62051977
2:157150179|157160696	0	0	0	1.67902	1.5665	0	0	1.08184	1.08184	0.392701	0.820938	exon	ENSOCUT00000003130	ENSOCUG00000003126	WDR43	WD repeat domain 43	---	---	---	---	---	ENSOCUT00000003130	157150179	157160696	6	157150179,157151117,157152824,157156353,157159640,157160610	157150242,157151148,157152910,157156481,157159771,157160696	531	-	157146683-157150178	157160697-157162247
3:123607938|123609153	0	1.5665	1.5665	0	0	0	1.04434	0	-1.04434	0.415139	0.820938	exon	ENSOCUT00000008047	ENSOCUG00000008050	EIF3E	eukaryotic translation initiation factor 3 subunit E	---	---	---	---	---	ENSOCUT00000008047	123607938	123609153	2	123607938,123609028	123608062,123609153	251	-	123599767-123607937	123609154-123614393
1:54293663|54300602	0	0	0	1.67902	1.5665	0	0	1.08184	1.08184	0.392701	0.820938	exon	ENSOCUT00000003219	ENSOCUG00000003208	DOCK8	dedicator of cytokinesis 8	---	---	---	---	---	ENSOCUT00000003219	54293663	54300602	5	54293663,54295257,54296752,54299459,54300522	54293825,54295350,54296888,54299618,54300602	635	-	54262744-54293662	54300603-54306022
14:35924893|35927159	2.29975	0	2.78358	0	0	0	1.69444	0	-1.69444	0.229082	0.820938	exon	ENSOCUT00000001886	ENSOCUG00000001874	ATR	ATR serine/threonine kinase	---	---	---	---	---	ENSOCUT00000001886	35924893	35927159	3	35924893,35926050,35927066	35925099,35926175,35927159	427	-	35921787-35924892	35927160-35929701
7:159793046|159798005	0	0	0	1.67902	0	2.29975	0	1.32626	1.32626	0.308178	0.820938	exon	ENSOCUT00000012517	ENSOCUG00000012513	USP37	ubiquitin specific peptidase 37	---	---	---	---	---	ENSOCUT00000012517	159793046	159798005	2	159793046,159797815	159793163,159798005	309	-	159792601-159793045	159798006-159798796
11:68911382|68912397	1.5665	1.5665	0	0	0	0	1.04434	0	-1.04434	0.415139	0.820938	exon	ENSOCUT00000011375	ENSOCUG00000011357	ITGA1	integrin subunit alpha 1	---	---	---	---	---	ENSOCUT00000011375	68911382	68912397	3	68911382,68911585,68912270	68911470,68911696,68912397	329	+	68899331-68911381	68912398-68929786
3:54120507|54126894	1.5665	0	0	3.29403	1.5665	0	0.522168	1.62018	1.09801	0.442496	0.820938	exon	ENSOCUT00000000038	ENSOCUG00000000038	CREBRF	CREB3 regulatory factor	---	---	---	---	---	ENSOCUT00000000038	54120507	54126894	3	54120507,54122644,54125808	54120714,54122769,54126894	1421	+	54091256-54120506	54126895-54142563
14:105460341|105464847	0	0	0	0	2.29975	1.5665	0	1.28875	1.28875	0.315196	0.820938	exon	ENSOCUT00000006474	ENSOCUG00000006473	ATP6V1A	ATPase H+ transporting V1 subunit A	---	---	---	---	---	ENSOCUT00000006474	105460341	105464847	3	105460341,105461826,105464633	105460492,105461963,105464847	505	-	105453174-105460340	105464848-105466614
2:147030324|147042715	2.29975	1.5665	0	0	0	0	1.28875	0	-1.28875	0.324028	0.820938	exon	ENSOCUT00000016694	ENSOCUG00000016679	MAP4K3	mitogen-activated protein kinase kinase kinase kinase 3	---	---	---	---	---	ENSOCUT00000016694	147030324	147042715	5	147030324,147030637,147030784,147030959,147042637	147030455,147030699,147030865,147031069,147042715	467	+	147028480-147030323	147042716-147052960
3:101829465|101860804	0	1.5665	1.5665	0	0	0	1.04434	0	-1.04434	0.415139	0.820938	exon	ENSOCUT00000001083	ENSOCUG00000001081	WWP1	WW domain containing E3 ubiquitin protein ligase 1	---	---	---	---	---	ENSOCUT00000001083	101829465	101860804	5	101829465,101836032,101857181,101857406,101860620	101829603,101836156,101857318,101857472,101860804	654	+	101825671-101829464	101860805-101866586
13:13554806|13588172	2.29975	0	1.5665	0	0	0	1.28875	0	-1.28875	0.324028	0.820938	exon	ENSOCUT00000011348	ENSOCUG00000011322	KMT2C	lysine methyltransferase 2C	---	---	---	---	---	ENSOCUT00000011348	13554806	13588172	12	13554806,13559848,13560731,13571760,13572771,13573323,13574378,13574753,13582618,13582888,13585413,13588053	13554936,13559967,13560859,13571972,13572836,13573432,13574542,13574934,13582722,13582989,13585529,13588172	1560	-	13550368-13554805	13588173-13598067
7:3155327|3156101	1.5665	1.5665	0	0	0	0	1.04434	0	-1.04434	0.415139	0.820938	exon	ENSOCUT00000001679	ENSOCUG00000001676	EZH2	enhancer of zeste 2 polycomb repressive complex 2 subunit	---	---	---	---	---	ENSOCUT00000001679	3155327	3156101	2	3155327,3156000	3155450,3156101	226	+	3127904-3155326	3156129-3170122
11:18362603|18371816	0	0	0	2.43409	1.5665	0	0	1.33353	1.33353	0.301396	0.820938	exon	ENSOCUT00000004441	ENSOCUG00000004434	CHD1	chromodomain helicase DNA binding protein 1	---	---	---	---	---	ENSOCUT00000004441	18362603	18371816	5	18362603,18365316,18366147,18370859,18371600	18362765,18365504,18366337,18370948,18371816	850	-	18360741-18362602	18371817-18372868
12:46597669|46600075	0	1.5665	0	0	3.14526	1.5665	0.522168	1.57059	1.04842	0.465489	0.820938	exon	ENSOCUT00000014127	ENSOCUG00000014074	DST	dystonin	---	---	---	---	---	ENSOCUT00000014127	46597669	46600075	4	46597669,46598669,46599317,46599918	46597862,46598807,46599495,46600075	670	-	46596251-46597668	46600076-46601380
10:33896986|33957438	0	0	0	0	1.5665	1.5665	0	1.04434	1.04434	0.404744	0.820938	exon	ENSOCUT00000005129	ENSOCUG00000005128	PPP1R9A	protein phosphatase 1 regulatory subunit 9A	---	---	---	---	---	ENSOCUT00000005129	33896986	33957438	9	33896986,33897260,33898833,33901953,33913890,33930610,33935539,33947409,33957318	33897157,33897356,33899062,33902006,33914045,33930675,33935674,33947513,33957438	1137	-	33872551-33896985	33957439-33964146
9:23506157|23506605	1.5665	1.5665	0	0	0	0	1.04434	0	-1.04434	0.415139	0.820938	exon	ENSOCUT00000013253	ENSOCUG00000013244	CCDC66	coiled-coil domain containing 66	---	---	---	---	---	ENSOCUT00000013253	23506157	23506605	2	23506157,23506502	23506322,23506605	270	+	23505933-23506156	23506606-23509917
3:155590484|155634969	3.14526	0	0	0	0	0	1.04842	0	-1.04842	0.334534	0.820938	exon	ENSOCUT00000008628	ENSOCUG00000008622	TRAPPC9	trafficking protein particle complex 9	---	---	---	---	---	ENSOCUT00000008628	155590484	155634969	4	155590484,155600571,155620893,155634848	155590627,155600787,155621018,155634969	609	-	155547419-155590483	155634970-155643822
8:18202218|18225275	1.5665	0	1.5665	0	0	0	1.04434	0	-1.04434	0.415139	0.820938	exon	ENSOCUT00000008033	ENSOCUG00000008023	ABCC9	ATP-binding cassette sub-family C member 9	---	---	---	---	---	ENSOCUT00000008033	18202218	18225275	5	18202218,18209789,18215656,18221372,18225170	18202360,18209897,18215763,18221444,18225275	539	+	18201335-18202217	18225276-18235591
1:40816623|40819434	0	1.5665	1.5665	0	0	0	1.04434	0	-1.04434	0.415139	0.820938	exon	ENSOCUT00000004410	ENSOCUG00000004401	MPDZ	multiple PDZ domain crumbs cell polarity complex component	---	---	---	---	---	ENSOCUT00000004410	40816623	40819434	4	40816623,40817559,40818321,40819306	40816832,40817698,40818534,40819434	693	+	40790827-40816622	40819435-40821351
13:52501249|52515543	0	0	0	0	2.29975	2.29975	0	1.53317	1.53317	0.259149	0.820938	exon	ENSOCUT00000033394	ENSOCUG00000029303	RAP1A	RAP1A, member of RAS oncogene family	---	---	---	---	---	ENSOCUT00000033394	52501249	52515543	5	52501249,52504566,52507165,52511274,52515460	52501392,52504706,52507221,52511342,52515543	495	-	52496596-52501248	52515544-52585605
1:183054024|183054464	0	0	0	0	1.5665	1.5665	0	1.04434	1.04434	0.404744	0.820938	exon	ENSOCUT00000021204	ENSOCUG00000014674	TTC17	tetratricopeptide repeat domain 17	---	---	---	---	---	ENSOCUT00000021204	183054024	183054464	2	183054024,183054240	183054101,183054464	303	+	183052473-183054023	183054465-183061788
12:148428040|148556119	0	1.5665	2.29975	0	0	0	1.28875	0	-1.28875	0.324028	0.820938	exon_intron	ENSOCUT00000001445	ENSOCUG00000001444	TULP4	tubby like protein 4	---	---	---	---	---	ENSOCUT00000001445	148428040	148556119	3	148428040,148545710,148555958	148430230,148545838,148556119	2482	+	---	148556120-148570560
11:55393848|55416044	0	0	0	0	2.29975	1.5665	0	1.28875	1.28875	0.315196	0.820938	exon	ENSOCUT00000006358	ENSOCUG00000006357	ADAMTS12	ADAM metallopeptidase with thrombospondin type 1 motif 12	---	---	---	---	---	ENSOCUT00000006358	55393848	55416044	4	55393848,55398673,55415101,55415848	55393997,55398797,55415184,55416044	556	-	55388621-55393847	55416045-55483750
4:41472412|41477090	0	0	3.14526	0	0	0	1.04842	0	-1.04842	0.334534	0.820938	exon	ENSOCUT00000023821	ENSOCUG00000002406	MON2	MON2 homolog, regulator of endosome-to-Golgi trafficking	---	---	---	---	---	ENSOCUT00000023821	41472412	41477090	3	41472412,41473201,41476896	41472509,41473326,41477090	419	+	41469686-41472411	41477091-41485665
18:12516331|12550114	0	0	0	1.67902	2.29975	0	0	1.32626	1.32626	0.308178	0.820938	exon	ENSOCUT00000017350	ENSOCUG00000017344	KAT6B	lysine acetyltransferase 6B	---	---	---	---	---	ENSOCUT00000017350	12516331	12550114	10	12516331,12519744,12523192,12526394,12528199,12529850,12533014,12535874,12536322,12550006	12516424,12519905,12523333,12526509,12528320,12530232,12533146,12535955,12536437,12550114	1459	-	12484515-12516330	12550115-12656984
11:81426084|81469546	1.5665	1.5665	1.5665	0	0	0	1.5665	0	-1.5665	0.276971	0.820938	exon	ENSOCUT00000001528	ENSOCUG00000001525	ADAMTS6	ADAM metallopeptidase with thrombospondin type 1 motif 6	---	---	---	---	---	ENSOCUT00000001528	81426084	81469546	5	81426084,81441306,81443421,81456048,81469405	81426186,81441369,81443566,81456155,81469546	563	-	81402700-81426083	81469547-81479446
13:37264562|37305285	0	0	0	0	1.5665	1.5665	0	1.04434	1.04434	0.404744	0.820938	exon	ENSOCUT00000014991	ENSOCUG00000014986	ASH1L	ASH1 like histone lysine methyltransferase	---	---	---	---	---	ENSOCUT00000014991	37264562	37305285	4	37264562,37277999,37291988,37305191	37264663,37278740,37292167,37305285	1119	+	37250343-37264561	37305286-37333143
11:30825854|30839011	0	1.5665	1.5665	0	0	0	1.04434	0	-1.04434	0.415139	0.820938	exon	ENSOCUT00000003132	ENSOCUG00000003129	WDR36	WD repeat domain 36	---	---	---	---	---	ENSOCUT00000003132	30825854	30839011	7	30825854,30826749,30827124,30830244,30837155,30838078,30838866	30825968,30826914,30827232,30830323,30837262,30838175,30839011	822	+	30820341-30825853	30839012-30841747
2:117617554|117675852	0	0	0	2.43409	0	2.29975	0	1.57795	1.57795	0.250052	0.820938	exon	ENSOCUT00000033885	ENSOCUG00000006121	APLF	aprataxin and PNKP like factor	---	---	---	---	---	ENSOCUT00000033885	117617554	117675852	5	117617554,117642032,117643156,117648216,117675781	117617738,117642164,117643303,117648388,117675852	711	-	117609074-117617553	117675853-117691609
7:159797815|159819484	1.5665	2.29975	2.29975	1.67902	0	0	2.05533	0.559675	-1.49566	0.44671	0.820938	exon	ENSOCUT00000012517	ENSOCUG00000012513	USP37	ubiquitin specific peptidase 37	---	---	---	---	---	ENSOCUT00000012517	159797815	159819484	6	159797815,159798797,159799344,159800289,159817596,159819387	159798005,159798920,159799475,159800450,159817680,159819484	792	-	159793164-159797814	159819485-159833411
11:28488639|28509327	1.5665	2.29975	0	0	0	0	1.28875	0	-1.28875	0.324028	0.820938	exon	ENSOCUT00000010922	ENSOCUG00000010918	FER	FER tyrosine kinase	---	---	---	---	---	ENSOCUT00000010922	28488639	28509327	3	28488639,28500130,28509205	28488731,28500333,28509327	420	+	28436639-28488638	28509328-28590062
21:6925231|6934268	1.5665	1.5665	1.5665	0	0	0	1.5665	0	-1.5665	0.276971	0.820938	exon	ENSOCUT00000033995,ENSOCUT00000011937	ENSOCUG00000011938	TCTN1	tectonic family member 1	---	---	---	---	---	ENSOCUT00000011937	6925231	6934268	3	6925231,6932951,6934117	6925351,6933081,6934268	404	+	6920973-6925230	6934269-6938678
1:54345347|54358780	0	0	0	1.67902	2.78358	0	0	1.48753	1.48753	0.257503	0.820938	exon	ENSOCUT00000003219	ENSOCUG00000003208	DOCK8	dedicator of cytokinesis 8	---	---	---	---	---	ENSOCUT00000003219	54345347	54358780	3	54345347,54348241,54358678	54345418,54348416,54358780	351	-	54327976-54345346	54358781-54418885
10:36480501|36514617	0	0	0	0	2.29975	2.29975	0	1.53317	1.53317	0.259149	0.820938	exon	ENSOCUT00000004581	ENSOCUG00000004576	ANKIB1	ankyrin repeat and IBR domain containing 1	---	---	---	---	---	ENSOCUT00000004581	36480501	36514617	4	36480501,36492447,36506382,36514521	36480683,36492747,36506658,36514617	858	-	36470793-36480500	---
1:193565055|193566001	0	0	0	0	1.5665	2.78358	0	1.45003	1.45003	0.261483	0.820938	exon	ENSOCUT00000015721	ENSOCUG00000015723	SLC15A3	solute carrier family 15 member 3	---	---	---	---	---	ENSOCUT00000015721	193565055	193566001	2	193565055,193565891	193565223,193566001	280	-	193563116-193565054	193566002-193568162
1:12848938|12850272	1.5665	1.5665	2.29975	0	0	0	1.81092	0	-1.81092	0.22087	0.820938	exon	ENSOCUT00000004244	ENSOCUG00000004242	TEX10	testis expressed 10	---	---	---	---	---	ENSOCUT00000004244	12848938	12850272	2	12848938,12850029	12849650,12850272	957	+	12846409-12848937	12850273-12857425
9:24122611|24126744	1.5665	0	3.4342	0	0	1.5665	1.6669	0.522168	-1.14473	0.420985	0.820938	exon	ENSOCUT00000006827	ENSOCUG00000006823	APPL1	adaptor protein, phosphotyrosine interacting with PH domain and leucine zipper 1	---	---	---	---	---	ENSOCUT00000006827	24122611	24126744	3	24122611,24126062,24126562	24122667,24126153,24126744	332	+	24120877-24122610	24126745-24129660
19:53093311|53102321	3.14526	1.5665	0	0	0	0	1.57059	0	-1.57059	0.25414	0.820938	exon	ENSOCUT00000014355	ENSOCUG00000014338	ABCA5	ATP binding cassette subfamily A member 5	---	---	---	---	---	ENSOCUT00000014355	53093311	53102321	7	53093311,53096841,53097168,53098792,53100173,53100856,53102211	53093430,53096980,53097258,53098930,53100292,53101031,53102321	897	-	53086264-53093310	53102322-53106579
1:107869988|107878505	1.5665	0	0	2.43409	2.78358	2.78358	0.522168	2.66708	2.14491	0.283698	0.820938	exon	ENSOCUT00000003846	ENSOCUG00000003843	DDX10	DEAD-box helicase 10	---	---	---	---	---	ENSOCUT00000003846	107869988	107878505	3	107869988,107875016,107878418	107870453,107875104,107878505	643	-	107763500-107869987	107878506-107886400
3:150150870|150156354	1.5665	0	2.78358	0	0	0	1.45003	0	-1.45003	0.271531	0.820938	exon	ENSOCUT00000017015	ENSOCUG00000017015	ZFAT	zinc finger and AT-hook domain containing	---	---	---	---	---	ENSOCUT00000017015	150150870	150156354	3	150150870,150153158,150156236	150150994,150153284,150156354	371	-	150129664-150150869	150156355-150173798
19:53063706|53064577	0	0	0	0	2.29975	1.5665	0	1.28875	1.28875	0.315196	0.820938	exon	ENSOCUT00000014355	ENSOCUG00000014338	ABCA5	ATP binding cassette subfamily A member 5	---	---	---	---	---	ENSOCUT00000014355	53063706	53064577	3	53063706,53063926,53064402	53063800,53064001,53064577	347	-	53054584-53063705	53064578-53065682
2:149463572|149467128	1.5665	0	1.5665	0	0	0	1.04434	0	-1.04434	0.415139	0.820938	exon	ENSOCUT00000007259	ENSOCUG00000007258	STRN	striatin	---	---	---	---	---	ENSOCUT00000007259	149463572	149467128	4	149463572,149463645,149466233,149467007	149463640,149463748,149466280,149467128	343	+	149459132-149463571	149467129-149472992
19:26562488|26602604	1.5665	0	1.5665	0	0	0	1.04434	0	-1.04434	0.415139	0.820938	exon	ENSOCUT00000009408	ENSOCUG00000009402	USP32	ubiquitin specific peptidase 32	---	---	---	---	---	ENSOCUT00000009408	26562488	26602604	10	26562488,26563767,26565259,26571819,26582957,26587342,26597455,26598062,26600019,26602473	26562628,26563942,26565448,26571921,26583018,26587425,26597517,26598177,26600126,26602604	1175	-	26552714-26562487	26602605-26626645
19:50278361|50331699	0	1.5665	2.29975	0	0	0	1.28875	0	-1.28875	0.324028	0.820938	exon	ENSOCUT00000008866	ENSOCUG00000008856	HELZ	helicase with zinc finger	---	---	---	---	---	ENSOCUT00000008866	50278361	50331699	14	50278361,50279753,50282767,50283418,50284517,50293113,50305186,50306289,50312882,50313589,50325315,50328899,50330184,50331552	50278412,50279828,50282965,50283525,50284814,50293380,50305519,50306419,50313061,50313690,50325493,50329017,50330329,50331699	2340	+	50272479-50278360	50331700-50339599
9:72265513|72284360	1.5665	0	1.5665	0	0	0	1.04434	0	-1.04434	0.415139	0.820938	exon	ENSOCUT00000012505	ENSOCUG00000029143	DSC3	desmocollin 3	---	---	---	---	---	ENSOCUT00000012505	72265513	72284360	9	72265513,72267913,72270210,72271622,72271875,72279306,72279892,72282468,72284216	72265634,72268137,72270434,72271764,72272134,72279491,72280026,72282634,72284360	1608	-	72260293-72265512	72284361-72286207
10:31043971|31054100	1.5665	1.5665	1.5665	0	0	0	1.5665	0	-1.5665	0.276971	0.820938	exon	ENSOCUT00000000466	ENSOCUG00000000466	MIOS	meiosis regulator for oocyte development	---	---	---	---	---	ENSOCUT00000000466	31043971	31054100	3	31043971,31052347,31052770	31044225,31052445,31054100	1685	-	31041766-31043970	31054101-31060379
1:26666741|26698588	1.5665	0	1.5665	0	0	0	1.04434	0	-1.04434	0.415139	0.820938	exon	ENSOCUT00000015461	ENSOCUG00000015461	CAAP1	caspase activity and apoptosis inhibitor 1	---	---	---	---	---	ENSOCUT00000015461	26666741	26698588	4	26666741,26668237,26669747,26698515	26666941,26668321,26669822,26698588	436	+	26661360-26666740	26698589-26727742
19:51279844|51292561	0	0	0	0	1.5665	2.78358	0	1.45003	1.45003	0.261483	0.820938	exon	ENSOCUT00000008459	ENSOCUG00000008454	CEP112	centrosomal protein 112	---	---	---	---	---	ENSOCUT00000008459	51279844	51292561	4	51279844,51280307,51281037,51292452	51279998,51280436,51281159,51292561	518	+	51257534-51279843	51292562-51329004
19:25476513|25480821	0	0	0	1.67902	0	1.5665	0	1.08184	1.08184	0.392701	0.820938	exon	ENSOCUT00000014508	ENSOCUG00000014504	TADA2A	transcriptional adaptor 2A	---	---	---	---	---	ENSOCUT00000014508	25476513	25480821	4	25476513,25477052,25478809,25480711	25476556,25477184,25478880,25480821	360	-	25473859-25476512	25480822-25484162
1:133547901|133582085	0	1.5665	2.78358	0	0	0	1.45003	0	-1.45003	0.271531	0.820938	exon	ENSOCUT00000004476,ENSOCUT00000033160	ENSOCUG00000004475	ANKRD42	ankyrin repeat domain 42	---	---	---	---	---	ENSOCUT00000004476	133547901	133582085	7	133547901,133550812,133559604,133564313,133572801,133578034,133581950	133548045,133550938,133559779,133564418,133572926,133578234,133582085	1017	-	133534684-133547900	133582086-133584623
7:151018965|151051098	2.29975	0	1.5665	0	0	0	1.28875	0	-1.28875	0.324028	0.820938	exon	ENSOCUT00000006626	ENSOCUG00000006625	ACADL	acyl-CoA dehydrogenase long chain	---	---	---	---	---	ENSOCUT00000006626	151018965	151051098	11	151018965,151021445,151037946,151038310,151038550,151038729,151039135,151040713,151040763,151045951,151050934	151019051,151021572,151038059,151038324,151038616,151038739,151039147,151040720,151040927,151046023,151051098	846	-	151014060-151018964	151051099-151053008
4:74343239|74355672	0	0	0	2.43409	1.5665	1.5665	0	1.8557	1.8557	0.204737	0.820938	exon	ENSOCUT00000030390	ENSOCUG00000004657	NR2C1	nuclear receptor subfamily 2 group C member 1	---	---	---	---	---	ENSOCUT00000030390	74343239	74355672	5	74343239,74350235,74351849,74355348,74355525	74343360,74350400,74352033,74355438,74355672	712	-	74336551-74343238	74355673-74357054
14:120520176|120529703	0	0	0	1.67902	0	1.5665	0	1.08184	1.08184	0.392701	0.820938	exon	ENSOCUT00000024264	ENSOCUG00000025366	CMSS1	cms1 ribosomal small subunit homolog (yeast)	---	---	---	---	---	ENSOCUT00000024264	120520176	120529703	4	120520176,120521762,120527792,120529632	120520278,120521821,120527921,120529703	365	-	120512644-120520175	120529704-120542899
7:131334074|131370223	0	1.5665	1.5665	0	0	0	1.04434	0	-1.04434	0.415139	0.820938	exon	ENSOCUT00000002448	ENSOCUG00000002448	GLS	glutaminase	---	---	---	---	---	ENSOCUT00000002448	131334074	131370223	11	131334074,131335867,131340145,131346913,131354491,131354612,131359330,131359986,131366964,131368332,131370131	131334203,131335946,131340308,131346971,131354523,131354670,131359396,131360036,131367140,131368463,131370223	1045	+	131328070-131334073	131370224-131396554
13:110458390|110474406	2.78358	1.5665	2.78358	0	1.5665	1.5665	2.37789	1.04434	-1.33355	0.48476	0.820938	exon	ENSOCUT00000010023	ENSOCUG00000010024	---	---	---	---	---	---	---	ENSOCUT00000010023	110458390	110474406	3	110458390,110473658,110474349	110458547,110473938,110474406	497	+	110416133-110458389	110474407-110482973
13:103073650|103084877	0	0	0	0	1.5665	1.5665	0	1.04434	1.04434	0.404744	0.820938	exon	ENSOCUT00000000282	ENSOCUG00000000281	ALG6	ALG6, alpha-1,3-glucosyltransferase	---	---	---	---	---	ENSOCUT00000000282	103073650	103084877	6	103073650,103074686,103080501,103081559,103082250,103084788	103073785,103074871,103080565,103081641,103082338,103084877	649	-	103071589-103073649	103084878-103092519
12:43810976|43812265	2.78358	3.14526	4.06133	0	1.5665	2.78358	3.33006	1.45003	-1.88003	0.453609	0.820938	exon	ENSOCUT00000002731	ENSOCUG00000002730	LRRC1	leucine rich repeat containing 1	---	---	---	---	---	ENSOCUT00000002731	43810976	43812265	2	43810976,43812129	43811148,43812265	310	+	43802867-43810975	43812266-43813808
13:75904030|75904481	0	0	0	1.67902	1.5665	0	0	1.08184	1.08184	0.392701	0.820938	exon	ENSOCUT00000017067	ENSOCUG00000017056	PKN2	protein kinase N2	---	---	---	---	---	ENSOCUT00000017067	75904030	75904481	2	75904030,75904336	75904243,75904481	360	-	75889423-75904029	75904482-75906071
19:52941593|52942469	0	0	0	0	4.36587	3.14526	0	2.50371	2.50371	0.135778	0.820938	exon	ENSOCUT00000014391	ENSOCUG00000014380	ABCA6	ATP binding cassette subfamily A member 6	---	---	---	---	---	ENSOCUT00000014391	52941593	52942469	3	52941593,52941763,52942291	52941687,52941838,52942469	350	-	52939339-52941592	52942470-52943178
13:130155550|130164474	2.78358	0	1.5665	0	0	0	1.45003	0	-1.45003	0.271531	0.820938	exon	ENSOCUT00000001166	ENSOCUG00000001164	KDM1A	lysine demethylase 1A	---	---	---	---	---	ENSOCUT00000001166	130155550	130164474	5	130155550,130158850,130160897,130161603,130164341	130155631,130158956,130160989,130161681,130164474	495	-	130153307-130155549	130164475-130172999
7:141884021|141896998	1.5665	1.5665	0	0	0	0	1.04434	0	-1.04434	0.415139	0.820938	exon	ENSOCUT00000011071	ENSOCUG00000011072	CFLAR	CASP8 and FADD like apoptosis regulator	---	---	---	---	---	ENSOCUT00000011071	141884021	141896998	8	141884021,141886391,141888871,141889835,141893012,141894653,141896149,141896917	141884430,141886496,141889006,141889920,141893066,141894664,141896195,141896998	934	+	---	141896999-141905558
3:77207881|77225463	0	0	0	0	1.5665	1.5665	0	1.04434	1.04434	0.404744	0.820938	exon	ENSOCUT00000033893	ENSOCUG00000029233	ASPH	aspartate beta-hydroxylase	---	---	---	---	---	ENSOCUT00000033893	77207881	77225463	5	77207881,77213700,77215888,77221191,77225313	77208018,77213789,77215986,77221327,77225463	615	-	77183691-77207880	77225464-77231953
12:82818235|82819364	0	0	0	0	2.29975	2.29975	0	1.53317	1.53317	0.259149	0.820938	exon_intron	ENSOCUT00000033731	ENSOCUG00000029427	---	---	---	---	---	---	---	ENSOCUT00000033731	82818235	82819364	1	82818235	82819364	1130	+	---	82819365-82834399
1:76160307|76177361	1.5665	1.5665	0	0	0	0	1.04434	0	-1.04434	0.415139	0.820938	exon	ENSOCUT00000008081	ENSOCUG00000008078	---	---	---	---	---	---	---	ENSOCUT00000008081	76160307	76177361	5	76160307,76161274,76169255,76172944,76177272	76160400,76161346,76169387,76173073,76177361	520	+	76149115-76160306	76177362-76180444
3:82942582|82960837	0	1.5665	1.5665	2.9272	3.14526	1.5665	1.04434	2.54632	1.50199	0.423446	0.820938	exon	ENSOCUT00000015850	ENSOCUG00000015847	CSPP1	centrosome and spindle pole associated protein 1	---	---	---	---	---	ENSOCUT00000015850	82942582	82960837	7	82942582,82948761,82955292,82957382,82959977,82960115,82960774	82942652,82948854,82955352,82957590,82960098,82960144,82960837	651	+	82938674-82942581	82960838-82971142
16:2612618|2626145	0	0	0	0	1.5665	1.5665	0	1.04434	1.04434	0.404744	0.820938	exon	ENSOCUT00000010076	ENSOCUG00000010076	ABI1	abl interactor 1	---	---	---	---	---	ENSOCUT00000010076	2612618	2626145	4	2612618,2616681,2620139,2626045	2612803,2616767,2620315,2626145	551	-	2609805-2612617	2626146-2631316
10:35513801|35550036	0	1.5665	1.5665	0	0	0	1.04434	0	-1.04434	0.415139	0.820938	exon	ENSOCUT00000000629	ENSOCUG00000000625	VPS50	VPS50, EARP/GARPII complex subunit	---	---	---	---	---	ENSOCUT00000000629	35513801	35550036	10	35513801,35526420,35533359,35535673,35538464,35541283,35544260,35544686,35546952,35549904	35513881,35526541,35533465,35535791,35538640,35541373,35544358,35544780,35547043,35550036	1116	-	35505779-35513800	35550037-35562390
11:16734989|16737518	0	0	0	0	1.5665	1.5665	0	1.04434	1.04434	0.404744	0.820938	exon	ENSOCUT00000001651	ENSOCUG00000001651	LNPEP	leucyl and cystinyl aminopeptidase	---	---	---	---	---	ENSOCUT00000001651	16734989	16737518	2	16734989,16737362	16735172,16737518	341	+	16725741-16734988	16737519-16746792
13:142052420|142052484	0	0	0	0	1.5665	1.5665	0	1.04434	1.04434	0.404744	0.820938	intergenic region	n/a	n/a	---	---	---	---	---	---	---	13:142052420|142052484	142052420	142052484	1	142052420	142052484	65	+	---	---
5:24645713|24675507	0	0	0	1.67902	0	1.5665	0	1.08184	1.08184	0.392701	0.820938	exon	ENSOCUT00000026418	ENSOCUG00000014211	SNTB2	syntrophin beta 2	---	---	---	---	---	ENSOCUT00000026418	24645713	24675507	3	24645713,24664559,24675365	24645926,24664769,24675507	568	+	24642665-24645710	24675508-24695088
X:5699782|5707734	0	0	0	1.67902	0	1.5665	0	1.08184	1.08184	0.392701	0.820938	exon	ENSOCUT00000015296	ENSOCUG00000015294	BCLAF3	BCLAF1 and THRAP3 family member 3	---	---	---	---	---	ENSOCUT00000015296	5699782	5707734	3	5699782,5700408,5707668	5700075,5700980,5707734	934	-	5699470-5699781	5707735-5724454
2:160104180|160105216	0	0	0	1.67902	2.29975	0	0	1.32626	1.32626	0.308178	0.820938	exon	ENSOCUT00000017114	ENSOCUG00000017108	ASXL2	additional sex combs like 2, transcriptional regulator	---	---	---	---	---	ENSOCUT00000017114	160104180	160105216	2	160104180,160105073	160104306,160105216	271	+	160097328-160104179	160105217-160109621
17:64605651|64606838	1.5665	1.5665	0	0	0	0	1.04434	0	-1.04434	0.415139	0.820938	exon	ENSOCUT00000007557	ENSOCUG00000007550	MIS18BP1	MIS18 binding protein 1	---	---	---	---	---	ENSOCUT00000007557	64605651	64606838	2	64605651,64606758	64606135,64606838	566	-	64600104-64605650	64606839-64613086
2:147291826|147321319	0	1.5665	1.5665	0	0	0	1.04434	0	-1.04434	0.415139	0.820938	exon	ENSOCUT00000021553	ENSOCUG00000007844	SOS1	SOS Ras/Rac guanine nucleotide exchange factor 1	---	---	---	---	---	ENSOCUT00000021553	147291826	147321319	7	147291826,147298274,147300791,147304655,147307808,147321030,147321221	147291951,147298405,147300955,147304864,147307951,147321140,147321319	987	+	147291724-147291825	147321320-147335896
7:123053067|123053600	0	0	0	1.67902	1.5665	0	0	1.08184	1.08184	0.392701	0.820938	exon	ENSOCUT00000013145	ENSOCUG00000013133	NCKAP1	NCK associated protein 1	---	---	---	---	---	ENSOCUT00000013145	123053067	123053600	2	123053067,123053382	123053197,123053600	350	-	123052798-123053066	123053601-123056603
2:116695571|116696847	0	0	0	1.67902	2.29975	0	0	1.32626	1.32626	0.308178	0.820938	intron	ENSOCUT00000009553	ENSOCUG00000009550	AAK1	AP2 associated kinase 1	---	---	---	---	---	ENSOCUT00000009553	116695571	116696847	1	116695571	116696847	1277	+	116695571-116695570	116696848-116696865
2:153809192|153809492	0	0	0	0	2.29975	3.67482	0	1.99152	1.99152	0.182499	0.820938	exon	ENSOCUT00000006623	ENSOCUG00000006600	BIRC6	baculoviral IAP repeat containing 6	---	---	---	---	---	ENSOCUT00000006623	153809192	153809492	1	153809192	153809492	301	-	153805972-153809191	153809493-153821920
8:97038413|97117453	0	0	0	0	3.14526	0	0	1.04842	1.04842	0.327414	0.820938	exon	ENSOCUT00000014626	ENSOCUG00000014610	ABCC4	ATP binding cassette subfamily C member 4	---	---	---	---	---	ENSOCUT00000014626	97038413	97117453	12	97038413,97087315,97089530,97090019,97090395,97092133,97095074,97101704,97102004,97110239,97111265,97117352	97038492,97087461,97089624,97090056,97090535,97092342,97095170,97101790,97102098,97110430,97111354,97117453	1374	-	97005607-97038412	97117454-97127663
16:69732078|69739296	0	2.29975	1.5665	0	0	0	1.28875	0	-1.28875	0.324028	0.820938	exon	ENSOCUT00000007484	ENSOCUG00000007477	IPO9	importin 9	---	---	---	---	---	ENSOCUT00000007484	69732078	69739296	9	69732078,69733495,69734468,69735267,69736647,69736875,69737065,69737694,69739208	69732217,69733601,69734566,69735418,69736705,69736975,69737184,69737780,69739296	954	-	69728005-69732077	69739297-69744941
8:74353292|74401308	2.29975	0	2.29975	0	0	0	1.53317	0	-1.53317	0.266927	0.820938	exon	ENSOCUT00000006671	ENSOCUG00000006671	PIBF1	progesterone immunomodulatory binding factor 1	---	---	---	---	---	ENSOCUT00000006671	74353292	74401308	4	74353292,74367389,74391605,74401224	74353382,74367491,74391735,74401308	410	+	74341820-74353291	74401309-74432515
1:190838977|190840412	2.29975	0	0	3.29403	2.78358	1.5665	0.766583	2.54804	1.78145	0.462646	0.820938	exon	ENSOCUT00000021734	ENSOCUG00000014213	CTNND1	catenin delta 1	---	---	---	---	---	ENSOCUT00000021734	190838977	190840412	2	190838977,190839877	190839129,190840412	689	+	190836473-190838976	190840413-190844386
13:8489467|8498782	0	0	0	1.67902	2.29975	0	0	1.32626	1.32626	0.308178	0.820938	exon	ENSOCUT00000025663	ENSOCUG00000002976	ESYT2	extended synaptotagmin 2	---	---	---	---	---	ENSOCUT00000025663	8489467	8498782	5	8489467,8490641,8493930,8498383,8498693	8489508,8490775,8494006,8498455,8498782	417	+	8455006-8489466	8498783-8513519
14:96413056|96420449	0	0	3.14526	0	0	0	1.04842	0	-1.04842	0.334534	0.820938	exon	ENSOCUT00000003423	ENSOCUG00000003418	PARP14	poly(ADP-ribose) polymerase family member 14	---	---	---	---	---	ENSOCUT00000003423	96413056	96420449	6	96413056,96413518,96413905,96416736,96419113,96420213	96413223,96413580,96414054,96416814,96419334,96420449	919	-	96408055-96413055	96420450-96424854
19:32974666|32976339	0	1.5665	1.5665	0	0	0	1.04434	0	-1.04434	0.415139	0.820938	exon	ENSOCUT00000008461	ENSOCUG00000008462	TOM1L1	target of myb1 like 1 membrane trafficking protein	---	---	---	---	---	ENSOCUT00000008461	32974666	32976339	3	32974666,32975451,32976190	32974770,32975576,32976339	381	-	32973195-32974665	32976340-32982729
11:54060452|54061312	0	2.78358	2.29975	0	0	0	1.69444	0	-1.69444	0.229082	0.820938	exon	ENSOCUT00000014941	ENSOCUG00000014937	MTMR12	myotubularin related protein 12	---	---	---	---	---	ENSOCUT00000014941	54060452	54061312	2	54060452,54061206	54060576,54061312	232	-	54058039-54060451	54061313-54071652
19:49423546|49435227	0	0	0	0	2.29975	1.5665	0	1.28875	1.28875	0.315196	0.820938	exon	ENSOCUT00000012778	ENSOCUG00000012776	SMURF2	SMAD specific E3 ubiquitin protein ligase 2	---	---	---	---	---	ENSOCUT00000012778	49423546	49435227	4	49423546,49426120,49429123,49435143	49423630,49426322,49429206,49435227	457	-	49416536-49423545	49435228-49440794
21:6767913|6769993	0	0	0	1.67902	0	3.14526	0	1.60809	1.60809	0.241504	0.820938	exon	ENSOCUT00000011909	ENSOCUG00000011913	GPN3	GPN-loop GTPase 3	---	---	---	---	---	ENSOCUT00000011909	6767913	6769993	3	6767913,6768460,6769826	6768028,6768584,6769993	409	-	6767463-6767912	6769994-6775234
14:87087007|87107082	0	0	0	0	1.5665	2.78358	0	1.45003	1.45003	0.261483	0.820938	exon	ENSOCUT00000012697	ENSOCUG00000012695	CCDC50	coiled-coil domain containing 50	---	---	---	---	---	ENSOCUT00000012697	87087007	87107082	4	87087007,87087802,87092952,87106965	87087069,87087928,87093042,87107082	399	+	87060109-87087006	87107083-87112646
13:25017489|25023075	0	0	0	2.43409	3.14526	1.5665	0	2.38195	2.38195	0.127734	0.820938	exon	ENSOCUT00000004477	ENSOCUG00000004470	DCAF6	DDB1 and CUL4 associated factor 6	---	---	---	---	---	ENSOCUT00000004477	25017489	25023075	3	25017489,25020127,25022940	25017582,25020341,25023075	445	-	25015756-25017488	25023076-25028386
16:68743474|68746118	1.5665	0	1.5665	0	0	0	1.04434	0	-1.04434	0.415139	0.820938	exon	ENSOCUT00000006190	ENSOCUG00000006191	TMEM183A	transmembrane protein 183A	---	---	---	---	---	ENSOCUT00000006190	68743474	68746118	2	68743474,68745938	68743554,68746118	262	-	68739803-68743473	68746119-68747347
18:48112851|48124212	2.29975	0	2.29975	0	0	0	1.53317	0	-1.53317	0.266927	0.820938	exon	ENSOCUT00000029401	ENSOCUG00000026715	ERLIN1	ER lipid raft associated 1	---	---	---	---	---	ENSOCUT00000029401	48112851	48124212	5	48112851,48115448,48117857,48118831,48124131	48112924,48115573,48117918,48118877,48124212	391	-	48103368-48112850	48124213-48126553
7:127045479|127051110	1.5665	2.29975	1.5665	0	0	0	1.81092	0	-1.81092	0.22087	0.820938	exon	ENSOCUT00000017629	ENSOCUG00000017626	ITGAV	integrin subunit alpha V	---	---	---	---	---	ENSOCUT00000017629	127045479	127051110	5	127045479,127046519,127047206,127050601,127051030	127045546,127046666,127047298,127050680,127051110	470	+	127042369-127045478	127051111-127051876
2:113850781|114093004	0	0	1.5665	2.9272	0	2.29975	0.522168	1.74232	1.22015	0.444841	0.820938	exon	ENSOCUT00000015317,ENSOCUT00000033929	ENSOCUG00000015311	EXOC6B	exocyst complex component 6B	---	---	---	---	---	ENSOCUT00000015317	113850781	114093004	14	113850781,113868078,113927257,113927688,113929348,113936108,113937190,113939869,113940814,113946174,113962425,113970749,114048155,114092931	113850957,113868146,113927340,113927734,113929468,113936179,113937287,113939974,113940923,113946285,113962559,113970928,114048296,114093004	1527	+	113711758-113850780	114093005-114248658
1:122391464|122418506	0	0	0	1.67902	0	1.5665	0	1.08184	1.08184	0.392701	0.820938	exon	ENSOCUT00000014903	ENSOCUG00000014899	MRE11	MRE11 homolog, double strand break repair nuclease	---	---	---	---	---	ENSOCUT00000014903	122391464	122418506	8	122391464,122393250,122398665,122400662,122408580,122412781,122416546,122418333	122391605,122393364,122398850,122400833,122408660,122412907,122416646,122418506	1098	+	122390329-122391463	122418507-122430102
2:149917455|149917628	1.5665	0	1.5665	0	0	0	1.04434	0	-1.04434	0.415139	0.820938	exon	ENSOCUT00000001596	ENSOCUG00000001595	CRIM1	cysteine rich transmembrane BMP regulator 1	---	---	---	---	---	ENSOCUT00000001596	149917455	149917628	1	149917455	149917628	174	-	149868037-149917454	---
12:62638893|62670511	0	0	0	1.67902	0	1.5665	0	1.08184	1.08184	0.392701	0.820938	exon	ENSOCUT00000021457	ENSOCUG00000010714	SENP6	SUMO1/sentrin specific peptidase 6	---	---	---	---	---	ENSOCUT00000021457	62638893	62670511	11	62638893,62641885,62647334,62647744,62648866,62650693,62650922,62655500,62659045,62662108,62670408	62639122,62642055,62647367,62647938,62649092,62650802,62651038,62655619,62659137,62662535,62670511	1829	+	62632973-62638892	62670512-62672428
1:12878373|12884536	0	0	0	1.67902	0	2.78358	0	1.48753	1.48753	0.257503	0.820938	exon	ENSOCUT00000004244	ENSOCUG00000004242	TEX10	testis expressed 10	---	---	---	---	---	ENSOCUT00000004244	12878373	12884536	2	12878373,12884448	12878550,12884536	267	+	12876724-12878372	12884537-12888567
7:23365342|23377944	0	0	0	1.67902	2.29975	3.4342	0	2.47099	2.47099	0.115227	0.820938	exon	ENSOCUT00000003350	ENSOCUG00000003351	FAM3C	family with sequence similarity 3 member C	---	---	---	---	---	ENSOCUT00000003350	23365342	23377944	4	23365342,23370162,23377091,23377821	23365396,23370266,23377120,23377944	314	+	23352809-23365341	23377945-23386188
4:4996520|5006192	0	0	1.5665	0	2.78358	2.29975	0.522168	1.69444	1.17227	0.462339	0.820938	exon	ENSOCUT00000009642	ENSOCUG00000009637	NCOA6	nuclear receptor coactivator 6	---	---	---	---	---	ENSOCUT00000009642	4996520	5006192	3	4996520,5000479,5006044	4996588,5000515,5006192	255	+	4992610-4996519	5006193-5018379
5:4227436|4246428	1.5665	0	1.5665	0	0	0	1.04434	0	-1.04434	0.415139	0.820938	exon	ENSOCUT00000001465	ENSOCUG00000001464	UBA2	ubiquitin like modifier activating enzyme 2	---	---	---	---	---	ENSOCUT00000001465	4227436	4246428	8	4227436,4228951,4230480,4231697,4234319,4242941,4243412,4246329	4227519,4229021,4230544,4231797,4234440,4243008,4243533,4246428	733	+	4225183-4227435	4246429-4248712
17:56982588|57049978	0	0	0	0	1.5665	1.5665	0	1.04434	1.04434	0.404744	0.820938	exon	ENSOCUT00000003201	ENSOCUG00000003198	MIPOL1	mirror-image polydactyly 1	---	---	---	---	---	ENSOCUT00000003201	56982588	57049978	4	56982588,57000693,57000986,57049871	56982717,57000726,57001156,57049978	443	+	56965440-56982587	57049979-57129350
17:76799399|76804228	1.5665	0	1.5665	0	0	0	1.04434	0	-1.04434	0.415139	0.820938	exon	ENSOCUT00000007146	ENSOCUG00000007145	KIAA0586	KIAA0586	---	---	---	---	---	ENSOCUT00000007146	76799399	76804228	3	76799399,76801454,76804110	76799479,76801647,76804228	394	+	76798153-76799398	76804229-76807483
13:22130509|22141977	0	0	0	0	2.29975	1.5665	0	1.28875	1.28875	0.315196	0.820938	exon	ENSOCUT00000013833	ENSOCUG00000013824	KIFAP3	kinesin associated protein 3	---	---	---	---	---	ENSOCUT00000013833	22130509	22141977	5	22130509,22131277,22131847,22135156,22141877	22130634,22131442,22131959,22135264,22141977	615	-	22123074-22130508	22141978-22184073
16:52847248|52861520	0	0	0	0	1.5665	2.29975	0	1.28875	1.28875	0.315196	0.820938	exon	ENSOCUT00000010439	ENSOCUG00000010431	RAB3GAP2	RAB3 GTPase activating non-catalytic protein subunit 2	---	---	---	---	---	ENSOCUT00000010439	52847248	52861520	5	52847248,52847377,52847766,52860594,52861422	52847295,52847452,52847867,52860693,52861520	425	+	52834784-52847247	52861521-52867539
15:74581845|74583836	0	0	0	1.67902	1.5665	2.78358	0	2.0097	2.0097	0.174939	0.820938	exon	ENSOCUT00000014643	ENSOCUG00000014641	USO1	USO1 vesicle transport factor	---	---	---	---	---	ENSOCUT00000014643	74581845	74583836	4	74581845,74582987,74583313,74583726	74581966,74583168,74583431,74583836	534	-	74577966-74581844	74583837-74593077
3:11795015|11807055	1.5665	1.5665	0	0	0	0	1.04434	0	-1.04434	0.415139	0.820938	exon	ENSOCUT00000001812	ENSOCUG00000001808	SLC12A2	solute carrier family 12 member 2	---	---	---	---	---	ENSOCUT00000001812	11795015	11807055	7	11795015,11797040,11798082,11799283,11801303,11805321,11806915	11795122,11797163,11798183,11799438,11801402,11805432,11807055	843	+	11790877-11795014	11807056-11813281
2:138883785|138886018	0	0	0	1.67902	1.5665	0	0	1.08184	1.08184	0.392701	0.820938	exon	ENSOCUT00000009577	ENSOCUG00000009576	MSH2	mutS homolog 2	---	---	---	---	---	ENSOCUT00000009577	138883785	138886018	2	138883785,138885895	138883935,138886018	275	-	138880941-138883784	138886019-138897712
17:23302096|23304536	0	0	0	1.67902	3.14526	1.5665	0	2.13026	2.13026	0.150935	0.820938	exon	ENSOCUT00000006453,ENSOCUT00000033791	ENSOCUG00000006455	COPS2	COP9 signalosome subunit 2	---	---	---	---	---	ENSOCUT00000033791	23302096	23304536	3	23302096,23303203,23304465	23302193,23303285,23304536	253	+	23298730-23302095	---
20:16067377|16067933	0	0	0	0	1.5665	1.5665	0	1.04434	1.04434	0.404744	0.820938	exon	ENSOCUT00000004393	ENSOCUG00000004392	FOXN3	forkhead box N3	---	---	---	---	---	ENSOCUT00000004393	16067377	16067933	1	16067377	16067933	557	+	16066480-16067376	16067934-16123543
9:49578650|49578883	1.5665	1.5665	0	0	0	0	1.04434	0	-1.04434	0.415139	0.820938	exon	ENSOCUT00000005079,ENSOCUT00000015860	ENSOCUG00000005079	---	---	---	---	---	---	---	ENSOCUT00000005079	49578650	49578883	1	49578650	49578883	234	+	49519806-49578649	49578884-49598729
7:159833412|159839603	3.4342	0	0	0	0	0	1.14473	0	-1.14473	0.294414	0.820938	exon	ENSOCUT00000012517	ENSOCUG00000012513	USP37	ubiquitin specific peptidase 37	---	---	---	---	---	ENSOCUT00000012517	159833412	159839603	4	159833412,159834001,159837454,159839432	159833489,159834179,159837554,159839603	530	-	159819485-159833411	159839604-159843507
12:121919542|121933251	1.5665	1.5665	0	0	0	0	1.04434	0	-1.04434	0.415139	0.820938	exon	ENSOCUT00000014442	ENSOCUG00000014432	ENPP3	ectonucleotide pyrophosphatase/phosphodiesterase 3	---	---	---	---	---	ENSOCUT00000014442	121919542	121933251	8	121919542,121922485,121923143,121923644,121924424,121931392,121932713,121933220	121919621,121922604,121923252,121923709,121924496,121931500,121932841,121933251	719	+	121909261-121919541	121933252-121945623
1:130734597|130786351	1.5665	0	1.5665	0	0	0	1.04434	0	-1.04434	0.415139	0.820938	exon	ENSOCUT00000022875	ENSOCUG00000023809	PICALM	phosphatidylinositol binding clathrin assembly protein	---	---	---	---	---	ENSOCUT00000022875	130734597	130786351	20	130734597,130738474,130742600,130746068,130748859,130751164,130753111,130758312,130761133,130761177,130761510,130763814,130769093,130776684,130779021,130779247,130779438,130782169,130783588,130786247	130734739,130738549,130742702,130746161,130748970,130751270,130753152,130758397,130761175,130761257,130761646,130763917,130769242,130776791,130779152,130779277,130779537,130782192,130783647,130786351	1838	+	130688015-130734596	---
3:109407929|109409491	0	0	0	0	1.5665	1.5665	0	1.04434	1.04434	0.404744	0.820938	exon	ENSOCUT00000010397	ENSOCUG00000010390	TMEM67	transmembrane protein 67	---	---	---	---	---	ENSOCUT00000010397	109407929	109409491	4	109407929,109408220,109409011,109409426	109408083,109408328,109409097,109409491	417	+	109405708-109407928	109409492-109414568
4:48201256|48207625	3.14526	2.29975	1.5665	0	1.5665	1.5665	2.33717	1.04434	-1.29284	0.485961	0.820938	exon	ENSOCUT00000013501	ENSOCUG00000013505	CPSF6	cleavage and polyadenylation specific factor 6	---	---	---	---	---	ENSOCUT00000013501	48201256	48207625	7	48201256,48202280,48202583,48203148,48203828,48204706,48207436	48201401,48202453,48202693,48203652,48203943,48204859,48207625	1396	+	48197079-48201255	48207626-48214242
12:72570295|72584321	0	2.78358	1.5665	0	0	0	1.45003	0	-1.45003	0.271531	0.820938	exon	ENSOCUT00000030045,ENSOCUT00000008943	ENSOCUG00000008929	SNX14	sorting nexin 14	---	---	---	---	---	ENSOCUT00000008943	72570295	72584321	5	72570295,72570552,72574639,72580985,72584238	72570414,72570592,72574750,72581085,72584321	458	-	72564254-72570294	72584322-72589433
10:45056744|45058588	0	0	0	1.67902	0	2.29975	0	1.32626	1.32626	0.308178	0.820938	exon	ENSOCUT00000002425	ENSOCUG00000002419	OGDH	oxoglutarate dehydrogenase	---	---	---	---	---	ENSOCUT00000002425	45056744	45058588	2	45056744,45058486	45056917,45058588	277	+	45044783-45056743	45058589-45065464
1:143449276|143479965	0	0	0	1.67902	3.14526	1.5665	0	2.13026	2.13026	0.150935	0.820938	exon	ENSOCUT00000026628	ENSOCUG00000010457	FCHSD2	FCH and double SH3 domains 2	---	---	---	---	---	ENSOCUT00000026628	143449276	143479965	5	143449276,143464577,143474422,143478981,143479837	143449352,143464721,143474555,143479035,143479965	540	+	143376790-143449275	143479966-143543859
17:56934718|57001156	0	0	0	1.67902	0	2.78358	0	1.48753	1.48753	0.257503	0.820938	exon_intron	ENSOCUT00000003201	ENSOCUG00000003198	MIPOL1	mirror-image polydactyly 1	---	---	---	---	---	ENSOCUT00000003201	56934718	57001156	8	56934718,56940723,56961372,56963880,56965334,56982588,57000693,57000986	56940168,56940801,56961603,56964015,56965439,56982717,57000726,57001156	6339	+	---	57001157-57049870
18:51928187|51934232	0	1.5665	0	2.43409	2.29975	2.29975	0.522168	2.34453	1.82236	0.353577	0.820938	exon	ENSOCUT00000003039	ENSOCUG00000003035	SLK	STE20 like kinase	---	---	---	---	---	ENSOCUT00000003039	51928187	51934232	4	51928187,51928937,51929951,51934107	51928316,51929061,51930139,51934232	570	+	51919469-51928186	51934233-51936570
3:19993014|20015679	0	1.5665	0	1.67902	0	3.14526	0.522168	1.60809	1.08593	0.459488	0.820938	exon	ENSOCUT00000007561	ENSOCUG00000007560	KLHL3	kelch like family member 3	---	---	---	---	---	ENSOCUT00000007561	19993014	20015679	3	19993014,20002668,20015573	19993179,20002789,20015679	395	-	19977284-19993013	20015680-20028959
12:12233343|12240321	0	0	0	0	3.4342	0	0	1.14473	1.14473	0.287889	0.820938	exon	ENSOCUT00000000728	ENSOCUG00000000728	GMNN	geminin, DNA replication inhibitor	---	---	---	---	---	ENSOCUT00000000728	12233343	12240321	4	12233343,12235757,12236866,12240264	12233425,12235904,12236943,12240321	367	-	12232772-12233342	---
17:6562448|6562780	0	0	0	0	1.5665	2.29975	0	1.28875	1.28875	0.315196	0.820938	exon_intron	ENSOCUT00000007964	ENSOCUG00000007953	DENND4A	DENN domain containing 4A	---	---	---	---	---	ENSOCUT00000007964	6562448	6562780	1	6562448	6562780	333	+	---	6562781-6569103
17:7795129|7800935	1.5665	1.5665	0	0	0	0	1.04434	0	-1.04434	0.415139	0.820938	exon	ENSOCUT00000002321	ENSOCUG00000002322	TRIP4	thyroid hormone receptor interactor 4	---	---	---	---	---	ENSOCUT00000002321	7795129	7800935	3	7795129,7796938,7800748	7795220,7797062,7800935	405	-	7779945-7795128	7800936-7807622
21:8086269|8087467	1.5665	1.5665	2.29975	0	0	0	1.81092	0	-1.81092	0.22087	0.820938	exon	ENSOCUT00000007588	ENSOCUG00000007589	TRAFD1	TRAF-type zinc finger domain containing 1	---	---	---	---	---	ENSOCUT00000007588	8086269	8087467	2	8086269,8087261	8086674,8087467	613	+	8080438-8086268	8087468-8098263
8:5525245|5532970	0	0	0	0	1.5665	1.5665	0	1.04434	1.04434	0.404744	0.820938	exon	ENSOCUT00000007867	ENSOCUG00000007857	LRRK2	leucine rich repeat kinase 2	---	---	---	---	---	ENSOCUT00000007867	5525245	5532970	4	5525245,5525912,5527194,5532810	5525439,5526012,5527364,5532970	628	-	5521913-5525244	5532971-5539895
13:20118918|20190424	0	1.5665	0	1.67902	1.5665	2.29975	0.522168	1.84843	1.32626	0.477845	0.820938	exon	ENSOCUT00000007593	ENSOCUG00000007590	SUCO	SUN domain containing ossification factor	---	---	---	---	---	ENSOCUT00000007593	20118918	20190424	25	20118918,20119444,20121335,20125059,20126956,20138609,20139425,20148010,20149138,20150013,20150270,20152916,20154928,20164450,20165015,20166856,20178058,20180272,20182773,20184185,20184561,20184888,20187384,20187863,20190310	20119009,20119598,20121439,20125146,20128101,20138699,20139493,20148078,20149229,20150068,20150290,20153021,20155035,20164517,20165139,20166979,20178208,20180409,20182830,20184194,20184609,20184900,20187411,20187973,20190424	3188	-	20093208-20118917	20190425-20190437
14:163525526|163526699	0	2.29975	0	2.43409	2.29975	3.14526	0.766583	2.62637	1.85978	0.46816	0.820938	exon	ENSOCUT00000004817	ENSOCUG00000004806	PCNT	pericentrin	---	---	---	---	---	ENSOCUT00000004817	163525526	163526699	2	163525526,163526595	163525758,163526699	338	-	163523256-163525525	163526700-163539503
12:74367023|74384605	1.5665	0	1.5665	0	0	0	1.04434	0	-1.04434	0.415139	0.820938	exon	ENSOCUT00000004872	ENSOCUG00000004871	RARS2	arginyl-tRNA synthetase 2, mitochondrial	---	---	---	---	---	ENSOCUT00000004872	74367023	74384605	4	74367023,74374542,74376529,74384532	74367120,74374625,74376628,74384605	356	-	74359921-74367022	74384606-74394970
2:139274071|139303146	0	0	0	1.67902	2.29975	0	0	1.32626	1.32626	0.308178	0.820938	exon	ENSOCUT00000033368,ENSOCUT00000007794	ENSOCUG00000007788	TTC7A	tetratricopeptide repeat domain 7A	---	---	---	---	---	ENSOCUT00000007794	139274071	139303146	10	139274071,139278241,139279353,139281249,139288373,139292585,139293184,139301611,139302248,139303068	139274231,139278313,139279410,139281366,139288477,139292668,139293321,139301674,139302405,139303146	1038	-	139260275-139274070	139303147-139312088
19:3158298|3181713	0	0	1.5665	1.67902	2.29975	1.5665	0.522168	1.84843	1.32626	0.477845	0.820938	exon	ENSOCUT00000013393	ENSOCUG00000013388	ULK2	unc-51 like autophagy activating kinase 2	---	---	---	---	---	ENSOCUT00000013393	3158298	3181713	8	3158298,3164536,3164951,3174833,3176803,3177893,3180022,3181540	3158469,3164624,3164998,3174915,3176861,3177994,3180095,3181713	801	-	3151158-3158297	3181714-3185016
11:54056527|54058038	0	0	0	0	2.78358	3.14526	0	1.97628	1.97628	0.17816	0.820938	exon	ENSOCUT00000014941	ENSOCUG00000014937	MTMR12	myotubularin related protein 12	---	---	---	---	---	ENSOCUT00000014941	54056527	54058038	2	54056527,54057960	54056597,54058038	150	-	54051817-54056526	54058039-54060451
16:49046459|49050960	1.5665	0	2.29975	0	0	0	1.28875	0	-1.28875	0.324028	0.820938	exon	ENSOCUT00000005533	ENSOCUG00000005530	NVL	nuclear VCP-like	---	---	---	---	---	ENSOCUT00000005533	49046459	49050960	2	49046459,49050861	49046578,49050960	220	+	49041823-49046458	49050961-49065302
16:2971604|2980003	2.29975	0	1.5665	0	0	0	1.28875	0	-1.28875	0.324028	0.820938	exon	ENSOCUT00000008267	ENSOCUG00000008269	---	---	---	---	---	---	---	ENSOCUT00000008267	2971604	2980003	6	2971604,2973362,2974392,2976884,2978233,2979910	2971829,2973579,2974682,2977013,2978345,2980003	1072	-	2959896-2971603	2980004-2980720
4:6978660|6981052	4.72815	2.29975	0	0	0	0	2.34263	0	-2.34263	0.144843	0.820938	exon	ENSOCUT00000029890	ENSOCUG00000021741	---	---	---	---	---	---	---	ENSOCUT00000029890	6978660	6981052	2	6978660,6980970	6978768,6981052	192	-	6932542-6978659	6981053-7016922
7:64915158|64936382	1.5665	0	1.5665	0	0	0	1.04434	0	-1.04434	0.415139	0.820938	exon	ENSOCUT00000033777,ENSOCUT00000005935	ENSOCUG00000005932	CCDC93	coiled-coil domain-containing protein 93	---	---	---	---	---	ENSOCUT00000005935	64915158	64936382	5	64915158,64917951,64918321,64919564,64936266	64915194,64918043,64918371,64919650,64936382	385	+	64905937-64915157	64936383-64944160
8:50075221|50087221	1.5665	2.29975	2.29975	0	0	0	2.05533	0	-2.05533	0.182249	0.820938	exon	ENSOCUT00000007276	ENSOCUG00000007277	GPALPP1	GPALPP motifs containing 1	---	---	---	---	---	ENSOCUT00000007276	50075221	50087221	5	50075221,50076148,50080120,50086214,50087089	50075385,50076279,50080228,50086318,50087221	644	-	50071950-50075220	50087222-50095089
4:83930690|83947164	0	0	0	1.67902	1.5665	0	0	1.08184	1.08184	0.392701	0.820938	exon	ENSOCUT00000016751	ENSOCUG00000016750	SLC41A2	solute carrier family 41 member 2	---	---	---	---	---	ENSOCUT00000016751	83930690	83947164	4	83930690,83934666,83938535,83947057	83930836,83934810,83938606,83947164	472	-	83909576-83930689	83947165-83953222
16:6273161|6279889	0	1.5665	0	1.67902	1.5665	2.78358	0.522168	2.0097	1.48753	0.413306	0.820938	exon	ENSOCUT00000004714	ENSOCUG00000004713	---	---	---	---	---	---	---	ENSOCUT00000004714	6273161	6279889	3	6273161,6273820,6279783	6273273,6273935,6279889	336	-	6268443-6273160	6279890-6332655
1:70145664|70146991	0	0	0	2.43409	0	2.78358	0	1.73922	1.73922	0.215519	0.820938	exon	ENSOCUT00000016897	ENSOCUG00000016888	IARS	isoleucyl-tRNA synthetase	---	---	---	---	---	ENSOCUT00000016897	70145664	70146991	3	70145664,70146023,70146866	70145783,70146179,70146991	403	-	70141269-70145663	70146992-70155971
15:66519293|66567223	1.5665	0	1.5665	0	0	0	1.04434	0	-1.04434	0.415139	0.820938	exon	ENSOCUT00000012439	ENSOCUG00000012421	PTPN13	protein tyrosine phosphatase, non-receptor type 13	---	---	---	---	---	ENSOCUT00000012439	66519293	66567223	18	66519293,66519619,66520834,66522814,66524334,66525340,66525613,66526918,66542219,66545052,66545801,66547423,66554856,66557450,66560113,66561770,66565242,66567008	66519507,66519717,66521198,66522997,66524492,66525511,66525823,66526988,66542280,66545145,66545938,66547511,66554911,66557553,66560261,66561860,66565582,66567223	2816	+	66517590-66519292	66567224-66570096
8:43984999|44002231	0	0	0	1.67902	2.29975	1.5665	0	1.84843	1.84843	0.208882	0.820938	exon	ENSOCUT00000003417	ENSOCUG00000003414	IFT88	intraflagellar transport 88	---	---	---	---	---	ENSOCUT00000003417	43984999	44002231	5	43984999,43994874,43998251,44000582,44002129	43985085,43994944,43998482,44000696,44002231	608	-	43963189-43984998	44002232-44003601
2:137896969|137922516	2.29975	0	2.29975	0	0	0	1.53317	0	-1.53317	0.266927	0.820938	exon	ENSOCUT00000030821	ENSOCUG00000006967	PPP1R21	protein phosphatase 1 regulatory subunit 21	---	---	---	---	---	ENSOCUT00000030821	137896969	137922516	11	137896969,137902091,137902268,137906997,137907622,137912470,137913842,137914076,137916260,137918095,137922448	137897105,137902179,137902369,137907146,137907674,137912564,137913900,137914240,137916358,137918241,137922516	1165	-	137884894-137896968	137922517-137936831
14:108156233|108177788	1.5665	1.5665	0	1.67902	3.4342	3.88098	1.04434	2.99807	1.95373	0.293163	0.820938	exon	ENSOCUT00000000727	ENSOCUG00000000727	NECTIN3	nectin cell adhesion molecule 3	---	---	---	---	---	ENSOCUT00000000727	108156233	108177788	4	108156233,108169163,108174031,108177447	108156384,108169280,108174327,108177788	909	-	108148761-108156232	108177789-108221078
7:110728877|110729227	1.5665	1.5665	0	2.43409	2.78358	3.4342	1.04434	2.88396	1.83962	0.35573	0.820938	exon	ENSOCUT00000012685	ENSOCUG00000012680	TLK1	tousled like kinase 1	---	---	---	---	---	ENSOCUT00000012685	110728877	110729227	2	110728877,110729117	110729013,110729227	248	-	110726315-110728876	110729228-110730873
2:29110013|29114925	0	1.5665	1.5665	0	0	0	1.04434	0	-1.04434	0.415139	0.820938	exon	ENSOCUT00000005887	ENSOCUG00000005880	PDS5A	PDS5 cohesin associated factor A	---	---	---	---	---	ENSOCUT00000005887	29110013	29114925	4	29110013,29111274,29113821,29114802	29110149,29111342,29113979,29114925	489	-	29105783-29110012	29114926-29118271
3:10296668|10304987	0	0	0	1.67902	0	1.5665	0	1.08184	1.08184	0.392701	0.820938	exon	ENSOCUT00000025269	ENSOCUG00000016248	GRAMD2B	GRAM domain containing 2B	---	---	---	---	---	ENSOCUT00000025269	10296668	10304987	4	10296668,10300376,10303586,10304884	10296787,10300487,10303652,10304987	403	+	10255705-10296667	10304988-10308531
1:172308380|172311987	3.14526	1.5665	1.5665	0	1.5665	0	2.09276	0.522168	-1.57059	0.3737	0.820938	exon	ENSOCUT00000015384	ENSOCUG00000015381	QSER1	glutamine and serine rich 1	---	---	---	---	---	ENSOCUT00000015384	172308380	172311987	4	172308380,172309943,172310562,172311770	172308702,172310059,172310695,172311987	792	+	172294598-172308379	172311988-172320584
9:4564594|4565038	0	1.5665	2.29975	0	0	0	1.28875	0	-1.28875	0.324028	0.820938	exon	ENSOCUT00000005461	ENSOCUG00000005460	WDR48	WD repeat domain 48	---	---	---	---	---	ENSOCUT00000005461	4564594	4565038	2	4564594,4564931	4564690,4565038	205	-	4563880-4564593	4565039-4571175
3:14829042|14852513	2.29975	0	1.5665	0	0	0	1.28875	0	-1.28875	0.324028	0.820938	exon	ENSOCUT00000027139	ENSOCUG00000024304	FNIP1	folliculin interacting protein 1	---	---	---	---	---	ENSOCUT00000027139	14829042	14852513	8	14829042,14832963,14835213,14840338,14841684,14849793,14852051,14852413	14829127,14833164,14835348,14840409,14841767,14849884,14852125,14852513	848	-	14817881-14829041	14852514-14863422
16:23664693|23845064	0	0	0	1.67902	0	1.5665	0	1.08184	1.08184	0.392701	0.820938	exon	ENSOCUT00000015911	ENSOCUG00000015901	AKT3	AKT serine/threonine kinase 3	---	---	---	---	---	ENSOCUT00000015911	23664693	23845064	4	23664693,23800036,23835700,23844920	23664850,23800161,23835811,23845064	541	+	---	23845065-23854340
7:16952875|16959169	0	2.29975	2.29975	0	0	0	1.53317	0	-1.53317	0.266927	0.820938	exon	ENSOCUT00000002127	ENSOCUG00000002127	ZNF800	zinc finger protein 800	---	---	---	---	---	ENSOCUT00000002127	16952875	16959169	2	16952875,16957477	16953018,16959169	1837	+	16936615-16952874	16959170-16960372
7:82546600|82553736	0	0	0	0	1.5665	1.5665	0	1.04434	1.04434	0.404744	0.820938	exon	ENSOCUT00000002103	ENSOCUG00000002102	GTDC1	glycosyltransferase like domain containing 1	---	---	---	---	---	ENSOCUT00000002103	82546600	82553736	2	82546600,82553569	82546773,82553736	342	-	82404751-82546599	82553737-82628831
2:125005387|125012893	0	0	0	1.67902	1.5665	0	0	1.08184	1.08184	0.392701	0.820938	exon	ENSOCUT00000027359	ENSOCUG00000017819	USP34	ubiquitin specific peptidase 34	---	---	---	---	---	ENSOCUT00000027359	125005387	125012893	5	125005387,125008887,125009019,125009200,125012789	125005538,125008935,125009123,125009244,125012893	456	+	125004306-125005386	125012894-125014290
1:123212212|123217369	2.29975	0	3.14526	0	1.5665	0	1.815	0.522168	-1.29284	0.417322	0.820938	exon	ENSOCUT00000033772	ENSOCUG00000029678	CEP295	centrosomal protein 295	---	---	---	---	---	ENSOCUT00000033772	123212212	123217369	3	123212212,123213957,123217272	123212386,123217032,123217369	3349	-	123211730-123212211	123217370-123218799
15:43280594|43320786	0	0	0	0	2.29975	1.5665	0	1.28875	1.28875	0.315196	0.820938	exon	ENSOCUT00000008521	ENSOCUG00000008514	TBCK	TBC1 domain containing kinase	---	---	---	---	---	ENSOCUT00000008521	43280594	43320786	4	43280594,43289445,43319949,43320713	43280815,43289517,43320063,43320786	484	+	---	43320787-43335478
9:114759747|114908984	0	3.14526	0	0	0	0	1.04842	0	-1.04842	0.334534	0.820938	exon	ENSOCUT00000004014	ENSOCUG00000004015	ZNF407	zinc finger protein 407	---	---	---	---	---	ENSOCUT00000004014	114759747	114908984	3	114759747,114770456,114908910	114764442,114770570,114908984	4886	+	114733749-114759746	114908985-115001159
13:95760220|95787320	1.5665	0	0	1.67902	2.78358	2.29975	0.522168	2.25412	1.73195	0.361128	0.820938	exon	ENSOCUT00000002010,ENSOCUT00000033226	ENSOCUG00000002007	ANKRD13C	ankyrin repeat domain 13C	---	---	---	---	---	ENSOCUT00000002010	95760220	95787320	6	95760220,95762378,95767186,95772038,95783428,95787159	95760305,95762423,95767252,95772182,95783559,95787320	638	+	95750141-95760219	95787321-95812954
11:35371919|35378568	1.5665	0	1.5665	0	0	0	1.04434	0	-1.04434	0.415139	0.820938	exon	ENSOCUT00000033840,ENSOCUT00000005747	ENSOCUG00000005741	MARCH6	membrane associated ring-CH-type finger 6	---	---	---	---	---	ENSOCUT00000005747	35371919	35378568	4	35371919,35375489,35377624,35378536	35372087,35375678,35377685,35378568	454	+	35367586-35371918	35378569-35383367
7:109664280|109664521	0	0	0	1.67902	2.29975	2.29975	0	2.09284	2.09284	0.172525	0.820938	exon	ENSOCUT00000006645	ENSOCUG00000006646	UBR3	ubiquitin protein ligase E3 component n-recognin 3 (putative)	---	---	---	---	---	ENSOCUT00000006645	109664280	109664521	2	109664280,109664432	109664345,109664521	156	+	109652276-109664279	109664522-109665941
13:50592446|50601160	1.5665	2.78358	0	0	0	0	1.45003	0	-1.45003	0.271531	0.820938	exon	ENSOCUT00000017383	ENSOCUG00000017382	MAGI3	membrane associated guanylate kinase, WW and PDZ domain containing 3	---	---	---	---	---	ENSOCUT00000017383	50592446	50601160	3	50592446,50595412,50600951	50592525,50595586,50601160	465	-	50580119-50592445	50601161-50605882
11:81761314|81763706	1.5665	1.5665	0	0	0	0	1.04434	0	-1.04434	0.415139	0.820938	exon	ENSOCUT00000021694	ENSOCUG00000026707	TRIM23	tripartite motif containing 23	---	---	---	---	---	ENSOCUT00000021694	81761314	81763706	2	81761314,81763544	81761435,81763706	285	-	81758388-81761313	81763707-81768095
12:95592056|95594160	1.5665	1.5665	0	0	0	0	1.04434	0	-1.04434	0.415139	0.820938	exon	ENSOCUT00000024017	ENSOCUG00000027804	SOBP	sine oculis binding protein homolog	---	---	---	---	---	ENSOCUT00000024017	95592056	95594160	2	95592056,95593975	95592194,95594160	325	+	95579779-95592055	95594161-95619712
20:16587648|16593169	0	0	0	1.67902	2.78358	1.5665	0	2.0097	2.0097	0.174939	0.820938	exon	ENSOCUT00000015556	ENSOCUG00000015555	TTC8	tetratricopeptide repeat domain 8	---	---	---	---	---	ENSOCUT00000015556	16587648	16593169	5	16587648,16591213,16591515,16591780,16593049	16587692,16591302,16591674,16591843,16593169	480	-	16576332-16587647	16593170-16607415
8:100626832|100629570	0	0	0	2.9272	2.29975	0	0	1.74232	1.74232	0.213494	0.820938	exon	ENSOCUT00000022682,ENSOCUT00000002995	ENSOCUG00000002984	DOCK9	dedicator of cytokinesis 9	---	---	---	---	---	ENSOCUT00000002995	100626832	100629570	4	100626832,100629010,100629219,100629491	100626924,100629075,100629406,100629570	427	-	100625632-100626831	100629571-100641017
19:3292466|3295652	0	0	0	2.43409	1.5665	0	0	1.33353	1.33353	0.301396	0.820938	exon	ENSOCUT00000013407	ENSOCUG00000013402	AKAP10	A-kinase anchoring protein 10	---	---	---	---	---	ENSOCUT00000013407	3292466	3295652	2	3292466,3295470	3293023,3295652	741	-	3274097-3292465	3295653-3305912
17:602289|610762	2.29975	1.5665	2.78358	0	0	0	2.21661	0	-2.21661	0.155931	0.820938	exon	ENSOCUT00000022379	ENSOCUG00000017425	MYO9A	myosin IXA	---	---	---	---	---	ENSOCUT00000022379	602289	610762	4	602289,605742,609598,610646	602401,605854,609821,610762	567	+	591264-602288	610763-613239
5:28935488|28936463	1.5665	1.5665	3.88098	0	0	2.29975	2.338	0.766583	-1.57141	0.452613	0.820938	exon	ENSOCUT00000004142	ENSOCUG00000004139	SF3B3	splicing factor 3b subunit 3	---	---	---	---	---	ENSOCUT00000004142	28935488	28936463	2	28935488,28936341	28935642,28936463	278	-	28931071-28935487	28936464-28940891
12:72570295|72613553	1.5665	1.5665	0	0	0	0	1.04434	0	-1.04434	0.415139	0.820938	exon	ENSOCUT00000030045,ENSOCUT00000008943	ENSOCUG00000008929	SNX14	sorting nexin 14	---	---	---	---	---	ENSOCUT00000008943	72570295	72613553	14	72570295,72570552,72574639,72580985,72584238,72589434,72595829,72598631,72601643,72602179,72602657,72613132,72613340,72613509	72570414,72570592,72574750,72581085,72584321,72589635,72595961,72598657,72601701,72602303,72602812,72613246,72613420,72613553	1401	-	72564254-72570294	72613554-72614631
17:28783612|28789719	3.4342	1.5665	2.29975	0	2.29975	0	2.43348	0.766583	-1.6669	0.483462	0.820938	exon	ENSOCUT00000031986	ENSOCUG00000029198	---	---	---	---	---	---	---	ENSOCUT00000031986	28783612	28789719	4	28783612,28785065,28786608,28789511	28783778,28785191,28786702,28789719	598	+	28780705-28783611	28789720-28790147
17:6815813|6817872	0	0	0	1.67902	1.5665	0	0	1.08184	1.08184	0.392701	0.820938	exon	ENSOCUT00000024820	ENSOCUG00000011751	DPP8	dipeptidyl peptidase 8	---	---	---	---	---	ENSOCUT00000024820	6815813	6817872	3	6815813,6817137,6817811	6815923,6817265,6817872	302	+	6808243-6815812	6817873-6819273
4:75476810|75482995	0	2.29975	1.5665	0	0	0	1.28875	0	-1.28875	0.324028	0.820938	exon	ENSOCUT00000013587	ENSOCUG00000013583	CDK17	cyclin dependent kinase 17	---	---	---	---	---	ENSOCUT00000013587	75476810	75482995	5	75476810,75477854,75479648,75480245,75482875	75476900,75477896,75479753,75480342,75482995	459	-	75475783-75476809	75482996-75486914
9:53162345|53164636	2.29975	0	0	2.43409	3.88098	1.5665	0.766583	2.62719	1.86061	0.40903	0.820938	exon	ENSOCUT00000013230	ENSOCUG00000013230	MTCL1	microtubule crosslinking factor 1	---	---	---	---	---	ENSOCUT00000013230	53162345	53164636	2	53162345,53164412	53162503,53164636	384	-	53098064-53162344	53164637-53176193
2:95718998|95720927	1.5665	1.5665	0	0	0	0	1.04434	0	-1.04434	0.415139	0.820938	exon	ENSOCUT00000010564	ENSOCUG00000010565	TPCN3	two pore channel 3	---	---	---	---	---	ENSOCUT00000010564	95718998	95720927	2	95718998,95720743	95719140,95720927	328	+	95716917-95718997	95720928-95722933
2:100225457|100227444	0	2.29975	3.4342	0	0	0	1.91132	0	-1.91132	0.201148	0.820938	exon	ENSOCUT00000010172	ENSOCUG00000010161	---	---	---	---	---	---	---	ENSOCUT00000010172	100225457	100227444	4	100225457,100226406,100227210,100227384	100225507,100226550,100227295,100227444	343	-	100223897-100225456	100227445-100227723
11:78494363|78503647	0	0	0	0	1.5665	1.5665	0	1.04434	1.04434	0.404744	0.820938	exon	ENSOCUT00000004866	ENSOCUG00000004862	---	---	---	---	---	---	---	ENSOCUT00000004866	78494363	78503647	4	78494363,78498249,78502691,78503495	78494411,78498319,78502883,78503647	466	+	78488784-78494362	78503648-78508068
3:118485294|118509807	0	0	0	1.67902	1.5665	0	0	1.08184	1.08184	0.392701	0.820938	exon	ENSOCUT00000017813	ENSOCUG00000017814	ATP6V1C1	ATPase H+ transporting V1 subunit C1	---	---	---	---	---	ENSOCUT00000017813	118485294	118509807	9	118485294,118487501,118493772,118494881,118498358,118505450,118505625,118508839,118509681	118485379,118487595,118493863,118494979,118498426,118505542,118505718,118508936,118509807	853	+	118479116-118485293	118509808-118512880
3:89467282|89552638	0	0	0	0	1.5665	1.5665	0	1.04434	1.04434	0.404744	0.820938	exon	ENSOCUT00000013844	ENSOCUG00000013843	STAU2	staufen double-stranded RNA binding protein 2	---	---	---	---	---	ENSOCUT00000013844	89467282	89552638	4	89467282,89488497,89505068,89552573	89467417,89488656,89505198,89552638	493	-	89421118-89467281	89552639-89564451
14:158289941|158304579	0	0	0	0	2.29975	1.5665	0	1.28875	1.28875	0.315196	0.820938	exon	ENSOCUT00000012122	ENSOCUG00000012117	LTN1	listerin E3 ubiquitin protein ligase 1	---	---	---	---	---	ENSOCUT00000012122	158289941	158304579	7	158289941,158291323,158292007,158294090,158298373,158301237,158304393	158290154,158291467,158292142,158294232,158298477,158301396,158304579	1090	-	158289157-158289940	158304580-158305293
15:55310127|55343913	0	0	0	1.67902	2.29975	0	0	1.32626	1.32626	0.308178	0.820938	exon	ENSOCUT00000009748	ENSOCUG00000009746	PDLIM5	PDZ and LIM domain 5	---	---	---	---	---	ENSOCUT00000009748	55310127	55343913	6	55310127,55316319,55318120,55320258,55343309,55343741	55310314,55316450,55318260,55320377,55343345,55343913	791	-	55281911-55310126	55343914-55344141
2:67728759|67729226	0	0	0	0	2.29975	1.5665	0	1.28875	1.28875	0.315196	0.820938	exon	ENSOCUT00000001114	ENSOCUG00000001112	PCM1	pericentriolar material 1	---	---	---	---	---	ENSOCUT00000001114	67728759	67729226	2	67728759,67729056	67728875,67729226	288	-	67721571-67728758	67729227-67730583
7:3010619|3013954	0	0	0	0	1.5665	1.5665	0	1.04434	1.04434	0.404744	0.820938	exon	ENSOCUT00000001661	ENSOCUG00000001661	PDIA4	protein disulfide isomerase family A member 4	---	---	---	---	---	ENSOCUT00000001661	3010619	3013954	2	3010619,3013816	3010824,3013954	345	+	3009124-3010618	3013955-3015526
19:11258348|11260299	0	1.5665	1.5665	0	0	0	1.04434	0	-1.04434	0.415139	0.820938	exon	ENSOCUT00000017339	ENSOCUG00000017335	CNTROB	centrobin, centriole duplication and spindle assembly protein	---	---	---	---	---	ENSOCUT00000017339	11258348	11260299	5	11258348,11258611,11258892,11259154,11260041	11258480,11258781,11258955,11259311,11260299	785	-	11257275-11258347	11260300-11261412
18:47701730|47702602	0	0	0	2.43409	0	1.5665	0	1.33353	1.33353	0.301396	0.820938	exon	ENSOCUT00000003149	ENSOCUG00000003148	CUTC	cutC copper transporter	---	---	---	---	---	ENSOCUT00000003149	47701730	47702602	2	47701730,47702567	47701939,47702602	246	+	47695550-47701729	47702603-47705634
1:185854698|185874311	0	0	1.5665	2.43409	2.78358	0	0.522168	1.73922	1.21705	0.450505	0.820938	exon	ENSOCUT00000016119	ENSOCUG00000016117	AMBRA1	autophagy and beclin 1 regulator 1	---	---	---	---	---	ENSOCUT00000016119	185854698	185874311	3	185854698,185856277,185874132	185854798,185856357,185874311	362	-	185785396-185854697	185874312-185878722
18:51929951|51934232	0	1.5665	3.4342	0	1.5665	0	1.6669	0.522168	-1.14473	0.420985	0.820938	exon	ENSOCUT00000003039	ENSOCUG00000003035	SLK	STE20 like kinase	---	---	---	---	---	ENSOCUT00000003039	51929951	51934232	2	51929951,51934107	51930139,51934232	315	+	51929062-51929950	51934233-51936570
19:53124602|53128962	1.5665	2.29975	0	0	0	0	1.28875	0	-1.28875	0.324028	0.820938	exon	ENSOCUT00000014355	ENSOCUG00000014338	ABCA5	ATP binding cassette subfamily A member 5	---	---	---	---	---	ENSOCUT00000014355	53124602	53128962	5	53124602,53125378,53126514,53127759,53128733	53124770,53125525,53126702,53127900,53128962	878	-	53106639-53124601	53128963-53131524
9:91634886|91646588	0	0	0	1.67902	0	1.5665	0	1.08184	1.08184	0.392701	0.820938	exon	ENSOCUT00000003931,ENSOCUT00000033796	ENSOCUG00000003929	SMAD4	SMAD family member 4	---	---	---	---	---	ENSOCUT00000003931	91634886	91646588	5	91634886,91635102,91636665,91645026,91646420	91635005,91635218,91636715,91645209,91646588	641	+	91630995-91634885	91646589-91659286
9:108987941|109144211	0	0	0	1.67902	1.5665	0	0	1.08184	1.08184	0.392701	0.820938	exon	ENSOCUT00000033041	ENSOCUG00000029000	CCDC102B	coiled-coil domain containing 102B	---	---	---	---	---	ENSOCUT00000033041	108987941	109144211	3	108987941,109102093,109144108	108988150,109102263,109144211	485	+	108923820-108987940	109144212-109180267
2:142684599|142689357	0	0	0	0	1.5665	2.29975	0	1.28875	1.28875	0.315196	0.820938	exon	ENSOCUT00000001049	ENSOCUG00000001048	THADA	THADA, armadillo repeat containing	---	---	---	---	---	ENSOCUT00000001049	142684599	142689357	3	142684599,142685000,142689199	142684734,142685136,142689357	432	+	142680048-142684598	142689358-142692310
12:94656557|94668350	0	1.5665	1.5665	0	0	0	1.04434	0	-1.04434	0.415139	0.820938	exon	ENSOCUT00000013372	ENSOCUG00000013366	CRYBG1	crystallin beta-gamma domain containing 1	---	---	---	---	---	ENSOCUT00000013372	94656557	94668350	5	94656557,94662889,94663024,94664946,94668211	94658771,94662936,94663142,94665111,94668350	2688	+	94651265-94656556	94668351-94678529
19:43445222|43450912	0	3.14526	0	0	0	0	1.04842	0	-1.04842	0.334534	0.820938	exon_intron	ENSOCUT00000006046	ENSOCUG00000006045	EZH1	enhancer of zeste 1 polycomb repressive complex 2 subunit	---	---	---	---	---	ENSOCUT00000006046	43445222	43450912	4	43445222,43446825,43449203,43450137	43445342,43446944,43449331,43450912	1146	-	43441715-43445221	43450913-43463000
8:26672506|26674223	0	0	0	0	1.5665	1.5665	0	1.04434	1.04434	0.404744	0.820938	exon	ENSOCUT00000012829	ENSOCUG00000012826	FAM234B	family with sequence similarity 234 member B	---	---	---	---	---	ENSOCUT00000012829	26672506	26674223	2	26672506,26673825	26672604,26674223	498	-	26668221-26672505	26674224-26687067
13:86431308|86438852	0	0	0	0	1.5665	1.5665	0	1.04434	1.04434	0.404744	0.820938	exon	ENSOCUT00000011391	ENSOCUG00000011390	ADGRL4	adhesion G protein-coupled receptor L4	---	---	---	---	---	ENSOCUT00000011391	86431308	86438852	5	86431308,86436973,86437506,86438378,86438669	86431460,86437122,86437576,86438557,86438852	738	+	86370091-86431307	86438853-86440897
2:156954460|156969555	0	1.5665	2.29975	0	0	0	1.28875	0	-1.28875	0.324028	0.820938	exon	ENSOCUT00000001082	ENSOCUG00000001082	CLIP4	CAP-Gly domain containing linker protein family member 4	---	---	---	---	---	ENSOCUT00000001082	156954460	156969555	5	156954460,156959418,156964534,156967885,156969466	156954524,156959547,156964668,156968028,156969555	564	-	156947884-156954459	156969556-156972546
5:9675393|9684988	0	0	0	1.67902	2.29975	2.78358	0	2.25412	2.25412	0.147719	0.820938	exon	ENSOCUT00000001017	ENSOCUG00000001016	CHD9	chromodomain helicase DNA binding protein 9	---	---	---	---	---	ENSOCUT00000001017	9675393	9684988	4	9675393,9675706,9681399,9684745	9675479,9675843,9681520,9684988	591	+	9671261-9675392	9684989-9690617
15:61291737|61301001	0	0	0	1.67902	1.5665	0	0	1.08184	1.08184	0.392701	0.820938	exon	ENSOCUT00000008042	ENSOCUG00000008037	FAM13A	family with sequence similarity 13 member A	---	---	---	---	---	ENSOCUT00000008042	61291737	61301001	3	61291737,61292220,61300851	61291813,61292262,61301001	271	+	61280168-61291736	61301002-61309697
1:8173358|8174354	0	0	0	1.67902	1.5665	0	0	1.08184	1.08184	0.392701	0.820938	exon	ENSOCUT00000009288	ENSOCUG00000009279	ABCA1	ATP binding cassette subfamily A member 1	---	---	---	---	---	ENSOCUT00000009288	8173358	8174354	2	8173358,8174236	8173499,8174354	261	+	8168247-8173357	8174355-8194009
11:58190080|58194677	0	0	0	1.67902	1.5665	0	0	1.08184	1.08184	0.392701	0.820938	exon	ENSOCUT00000005902,ENSOCUT00000033590	ENSOCUG00000005888	NIPBL	NIPBL, cohesin loading factor	---	---	---	---	---	ENSOCUT00000005902	58190080	58194677	4	58190080,58191658,58193916,58194477	58190253,58191848,58194023,58194677	674	+	58187689-58190079	58194678-58199075
11:84366439|84367156	0	1.5665	0	0	3.14526	1.5665	0.522168	1.57059	1.04842	0.465489	0.820938	exon	ENSOCUT00000005120	ENSOCUG00000005116	PIK3R1	phosphoinositide-3-kinase regulatory subunit 1	---	---	---	---	---	ENSOCUT00000005120	84366439	84367156	1	84366439	84367156	718	+	---	84367157-84416227
15:79025544|79034369	0	0	0	1.67902	0	3.14526	0	1.60809	1.60809	0.241504	0.820938	exon	ENSOCUT00000001806	ENSOCUG00000001806	MOB1B	MOB kinase activator 1B	---	---	---	---	---	ENSOCUT00000001806	79025544	79034369	3	79025544,79028383,79034276	79025707,79028516,79034369	392	-	79020591-79025543	79034370-79045047
19:17226842|17228003	0	0	0	0	1.5665	2.29975	0	1.28875	1.28875	0.315196	0.820938	exon	ENSOCUT00000002217	ENSOCUG00000002214	GLOD4	glyoxalase domain containing 4	---	---	---	---	---	ENSOCUT00000002217	17226842	17228003	2	17226842,17227867	17226928,17228003	224	-	17226246-17226841	17228004-17232331
17:84950788|84951453	0	0	0	0	1.5665	1.5665	0	1.04434	1.04434	0.404744	0.820938	exon	ENSOCUT00000008732,ENSOCUT00000001007	ENSOCUG00000008730	LRRK1	leucine rich repeat kinase 1	---	---	---	---	---	ENSOCUT00000001007	84950788	84951453	2	84950788,84951274	84950933,84951453	326	-	84933273-84950787	84951454-84952176
12:32200885|32205682	0	0	0	0	1.5665	3.4342	0	1.6669	1.6669	0.228953	0.820938	exon	ENSOCUT00000017961,ENSOCUT00000030507	ENSOCUG00000017960	UBR2	ubiquitin protein ligase E3 component n-recognin 2	---	---	---	---	---	ENSOCUT00000030507	32200885	32205682	7	32200885,32201518,32201715,32202190,32204126,32204422,32205558	32200946,32201628,32201723,32202246,32204260,32204485,32205682	563	+	32196566-32200884	32205683-32206942
8:44611121|44621350	0	0	1.5665	0	1.5665	3.67482	0.522168	1.74711	1.22494	0.380346	0.820938	exon	ENSOCUT00000017090	ENSOCUG00000017086	ZMYM2	zinc finger MYM-type containing 2	---	---	---	---	---	ENSOCUT00000017090	44611121	44621350	5	44611121,44611980,44614167,44620494,44620849	44611333,44612145,44614452,44620587,44621350	1261	-	44600601-44611120	44621351-44657246
18:5994952|6000942	0	0	0	0	1.5665	2.78358	0	1.45003	1.45003	0.261483	0.820938	exon	ENSOCUT00000000524	ENSOCUG00000000525	---	---	---	---	---	---	---	ENSOCUT00000000524	5994952	6000942	2	5994952,6000849	5995010,6000942	153	+	5992016-5994951	6000943-6001434
1:133564313|133572926	1.5665	2.29975	2.29975	0	0	0	2.05533	0	-2.05533	0.182249	0.820938	exon	ENSOCUT00000004476,ENSOCUT00000033160	ENSOCUG00000004475	ANKRD42	ankyrin repeat domain 42	---	---	---	---	---	ENSOCUT00000004476	133564313	133572926	2	133564313,133572801	133564418,133572926	232	-	133559780-133564312	133572927-133578033
7:91576394|91582219	0	0	1.5665	1.67902	2.78358	2.29975	0.522168	2.25412	1.73195	0.361128	0.820938	exon	ENSOCUT00000013218	ENSOCUG00000013216	FMNL2	formin like 2	---	---	---	---	---	ENSOCUT00000013218	91576394	91582219	3	91576394,91580428,91582126	91576502,91580504,91582219	280	+	91554123-91576393	91582220-91610002
19:3890794|3897994	0	0	0	0	1.5665	1.5665	0	1.04434	1.04434	0.404744	0.820938	exon	ENSOCUT00000010472	ENSOCUG00000010460	NCOR1	nuclear receptor corepressor 1	---	---	---	---	---	ENSOCUT00000010472	3890794	3897994	5	3890794,3892344,3894825,3897307,3897938	3890884,3892516,3894891,3897359,3897994	441	-	3884743-3890793	3897995-3902900
13:52496480|52515543	2.78358	0	1.5665	0	0	0	1.45003	0	-1.45003	0.271531	0.820938	exon	ENSOCUT00000033394	ENSOCUG00000029303	RAP1A	RAP1A, member of RAS oncogene family	---	---	---	---	---	ENSOCUT00000033394	52496480	52515543	6	52496480,52501249,52504566,52507165,52511274,52515460	52496595,52501392,52504706,52507221,52511342,52515543	611	-	52492879-52496479	52515544-52585605
2:96946948|96960357	0	0	0	0	1.5665	2.29975	0	1.28875	1.28875	0.315196	0.820938	exon	ENSOCUT00000026151	ENSOCUG00000012995	MERTK	MER proto-oncogene, tyrosine kinase	---	---	---	---	---	ENSOCUT00000026151	96946948	96960357	5	96946948,96952585,96954794,96956284,96960265	96947101,96952670,96954889,96956364,96960357	510	+	96944302-96946947	96960358-96962984
20:6584146|6659515	1.5665	1.5665	0	0	0	0	1.04434	0	-1.04434	0.415139	0.820938	exon	ENSOCUT00000004666	ENSOCUG00000004667	FUT8	fucosyltransferase 8	---	---	---	---	---	ENSOCUT00000004666	6584146	6659515	3	6584146,6618800,6659418	6584575,6618891,6659515	620	-	6533378-6584145	---
17:77834224|77838315	2.29975	1.5665	0	0	0	0	1.28875	0	-1.28875	0.324028	0.820938	exon	ENSOCUT00000006773	ENSOCUG00000006754	---	---	---	---	---	---	---	ENSOCUT00000006773	77834224	77838315	2	77834224,77838215	77834443,77838315	321	+	77827939-77834223	77838316-77839053
17:29742773|29744944	0	1.5665	1.5665	0	0	0	1.04434	0	-1.04434	0.415139	0.820938	exon	ENSOCUT00000016389,ENSOCUT00000023009	ENSOCUG00000016382	ZNF106	zinc finger protein 106	---	---	---	---	---	ENSOCUT00000023009	29742773	29744944	1	29742773	29744944	2172	+	29739647-29742772	29744945-29746613
7:3127739|3196256	0	0	0	0	3.14526	0	0	1.04842	1.04842	0.327414	0.820938	exon	ENSOCUT00000001679	ENSOCUG00000001676	EZH2	enhancer of zeste 2 polycomb repressive complex 2 subunit	---	---	---	---	---	ENSOCUT00000001679	3127739	3196256	15	3127739,3155327,3156000,3170123,3176224,3177912,3179872,3180480,3187908,3189453,3192252,3192957,3194673,3195156,3196078	3127903,3155450,3156128,3170239,3176344,3178052,3179974,3180643,3187999,3189693,3192421,3193051,3194713,3195281,3196256	2008	+	---	3196257-3199718
13:64279631|64280199	0	0	0	2.43409	1.5665	1.5665	0	1.8557	1.8557	0.204737	0.820938	exon	ENSOCUT00000011894	ENSOCUG00000009465	AGL	glycogen debranching enzyme	---	---	---	---	---	ENSOCUT00000011894	64279631	64280199	3	64279631,64279879,64280075	64279765,64279991,64280199	373	-	64275656-64279630	64280200-64282808
4:74592611|74599557	0	0	0	0	1.5665	2.78358	0	1.45003	1.45003	0.261483	0.820938	exon	ENSOCUT00000008795	ENSOCUG00000008792	VEZT	vezatin, adherens junctions transmembrane protein	---	---	---	---	---	ENSOCUT00000008795	74592611	74599557	2	74592611,74599457	74592804,74599557	295	+	74589320-74592610	74599558-74603026
17:20685075|20694038	1.5665	3.14526	0	0	1.5665	0	1.57059	0.522168	-1.04842	0.468757	0.820938	exon_intron	ENSOCUT00000012985	ENSOCUG00000012987	---	---	---	---	---	---	---	ENSOCUT00000012985	20685075	20694038	1	20685075	20694038	8964	-	20677775-20685074	---
12:138545715|138551457	0	0	0	1.67902	0	1.5665	0	1.08184	1.08184	0.392701	0.820938	exon	ENSOCUT00000005913	ENSOCUG00000005905	STXBP5	syntaxin binding protein 5	---	---	---	---	---	ENSOCUT00000005913	138545715	138551457	3	138545715,138550606,138551292	138545954,138550975,138551457	776	+	138539817-138545714	138551458-138562263
19:43041762|43044222	0	2.78358	3.14526	0	0	0	1.97628	0	-1.97628	0.190079	0.820938	exon_intron	ENSOCUT00000005078	ENSOCUG00000005078	STAT5B	signal transducer and activator of transcription 5B	---	---	---	---	---	ENSOCUT00000005078	43041762	43044222	1	43041762	43044222	2461	-	43037756-43041761	43044223-43091533
9:66373106|66376458	1.5665	0	0	0	3.14526	2.78358	0.522168	1.97628	1.45411	0.374863	0.820938	exon	ENSOCUT00000005772	ENSOCUG00000005774	ZNF521	zinc finger protein 521	---	---	---	---	---	ENSOCUT00000005772	66373106	66376458	1	66373106	66376458	3353	-	66345555-66373105	66376459-66471524
9:1102661|1132685	0	0	0	1.67902	2.78358	1.5665	0	2.0097	2.0097	0.174939	0.820938	exon	ENSOCUT00000008265	ENSOCUG00000008265	SNRK	SNF related kinase	---	---	---	---	---	ENSOCUT00000008265	1102661	1132685	2	1102661,1131992	1102802,1132685	836	-	1098241-1102660	1132686-1151154
12:65830755|65833833	0	2.29975	1.5665	0	0	0	1.28875	0	-1.28875	0.324028	0.820938	exon_intron	ENSOCUT00000016415	ENSOCUG00000016401	PHIP	pleckstrin homology domain interacting protein	---	---	---	---	---	ENSOCUT00000016415	65830755	65833833	2	65830755,65833757	65830986,65833833	309	-	65830119-65830754	65833834-65836428
20:11117830|11153043	2.78358	0	2.29975	0	1.5665	0	1.69444	0.522168	-1.17227	0.465664	0.820938	exon	ENSOCUT00000003533	ENSOCUG00000003534	PPP2R5E	protein phosphatase 2 regulatory subunit Bepsilon	---	---	---	---	---	ENSOCUT00000003533	11117830	11153043	3	11117830,11123352,11152847	11117922,11123453,11153043	392	-	11093135-11117829	11153044-11248547
11:54484286|54495206	1.5665	0	3.67482	0	0	0	1.74711	0	-1.74711	0.229457	0.820938	exon	ENSOCUT00000010505	ENSOCUG00000010507	NPR3	natriuretic peptide receptor 3	---	---	---	---	---	ENSOCUT00000010505	54484286	54495206	2	54484286,54495040	54484408,54495206	290	+	54471838-54484285	54495207-54534054
14:27526800|27531808	0	1.5665	0	1.67902	1.5665	2.29975	0.522168	1.84843	1.32626	0.477845	0.820938	exon	ENSOCUT00000015754	ENSOCUG00000015750	UBA5	ubiquitin like modifier activating enzyme 5	---	---	---	---	---	ENSOCUT00000015754	27526800	27531808	5	27526800,27528730,27530084,27531407,27531681	27526909,27528816,27530168,27531511,27531808	515	+	27524129-27526799	27531809-27534334
4:77946908|77953122	0	0	0	0	2.78358	2.29975	0	1.69444	1.69444	0.22201	0.820938	exon	ENSOCUT00000011868	ENSOCUG00000011860	APAF1	apoptotic peptidase activating factor 1	---	---	---	---	---	ENSOCUT00000011868	77946908	77953122	4	77946908,77948609,77949162,77952996	77947039,77948722,77949346,77953122	558	+	77945173-77946907	77953123-77954701
14:92659143|92660655	0	0	0	0	1.5665	2.29975	0	1.28875	1.28875	0.315196	0.820938	exon	ENSOCUT00000017039	ENSOCUG00000017033	TFRC	transferrin receptor	---	---	---	---	---	ENSOCUT00000017039	92659143	92660655	3	92659143,92659730,92660451	92659201,92659931,92660655	466	+	92652791-92659142	92660656-92661978
17:20661615|20677774	0	0	0	1.67902	1.5665	0	0	1.08184	1.08184	0.392701	0.820938	exon	ENSOCUT00000012985	ENSOCUG00000012987	---	---	---	---	---	---	---	ENSOCUT00000012985	20661615	20677774	3	20661615,20662669,20677618	20661704,20662791,20677774	370	-	20658939-20661614	20677775-20685074
1:1836878|1841241	0	0	0	0	2.78358	1.5665	0	1.45003	1.45003	0.261483	0.820938	exon	ENSOCUT00000030287,ENSOCUT00000004275	ENSOCUG00000004268	ECPAS	Ecm29 proteasome adaptor and scaffold	---	---	---	---	---	ENSOCUT00000004275	1836878	1841241	3	1836878,1839497,1841092	1836994,1839615,1841241	386	+	1832165-1836877	1841242-1846303
9:91630782|91646588	1.5665	1.5665	0	0	0	0	1.04434	0	-1.04434	0.415139	0.820938	exon	ENSOCUT00000003931,ENSOCUT00000033796	ENSOCUG00000003929	SMAD4	SMAD family member 4	---	---	---	---	---	ENSOCUT00000003931	91630782	91646588	6	91630782,91634886,91635102,91636665,91645026,91646420	91630994,91635005,91635218,91636715,91645209,91646588	854	+	91626314-91630781	91646589-91659286
3:12503709|12550453	0	1.5665	1.5665	0	0	0	1.04434	0	-1.04434	0.415139	0.820938	exon	ENSOCUT00000017140	ENSOCUG00000017136	SLC27A6	solute carrier family 27 member 6	---	---	---	---	---	ENSOCUT00000017140	12503709	12550453	4	12503709,12519263,12521068,12550259	12503912,12519421,12521192,12550453	683	+	12488333-12503708	12550454-12559499
14:36146241|36186286	0	0	0	1.67902	0	1.5665	0	1.08184	1.08184	0.392701	0.820938	exon	ENSOCUT00000017709	ENSOCUG00000017709	TRPC1	short transient receptor potential channel 1	---	---	---	---	---	ENSOCUT00000017709	36146241	36186286	6	36146241,36168766,36171555,36176144,36184344,36186143	36146443,36168897,36171750,36176480,36184483,36186286	1152	+	36142213-36146240	36186287-36207320
4:50679726|50682306	0	0	0	0	0	3.14526	0	1.04842	1.04842	0.327414	0.820938	exon	ENSOCUT00000021175	ENSOCUG00000004591	ZFC3H1	zinc finger C3H1-type containing	---	---	---	---	---	ENSOCUT00000021175	50679726	50682306	4	50679726,50679919,50681355,50682132	50679835,50680461,50681486,50682306	960	-	50678653-50679725	50682307-50683146
14:97355804|97357218	0	0	0	0	1.5665	1.5665	0	1.04434	1.04434	0.404744	0.820938	exon	ENSOCUT00000012445	ENSOCUG00000012449	HCLS1	hematopoietic cell-specific Lyn substrate 1	---	---	---	---	---	ENSOCUT00000012445	97355804	97357218	3	97355804,97356481,97357149	97355914,97356536,97357218	237	+	97350489-97355803	97357219-97358489
13:72140551|72158996	0	0	0	1.67902	1.5665	0	0	1.08184	1.08184	0.392701	0.820938	exon	ENSOCUT00000001805	ENSOCUG00000001804	RPAP2	RNA polymerase II associated protein 2	---	---	---	---	---	ENSOCUT00000001805	72140551	72158996	4	72140551,72144110,72157904,72158931	72141469,72144145,72157992,72158996	1110	-	72136720-72140550	72158997-72159627
4:4846630|4874631	1.5665	0	2.29975	0	0	0	1.28875	0	-1.28875	0.324028	0.820938	exon	ENSOCUT00000002263	ENSOCUG00000002260	ACSS2	acyl-CoA synthetase short chain family member 2	---	---	---	---	---	ENSOCUT00000002263	4846630	4874631	4	4846630,4846960,4847241,4874436	4846702,4847063,4847332,4874631	465	-	4846017-4846629	4874632-4879892
9:110200106|110215995	0	0	0	0	2.29975	1.5665	0	1.28875	1.28875	0.315196	0.820938	exon	ENSOCUT00000001389	ENSOCUG00000001384	RTTN	rotatin	---	---	---	---	---	ENSOCUT00000001389	110200106	110215995	3	110200106,110203594,110215904	110200298,110203687,110215995	379	-	110196669-110200105	110215996-110221784
16:32996058|33014341	0	0	0	1.67902	2.29975	0	0	1.32626	1.32626	0.308178	0.820938	exon	ENSOCUT00000006604	ENSOCUG00000006605	ARID4B	AT-rich interaction domain 4B	---	---	---	---	---	ENSOCUT00000006604	32996058	33014341	4	32996058,32997721,33003045,33014250	32996123,32997811,33003124,33014341	329	+	32992696-32996057	33014342-33023755
15:39938910|39942482	0	0	0	3.29403	1.5665	1.5665	0	2.14234	2.14234	0.144597	0.820938	exon	ENSOCUT00000001287	ENSOCUG00000001284	SEC24B	SEC24 homolog B, COPII coat complex component	---	---	---	---	---	ENSOCUT00000001287	39938910	39942482	5	39938910,39939318,39939621,39941799,39942324	39939028,39939373,39939827,39941922,39942482	665	+	39934431-39938909	39942483-39945557
17:54516170|54541733	2.29975	1.5665	0	0	0	0	1.28875	0	-1.28875	0.324028	0.820938	exon	ENSOCUT00000012607	ENSOCUG00000012593	BAZ1A	bromodomain adjacent to zinc finger domain 1A	---	---	---	---	---	ENSOCUT00000012607	54516170	54541733	16	54516170,54516813,54517095,54517225,54517598,54518148,54518337,54529655,54530857,54532398,54534415,54537954,54540253,54540604,54541295,54541638	54516671,54516848,54517103,54517250,54517629,54518239,54518584,54529803,54531011,54532561,54535017,54538078,54540366,54540769,54541525,54541733	2748	-	54514542-54516169	54541734-54545662
7:72410012|72434085	1.5665	1.5665	0	0	0	0	1.04434	0	-1.04434	0.415139	0.820938	exon	ENSOCUT00000002024	ENSOCUG00000002022	RAB3GAP1	RAB3 GTPase activating protein catalytic subunit 1	---	---	---	---	---	ENSOCUT00000002024	72410012	72434085	8	72410012,72411659,72412200,72416760,72417894,72420305,72420594,72433948	72410085,72411751,72412369,72416849,72418066,72420359,72420965,72434085	1165	+	72407797-72410011	72434086-72439072
16:49018400|49032787	2.29975	0	2.78358	0	0	0	1.69444	0	-1.69444	0.229082	0.820938	exon	ENSOCUT00000005533	ENSOCUG00000005530	NVL	nuclear VCP-like	---	---	---	---	---	ENSOCUT00000005533	49018400	49032787	5	49018400,49020506,49027733,49028763,49032553	49018534,49020607,49027850,49028907,49032787	735	+	49016914-49018399	49032788-49035708
12:76603819|76614379	2.29975	0	1.5665	0	0	0	1.28875	0	-1.28875	0.324028	0.820938	exon	ENSOCUT00000004573	ENSOCUG00000004534	MDN1	midasin AAA ATPase 1	---	---	---	---	---	ENSOCUT00000004573	76603819	76614379	5	76603819,76605257,76607162,76610927,76614298	76603879,76605405,76607274,76611022,76614379	501	-	76594648-76603818	76614380-76615297
2:128030061|128050007	0	0	0	1.67902	0	1.5665	0	1.08184	1.08184	0.392701	0.820938	exon	ENSOCUT00000007388	ENSOCUG00000007388	VRK2	vaccinia related kinase 2	---	---	---	---	---	ENSOCUT00000007388	128030061	128050007	4	128030061,128035271,128038379,128049875	128030227,128035329,128038499,128050007	480	-	128024413-128030060	128050008-128068783
10:41007446|41007778	0	1.5665	0	1.67902	2.29975	1.5665	0.522168	1.84843	1.32626	0.477845	0.820938	exon	ENSOCUT00000010546	ENSOCUG00000010544	CROT	carnitine O-octanoyltransferase	---	---	---	---	---	ENSOCUT00000010546	41007446	41007778	2	41007446,41007685	41007571,41007778	220	-	41005502-41007445	41007779-41014394
2:112969038|112984900	0	2.29975	2.78358	0	0	0	1.69444	0	-1.69444	0.229082	0.820938	exon	ENSOCUT00000006237	ENSOCUG00000006224	ALMS1	ALMS1, centrosome and basal body associated protein	---	---	---	---	---	ENSOCUT00000006237	112969038	112984900	3	112969038,112977969,112984778	112969155,112978170,112984900	443	-	112965848-112969037	112984901-113004570
3:107596302|107607743	0	0	0	0	2.29975	2.78358	0	1.69444	1.69444	0.22201	0.820938	exon	ENSOCUT00000003755	ENSOCUG00000003754	RUNX1T1	RUNX1 translocation partner 1	---	---	---	---	---	ENSOCUT00000003755	107596302	107607743	4	107596302,107602187,107605367,107607606	107596483,107602276,107605608,107607743	652	-	107583737-107596301	107607744-107696862
4:41451636|41473326	0	1.5665	1.5665	0	0	0	1.04434	0	-1.04434	0.415139	0.820938	exon	ENSOCUT00000023821	ENSOCUG00000002406	MON2	MON2 homolog, regulator of endosome-to-Golgi trafficking	---	---	---	---	---	ENSOCUT00000023821	41451636	41473326	6	41451636,41462056,41463158,41469556,41472412,41473201	41451699,41462183,41463289,41469685,41472509,41473326	678	+	41434315-41451635	41473327-41476895
17:452924|455992	1.5665	0	0	1.67902	2.29975	1.5665	0.522168	1.84843	1.32626	0.477845	0.820938	intergenic region	n/a	n/a	---	---	---	---	---	---	---	17:452924|455992	452924	455992	1	452924	455992	3069	+	---	---
11:72741058|72748462	1.5665	2.29975	2.78358	0	0	0	2.21661	0	-2.21661	0.155931	0.820938	exon	ENSOCUT00000009160	ENSOCUG00000009155	MAP3K1	mitogen-activated protein kinase kinase kinase 1	---	---	---	---	---	ENSOCUT00000009160	72741058	72748462	3	72741058,72743518,72748262	72741208,72743718,72748462	553	+	72714057-72741057	72748463-72749624
14:91659318|91709430	1.5665	1.5665	0	0	0	0	1.04434	0	-1.04434	0.415139	0.820938	exon	ENSOCUT00000010317	ENSOCUG00000010313	DLG1	discs large MAGUK scaffold protein 1	---	---	---	---	---	ENSOCUT00000010317	91659318	91709430	9	91659318,91668756,91676142,91680460,91683861,91686068,91692207,91698226,91709274	91659416,91668809,91676192,91680584,91684030,91686204,91692351,91698346,91709430	1059	+	91625180-91659317	91709431-91719832
4:91201790|91206109	0	0	0	0	2.78358	1.5665	0	1.45003	1.45003	0.261483	0.820938	exon	ENSOCUT00000005033	ENSOCUG00000005030	WASHC4	WASH complex subunit 4	---	---	---	---	---	ENSOCUT00000005033	91201790	91206109	4	91201790,91203552,91205662,91206035	91201898,91203686,91205766,91206109	424	-	91196223-91201789	91206110-91206127
13:51570871|51577158	1.5665	0	1.5665	0	0	0	1.04434	0	-1.04434	0.415139	0.820938	exon	ENSOCUT00000000267	ENSOCUG00000000269	ST7L	suppression of tumorigenicity 7 like	---	---	---	---	---	ENSOCUT00000000267	51570871	51577158	2	51570871,51577004	51570949,51577158	234	+	51561089-51570870	51577159-51579134
13:114402915|114420159	1.5665	0	1.5665	0	0	0	1.04434	0	-1.04434	0.415139	0.820938	exon	ENSOCUT00000000957	ENSOCUG00000000956	ZFYVE9	zinc finger FYVE-type containing 9	---	---	---	---	---	ENSOCUT00000000957	114402915	114420159	4	114402915,114411898,114416061,114419935	114403065,114412002,114416143,114420159	564	-	114397028-114402914	114420160-114441576
13:3193977|3226819	0	1.5665	1.5665	0	0	0	1.04434	0	-1.04434	0.415139	0.820938	exon	ENSOCUT00000005468	ENSOCUG00000005463	COP1	COP1, E3 ubiquitin ligase	---	---	---	---	---	ENSOCUT00000005468	3193977	3226819	4	3193977,3198433,3213240,3226743	3194112,3198547,3213297,3226819	386	-	3166738-3193976	3226820-3228210
10:45710056|45711207	2.78358	2.78358	1.5665	0	0	1.5665	2.37789	0.522168	-1.85572	0.329297	0.820938	exon	ENSOCUT00000010492	ENSOCUG00000010481	EGFR	epidermal growth factor receptor	---	---	---	---	---	ENSOCUT00000010492	45710056	45711207	2	45710056,45711056	45710239,45711207	336	-	45708427-45710055	45711208-45803275
4:79384403|79395740	0	0	0	1.67902	1.5665	0	0	1.08184	1.08184	0.392701	0.820938	exon	ENSOCUT00000017138	ENSOCUG00000017132	UHRF1BP1L	UHRF1 binding protein 1 like	---	---	---	---	---	ENSOCUT00000017138	79384403	79395740	4	79384403,79390718,79391542,79395649	79384573,79390858,79391731,79395740	594	-	79377596-79384402	79395741-79405614
8:27540582|27560097	0	0	0	0	1.5665	1.5665	0	1.04434	1.04434	0.404744	0.820938	exon	ENSOCUT00000003007	ENSOCUG00000003006	LRP6	LDL receptor related protein 6	---	---	---	---	---	ENSOCUT00000003007	27540582	27560097	5	27540582,27553304,27555056,27558469,27559926	27540779,27553500,27555187,27558865,27560097	1096	+	27484280-27540581	27560098-27579244
X:67347499|67374186	1.5665	0	2.29975	0	0	0	1.28875	0	-1.28875	0.324028	0.820938	exon	ENSOCUT00000013672	ENSOCUG00000013642	DOCK11	dedicator of cytokinesis 11	---	---	---	---	---	ENSOCUT00000013672	67347499	67374186	7	67347499,67350650,67354172,67358391,67358694,67365725,67374064	67347636,67350832,67354285,67358606,67358751,67365831,67374186	939	+	67345579-67347498	67374187-67379068
9:59310539|59327358	1.5665	1.5665	1.5665	0	0	0	1.5665	0	-1.5665	0.276971	0.820938	exon	ENSOCUT00000016079	ENSOCUG00000000020	SMCHD1	structural maintenance of chromosomes flexible hinge domain containing 1	---	---	---	---	---	ENSOCUT00000016079	59310539	59327358	10	59310539,59312557,59312757,59318580,59318866,59320424,59321548,59323168,59326980,59327238	59310683,59312676,59312834,59318693,59318948,59320530,59321661,59323362,59327163,59327358	1261	-	59303267-59310538	59327359-59331180
17:51843266|51847153	0	1.5665	2.29975	0	0	0	1.28875	0	-1.28875	0.324028	0.820938	exon	ENSOCUT00000032120	ENSOCUG00000010548	ARHGAP5	Rho GTPase activating protein 5	---	---	---	---	---	ENSOCUT00000032120	51843266	51847153	1	51843266	51847153	3888	+	---	51847154-51877932
13:23507738|23510299	0	0	0	1.67902	0	2.78358	0	1.48753	1.48753	0.257503	0.820938	exon	ENSOCUT00000022793	ENSOCUG00000002788	FMO1	dimethylaniline monooxygenase	---	---	---	---	---	ENSOCUT00000022793	23507738	23510299	2	23507738,23510100	23507880,23510299	343	+	23505072-23507737	23510300-23513163
7:63083448|63099840	0	0	0	0	3.14526	0	0	1.04842	1.04842	0.327414	0.820938	exon	ENSOCUT00000008372	ENSOCUG00000008364	PTPN4	protein tyrosine phosphatase, non-receptor type 4	---	---	---	---	---	ENSOCUT00000008372	63083448	63099840	4	63083448,63089864,63095796,63099777	63083573,63089932,63095968,63099840	432	-	63082977-63083447	63099841-63110373
20:31816589|31833705	1.5665	2.78358	2.78358	0	1.5665	1.5665	2.37789	1.04434	-1.33355	0.48476	0.820938	exon	ENSOCUT00000014544	ENSOCUG00000014545	PSEN1	presenilin 1	---	---	---	---	---	ENSOCUT00000014544	31816589	31833705	4	31816589,31820595,31830900,31833485	31816765,31820681,31830998,31833705	584	-	31810627-31816588	31833706-31843057
15:61370740|61382323	0	0	0	1.67902	1.5665	2.29975	0	1.84843	1.84843	0.208882	0.820938	exon	ENSOCUT00000008017	ENSOCUG00000008013	HERC3	HECT and RLD domain containing E3 ubiquitin protein ligase 3	---	---	---	---	---	ENSOCUT00000008017	61370740	61382323	7	61370740,61371309,61376081,61378513,61380465,61382117,61382300	61370822,61371375,61376247,61378656,61380635,61382206,61382323	746	-	61349676-61370739	61382324-61389779
14:143838365|143850392	0	1.5665	1.5665	0	0	0	1.04434	0	-1.04434	0.415139	0.820938	exon	ENSOCUT00000004744	ENSOCUG00000004742	USP25	ubiquitin specific peptidase 25	---	---	---	---	---	ENSOCUT00000004744	143838365	143850392	5	143838365,143840837,143844605,143848705,143850197	143838543,143840915,143844684,143848828,143850392	658	+	143825823-143838364	143850393-143850712
1:15558115|15569031	1.5665	2.29975	0	0	0	0	1.28875	0	-1.28875	0.324028	0.820938	exon	ENSOCUT00000000059	ENSOCUG00000000060	TDRD7	tudor domain containing 7	---	---	---	---	---	ENSOCUT00000000059	15558115	15569031	5	15558115,15560989,15564736,15566372,15568829	15558225,15561123,15564822,15566506,15569031	671	-	15555652-15558114	15569032-15570853
7:150920306|150953283	4.497	0	0	0	6.20141	6.12236	1.499	4.10793	2.60893	0.441248	0.820938	exon	ENSOCUT00000017007	ENSOCUG00000017001	KANSL1L	KAT8 regulatory NSL complex subunit 1 like	---	---	---	---	---	ENSOCUT00000017007	150920306	150953283	2	150920306,150953142	150920503,150953283	340	-	150914639-150920305	150953284-150981633
2:142532774|142538891	1.5665	2.29975	2.29975	0	1.5665	0	2.05533	0.522168	-1.53317	0.420727	0.820938	exon	ENSOCUT00000027657	ENSOCUG00000024266	PLEKHH2	pleckstrin homology, MyTH4 and FERM domain containing H2	---	---	---	---	---	ENSOCUT00000027657	142532774	142538891	3	142532774,142534562,142538712	142532886,142534670,142538891	402	-	142528944-142532773	142538892-142546033
14:155192035|155226720	1.5665	0	1.5665	0	0	0	1.04434	0	-1.04434	0.415139	0.820938	exon	ENSOCUT00000010591	ENSOCUG00000010587	APP	amyloid beta precursor protein	---	---	---	---	---	ENSOCUT00000010591	155192035	155226720	3	155192035,155224879,155226608	155192234,155225072,155226720	507	-	155173618-155192034	155226721-155254933
13:44022738|44040308	0	0	0	1.67902	1.5665	0	0	1.08184	1.08184	0.392701	0.820938	exon	ENSOCUT00000026604	ENSOCUG00000016565	---	---	---	---	---	---	---	ENSOCUT00000026604	44022738	44040308	11	44022738,44023129,44024060,44026523,44027938,44030983,44035631,44037127,44037705,44039124,44040080	44022948,44023271,44024407,44027028,44028050,44031219,44035763,44037311,44037858,44039325,44040308	2461	-	44021951-44022737	44040309-44049266
19:20943745|20946117	0	0	0	0	1.5665	2.29975	0	1.28875	1.28875	0.315196	0.820938	exon	ENSOCUT00000008588	ENSOCUG00000008567	NF1	neurofibromin 1	---	---	---	---	---	ENSOCUT00000008588	20943745	20946117	2	20943745,20945991	20943885,20946117	268	+	20941747-20943744	20946118-20948918
17:29216257|29217464	1.5665	0	1.5665	0	0	0	1.04434	0	-1.04434	0.415139	0.820938	exon	ENSOCUT00000023658,ENSOCUT00000012349	ENSOCUG00000012331	UBR1	ubiquitin protein ligase E3 component n-recognin 1	---	---	---	---	---	ENSOCUT00000012349	29216257	29217464	3	29216257,29217068,29217363	29216367,29217133,29217464	279	+	29215647-29216256	29217465-29219876
3:31093802|31098364	2.78358	1.5665	0	0	0	0	1.45003	0	-1.45003	0.271531	0.820938	exon	ENSOCUT00000016106	ENSOCUG00000016093	ABLIM3	actin binding LIM protein family member 3	---	---	---	---	---	ENSOCUT00000016106	31093802	31098364	5	31093802,31095012,31096270,31097748,31098306	31093936,31095076,31096417,31097777,31098364	437	+	31090827-31093801	31098365-31099833
4:3936558|3939083	2.29975	1.5665	0	0	0	0	1.28875	0	-1.28875	0.324028	0.820938	exon	ENSOCUT00000007057	ENSOCUG00000007059	PHF20	PHD finger protein 20	---	---	---	---	---	ENSOCUT00000007057	3936558	3939083	2	3936558,3938690	3936741,3939083	578	-	3931691-3936557	3939084-3944292
10:36561790|36573899	3.14526	1.5665	2.29975	3.29403	3.88098	4.22163	2.33717	3.79888	1.46171	0.49296	0.820938	exon	ENSOCUT00000004569	ENSOCUG00000004570	KRIT1	KRIT1, ankyrin repeat containing	---	---	---	---	---	ENSOCUT00000004569	36561790	36573899	5	36561790,36568271,36569665,36572875,36573748	36561933,36568427,36569772,36573031,36573899	718	+	36560926-36561789	36573900-36578009
4:3058227|3104887	1.5665	1.5665	0	0	0	0	1.04434	0	-1.04434	0.415139	0.820938	exon	ENSOCUT00000026391,ENSOCUT00000005812	ENSOCUG00000005804	RBL1	RB transcriptional corepressor like 1	---	---	---	---	---	ENSOCUT00000026391	3058227	3104887	16	3058227,3059953,3060270,3063707,3069778,3075095,3077663,3079986,3088284,3091555,3093869,3102678,3103389,3103971,3104338,3104736	3058393,3060065,3060373,3063844,3069980,3075165,3077929,3080197,3088460,3091626,3093893,3102699,3103444,3104005,3104365,3104887	1842	+	3057157-3058226	3104888-3111751
5:14437326|14451744	2.29975	1.5665	1.5665	0	0	0	1.81092	0	-1.81092	0.22087	0.820938	exon	ENSOCUT00000006918	ENSOCUG00000006911	CNOT1	CCR4-NOT transcription complex subunit 1	---	---	---	---	---	ENSOCUT00000006918	14437326	14451744	12	14437326,14437659,14438476,14441837,14443997,14444507,14445338,14445565,14448964,14450346,14451532,14451676	14437477,14437781,14438595,14442077,14444124,14444677,14445448,14445691,14449132,14450549,14451586,14451744	1670	-	14433730-14437325	14451745-14452333
14:143741413|143783435	1.5665	2.29975	0	0	0	0	1.28875	0	-1.28875	0.324028	0.820938	exon	ENSOCUT00000004744	ENSOCUG00000004742	USP25	ubiquitin specific peptidase 25	---	---	---	---	---	ENSOCUT00000004744	143741413	143783435	7	143741413,143752427,143757240,143770688,143774498,143778239,143783287	143741536,143752589,143757326,143770825,143774574,143778312,143783435	812	+	143730447-143741412	143783436-143794475
11:55335561|55344612	0	1.5665	1.5665	0	0	0	1.04434	0	-1.04434	0.415139	0.820938	exon	ENSOCUT00000006358	ENSOCUG00000006357	ADAMTS12	ADAM metallopeptidase with thrombospondin type 1 motif 12	---	---	---	---	---	ENSOCUT00000006358	55335561	55344612	3	55335561,55342539,55344368	55335687,55342677,55344612	511	-	55323817-55335560	55344613-55349399
4:2253962|2264016	1.5665	0	1.5665	0	0	0	1.04434	0	-1.04434	0.415139	0.820938	exon	ENSOCUT00000003449	ENSOCUG00000003450	RPRD1B	regulation of nuclear pre-mRNA domain containing 1B	---	---	---	---	---	ENSOCUT00000003449	2253962	2264016	3	2253962,2260750,2263904	2254137,2260876,2264016	416	-	2233490-2253961	2264017-2274063
7:143954502|143956514	0	0	1.5665	1.67902	2.29975	3.14526	0.522168	2.37468	1.85251	0.323037	0.820938	exon	ENSOCUT00000008053	ENSOCUG00000008054	CYP20A1	cytochrome P450 family 20 subfamily A member 1	---	---	---	---	---	ENSOCUT00000008053	143954502	143956514	2	143954502,143956450	143954613,143956514	177	+	143943172-143954501	143956515-143960233
12:127467337|127469654	0	0	0	0	1.5665	1.5665	0	1.04434	1.04434	0.404744	0.820938	exon	ENSOCUT00000015693	ENSOCUG00000015696	IL20RA	interleukin 20 receptor subunit alpha	---	---	---	---	---	ENSOCUT00000015693	127467337	127469654	3	127467337,127468027,127469476	127467481,127468202,127469654	500	-	127462968-127467336	127469655-127476004
13:141309139|141410656	1.5665	0	2.29975	0	0	0	1.28875	0	-1.28875	0.324028	0.820938	exon_intron	ENSOCUT00000014870	ENSOCUG00000014859	RERE	arginine-glutamic acid dipeptide repeats	---	---	---	---	---	ENSOCUT00000014870	141309139	141410656	6	141309139,141337126,141345435,141392232,141395280,141410552	141309604,141337196,141345560,141392337,141395376,141410656	971	+	---	141410657-141448657
4:79067238|79098187	2.78358	2.29975	0	0	0	1.5665	1.69444	0.522168	-1.17227	0.465664	0.820938	exon	ENSOCUT00000033952	ENSOCUG00000029510	ANKS1B	ankyrin repeat and sterile alpha motif domain containing 1B	---	---	---	---	---	ENSOCUT00000033952	79067238	79098187	6	79067238,79070158,79074204,79076219,79090416,79098031	79067404,79070271,79074305,79076294,79090712,79098187	913	-	78955145-79067237	79098188-79113408
3:28106167|28119503	0	0	0	0	3.4342	1.5665	0	1.6669	1.6669	0.228953	0.820938	exon	ENSOCUT00000015708	ENSOCUG00000015684	LARS	leucyl-tRNA synthetase	---	---	---	---	---	ENSOCUT00000015708	28106167	28119503	10	28106167,28107415,28108267,28108446,28108597,28113984,28116116,28117999,28119256,28119416	28106379,28107553,28108349,28108511,28108682,28114061,28116256,28118052,28119332,28119503	1025	-	28104350-28106166	28119504-28122482
12:45441179|45444296	3.14526	0	0	0	0	0	1.04842	0	-1.04842	0.334534	0.820938	exon	ENSOCUT00000034169	ENSOCUG00000029661	HMGCLL1	3-hydroxymethyl-3-methylglutaryl-CoA lyase like 1	---	---	---	---	---	ENSOCUT00000034169	45441179	45444296	2	45441179,45444233	45441367,45444296	253	-	45384105-45441178	45444297-45463918
16:20710764|20724691	0	2.78358	1.5665	0	0	0	1.45003	0	-1.45003	0.271531	0.820938	exon	ENSOCUT00000014516	ENSOCUG00000014500	AHCTF1	AT-hook containing transcription factor 1	---	---	---	---	---	ENSOCUT00000014516	20710764	20724691	5	20710764,20713084,20718773,20723215,20724575	20710891,20713337,20718953,20723422,20724691	888	+	20701636-20710763	20724692-20729213
12:61998719|61999155	0	0	0	0	0	3.14526	0	1.04842	1.04842	0.327414	0.820938	exon	ENSOCUT00000015357	ENSOCUG00000015320	COL12A1	collagen type XII alpha 1 chain	---	---	---	---	---	ENSOCUT00000015357	61998719	61999155	2	61998719,61999032	61998862,61999155	268	-	61996614-61998718	61999156-62001480
7:12532108|12535644	1.5665	0	2.29975	0	0	0	1.28875	0	-1.28875	0.324028	0.820938	exon	ENSOCUT00000011683	ENSOCUG00000011678	EXOC4	exocyst complex component 4	---	---	---	---	---	ENSOCUT00000011683	12532108	12535644	2	12532108,12535485	12532286,12535644	339	+	12522358-12532107	12535645-12597540
14:75030156|75030437	2.29975	2.78358	0	0	0	0	1.69444	0	-1.69444	0.229082	0.820938	exon	ENSOCUT00000017883	ENSOCUG00000017883	ACTL6A	actin like 6A	---	---	---	---	---	ENSOCUT00000017883	75030156	75030437	2	75030156,75030348	75030262,75030437	197	+	75029543-75030155	75030438-75033158
11:18339664|18348693	0	0	0	0	1.5665	1.5665	0	1.04434	1.04434	0.404744	0.820938	exon	ENSOCUT00000004441	ENSOCUG00000004434	CHD1	chromodomain helicase DNA binding protein 1	---	---	---	---	---	ENSOCUT00000004441	18339664	18348693	7	18339664,18344244,18345489,18346703,18347798,18348118,18348563	18339842,18344384,18345617,18346822,18347948,18348256,18348693	990	-	18335306-18339663	18348694-18350199
7:71535476|71535855	0	1.5665	2.29975	0	0	0	1.28875	0	-1.28875	0.324028	0.820938	exon	ENSOCUT00000011098	ENSOCUG00000011096	MGAT5	mannosyl (alpha-1,6-)-glycoprotein beta-1,6-N-acetyl-glucosaminyltransferase	---	---	---	---	---	ENSOCUT00000011098	71535476	71535855	1	71535476	71535855	380	+	---	71535856-71552783
9:12254091|12254611	0	0	0	2.9272	2.78358	1.5665	0	2.42576	2.42576	0.1253	0.820938	exon_intron	ENSOCUT00000001910,ENSOCUT00000033363	ENSOCUG00000001911	VGLL4	vestigial like family member 4	---	---	---	---	---	ENSOCUT00000001910	12254091	12254611	1	12254091	12254611	521	+	12220015-12254090	12254612-12289649
3:83897032|83908123	0	0	0	0	0	3.4342	0	1.14473	1.14473	0.287889	0.820938	exon	ENSOCUT00000001785	ENSOCUG00000001781	PREX2	phosphatidylinositol-3,4,5-trisphosphate dependent Rac exchange factor 2	---	---	---	---	---	ENSOCUT00000001785	83897032	83908123	5	83897032,83898422,83901179,83904078,83907962	83897103,83898544,83901283,83904179,83908123	564	+	83824916-83897031	83908124-83912665
20:30316828|30318944	0	0	0	0	1.5665	1.5665	0	1.04434	1.04434	0.404744	0.820938	intron	ENSOCUT00000008086	ENSOCUG00000008083	YLPM1	YLP motif containing 1	---	---	---	---	---	ENSOCUT00000008086	30316828	30318944	1	30316828	30318944	2117	-	30314297-30316827	30318945-30336858
7:76396193|76401391	0	0	0	1.67902	3.14526	2.29975	0	2.37468	2.37468	0.129398	0.820938	exon_intron	ENSOCUT00000006942	ENSOCUG00000006944	SPOPL	speckle type BTB/POZ protein like	---	---	---	---	---	ENSOCUT00000006942	76396193	76401391	4	76396193,76396517,76396898,76398681	76396328,76396638,76397049,76401391	3121	+	---	76401392-76410420
17:7779842|7800935	0	0	0	0	1.5665	1.5665	0	1.04434	1.04434	0.404744	0.820938	exon	ENSOCUT00000002321	ENSOCUG00000002322	TRIP4	thyroid hormone receptor interactor 4	---	---	---	---	---	ENSOCUT00000002321	7779842	7800935	4	7779842,7795129,7796938,7800748	7779944,7795220,7797062,7800935	508	-	7770416-7779841	7800936-7807622
9:64254251|64267970	0	0	0	0	3.14526	0	0	1.04842	1.04842	0.327414	0.820938	exon	ENSOCUT00000007334	ENSOCUG00000007333	RBBP8	RB binding protein 8, endonuclease	---	---	---	---	---	ENSOCUT00000007334	64254251	64267970	3	64254251,64255903,64267873	64254435,64256004,64267970	385	+	64247517-64254250	64267971-64270727
X:59544298|59608833	0	1.5665	1.5665	0	0	0	1.04434	0	-1.04434	0.415139	0.820938	exon	ENSOCUT00000023921	ENSOCUG00000007033	PAK3	p21 (RAC1) activated kinase 3	---	---	---	---	---	ENSOCUT00000023921	59544298	59608833	13	59544298,59548668,59549863,59552031,59559803,59560442,59570058,59586171,59586530,59589756,59591329,59591931,59608696	59544398,59548712,59550016,59552068,59559934,59560607,59570121,59586219,59586642,59589873,59591428,59592127,59608833	1415	+	59526511-59544297	59608834-59613256
20:24425614|24493004	0	1.5665	2.78358	0	0	0	1.45003	0	-1.45003	0.271531	0.820938	exon	ENSOCUT00000004028	ENSOCUG00000004026	CEP128	centrosomal protein 128	---	---	---	---	---	ENSOCUT00000004028	24425614	24493004	7	24425614,24429415,24447914,24481854,24486635,24488287,24492853	24425705,24429487,24448030,24481940,24486709,24488419,24493004	729	+	24422567-24425613	24493005-24540071
18:18276516|18284033	2.78358	1.5665	0	0	0	0	1.45003	0	-1.45003	0.271531	0.820938	exon	ENSOCUT00000004447	ENSOCUG00000004449	RUFY2	RUN and FYVE domain containing 2	---	---	---	---	---	ENSOCUT00000004447	18276516	18284033	6	18276516,18278081,18278306,18278890,18281409,18283914	18276585,18278182,18278422,18279057,18281506,18284033	675	+	18274106-18276515	18284034-18295573
12:1329807|1333200	0	0	0	1.67902	3.14526	0	0	1.60809	1.60809	0.241504	0.820938	exon	ENSOCUT00000005165	ENSOCUG00000005168	SNRNP48	small nuclear ribonucleoprotein U11/U12 subunit 48	---	---	---	---	---	ENSOCUT00000005165	1329807	1333200	2	1329807,1333112	1329928,1333200	211	+	1329058-1329806	1333201-1333813
4:26829058|26840602	0	0	0	1.67902	0	1.5665	0	1.08184	1.08184	0.392701	0.820938	exon	ENSOCUT00000010762	ENSOCUG00000010755	PLCB4	phospholipase C beta 4	---	---	---	---	---	ENSOCUT00000010762	26829058	26840602	4	26829058,26829930,26837238,26840523	26829158,26830011,26837291,26840602	317	-	26828419-26829057	26840603-26861264
8:11993936|12040210	2.29975	1.5665	1.5665	0	0	0	1.81092	0	-1.81092	0.22087	0.820938	exon	ENSOCUT00000034057	ENSOCUG00000029161	CCDC91	coiled-coil domain containing 91	---	---	---	---	---	ENSOCUT00000034057	11993936	12040210	5	11993936,11996426,11997871,12037330,12040167	11994040,11996629,11998001,12037408,12040210	563	-	11937051-11993935	---
4:1464746|1466789	0	0	0	1.67902	2.78358	0	0	1.48753	1.48753	0.257503	0.820938	exon	ENSOCUT00000009421	ENSOCUG00000009416	DHX35	DEAH-box helicase 35	---	---	---	---	---	ENSOCUT00000009421	1464746	1466789	2	1464746,1466718	1464857,1466789	184	-	1457392-1464745	1466790-1469331
X:2549398|2553785	0	0	0	3.58623	1.5665	2.29975	0	2.48416	2.48416	0.110182	0.820938	exon	ENSOCUT00000002738	ENSOCUG00000002738	CTPS2	CTP synthase 2	---	---	---	---	---	ENSOCUT00000002738	2549398	2553785	4	2549398,2549546,2552288,2553697	2549441,2549608,2552382,2553785	291	-	2510289-2549397	2553786-2557487
4:7450814|7451546	0	1.5665	1.5665	0	0	0	1.04434	0	-1.04434	0.415139	0.820938	exon	ENSOCUT00000003205	ENSOCUG00000003203	TPX2	TPX2, microtubule nucleation factor	---	---	---	---	---	ENSOCUT00000003205	7450814	7451546	1	7450814	7451546	733	-	---	7451547-7453776
12:99068165|99090404	0	0	0	0	2.29975	1.5665	0	1.28875	1.28875	0.315196	0.820938	exon	ENSOCUT00000017057	ENSOCUG00000017034	REV3L	REV3 like, DNA directed polymerase zeta catalytic subunit	---	---	---	---	---	ENSOCUT00000017057	99068165	99090404	6	99068165,99076877,99084424,99086840,99087910,99090263	99068279,99076986,99084630,99086948,99088154,99090404	928	-	99062672-99068164	99090405-99103119
17:15240169|15250520	0	0	0	1.67902	1.5665	0	0	1.08184	1.08184	0.392701	0.820938	exon	ENSOCUT00000017814	ENSOCUG00000017812	TCF12	transcription factor 12	---	---	---	---	---	ENSOCUT00000017814	15240169	15250520	5	15240169,15248521,15248884,15249295,15250415	15240247,15248585,15249028,15249434,15250520	535	-	15230841-15240168	15250521-15285371
12:129091304|129091730	2.29975	3.14526	0	0	0	0	1.815	0	-1.815	0.211092	0.820938	intergenic region	n/a	n/a	---	---	---	---	---	---	---	12:129091304|129091730	129091304	129091730	1	129091304	129091730	427	-	---	---
15:36790407|36799382	0	0	0	1.67902	0	2.29975	0	1.32626	1.32626	0.308178	0.820938	exon	ENSOCUT00000007065	ENSOCUG00000007067	---	---	---	---	---	---	---	ENSOCUT00000007065	36790407	36799382	3	36790407,36790765,36799309	36790695,36792633,36799382	2232	+	36789467-36790406	36799383-36799629
3:17439028|17439599	2.29975	2.29975	2.29975	3.82911	4.6172	3.88098	2.29975	4.1091	1.80935	0.346564	0.820938	exon	ENSOCUT00000008262	ENSOCUG00000008254	SEC24A	SEC24 homolog A, COPII coat complex component	---	---	---	---	---	ENSOCUT00000008262	17439028	17439599	2	17439028,17439441	17439148,17439599	280	+	17435494-17439027	17439600-17446885
1:70096241|70109501	0	0	0	1.67902	0	2.29975	0	1.32626	1.32626	0.308178	0.820938	exon	ENSOCUT00000016897	ENSOCUG00000016888	IARS	isoleucyl-tRNA synthetase	---	---	---	---	---	ENSOCUT00000016897	70096241	70109501	5	70096241,70097735,70100054,70102533,70109357	70096362,70097812,70100145,70102653,70109501	558	-	70095847-70096240	70109502-70110559
12:148662985|148666284	0	0	0	1.67902	2.29975	0	0	1.32626	1.32626	0.308178	0.820938	exon	ENSOCUT00000012995	ENSOCUG00000012985	TMEM181	transmembrane protein 181	---	---	---	---	---	ENSOCUT00000012995	148662985	148666284	2	148662985,148666174	148663106,148666284	233	+	148661606-148662984	148666285-148676792
19:53054464|53064577	1.5665	2.29975	2.29975	0	0	0	2.05533	0	-2.05533	0.182249	0.820938	exon	ENSOCUT00000014355	ENSOCUG00000014338	ABCA5	ATP binding cassette subfamily A member 5	---	---	---	---	---	ENSOCUT00000014355	53054464	53064577	4	53054464,53063706,53063926,53064402	53054583,53063800,53064001,53064577	467	-	53053016-53054463	53064578-53065682
1:108221706|108240578	1.5665	1.5665	0	0	0	0	1.04434	0	-1.04434	0.415139	0.820938	exon	ENSOCUT00000014699	ENSOCUG00000014663	ATM	ATM serine/threonine kinase	---	---	---	---	---	ENSOCUT00000014699	108221706	108240578	6	108221706,108229418,108231152,108234369,108239241,108240438	108221820,108229504,108231317,108234518,108239357,108240578	776	-	108216051-108221705	108240579-108241918
19:49370040|49373858	0	1.5665	0	1.67902	3.14526	2.29975	0.522168	2.37468	1.85251	0.323037	0.820938	exon	ENSOCUT00000012763	ENSOCUG00000012756	CEP95	centrosomal protein 95	---	---	---	---	---	ENSOCUT00000012763	49370040	49373858	3	49370040,49373432,49373729	49370233,49373544,49373858	437	+	49368303-49370039	49373859-49374803
3:101947994|101950455	0	0	0	0	1.5665	1.5665	0	1.04434	1.04434	0.404744	0.820938	exon	ENSOCUT00000030075	ENSOCUG00000001086	RMDN1	regulator of microtubule dynamics 1	---	---	---	---	---	ENSOCUT00000030075	101947994	101950455	2	101947994,101950368	101948153,101950455	248	-	101944996-101947993	101950456-101958036
X:94712184|94730133	0	0	0	0	2.78358	2.29975	0	1.69444	1.69444	0.22201	0.820938	exon	ENSOCUT00000004331	ENSOCUG00000004334	TMEM255A	transmembrane protein 255A	---	---	---	---	---	ENSOCUT00000004331	94712184	94730133	3	94712184,94715756,94729991	94712273,94715818,94730133	296	-	94706013-94712183	94730134-94736511
14:55819437|55827734	0	0	0	0	1.5665	1.5665	0	1.04434	1.04434	0.404744	0.820938	exon	ENSOCUT00000017455	ENSOCUG00000017454	NMD3	NMD3 ribosome export adaptor	---	---	---	---	---	ENSOCUT00000017455	55819437	55827734	6	55819437,55822584,55824596,55825850,55826850,55827624	55819582,55822696,55824668,55825956,55826920,55827734	621	+	55816596-55819436	55827735-55866679
9:30892930|30897336	0	1.5665	1.5665	0	0	0	1.04434	0	-1.04434	0.415139	0.820938	exon	ENSOCUT00000024298	ENSOCUG00000021860	---	---	---	---	---	---	---	ENSOCUT00000024298	30892930	30897336	5	30892930,30893089,30894453,30896806,30897209	30892999,30893155,30894510,30896892,30897336	410	-	30891892-30892929	30897337-30898887
2:25823031|25826079	3.67482	0	1.5665	1.67902	0	0	1.74711	0.559675	-1.18743	0.406498	0.820938	exon	ENSOCUT00000015685	ENSOCUG00000015669	ARAP2	ArfGAP with RhoGAP domain, ankyrin repeat and PH domain 2	---	---	---	---	---	ENSOCUT00000015685	25823031	25826079	5	25823031,25823271,25824098,25825934,25826012	25823094,25823469,25824200,25826007,25826079	508	-	25805599-25823030	25826080-25836659
13:135240963|135248037	1.5665	1.5665	2.78358	0	1.5665	0	1.9722	0.522168	-1.45003	0.423528	0.820938	exon	ENSOCUT00000008647	ENSOCUG00000008641	PUM1	pumilio RNA binding family member 1	---	---	---	---	---	ENSOCUT00000008647	135240963	135248037	3	135240963,135243280,135247900	135241092,135243408,135248037	397	+	135239422-135240962	135248038-135252179
5:10018813|10022671	0	0	0	0	1.5665	1.5665	0	1.04434	1.04434	0.404744	0.820938	exon	ENSOCUT00000001739	ENSOCUG00000001738	RPGRIP1L	RPGRIP1 like	---	---	---	---	---	ENSOCUT00000001739	10018813	10022671	2	10018813,10022527	10019111,10022671	444	-	10015047-10018812	10022672-10024877
9:62899591|62904356	1.5665	0	0	0	3.67482	1.5665	0.522168	1.74711	1.22494	0.380346	0.820938	exon	ENSOCUT00000009584	ENSOCUG00000009587	ESCO1	establishment of sister chromatid cohesion N-acetyltransferase 1	---	---	---	---	---	ENSOCUT00000009584	62899591	62904356	4	62899591,62901622,62902167,62904242	62899712,62901634,62902207,62904356	291	-	62895203-62899590	62904357-62912845
2:122417992|122430636	0	0	0	0	2.29975	1.5665	0	1.28875	1.28875	0.315196	0.820938	exon	ENSOCUT00000002147	ENSOCUG00000002143	VPS54	VPS54, GARP complex subunit	---	---	---	---	---	ENSOCUT00000002147	122417992	122430636	5	122417992,122423705,122424411,122425031,122430573	122418332,122423834,122424592,122425143,122430636	830	+	122407293-122417991	122430637-122442329
3:132617478|132627210	0	0	0	2.43409	0	2.29975	0	1.57795	1.57795	0.250052	0.820938	exon	ENSOCUT00000002585	ENSOCUG00000002581	RAD21	RAD21 cohesin complex component	---	---	---	---	---	ENSOCUT00000002585	132617478	132627210	10	132617478,132618187,132618921,132620174,132620818,132622699,132624972,132625426,132625941,132627104	132617673,132618270,132619070,132620319,132620977,132622922,132625094,132625551,132626147,132627210	1523	-	---	132627211-132635820
1:152274617|152279453	0	2.29975	2.78358	0	0	0	1.69444	0	-1.69444	0.229082	0.820938	exon	ENSOCUT00000002805	ENSOCUG00000002807	RNF141	ring finger protein 141	---	---	---	---	---	ENSOCUT00000002805	152274617	152279453	3	152274617,152277700,152279345	152274724,152277881,152279453	399	-	152267606-152274616	152279454-152285353
15:67395045|67400401	1.5665	0	2.29975	0	0	0	1.28875	0	-1.28875	0.324028	0.820938	exon	ENSOCUT00000012515	ENSOCUG00000012516	LIN54	lin-54 DREAM MuvB core complex component	---	---	---	---	---	ENSOCUT00000012515	67395045	67400401	6	67395045,67395265,67397598,67398947,67400002,67400264	67395118,67395462,67397689,67399018,67400104,67400401	677	+	67388723-67395044	67400402-67407252
17:29566402|29570922	1.5665	0	1.5665	0	0	0	1.04434	0	-1.04434	0.415139	0.820938	exon	ENSOCUT00000011023	ENSOCUG00000011018	STARD9	StAR related lipid transfer domain containing 9	---	---	---	---	---	ENSOCUT00000011023	29566402	29570922	4	29566402,29568170,29568325,29570806	29566514,29568231,29568357,29570922	325	-	29551473-29566401	29570923-29613136
1:87711792|87719276	3.67482	2.78358	2.29975	1.67902	0	0	2.91938	0.559675	-2.35971	0.2436	0.820938	exon	ENSOCUT00000027688	ENSOCUG00000025278	ARHGAP32	Rho GTPase activating protein 32	---	---	---	---	---	ENSOCUT00000027688	87711792	87719276	2	87711792,87719168	87712052,87719276	370	+	---	87719277-87748843
13:13625884|13660295	0	0	0	1.67902	1.5665	0	0	1.08184	1.08184	0.392701	0.820938	exon	ENSOCUT00000011348	ENSOCUG00000011322	KMT2C	lysine methyltransferase 2C	---	---	---	---	---	ENSOCUT00000011348	13625884	13660295	4	13625884,13654694,13656735,13660095	13626046,13654803,13656883,13660295	623	-	13615885-13625883	13660296-13667279
2:158239024|158258664	0	0	0	2.43409	1.5665	0	0	1.33353	1.33353	0.301396	0.820938	exon	ENSOCUT00000010691	ENSOCUG00000010692	RBKS	ribokinase	---	---	---	---	---	ENSOCUT00000010691	158239024	158258664	4	158239024,158252748,158253732,158258500	158239156,158252811,158253794,158258664	425	+	158208840-158239023	158258665-158270426
17:75648912|75650404	0	0	0	0	0	3.88098	0	1.29366	1.29366	0.234678	0.820938	exon	ENSOCUT00000000756	ENSOCUG00000000756	EXOC5	exocyst complex component 5	---	---	---	---	---	ENSOCUT00000000756	75648912	75650404	2	75648912,75650322	75649124,75650404	296	-	75645705-75648911	75650405-75653681
14:98852677|98869606	0	0	0	1.67902	0	2.29975	0	1.32626	1.32626	0.308178	0.820938	exon	ENSOCUT00000014932	ENSOCUG00000014932	GSK3B	glycogen synthase kinase 3 beta	---	---	---	---	---	ENSOCUT00000014932	98852677	98869606	3	98852677,98859528,98869476	98852760,98859638,98869606	326	+	98818519-98852676	98869607-98880941
17:8119287|8129700	0	0	0	0	2.29975	2.29975	0	1.53317	1.53317	0.259149	0.820938	exon	ENSOCUT00000005449	ENSOCUG00000005449	SNX1	sorting nexin 1	---	---	---	---	---	ENSOCUT00000005449	8119287	8129700	4	8119287,8123584,8124570,8129589	8119330,8123650,8124697,8129700	351	-	8116951-8119286	8129701-8146484
11:854100|864792	1.5665	0	1.5665	0	0	0	1.04434	0	-1.04434	0.415139	0.820938	exon	ENSOCUT00000004136	ENSOCUG00000004138	SERINC5	serine incorporator 5	---	---	---	---	---	ENSOCUT00000004136	854100	864792	5	854100,857419,862804,864198,864614	854195,857630,862897,864280,864792	664	-	851039-854099	864793-882599
16:52321912|52323118	0	0	1.5665	3.58623	1.5665	2.29975	0.522168	2.48416	1.96199	0.281006	0.820938	exon	ENSOCUT00000013160	ENSOCUG00000013162	MARC2	mitochondrial amidoxime reducing component 2	---	---	---	---	---	ENSOCUT00000013160	52321912	52323118	2	52321912,52322956	52322052,52323118	304	-	52310153-52321911	52323119-52327394
1:173114794|173118917	0	3.4342	0	0	0	0	1.14473	0	-1.14473	0.294414	0.820938	exon_intron	ENSOCUT00000014610	ENSOCUG00000014606	---	---	---	---	---	---	---	ENSOCUT00000014610	173114794	173118917	3	173114794,173114855,173118828	173114853,173114957,173118917	253	-	173103797-173114793	173118918-173123024
1:7514565|7516859	2.29975	0	1.5665	0	0	0	1.28875	0	-1.28875	0.324028	0.820938	exon	ENSOCUT00000024761	ENSOCUG00000023297	FSD1L	fibronectin type III and SPRY domain containing 1 like	---	---	---	---	---	ENSOCUT00000024761	7514565	7516859	2	7514565,7516608	7514653,7516859	341	-	7508207-7514564	7516860-7517981
12:27146158|27149399	0	1.5665	1.5665	0	0	0	1.04434	0	-1.04434	0.415139	0.820938	exon	ENSOCUT00000009888	ENSOCUG00000009887	TBC1D22B	TBC1 domain family member 22B	---	---	---	---	---	ENSOCUT00000009888	27146158	27149399	3	27146158,27148648,27149329	27146465,27148827,27149399	559	+	27131336-27146157	27149400-27151098
5:29702482|29706877	1.5665	0	1.5665	1.67902	2.29975	3.14526	1.04434	2.37468	1.33034	0.477345	0.820938	exon	ENSOCUT00000025706	ENSOCUG00000011087	WDR59	WD repeat domain 59	---	---	---	---	---	ENSOCUT00000025706	29702482	29706877	2	29702482,29706828	29702617,29706877	186	-	29696226-29702481	29706878-29725548
4:12043223|12064527	2.29975	0	1.5665	0	0	0	1.28875	0	-1.28875	0.324028	0.820938	exon	ENSOCUT00000021450	ENSOCUG00000024010	GPCPD1	glycerophosphocholine phosphodiesterase 1	---	---	---	---	---	ENSOCUT00000021450	12043223	12064527	10	12043223,12044756,12045447,12046977,12051182,12052932,12054833,12057899,12061814,12064486	12043284,12044795,12045524,12047069,12051236,12053064,12054995,12058130,12061937,12064527	1022	-	12040774-12043222	12064528-12066328
2:164459973|164528417	0	1.5665	1.5665	0	0	0	1.04434	0	-1.04434	0.415139	0.820938	exon	ENSOCUT00000015484	ENSOCUG00000015460	NBAS	neuroblastoma amplified sequence	---	---	---	---	---	ENSOCUT00000015484	164459973	164528417	5	164459973,164483745,164503463,164527169,164528284	164460101,164483813,164503601,164527267,164528417	570	-	164447698-164459972	164528418-164531402
13:63245750|63271026	1.5665	0	1.5665	0	0	0	1.04434	0	-1.04434	0.415139	0.820938	exon	ENSOCUT00000010517	ENSOCUG00000010517	SLC30A7	solute carrier family 30 member 7	---	---	---	---	---	ENSOCUT00000010517	63245750	63271026	6	63245750,63249660,63260253,63265765,63266541,63270913	63245885,63249710,63260396,63265891,63266628,63271026	660	-	63214036-63245749	63271027-63282131
10:24963515|24965024	0	0	0	1.67902	1.5665	0	0	1.08184	1.08184	0.392701	0.820938	exon	ENSOCUT00000006566	ENSOCUG00000006563	GLI3	GLI family zinc finger 3	---	---	---	---	---	ENSOCUT00000006566	24963515	24965024	2	24963515,24964875	24963679,24965024	315	-	24959124-24963514	24965025-25011178
14:154716177|154722532	1.5665	0	1.5665	0	0	0	1.04434	0	-1.04434	0.415139	0.820938	exon	ENSOCUT00000006484	ENSOCUG00000006485	MRPL39	mitochondrial ribosomal protein L39	---	---	---	---	---	ENSOCUT00000006484	154716177	154722532	3	154716177,154720588,154722467	154716224,154720741,154722532	268	-	154711643-154716176	154722533-154728228
1:71508866|71511344	0	0	1.5665	3.58623	2.29975	3.14526	0.522168	3.01041	2.48825	0.21341	0.820938	exon	ENSOCUT00000000256	ENSOCUG00000000256	PTPDC1	protein tyrosine phosphatase domain containing 1	---	---	---	---	---	ENSOCUT00000000256	71508866	71511344	2	71508866,71511234	71509051,71511344	297	+	71499919-71508865	71511345-71517143
12:121958679|121980186	3.14526	2.78358	3.4342	1.67902	0	0	3.12101	0.559675	-2.56134	0.223509	0.820938	exon	ENSOCUT00000014442	ENSOCUG00000014432	ENPP3	ectonucleotide pyrophosphatase/phosphodiesterase 3	---	---	---	---	---	ENSOCUT00000014442	121958679	121980186	4	121958679,121973857,121978779,121980054	121958833,121973992,121978856,121980186	502	+	121956529-121958678	121980187-121983301
2:132433168|132435586	0	0	0	2.43409	1.5665	0	0	1.33353	1.33353	0.301396	0.820938	exon	ENSOCUT00000023069	ENSOCUG00000014412	ERLEC1	endoplasmic reticulum lectin 1	---	---	---	---	---	ENSOCUT00000023069	132433168	132435586	3	132433168,132433390,132435552	132433297,132433613,132435586	389	-	132424143-132433167	132435587-132437959
1:130435106|130447512	0	0	0	1.67902	0	1.5665	0	1.08184	1.08184	0.392701	0.820938	exon	ENSOCUT00000024649	ENSOCUG00000021263	EED	embryonic ectoderm development	---	---	---	---	---	ENSOCUT00000024649	130435106	130447512	6	130435106,130437796,130442394,130443459,130444627,130447420	130435239,130437887,130442475,130443584,130444692,130447512	593	-	130432823-130435105	130447513-130449397
7:62245728|62263402	1.5665	1.5665	0	0	0	0	1.04434	0	-1.04434	0.415139	0.820938	exon	ENSOCUT00000026465	ENSOCUG00000023503	---	---	---	---	---	---	---	ENSOCUT00000026465	62245728	62263402	8	62245728,62247511,62249597,62251729,62252532,62253519,62256023,62263272	62245788,62247610,62249697,62251807,62252628,62253693,62256135,62263402	857	-	62240446-62245727	62263403-62267066
2:28802182|28803126	0	0	0	0	1.5665	1.5665	0	1.04434	1.04434	0.404744	0.820938	exon	ENSOCUT00000009096	ENSOCUG00000009096	LIAS	lipoic acid synthetase	---	---	---	---	---	ENSOCUT00000009096	28802182	28803126	2	28802182,28803015	28802252,28803126	183	+	28799166-28802181	28803127-28806186
13:114242493|114262023	1.5665	2.78358	3.4342	0	1.5665	0	2.59476	0.522168	-2.07259	0.27133	0.820938	exon	ENSOCUT00000002399,ENSOCUT00000034025	ENSOCUG00000002390	ZCCHC11	zinc finger CCHC-type containing 11	---	---	---	---	---	ENSOCUT00000002399	114242493	114262023	10	114242493,114245369,114248994,114249148,114249528,114253377,114261154,114261361,114261805,114261941	114242579,114245472,114249051,114249251,114249617,114253490,114261231,114261538,114261852,114262023	944	+	114235865-114242492	114262024-114269984
11:29263470|29333977	0	0	0	0	1.5665	2.29975	0	1.28875	1.28875	0.315196	0.820938	exon	ENSOCUT00000003409	ENSOCUG00000003404	MAN2A1	mannosidase alpha class 2A member 1	---	---	---	---	---	ENSOCUT00000003409	29263470	29333977	12	29263470,29268835,29272024,29284761,29300631,29305903,29309509,29314980,29322548,29327362,29332546,29333910	29263685,29269089,29272168,29284932,29300758,29306076,29309695,29315157,29322750,29327544,29332660,29333977	2024	+	---	29333978-29363637
2:101324080|101324640	0	0	0	1.67902	1.5665	0	0	1.08184	1.08184	0.392701	0.820938	exon	ENSOCUT00000010074	ENSOCUG00000010075	TRABD2A	TraB domain containing 2A	---	---	---	---	---	ENSOCUT00000010074	101324080	101324640	1	101324080	101324640	561	+	101312636-101324079	101324641-101366403
4:4942504|4950803	0	0	0	1.67902	2.29975	0	0	1.32626	1.32626	0.308178	0.820938	exon	ENSOCUT00000009642	ENSOCUG00000009637	NCOA6	nuclear receptor coactivator 6	---	---	---	---	---	ENSOCUT00000009642	4942504	4950803	3	4942504,4947406,4950648	4942608,4947687,4950803	543	+	4941080-4942503	4950804-4957106
17:54830898|54841109	0	0	0	0	1.5665	2.78358	0	1.45003	1.45003	0.261483	0.820938	exon	ENSOCUT00000005767	ENSOCUG00000005768	PPP2R3C	protein phosphatase 2 regulatory subunit Bgamma	---	---	---	---	---	ENSOCUT00000005767	54830898	54841109	3	54830898,54840089,54841012	54831030,54840159,54841109	302	-	54822754-54830897	54841110-54843187
13:103070119|103073785	0	2.78358	1.5665	0	0	0	1.45003	0	-1.45003	0.271531	0.820938	exon	ENSOCUT00000000282	ENSOCUG00000000281	ALG6	ALG6, alpha-1,3-glucosyltransferase	---	---	---	---	---	ENSOCUT00000000282	103070119	103073785	3	103070119,103071503,103073650	103070203,103071588,103073785	307	-	103064977-103070118	103073786-103074685
3:62330902|62449505	0	2.29975	1.5665	0	0	0	1.28875	0	-1.28875	0.324028	0.820938	exon	ENSOCUT00000033933,ENSOCUT00000001706	ENSOCUG00000001693	PRKDC	protein kinase, DNA-activated, catalytic polypeptide	---	---	---	---	---	ENSOCUT00000001706	62330902	62449505	49	62330902,62332711,62334209,62335013,62336903,62339474,62343020,62349382,62353008,62361282,62362394,62363377,62364859,62366633,62367996,62368224,62376664,62377855,62378563,62379416,62384330,62384668,62385386,62387998,62389009,62389841,62392588,62393022,62401615,62403178,62405426,62405923,62410666,62411993,62412602,62413227,62415276,62424677,62427416,62428708,62430920,62434598,62437307,62437490,624…	62331013,62332819,62334433,62335201,62337041,62339679,62343199,62349513,62353120,62361500,62362586,62363584,62364957,62366806,62368145,62368348,62376775,62377986,62378714,62379559,62384449,62384802,62385534,62388070,62389074,62390009,62392766,62393229,62401742,62403345,62405530,62406108,62410872,62412151,62412734,62413435,62415499,62424931,62427549,62428807,62431014,62434824,62437414,62437642,624…	7445	-	62326143-62330901	62449506-62450228
2:154210595|154226562	1.5665	0	1.5665	0	0	0	1.04434	0	-1.04434	0.415139	0.820938	exon_intron	ENSOCUT00000010256	ENSOCUG00000010252	SPAST	spastin	---	---	---	---	---	ENSOCUT00000010256	154210595	154226562	6	154210595,154210943,154211449,154216203,154221943,154226479	154210688,154211076,154211640,154216297,154222026,154226562	683	-	154203884-154210594	154226574-154228403
15:95896744|95930102	3.14526	0	0	0	0	0	1.04842	0	-1.04842	0.334534	0.820938	exon	ENSOCUT00000013457	ENSOCUG00000013454	PRDM5	PR/SET domain 5	---	---	---	---	---	ENSOCUT00000013457	95896744	95930102	4	95896744,95919693,95924839,95930009	95896829,95919786,95924999,95930102	435	-	95842074-95896743	95930103-95952057
12:123834007|123850419	0	0	0	0	1.5665	1.5665	0	1.04434	1.04434	0.404744	0.820938	exon	ENSOCUT00000022262	ENSOCUG00000000635	EYA4	EYA transcriptional coactivator and phosphatase 4	---	---	---	---	---	ENSOCUT00000022262	123834007	123850419	8	123834007,123835244,123835363,123835573,123837711,123841936,123848809,123850336	123834073,123835361,123835387,123835716,123837790,123842119,123848945,123850419	839	+	123829528-123834006	123850420-123866394
18:51273451|51278195	3.14526	0	0	0	0	0	1.04842	0	-1.04842	0.334534	0.820938	exon	ENSOCUT00000012442	ENSOCUG00000012441	PCGF6	polycomb group ring finger 6	---	---	---	---	---	ENSOCUT00000012442	51273451	51278195	5	51273451,51276394,51276550,51277910,51278096	51273559,51276453,51276605,51278006,51278195	422	-	51262936-51273450	51278196-51279262
17:6589904|6593775	0	0	0	0	0	3.14526	0	1.04842	1.04842	0.327414	0.820938	exon	ENSOCUT00000007964	ENSOCUG00000007953	DENND4A	DENN domain containing 4A	---	---	---	---	---	ENSOCUT00000007964	6589904	6593775	3	6589904,6592131,6593630	6590004,6592349,6593775	466	+	6587056-6589903	6593780-6594799
13:72744621|72748141	2.29975	0	1.5665	0	3.88098	4.36587	1.28875	2.74895	1.4602	0.38278	0.820938	exon	ENSOCUT00000016088	ENSOCUG00000016083	TGFBR3	transforming growth factor beta receptor 3	---	---	---	---	---	ENSOCUT00000016088	72744621	72748141	2	72744621,72748021	72744920,72748141	421	+	72740523-72744620	72748142-72757588
17:69227042|69266472	0	1.5665	2.29975	0	0	0	1.28875	0	-1.28875	0.324028	0.820938	exon	ENSOCUT00000006056	ENSOCUG00000006052	SOS2	SOS Ras/Rho guanine nucleotide exchange factor 2	---	---	---	---	---	ENSOCUT00000006056	69227042	69266472	13	69227042,69229746,69232641,69240024,69240333,69244439,69246907,69252470,69256633,69257101,69258246,69262346,69266362	69227158,69229918,69232758,69240186,69240452,69244661,69247010,69252592,69256714,69257756,69258373,69262444,69266472	2217	-	69222347-69227041	69266473-69269847
20:29427646|29431601	0	0	0	0	1.5665	1.5665	0	1.04434	1.04434	0.404744	0.820938	exon	ENSOCUT00000011407	ENSOCUG00000011399	TTLL5	tubulin tyrosine ligase like 5	---	---	---	---	---	ENSOCUT00000011407	29427646	29431601	3	29427646,29428615,29431500	29427753,29428706,29431601	302	-	29416110-29427645	29431602-29441058
16:52945374|52977046	0	1.5665	1.5665	0	0	0	1.04434	0	-1.04434	0.415139	0.820938	exon	ENSOCUT00000010426	ENSOCUG00000010419	IARS2	isoleucyl-tRNA synthetase 2, mitochondrial	---	---	---	---	---	ENSOCUT00000010426	52945374	52977046	12	52945374,52948235,52949328,52963310,52966050,52968338,52969843,52975646,52976391,52976565,52976758,52976898	52945482,52948328,52949430,52963470,52966201,52968428,52970012,52975761,52976484,52976674,52976807,52977046	1399	-	52936479-52945373	52977047-52980221
5:9962081|9964232	0	0	0	1.67902	0	1.5665	0	1.08184	1.08184	0.392701	0.820938	exon	ENSOCUT00000001739	ENSOCUG00000001738	RPGRIP1L	RPGRIP1 like	---	---	---	---	---	ENSOCUT00000001739	9962081	9964232	3	9962081,9963503,9964134	9962154,9963665,9964232	336	-	9956103-9962080	9964233-9967075
16:77752470|77753657	0	0	0	1.67902	2.29975	0	0	1.32626	1.32626	0.308178	0.820938	exon	ENSOCUT00000012816	ENSOCUG00000012814	TROVE2	TROVE domain family member 2	---	---	---	---	---	ENSOCUT00000012816	77752470	77753657	3	77752470,77752868,77753437	77752607,77753014,77753657	506	-	77749738-77752469	77753658-77758976
16:6268134|6279889	0	0	0	1.67902	1.5665	3.14526	0	2.13026	2.13026	0.150935	0.820938	exon	ENSOCUT00000004714	ENSOCUG00000004713	---	---	---	---	---	---	---	ENSOCUT00000004714	6268134	6279889	4	6268134,6273161,6273820,6279783	6268442,6273273,6273935,6279889	645	-	6256278-6268133	6279890-6332655
8:78931254|78968591	0	0	0	2.43409	0	2.78358	0	1.73922	1.73922	0.215519	0.820938	exon_intron	ENSOCUT00000011928	ENSOCUG00000011902	MYCBP2	MYC binding protein 2, E3 ubiquitin protein ligase	---	---	---	---	---	ENSOCUT00000011928	78931254	78968591	7	78931254,78934200,78934417,78935962,78938654,78939424,78939974	78931345,78934327,78934542,78936134,78938807,78939628,78968591	29496	-	78927231-78931253	---
13:138511630|138515922	0	2.78358	2.29975	0	0	1.5665	1.69444	0.522168	-1.17227	0.465664	0.820938	exon	ENSOCUT00000006403	ENSOCUG00000006400	ZDHHC18	zinc finger DHHC-type containing 18	---	---	---	---	---	ENSOCUT00000006403	138511630	138515922	6	138511630,138512338,138513599,138514158,138514313,138515773	138511729,138512450,138513706,138514201,138514450,138515922	653	-	138509528-138511629	138515923-138529712
9:72260038|72284360	0	0	0	0	3.14526	0	0	1.04842	1.04842	0.327414	0.820938	exon	ENSOCUT00000012505	ENSOCUG00000029143	DSC3	desmocollin 3	---	---	---	---	---	ENSOCUT00000012505	72260038	72284360	10	72260038,72265513,72267913,72270210,72271622,72271875,72279306,72279892,72282468,72284216	72260292,72265634,72268137,72270434,72271764,72272134,72279491,72280026,72282634,72284360	1863	-	72258001-72260037	72284361-72286207
19:3158298|3180095	1.5665	0	2.29975	0	0	0	1.28875	0	-1.28875	0.324028	0.820938	exon	ENSOCUT00000013393	ENSOCUG00000013388	ULK2	unc-51 like autophagy activating kinase 2	---	---	---	---	---	ENSOCUT00000013393	3158298	3180095	7	3158298,3164536,3164951,3174833,3176803,3177893,3180022	3158469,3164624,3164998,3174915,3176861,3177994,3180095	627	-	3151158-3158297	3180096-3181539
7:172378046|172404685	1.5665	2.29975	0	0	0	0	1.28875	0	-1.28875	0.324028	0.820938	exon	ENSOCUT00000011354	ENSOCUG00000011358	CAB39	calcium binding protein 39	---	---	---	---	---	ENSOCUT00000011354	172378046	172404685	3	172378046,172402291,172404567	172378202,172402455,172404685	441	+	172339345-172378045	172404686-172409725
5:29107108|29108949	1.5665	1.5665	0	0	0	0	1.04434	0	-1.04434	0.415139	0.820938	exon	ENSOCUT00000004107	ENSOCUG00000004107	ST3GAL2	ST3 beta-galactoside alpha-2,3-sialyltransferase 2	---	---	---	---	---	ENSOCUT00000004107	29107108	29108949	3	29107108,29108506,29108830	29107287,29108551,29108949	346	+	29101774-29107107	29108950-29109981
13:137514616|137515807	2.29975	2.78358	1.5665	0	0	0	2.21661	0	-2.21661	0.155931	0.820938	exon	ENSOCUT00000008022	ENSOCUG00000008020	EYA3	EYA transcriptional coactivator and phosphatase 3	---	---	---	---	---	ENSOCUT00000008022	137514616	137515807	2	137514616,137515686	137514730,137515807	237	+	137511951-137514615	137515808-137519305
1:3751041|3752162	0	1.5665	2.29975	0	0	0	1.28875	0	-1.28875	0.324028	0.820938	exon	ENSOCUT00000001034	ENSOCUG00000001034	PTPN3	protein tyrosine phosphatase, non-receptor type 3	---	---	---	---	---	ENSOCUT00000001034	3751041	3752162	2	3751041,3751986	3751175,3752162	312	+	3747302-3751040	3752163-3760148
12:115346390|115350280	0	0	0	0	1.5665	1.5665	0	1.04434	1.04434	0.404744	0.820938	exon	ENSOCUT00000008090	ENSOCUG00000008089	NCOA7	nuclear receptor coactivator 7	---	---	---	---	---	ENSOCUT00000008090	115346390	115350280	3	115346390,115347349,115350096	115346503,115347474,115350280	425	+	115340975-115346389	115350281-115356264
13:114865179|114883800	0	2.29975	3.14526	0	0	0	1.815	0	-1.815	0.211092	0.820938	exon	ENSOCUT00000027016	ENSOCUG00000004330	NRDC	nardilysin convertase	---	---	---	---	---	ENSOCUT00000027016	114865179	114883800	3	114865179,114874452,114883705	114865332,114874525,114883800	324	+	114864036-114865178	114883801-114885442
1:104297000|104297149	0	0	0	0	3.14526	0	0	1.04842	1.04842	0.327414	0.820938	exon	ENSOCUT00000017352	ENSOCUG00000017354	NKAPD1	NKAP domain containing 1	---	---	---	---	---	ENSOCUT00000017352	104297000	104297149	1	104297000	104297149	150	-	104294739-104296999	104297150-104299836
13:102954594|102963646	0	0	0	1.67902	0	1.5665	0	1.08184	1.08184	0.392701	0.820938	exon	ENSOCUT00000027124,ENSOCUT00000000286	ENSOCUG00000000286	---	---	---	---	---	---	---	ENSOCUT00000000286	102954594	102963646	5	102954594,102955145,102956024,102956960,102963477	102954715,102955340,102956110,102957171,102963646	787	-	102943365-102954593	---
1:5816615|5822425	0	0	0	2.43409	0	1.5665	0	1.33353	1.33353	0.301396	0.820938	exon	ENSOCUT00000007319	ENSOCUG00000007316	---	---	---	---	---	---	---	ENSOCUT00000007319	5816615	5822425	2	5816615,5822346	5816880,5822425	346	-	5812949-5816614	5822426-5826318
17:72434|100634	0	0	0	0	2.29975	2.29975	0	1.53317	1.53317	0.259149	0.820938	exon	ENSOCUT00000033643,ENSOCUT00000011273	ENSOCUG00000011272	ARIH1	ariadne RBR E3 ubiquitin protein ligase 1	---	---	---	---	---	ENSOCUT00000033643	72434	100634	5	72434,72983,82576,96401,100567	72489,73075,82720,96523,100634	485	-	63842-72433	100635-122026
[truncated: 572 more rows]
